# Supplementary material for: Global analysis of in situ cosmogenic 26 Al and 10 Be and inferred erosion rate ratios in modern fluvial sediments indicates widespread sediment storage and burial during transport
Source: Copernicus journal article supplement (doi:10.5194/gchron-7-213-2025), 2025-07-11
Supplement: Supplementary file 1 [file gchron-7-213-2025-supplement.zip]

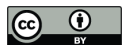

*Supplement of*

**Global analysis of in situ cosmogenic  $^{26}\text{Al}$  and  $^{10}\text{Be}$  and inferred erosion rate ratios in modern fluvial sediments indicates widespread sediment storage and burial during transport**

**Christopher T. Halsted et al.**

*Correspondence to:* Christopher T. Halsted (ch22@williams.edu)

- gchron-7-213-2025-supplement-title-page.pdf
- FluvialRatios\_Supplement.docx
- TS1\_Published\_Al\_Be\_Measurements\_Jan2025.xlsx
- TS2\_New\_Al\_Measurements\_Jan2025.xlsx

The copyright of individual parts of the supplement might differ from the article licence.
