# Supplementary material for: Global analysis of in situ cosmogenic 26 Al and 10 Be and inferred erosion rate ratios in modern fluvial sediments indicates widespread sediment storage and burial during transport
Source: Copernicus journal article supplement (doi:10.5194/gchron-7-213-2025), 2025-07-11
Supplement: Supplementary file 1 [file gchron-7-213-2025-supplement.zip]

## Sheet: Read Me
Table S1 - Isotope and basin information for paired in situ Al-26 and Be-10 measurements from fluvial samples used in this compilation
The contents of each tab are described below
Basin and Sample Data
Sample sources, isotope measurements, and basin statistics
Methods, sources, and unit explanations for morphological and climatological basin parameters are provided in the supplementary text
Each sample has two IDs:
	Unique ID - A new ID created for this study to ensure each sample has a unique identifier. These IDs are a three letter abbreviation of the first author's last name followed by the original sample ID from the source
	Source ID - The original sample ID used in the source publication. Note that some are not unique.
Standard Correction
A full accounting of original Be and Al concentration measurements for each sample, the AMS standards used for the original measurement
and conversion factors to normalize all measured concentrations to the modern 07KNSTD (for Be) and KNSTD (for Al) AMS standards
CRONUS V3 Entry
Information required to calculate erosion rates for each sample using the online erosion rate calculator formerly known as CRONUS (version 3)
Data is formatted for easy entry, copy the row(s) corresponding to the sample(s) you want to input and paste into the CRONUS entry field
As of this writing, the online erosion rate calculator can be found at this URL: https://hess.ess.washington.edu/math/v3/v3_erosion_in.html
Calculated Erosion Rates
Output from the erosion rate calculator formerly known as CRONUS (version 3)
Each sample has erosion rates calculated for both 10-Be and 26-Al, and under three different scaling schemes
Detailed documentation about the scaling shemes can be found at https://hess.ess.washington.edu/math/v3/v3_erosion_in.html
In this study, we use the erosion rates provided by the LSDn scaling scheme (Lifton et al., 2014)

## Sheet: Basin and Sample Data
Unique ID	OCTOPUS_ID	Source ID	AUTHOR	PUBYEAR	DOI	Be-10 Concentration (atoms/g)	Be-10 Conc Uncertainty (atoms/g)	Al-26 Concentration (atoms/g)	Al-26 Conc Uncertainty (atoms/g)	Al-26/Be-10 Concentration Ratio	Al-26/Be-10 Conc Ratio Uncertainty	Be Erosion Rate (m/myr)	Be Erosion Internal Uncertainty (m/myr)	Be Erosion External Uncertainty (m/myr)	Al Erosion Rate (m/myr)	Al Erosion Internal Uncertainty (m/myr)	Al Erosion External Uncertainty (m/myr)	Be/Al Erosion Rate Ratio	Be/Al Erosion Ratio Unc (int)	Be/Al Erosion Ratio Unc (ext)	Distinguishable from 1 (1-sigma) (1 = lower, 2 = higher)	Distinguishable from 1 (2-sigma) (1 = lower, 2 = higher)	Basin Central Latitude (°N)	Basin Central Longitude (°E)	Sampling Latitude (°N)	Sampling Longitude (°E)	Effective Atm. Pressure	Basin Area (km2)	Mean Basin Elevation - 90m raster (m a.s.l.)	Mean Basin Elevation - 500m raster (m a.s.l.)	Mean Basin Elevation - 1000m raster (m a.s.l.)	Multi-Resolution Mean Basin Elevation (m a.s.l.)	Mean Basin Slope - 90m raster (degrees)	Mean Basin Slope - 500m raster (degrees)	Mean Basin Slope - 1000m raster (degrees)	Multi-Resolution Mean Basin Slope (degrees)	Mean Local Relief (m/ 2km)	Mean Local Relief Standard Deviation (m/ 2km)	Basin Mean Annual Precipitation (mm)	Basin Mean Aridity Index (AI Units)	Intermittent Flow Probability	Mean Strain Rate (mm/yr)	Tectonics Classification	Dominant Basin Lithology	Number of lithologies in basin	LGM Ice Cover (km2)	LGM Ice Cover (%)	Present Ice Cover (km2)	Present Ice Cover (%)
ADA2018_WA1501	S216WTS001	WA1501	Adams	2018	10.5194/esurf-6-595-2018	11738	633	74391	6678	6.33762	0.104722	805	43.4	64.4	911	81.8	113	0.883644	0.104734	0.1476	1	0	47.7665	-123.39	47.8109	-123.445	854.74	48.3947	1379.76	1368.18	1365.48	1366.83	45.9861	49.2292	46.7791	47.3314	960.957	109.949	2676.02	33994.9	0.059932	91.4837	Active	Siliciclastic Sedimentary Rocks	2	48.3947	100	0.2	0.45
ADA2018_WA1502	S216WTS002	WA1502	Adams	2018	10.5194/esurf-6-595-2018	9324	527	48421	7135	5.19316	0.157822	926	52.4	75.7	1290	190	220	0.717829	0.157783	0.189124	1	0	47.8953	-123.573	47.9472	-123.564	869.2	66.4054	1225.98	1221.25	1205.56	1213.4	44.8798	48.4122	42.7653	45.3524	973.267	120.092	2576.61	33032.2	0.028989	179.109	Active	Siliciclastic Sedimentary Rocks	1	66.4054	100	2	2.97
ADA2018_WA1503	S216WTS003	WA1503	Adams	2018	10.5194/esurf-6-595-2018	6934	445	38878	6227	5.60686	0.172547	1220	78.2	106	1570	251	285	0.77707	0.172244	0.20125	1	0	47.9321	-123.654	47.9696	-123.599	873.99	40.5057	1176.97	1163.68	1141.59	1152.64	50.0917	60.6141	48.6147	53.1068	1072.2	176.558	2586.13	33014.2	0.0323031	160.589	Active	Siliciclastic Sedimentary Rocks	1	40.5057	100	1.1	2.67
ADA2018_WA1519	S216WTS004	WA1519	Adams	2018	10.5194/esurf-6-595-2018	2980	288	10783	3104	3.61846	0.303651	3340	323	378	6460	1860	1940	0.517028	0.303732	0.320927	1	0	47.8406	-123.659	47.8792	-123.708	852.68	114.376	1381.14	1367.33	1376.42	1371.87	46.4523	49.9622	44.9232	47.1126	1058.68	175.034	2829.17	37903	0.0821814	195.616	Active	Siliciclastic Sedimentary Rocks	1	114.376	100	19.6	17.15
ADA2018_WA1520	S216WTS005	WA1520	Adams	2018	10.5194/esurf-6-595-2018	10906	583	73333	10379	6.7241	0.151291	789	42.2	62.8	839	119	139	0.940405	0.151585	0.183801	0	0	47.899	-123.771	47.8852	-123.751	868.22	5.86863	1237.29	1220.29	1265.4	1242.84	46.1768	66.8582	76.1356	63.0569	1234.59	55.3008	2875	36372.4	0.161662	143.373	Active	Siliciclastic Sedimentary Rocks	1	5.86863	100	0	0
ADA2018_WA1522	S216WTS006	WA1522	Adams	2018	10.5194/esurf-6-595-2018	15665	1129	132290	9907	8.44494	0.103936	540	38.9	50.3	451	33.8	51.5	1.19734	0.103952	0.147364	2	0	47.9617	-123.719	47.9774	-123.687	868.75	19.0813	1252.94	1241.61	1239.53	1240.57	45.2548	41.3155	28.6651	38.4118	808.938	62.6334	2684.67	34732	0.0617871	158.629	Active	Siliciclastic Sedimentary Rocks	1	9.22512	48.3463	0	0
ADA2018_WA1523	S216WTS007	WA1523	Adams	2018	10.5194/esurf-6-595-2018	3844	345	10539	2435	2.74168	0.247866	2560	230	275	6520	1510	1610	0.392638	0.248411	0.269286	1	1	47.8392	-123.633	47.8777	-123.691	854.57	74.5026	1377.61	1366.6	1377.68	1372.14	45.7967	45.9969	41.9584	44.584	991.699	160.563	2813.67	37812.8	0.0738722	210.196	Active	Siliciclastic Sedimentary Rocks	1	74.5026	100	9.3	12.54
ADA2018_WA1524	S216WTS008	WA1524	Adams	2018	10.5194/esurf-6-595-2018	2573	255	21763	4289	8.45822	0.220594	4130	410	477	3490	688	750	1.18338	0.22072	0.24397	0	0	47.8314	-123.707	47.8735	-123.693	842.79	35.3905	1462.07	1438.97	1445.86	1442.42	47.9283	58.4901	49.9755	52.1313	1186.74	125.919	2886.02	38578.6	0.104401	167.028	Active	Siliciclastic Sedimentary Rocks	1	35.3905	100	10.3	29.05
ADA2018_WA1525	S216WTS009	WA1525	Adams	2018	10.5194/esurf-6-595-2018	5625	397	26581	4208	4.72551	0.173329	1950	138	180	2950	467	531	0.661017	0.173404	0.202289	1	0	47.8851	-123.295	47.9176	-123.241	839.04	133.293	1528.65	1523.7	1518.28	1520.99	46.0135	52.0472	34.9911	44.3506	933.875	149.357	2627.55	33172	0.0599978	40.8754	Active	Siliciclastic Sedimentary Rocks	2	133.293	100	1.1	0.86
ADA2018_WA1526	S216WTS010	WA1526	Adams	2018	10.5194/esurf-6-595-2018	19765	845	111196	11661	5.6259	0.113249	244	10.4	17.8	311	32.7	42.3	0.784566	0.113455	0.154342	1	0	47.7166	-124.013	47.6783	-124.117	949.09	127.578	550.94	545.684	547.339	546.511	37.1112	29.5045	22.1552	29.5903	581.233	98.3341	3147.5	38550.1	0.0726263	121.243	Active	Siliciclastic Sedimentary Rocks	1	97.6272	76.5236	0	0
ADA2018_WA1527	S216WTS011	WA1527	Adams	2018	10.5194/esurf-6-595-2018	11048	596	80390	9617	7.27643	0.13123	681	36.7	54.4	668	79.9	98.4	1.01946	0.131191	0.167571	0	0	47.6772	-123.623	47.6302	-123.632	886.42	115.001	1084.95	1073.26	1073.79	1073.53	46.3746	46.4707	40.1751	44.3402	930.068	138.075	2820.18	36391.1	0.0692428	109.454	Active	Siliciclastic Sedimentary Rocks	1	104.232	90.6361	0.4	0.35
ADA2018_WA1537	S216WTS012	WA1537	Adams	2018	10.5194/esurf-6-595-2018	5010	376	33985	3912	6.78343	0.137414	1700	127	162	1790	206	257	0.949721	0.137205	0.172322	0	0	47.6693	-123.4	47.6189	-123.467	874.57	69.8844	1174.06	1155	1166.26	1160.63	51.3472	67.6929	57.3914	58.8105	1181.93	110.925	2679.53	34439.4	0.0664765	83.5665	Active	Siliciclastic Sedimentary Rocks	1	69.8844	100	1.4	1.95
ADA2018_WA1538	S216WTS013	WA1538	Adams	2018	10.5194/esurf-6-595-2018	11742	603	71021	6160	6.04846	0.100798	834	42.9	65.3	991	86	121	0.841574	0.100881	0.145047	1	0	47.7564	-123.271	47.7395	-123.176	850.03	170.056	1420.96	1409.04	1414.77	1411.9	47.6649	52.1431	45.1791	48.329	1021.52	138.298	2639.64	33576.4	0.0479411	75.666	Active	Siliciclastic Sedimentary Rocks	2	170.056	100	2	1.2
ADA2018_WA1539	S216WTS014	WA1539	Adams	2018	10.5194/esurf-6-595-2018	21267	915	145691	13348	6.85057	0.101218	388	16.7	28.3	403	37	50.7	0.962779	0.1014	0.145421	0	0	47.9356	-123.762	47.9521	-123.818	871.04	35.3901	1238.06	1231.93	1226.8	1229.37	41.4959	38.8706	33.8168	38.0611	818.588	93.3085	2780.98	35421.8	0.126759	165.006	Active	Siliciclastic Sedimentary Rocks	1	22.5484	63.714	0	0
BAL2005_STR-1-C	S219WTS001	STR-1-C	Balco	2005	10.1002/es.1262	59643.6	4322	412000	28000	6.9077	0.0993465	234	17	21.9	236	16.1	25.9	0.991525	0.0996593	0.144233	0	0	38.6199	-109.217	38.6426	-109.216	764.47	5.02166	2319.39	2330.26	2283.88	2307.07	36.6713	34.275	35.4292	35.4585	671.57	42.0349	393	2441.5	NaN	1.89209	Active	Siliciclastic Sedimentary Rocks	2	0	0	0	0
BAL2005_STR-2W-M	S219WTS005	STR-2W-M	Balco	2005	10.1002/es.1262	73474	2593.2	493000	35000	6.70986	0.0792831	172	6.09	11.9	178	12.7	20	0.966292	0.0796507	0.131952	0	0	38.6285	-109.197	38.6441	-109.211	780.52	8.17606	2184.82	2188.16	2194	2191.08	37.205	40.8676	39.4496	39.1741	640.431	43.3007	380.083	2350.58	0.576264	1.89688	Active	Siliciclastic Sedimentary Rocks	2	0	0	0	0
BEN2022_CRER	S315WTS005	CRER	Ben-Israel	2022	10.1029/2021JF006417	98901.1	9586.99	651061	158076	6.58295	0.261432	114	11.1	13	120	29.4	31.2	0.95	0.263639	0.283908	0	0	38.3751	-110.343	33.6146	-114.524	798.81	468576	1901.95	1898.85	1897.95	1898.4	12.1537	12.0657	12.6339	12.2844	262.658	214.693	314.751	1918.27	0.684608	3.32524	Active	Siliciclastic Sedimentary Rocks	13	19133.3	4.08328	0	0
BEN2022_CRND	S315WTS003	CRND	Ben-Israel	2022	10.1029/2021JF006417	97513.3	9452.46	578916	140559	5.93679	0.261432	120	11.7	13.7	140	34.2	36.3	0.857143	0.263024	0.283307	0	0	38.6808	-110.115	34.8683	-114.56	794.07	438397	1978.68	1975.26	1974.38	1974.82	12.3332	12.2775	12.8149	12.4752	266.464	217.728	319.521	1983.45	0.6696	3.14769	Active	Siliciclastic Sedimentary Rocks	13	19133.3	4.36437	0	0
BEN2022_CRPD	S315WTS004	CRPD	Ben-Israel	2022	10.1029/2021JF006417	285182	14845	1.51418e+06	367637	5.3095	0.248314	41.3	2.17	3.27	53.7	13.2	14	0.769088	0.251363	0.272465	0	0	38.6808	-110.272	34.2661	-114.135	797.73	459412	1932.12	1928.9	1928	1928.45	12.2757	12.1928	12.7554	12.408	265.139	215.302	317.765	1944.61	0.680711	3.28851	Active	Siliciclastic Sedimentary Rocks	13	19133.3	4.16473	0	0
BEN2022_CRTC	S315WTS002	CRTC	Ben-Israel	2022	10.1029/2021JF006417	171361	8869.64	906200	220023	5.28826	0.248253	70.1	3.65	5.53	91.4	22.3	23.7	0.766958	0.249477	0.271034	0	0	38.6808	-110.072	35.2287	-114.585	793.26	434338	1989.61	1986.13	1985.23	1985.68	12.3806	12.3106	12.8321	12.5078	267.07	218.246	320.762	1995.65	0.667805	3.0952	Active	Siliciclastic Sedimentary Rocks	13	19133.3	4.40516	0	0
BEN2022_CRWB	S315WTS001	CRWB	Ben-Israel	2022	10.1029/2021JF006417	116997	9831.5	666770	161890	5.69904	0.256927	102	8.56	10.5	123	30.1	32	0.829268	0.258705	0.279788	0	0	38.6808	-110.052	35.8726	-114.661	792.8	432361	1996.02	1992.51	1991.6	1992.06	12.3776	12.299	12.8075	12.4947	266.794	218.449	321.507	2002.21	0.667238	3.04055	Active	Siliciclastic Sedimentary Rocks	13	19133.3	4.4253	0	0
BEN2022_CRYM	S315WTS006	CRYM	Ben-Israel	2022	10.1029/2021JF006417	132920	12660	755257	183374	5.68203	0.26081	75.3	7.2	8.47	91.7	22.4	23.8	0.821156	0.262322	0.282868	0	0	37.2264	-110.571	32.7354	-114.636	813.56	631090	1704.5	1702.16	1701.23	1701.7	11.6763	11.3109	11.9312	11.6395	249.051	208.411	327.063	1840.69	0.728927	3.79805	Active	Siliciclastic Sedimentary Rocks	13	19133.3	3.03178	0	0
BIE2001_NAM-08	S008WTS001	NAM-08	Bierman	2001	10.2475/ajs.301.4-5.326	1663728	45210	9880000	530000	5.93847	0.0601338	4.16	0.121	0.29	4.57	0.277	0.523	0.910284	0.0672304	0.134003	1	0	-23.2608	16.4756	-23.3179	16.4494	818.68	65.6345	1828.32	1828.28	1827.73	1828	3.98822	2.93839	3.13169	3.35277	76.3477	30.7547	276.072	1214.77	0.948038	0	Post-Orogenic	Acid Plutonic Rocks	3	0	0	0	0
BIE2001_NAM-09	S008WTS002	NAM-09	Bierman	2001	10.2475/ajs.301.4-5.326	515394	18084	2960000	330000	5.74318	0.116878	12.5	0.449	0.878	14.8	1.71	2.16	0.844595	0.120995	0.161969	1	0	-23.2721	16.3119	-23.2475	16.3001	833.96	14.514	1666.64	1667.76	1674.67	1671.21	19.9768	15.3677	15.5453	16.9633	310.464	55.858	244.2	1053.6	0.925486	0	Post-Orogenic	Metamorphic Rocks	3	0	0	0	0
BIE2001_NAM-16	S008WTS003	NAM-16	Bierman	2001	10.2475/ajs.301.4-5.326	750486	18084	4360000	230000	5.80957	0.0579952	7.12	0.179	0.473	8.22	0.465	0.889	0.86618	0.0619042	0.126925	1	1	-22.9448	16.241	-23.3033	15.7734	859.48	6556.92	1392.57	1392.7	1393.4	1393.05	13.4922	9.81522	9.84873	11.052	223.533	132.784	227.246	936.718	0.947929	0	Post-Orogenic	Metamorphic Rocks	6	0	0	0	0
BIE2001_NAM-43	S008WTS004	NAM-43	Bierman	2001	10.2475/ajs.301.4-5.326	651024	18084	4.06e+06	210000	6.23633	0.0587111	6.5	0.189	0.444	6.95	0.39	0.757	0.935252	0.0632011	0.128568	1	0	-21.7966	15.6413	-21.7955	15.6381	891.26	0.424117	1109.76	1113	1095.37	1104.18	13.5183	4.31789	3.93255	7.25625	162.2	27.6651	196.073	774.504	NaN	0	Post-Orogenic	Acid Plutonic Rocks	1	0	0	0	0
BIE2001_NAM-46	S008WTS005	NAM-46	Bierman	2001	10.2475/ajs.301.4-5.326	858990	27126	5250000	240000	6.11183	0.055561	5.68	0.189	0.4	6.16	0.309	0.658	0.922078	0.0601952	0.127943	1	0	-21.6847	16.1176	-21.915	15.5715	869.16	4793.63	1320.15	1319.76	1319.39	1319.57	4.16494	4.25342	4.88416	4.43417	100.682	163.476	278.578	1124.27	0.964185	0	Post-Orogenic	Acid Plutonic Rocks	5	0	0	0	0
BIE2001_NAM-52	S008WTS006	NAM-52	Bierman	2001	10.2475/ajs.301.4-5.326	2667390	72336	15470000	670000	5.79968	0.0510994	1.41	0.0463	0.111	1.43	0.0877	0.196	0.986014	0.0695663	0.158062	0	0	-21.4989	15.5545	-22.0857	14.2685	885.04	11490	1147.19	1146.87	1147.44	1147.16	4.5224	4.33793	4.7048	4.52171	103.964	117.092	233.544	952.555	0.950351	0	Post-Orogenic	Acid Plutonic Rocks	6	0	0	0	0
BIE2001_NAM-57	S008WTS007	NAM-57	Bierman	2001	10.2475/ajs.301.4-5.326	732402	27126	4680000	280000	6.38993	0.0703652	5.83	0.227	0.427	6.04	0.397	0.695	0.965232	0.0763956	0.136399	0	0	-20.5237	15.6492	-21.1663	13.6674	886.98	29337.7	1114.04	1113.78	1113.62	1113.7	4.95323	4.15443	4.48097	4.52955	99.2097	136.793	279.019	1139.29	0.935604	0	Post-Orogenic	Metamorphic Rocks	10	0	0	0	0
BIE2005_RP-1	S023WTS001	RP-1	Bierman	2005	10.1002/esp.1255	262218	8137.8	1280000	70000	4.88143	0.0628797	42.5	1.33	2.86	59.7	3.3	6.15	0.711893	0.0635201	0.123047	1	1	35.2741	-107.426	34.4101	-106.853	792.34	16146.4	1697.61	2049.71	2049.28	2049.49	5.64506	7.6966	8.57445	7.30537	168.504	120.315	300.496	1640.37	0.848493	2.24753	Active	Siliciclastic Sedimentary Rocks	10	0	0	0	0
BIE2005_RP-10	S023WTS010	RP-10	Bierman	2005	10.1002/esp.1255	286631	14467.2	1800000	100000	6.27984	0.0750597	42.8	2.17	3.34	46.8	2.64	4.86	0.91453	0.0758466	0.129899	1	0	35.0263	-107.861	35.0608	-107.344	777.73	4742.41	2184.47	2213.14	2212.14	2212.64	8.77537	8.99356	9.93825	9.23573	197.101	117.502	323.687	1822.23	0.825093	2.02926	Active	Siliciclastic Sedimentary Rocks	9	0	0	0	0
BIE2005_RP-14A	S023WTS011	RP-14A	Bierman	2005	10.1002/esp.1255	274877	8137.8	1760000	120000	6.40287	0.0743319	44.8	1.34	2.98	48.2	3.33	5.36	0.929461	0.075284	0.129579	0	0	35.4538	-108.104	35.3552	-108.011	778.58	744.175	2198.36	2228.09	2226.88	2227.48	6.55038	6.96496	7.25355	6.92296	156	71.6809	315.884	1807.63	0.837594	2.02024	Active	Siliciclastic Sedimentary Rocks	4	0	0	0	0
BIE2005_RP-14B	S023WTS012	RP-14B	Bierman	2005	10.1002/esp.1255	242326	7233.6	1680000	90000	6.93282	0.0613267	50.7	1.52	3.37	50.4	2.73	5.17	1.00595	0.06191	0.122232	0	0	35.4538	-108.104	35.3501	-108.01	778.65	746.638	2115.81	2227.74	2226.52	2227.13	4.77969	6.95721	7.24791	6.32827	155.862	71.639	315.713	1806.33	0.838129	2.02024	Active	Siliciclastic Sedimentary Rocks	4	0	0	0	0
BIE2005_RP-18	S023WTS013	RP-18	Bierman	2005	10.1002/esp.1255	2170080	54252	13610000	640000	6.27166	0.0532567	6.65	0.174	0.446	7.02	0.358	0.746	0.947293	0.0573179	0.125662	0	0	35.2745	-108.318	35.342	-108.214	756.01	190.572	2463.44	2463.67	2463.62	2463.65	8.1911	7.8242	7.90773	7.97434	163.538	51.6082	448.806	2792.35	0.670216	1.60093	Active	Siliciclastic Sedimentary Rocks	4	0	0	0	0
BIE2005_RP-19	S023WTS014	RP-19	Bierman	2005	10.1002/esp.1255	100366	3616.8	610000	40000	6.07774	0.0748232	109	3.94	7.56	124	8.18	13.5	0.879032	0.0752219	0.129087	1	0	35.6102	-107.266	35.0338	-106.942	791.88	6594.53	1776.38	2075.43	2075.32	2075.38	5.16451	7.36122	8.09144	6.87239	160.948	125.074	303.828	1710.42	0.851391	2.56763	Active	Siliciclastic Sedimentary Rocks	8	0	0	0	0
BIE2005_RP-2	S023WTS002	RP-2	Bierman	2005	10.1002/esp.1255	345404	9946.2	1910000	100000	5.52975	0.0597524	32.7	0.951	2.17	40.7	2.16	4.16	0.80344	0.0605174	0.121864	1	1	35.3227	-107.443	34.5449	-106.884	791.04	15436.9	1516.2	2065.87	2065.22	2065.54	3.08485	7.76266	8.6105	6.48601	169.618	118.172	302.831	1661.81	0.848426	2.25829	Active	Siliciclastic Sedimentary Rocks	9	0	0	0	0
BIE2005_RP-20	S023WTS015	RP-20	Bierman	2005	10.1002/esp.1255	106696	3616.8	680000	40000	6.37327	0.0678918	102	3.47	6.97	111	6.57	11.6	0.918919	0.0682693	0.124862	1	0	35.3313	-107.235	35.3357	-107.035	791.56	302.687	2079.07	2080.96	2077.6	2079.28	11.3489	11.7479	12.6075	11.9014	257.445	137.45	320.55	1721.61	0.849499	2.30106	Active	Siliciclastic Sedimentary Rocks	5	0	0	0	0
BIE2005_RP-21	S023WTS016	RP-21	Bierman	2005	10.1002/esp.1255	109408	5425.2	610000	40000	5.57545	0.0822117	104	5.16	8.02	128	8.46	14	0.8125	0.0826442	0.133827	1	1	35.7269	-107.318	35.3478	-107.043	787.16	5338.92	2036.12	2128.19	2128.45	2128.32	9.99181	7.41654	8.12614	8.5115	162.953	129.016	308.133	1775.96	0.844183	2.58937	Active	Siliciclastic Sedimentary Rocks	8	0	0	0	0
BIE2005_RP-22	S023WTS017	RP-22	Bierman	2005	10.1002/esp.1255	112121	4521	660000	30000	5.88651	0.060762	102	4.13	7.32	120	5.47	11.7	0.85	0.0609696	0.121064	1	1	35.7269	-107.336	35.5709	-107.168	786.08	4736.18	2125.83	2139.81	2140.06	2139.94	10.9172	6.96702	7.58362	8.48929	152.401	126.687	307.291	1784.63	0.842526	2.59992	Active	Siliciclastic Sedimentary Rocks	8	0	0	0	0
BIE2005_RP-23	S023WTS018	RP-23	Bierman	2005	10.1002/esp.1255	89515.8	4521	510000	40000	5.69732	0.0932858	134	6.8	10.4	162	12.8	18.9	0.82716	0.0939049	0.140124	1	0	35.8969	-106.987	35.5986	-107.18	778.19	1116.97	2115.69	2208.96	2211.15	2210.05	10.5904	10.465	12.2111	11.0888	228.62	177.306	388.574	2392.73	0.767531	2.96796	Active	Siliciclastic Sedimentary Rocks	6	0	0	0	0
BIE2005_RP-24	S023WTS019	RP-24	Bierman	2005	10.1002/esp.1255	65102.4	3616.8	420000	20000	6.45138	0.073171	195	10.9	15.9	210	10	20.7	0.928571	0.0734309	0.127925	0	0	36.033	-106.984	35.9247	-106.986	767.56	538.028	2062.58	2309.31	2311.97	2310.64	4.41313	9.91783	12.1452	8.82538	221.028	190.972	421.909	2739.03	0.737118	2.96917	Active	Siliciclastic Sedimentary Rocks	6	0	0	0	0
BIE2005_RP-25	S023WTS020	RP-25	Bierman	2005	10.1002/esp.1255	94036.8	4521	570000	40000	6.06146	0.0850646	124	5.98	9.46	141	9.96	15.8	0.879433	0.0855307	0.135562	1	0	36.0071	-107.061	35.9498	-107.007	783.57	170.102	2172.89	2173.3	2170.05	2171.67	5.90411	5.25303	4.86055	5.33923	113.322	46.5473	331.686	2004.41	0.837173	2.85482	Active	Siliciclastic Sedimentary Rocks	1	0	0	0	0
BIE2005_RP-26	S023WTS021	RP-26	Bierman	2005	10.1002/esp.1255	44305.8	2712.6	260000	20000	5.86831	0.0983138	294	18	25.1	348	26.8	40.2	0.844828	0.098383	0.143642	1	0	36.0791	-106.946	35.9561	-106.994	761.36	358.098	2383.54	2381.24	2384.75	2382.99	10.7058	12.3115	15.7622	12.9265	276.058	211.627	467	3106.98	0.690648	3.08352	Active	Siliciclastic Sedimentary Rocks	6	0	0	0	0
BIE2005_RP-27	S023WTS022	RP-27	Bierman	2005	10.1002/esp.1255	113929	4521	760000	40000	6.67081	0.065915	98.8	3.93	7.05	103	5.43	10.4	0.959223	0.0660414	0.12364	0	0	35.6593	-107.448	35.5933	-107.192	788.54	3562.52	2034.92	2118.34	2118.03	2118.18	9.70189	5.79754	6.01072	7.17005	126.47	92.0021	281.568	1593.41	0.864326	2.49609	Active	Siliciclastic Sedimentary Rocks	5	0	0	0	0
BIE2005_RP-28	S023WTS023	RP-28	Bierman	2005	10.1002/esp.1255	84994.8	3616.8	580000	30000	6.82395	0.0669788	126	5.39	9.21	129	6.69	13	0.976744	0.0672268	0.124493	0	0	35.8552	-107.24	35.6422	-107.241	794.88	1290.98	2009.11	2057.65	2056.39	2057.02	6.06725	4.0293	4.03407	4.71021	89.3999	33.9243	267.288	1516.44	0.889056	2.71495	Active	Siliciclastic Sedimentary Rocks	1	0	0	0	0
BIE2005_RP-29	S023WTS024	RP-29	Bierman	2005	10.1002/esp.1255	182648	6329.4	1180000	70000	6.4605	0.068702	64.1	2.23	4.41	68.5	4.1	7.22	0.935766	0.0692301	0.125868	0	0	35.5457	-107.574	35.6268	-107.24	784.85	2218.48	2143.37	2155.59	2155.82	2155.7	8.46857	6.73698	7.01612	7.40722	145.559	105.019	289.622	1637.79	0.849095	2.35018	Active	Siliciclastic Sedimentary Rocks	5	0	0	0	0
BIE2005_RP-3	S023WTS003	RP-3	Bierman	2005	10.1002/esp.1255	640174	18988.2	3430000	180000	5.35792	0.0602804	14.2	0.431	0.96	18.2	0.985	1.89	0.78022	0.0620509	0.123913	1	1	34.6803	-107.14	34.5754	-106.89	819.29	465.605	1799.64	1801.94	1799.92	1800.93	5.7746	7.36984	8.78695	7.31046	159.758	116.515	262.603	1254.05	0.852653	2.00872	Active	Siliciclastic Sedimentary Rocks	7	0	0	0	0
BIE2005_RP-30	S023WTS025	RP-30	Bierman	2005	10.1002/esp.1255	66910.8	2712.6	420000	30000	6.27701	0.0821315	162	6.58	11.6	179	12.8	20.1	0.905028	0.0822388	0.133178	1	0	35.9335	-107.273	35.8101	-107.255	791.91	776.774	1998.54	2089.32	2088.15	2088.74	10.6612	3.53843	3.66385	5.95451	77.9609	26.0911	266.77	1544.42	0.885494	2.69453	Active	Siliciclastic Sedimentary Rocks	1	0	0	0	0
BIE2005_RP-31	S023WTS026	RP-31	Bierman	2005	10.1002/esp.1255	52443.6	2712.6	360000	20000	6.86452	0.0759066	205	10.6	16.1	209	11.6	21.4	0.980861	0.0758562	0.129043	0	0	35.9511	-107.172	35.8244	-107.258	791.39	301.266	2092.33	2093.32	2092.17	2092.74	3.99129	3.84895	4.05996	3.96673	82.9171	25.975	277.982	1608.93	0.870437	2.74817	Active	Siliciclastic Sedimentary Rocks	1	0	0	0	0
BIE2005_RP-32	S023WTS027	RP-32	Bierman	2005	10.1002/esp.1255	78665.4	3616.8	480000	30000	6.10179	0.0775895	139	6.39	10.4	157	9.87	16.8	0.88535	0.0778814	0.13057	1	0	35.9322	-107.338	35.8199	-107.271	792.16	471.109	2086.67	2087.53	2086.51	2087.02	3.72667	3.32457	3.39887	3.48337	74.5216	25.5796	259.684	1504.14	0.893646	2.66771	Active	Siliciclastic Sedimentary Rocks	1	0	0	0	0
BIE2005_RP-33	S023WTS028	RP-33	Bierman	2005	10.1002/esp.1255	198020	7233.6	1310000	70000	6.6155	0.0647281	55.8	2.05	3.89	58.3	3.14	5.96	0.957118	0.0651961	0.123737	0	0	35.739	-107.564	35.6567	-107.392	794.72	569.821	2060.44	2061.4	2060.58	2060.99	5.16961	4.33903	4.10894	4.53919	90.866	46.0602	251.216	1394.39	0.866418	2.41886	Active	Siliciclastic Sedimentary Rocks	1	0	0	0	0
BIE2005_RP-34	S023WTS029	RP-34	Bierman	2005	10.1002/esp.1255	192595	7233.6	1270000	70000	6.59416	0.0666983	62.5	2.36	4.39	65.4	3.64	6.74	0.955657	0.0672575	0.124718	0	0	35.4711	-107.634	35.6547	-107.392	780.63	1328.44	2004.32	2199.27	2199.67	2199.47	5.59508	7.27585	7.71046	6.86046	157.399	110.504	302.141	1715.16	0.841788	2.27189	Active	Siliciclastic Sedimentary Rocks	5	0	0	0	0
BIE2005_RP-35	S023WTS030	RP-35	Bierman	2005	10.1002/esp.1255	311045	9946.2	2.03e+06	120000	6.52639	0.0672078	43.2	1.39	2.92	45.5	2.73	4.81	0.949451	0.068083	0.125476	0	0	35.4114	-107.536	35.5883	-107.486	766	464.536	2349.54	2348.87	2351.74	2350.31	9.50007	11.4532	13.3774	11.4435	250.929	118.009	360.409	2134.13	0.804904	2.28379	Active	Siliciclastic Sedimentary Rocks	5	0	0	0	0
BIE2005_RP-36	S023WTS031	RP-36	Bierman	2005	10.1002/esp.1255	339075	11754.6	2310000	140000	6.81265	0.0698203	34.5	1.21	2.38	34.9	2.15	3.73	0.988539	0.0708887	0.127207	0	0	35.4913	-107.648	35.5772	-107.521	786.56	207.215	2143.77	2144.92	2144.19	2144.55	7.17474	6.32276	5.88662	6.46138	131.364	85.6044	283.387	1555.44	0.842298	2.40793	Active	Siliciclastic Sedimentary Rocks	1	0	0	0	0
BIE2005_RP-37	S023WTS032	RP-37	Bierman	2005	10.1002/esp.1255	221529	8137.8	1520000	80000	6.8614	0.0641835	52.4	1.94	3.66	52.8	2.81	5.38	0.992424	0.0648308	0.123536	0	0	35.588	-107.755	35.58	-107.521	787.2	511.212	2139.52	2140.43	2139.49	2139.96	5.26656	4.45184	4.14198	4.62013	95.9105	46.546	271.957	1505.73	0.859257	2.25047	Active	Siliciclastic Sedimentary Rocks	2	0	0	0	0
BIE2005_RP-38	S023WTS033	RP-38	Bierman	2005	10.1002/esp.1255	578688	16275.6	3660000	200000	6.32465	0.0614579	20.8	0.593	1.38	22.4	1.26	2.35	0.928571	0.0630624	0.124129	1	0	35.0282	-107.484	34.9624	-107.221	781.42	1168.14	1990.7	1991.02	1991.59	1991.31	6.39446	7.58242	8.32384	7.43357	160.004	97.8573	281.345	1421.43	0.868258	2.00979	Active	Siliciclastic Sedimentary Rocks	6	0	0	0	0
BIE2005_RP-39	S023WTS034	RP-39	Bierman	2005	10.1002/esp.1255	350830	12658.8	2420000	120000	6.89794	0.0613253	34.6	1.26	2.41	34.4	1.74	3.48	1.00581	0.0623267	0.122823	0	0	35.4244	-107.832	35.3401	-107.793	781.28	251.402	2197.53	2197.76	2196.8	2197.28	6.99452	6.28672	7.03284	6.77136	144.756	84.2068	288.244	1599.43	0.832248	2.73566	Active	Siliciclastic Sedimentary Rocks	3	0	0	0	0
BIE2005_RP-4	S023WTS004	RP-4	Bierman	2005	10.1002/esp.1255	188978	6329.4	960000	60000	5.07996	0.0709085	59.5	2	4.05	80.4	5.06	8.61	0.74005	0.0713493	0.126891	1	1	35.3227	-107.454	34.5839	-106.885	790.17	14939.3	1626.5	2075.24	2074.74	2074.99	4.17107	7.78253	8.61353	6.85571	170.123	118.254	304.235	1675.76	0.848137	2.26672	Active	Siliciclastic Sedimentary Rocks	9	0	0	0	0
BIE2005_RP-40	S023WTS035	RP-40	Bierman	2005	10.1002/esp.1255	504544	18988.2	3220000	170000	6.38201	0.0648357	27.5	1.04	1.94	29.4	1.59	3.03	0.935374	0.0659927	0.124893	0	0	35.3322	-107.678	35.3375	-107.795	762.32	197.494	2411.87	2409.17	2408.79	2408.98	10.5651	13.5927	16.8869	13.6816	307.377	144.151	372.573	2250.91	0.768354	2.37368	Active	Siliciclastic Sedimentary Rocks	5	0	0	0	0
BIE2005_RP-41	S023WTS036	RP-41	Bierman	2005	10.1002/esp.1255	501831	20796.6	3220000	170000	6.4165	0.0671171	25.9	1.09	1.89	27.6	1.49	2.85	0.938406	0.0684513	0.126443	0	0	35.3758	-107.764	35.3358	-107.796	771.72	449.265	2080.49	2291.04	2290.5	2290.77	9.94012	9.51169	11.388	10.2799	216.192	140.039	325.322	1885.9	0.803299	2.59087	Active	Siliciclastic Sedimentary Rocks	5	0	0	0	0
BIE2005_RP-42	S023WTS037	RP-42	Bierman	2005	10.1002/esp.1255	143768	5425.2	990000	60000	6.8861	0.0713939	86.2	3.27	6.06	86.7	5.29	9.18	0.994233	0.0718463	0.127096	0	0	35.5155	-108.089	35.4337	-108.042	774.88	323.731	2264.85	2265.43	2263.96	2264.7	8.64332	7.65149	7.5134	7.93607	172.81	62.8984	321.734	1863.59	0.823512	2.03364	Active	Siliciclastic Sedimentary Rocks	3	0	0	0	0
BIE2005_RP-5	S023WTS005	RP-5	Bierman	2005	10.1002/esp.1255	142864	4521	840000	50000	5.87973	0.0674131	79	2.51	5.31	92.6	5.55	9.75	0.853132	0.0678358	0.124917	1	1	35.3227	-107.477	34.8693	-107.022	788.22	14218.1	1586.67	2097.96	2097.34	2097.65	2.85893	7.93281	8.7523	6.51468	173.348	119.15	307.374	1702.97	0.847101	2.28008	Active	Siliciclastic Sedimentary Rocks	9	0	0	0	0
BIE2005_RP-6	S023WTS006	RP-6	Bierman	2005	10.1002/esp.1255	184457	6329.4	1100000	70000	5.96346	0.0722981	63.3	2.18	4.34	73.1	4.69	7.89	0.865937	0.0728175	0.12787	1	0	35.0298	-107.704	34.8873	-107.033	783.13	7117.05	1928.33	2145.43	2144.43	2144.93	6.95785	8.63876	9.56237	8.38633	188.994	114.064	314.453	1730.14	0.839438	2.05335	Active	Siliciclastic Sedimentary Rocks	9	0	0	0	0
BIE2005_RP-7	S023WTS007	RP-7	Bierman	2005	10.1002/esp.1255	114833	4521	740000	40000	6.44412	0.0668718	94.4	3.73	6.72	101	5.51	10.4	0.934653	0.0673605	0.125181	0	0	35.5437	-107.252	34.892	-107.028	793.93	7077.01	1729.87	2051.98	2051.74	2051.86	5.06653	7.23704	7.95315	6.75224	157.925	122.153	300.554	1677.91	0.854754	2.52348	Active	Siliciclastic Sedimentary Rocks	9	0	0	0	0
BIE2005_RP-8	S023WTS008	RP-8	Bierman	2005	10.1002/esp.1255	243230	7233.6	1740000	100000	7.15373	0.0647101	50.3	1.51	3.34	48.5	2.82	5.08	1.03711	0.0654367	0.124017	0	0	35.027	-107.83	35.0389	-107.339	777.44	5102.73	1815.55	2216.78	2215.52	2216.15	6.76127	9.09046	10.1258	8.65918	199.647	118.815	326.462	1843.48	0.824788	2.04366	Active	Siliciclastic Sedimentary Rocks	9	0	0	0	0
BIE2005_RP-9	S023WTS009	RP-9	Bierman	2005	10.1002/esp.1255	105791	6329.4	640000	40000	6.04964	0.0865203	120	7.17	10.1	136	8.55	14.5	0.882353	0.0867318	0.135836	1	0	35.2232	-107.432	35.0931	-107.323	768.46	309.835	2332.85	2335.29	2334.87	2335.08	9.47471	10.7628	13.2035	11.147	243.989	131.065	380.995	2264.93	0.803413	2.18721	Active	Basic Volcanic Rocks	5	0	0	0	0
BUT2007_SA04-29-1	S257WTS014	SA04-29-1	Butler	2007	N/A - Thesis	1424889	1862.6	7427000	224000	5.21234	0.0301885	3.15	0.00452	0.204	4	0.139	0.419	0.7875	0.0347796	0.123153	1	1	-25.6325	17.623	-27.9087	17.4929	882.4	63788.6	1181.16	1183.81	1183.92	1183.87	3.63164	3.4754	3.73512	3.61405	77.399	74.907	174.107	686.631	0.951189	0	Post-Orogenic	Siliciclastic Sedimentary Rocks	11	0	0	0	0
BUT2007_SA04-35-1	S257WTS015	SA04-35-1	Butler	2007	N/A - Thesis	1.61208e+06	1862.6	9169000	183000	5.68768	0.019992	4.71	0.00579	0.296	5.49	0.121	0.537	0.857923	0.0220743	0.116263	1	1	-31.5022	26.3577	-31.4651	26.3556	829.42	18.1635	1715.77	1723.33	1725.44	1724.39	9.38848	9.65502	8.08994	9.04448	199.184	98.7861	563.8	3246.5	0.902881	0	Post-Orogenic	Siliciclastic Sedimentary Rocks	1	0	0	0	0
BUT2007_SA04-37-1	S257WTS017	SA04-37-1	Butler	2007	N/A - Thesis	431192	931.3	2537000	78000	5.88369	0.0308207	15.3	0.0337	0.922	17.8	0.566	1.68	0.859551	0.0318739	0.111979	1	1	-31.4118	27.4052	-31.4487	27.3804	853.26	123.554	1480.26	1488.4	1492.47	1490.43	12.311	14.8037	15.8909	14.3352	323.005	160.123	613.274	3494.51	0.929876	0	Post-Orogenic	Siliciclastic Sedimentary Rocks	2	0	0	0	0
CAM2022_CU-014	S300WTS001	CU-014	Campbell	2022	10.5194/gchron-4-435-2022	43180	1771	301191	26113	6.97524	0.095911	55.5	2.29	4.01	56	4.91	6.92	0.991071	0.0969021	0.143144	0	0	22.1608	-79.789	22.0656	-79.7976	994.36	738.944	184.13	182.541	182.096	182.319	6.76535	5.03314	4.99147	5.59665	123.582	86.0031	1450.19	7914.36	0.326055	0	Post-Orogenic	Basic Volcanic Rocks	4	0	0	0	0
CAM2022_CU-015	S300WTS002	CU-015	Campbell	2022	10.5194/gchron-4-435-2022	102840	3976	638539	32529	6.20905	0.0639525	22.3	0.875	1.6	25.1	1.31	2.57	0.888446	0.0652956	0.125027	1	0	22.258	-79.4694	22.1503	-79.4252	996.26	458.511	168.72	167.44	168.249	167.845	3.03067	2.62133	2.97135	2.87445	61.2641	21.1991	1435.37	7765.41	0.421533	0	Post-Orogenic	Intermediate Volcanic Rocks	3	0	0	0	0
CAM2022_CU-016	S300WTS003	CU-016	Campbell	2022	10.5194/gchron-4-435-2022	204439	6430	742558	24521	3.63217	0.0456037	11.1	0.359	0.764	21.9	0.743	2.07	0.506849	0.0468729	0.116925	1	1	22.1655	-79.1208	22.1541	-79.0264	991.66	164.676	208.95	207.484	206.365	206.925	4.16903	3.2828	3.25573	3.56919	80.8978	60.4242	1411.42	7722.27	0.383616	0	Post-Orogenic	Carbonate Sedimentary Rocks	3	0	0	0	0
CAM2022_CU-101	S300WTS004	CU-101	Campbell	2022	10.5194/gchron-4-435-2022	112264	2449	718506	25846	6.40015	0.0420696	23.9	0.528	1.52	26	0.956	2.48	0.919231	0.0428956	0.114643	1	0	22.0138	-80.2251	22.0514	-80.2922	970.31	80.3306	375.86	375.477	387.829	381.653	19.2966	20.4175	23.5001	21.0714	432.88	153.874	1387.88	8141.94	0.246324	0	Post-Orogenic	Carbonate Sedimentary Rocks	2	0	0	0	0
CAM2022_CU-102	S300WTS005	CU-102	Campbell	2022	10.5194/gchron-4-435-2022	191657	10788	1271883	138893	6.63625	0.122856	10.5	0.611	0.884	10.8	1.24	1.58	0.972222	0.128719	0.168792	0	0	22.2977	-80.4781	22.301	-80.5023	1010.46	19.5028	47.03	46.6883	46.35	46.5192	1.98771	1.99373	2.11472	2.03205	43.9675	10.5479	1476.38	7999.12	0.409426	0	Post-Orogenic	Carbonate Sedimentary Rocks	2	0	0	0	0
CAM2022_CU-106	S300WTS006	CU-106	Campbell	2022	10.5194/gchron-4-435-2022	966496	18148	3669572	122566	3.79678	0.0383169	1.73	0.0382	0.126	3.21	0.127	0.351	0.538941	0.0453086	0.131381	1	1	22.7008	-80.437	22.707	-80.3672	1006.61	127.918	80.7	80.4632	80.3538	80.4085	1.04459	0.935305	1.0473	1.00906	20.8779	4.89297	1465.69	8162.51	0.440595	0	Post-Orogenic	Carbonate Sedimentary Rocks	3	0	0	0	0
CAM2022_CU-107	S300WTS007	CU-107	Campbell	2022	10.5194/gchron-4-435-2022	261621	11338	1418603	142192	5.42236	0.109201	7.86	0.354	0.598	9.98	1.06	1.4	0.787575	0.115367	0.159584	1	0	22.5404	-79.911	22.5353	-79.8767	1004.19	36.5894	101.37	101	101.649	101.324	2.25054	2.48669	2.8812	2.53948	55.7314	13.0159	1407.5	7737.37	0.417721	0	Post-Orogenic	Carbonate Sedimentary Rocks	2	0	0	0	0
CAM2022_CU-108	S300WTS008	CU-108	Campbell	2022	10.5194/gchron-4-435-2022	87859	5370	606261	119951	6.90039	0.207079	26.3	1.63	2.26	26.5	5.35	5.83	0.992453	0.211186	0.236187	0	0	22.3683	-79.629	22.393	-79.6693	997.14	64.269	161.83	160.566	160.477	160.522	4.15575	3.58761	3.87491	3.87276	78.9189	23.8973	1432.13	7800.98	0.343025	0	Post-Orogenic	Carbonate Sedimentary Rocks	3	0	0	0	0
CAM2022_CU-109	S300WTS009	CU-109	Campbell	2022	10.5194/gchron-4-435-2022	70568	3842	462955	42429	6.56041	0.1066	33	1.81	2.67	35.1	3.27	4.49	0.940171	0.108109	0.15136	0	0	22.3235	-79.7152	22.3572	-79.761	997.42	67.3519	158.62	157.627	157.569	157.598	4.84095	3.40183	3.89106	4.04461	83.8872	43.7437	1436.61	7813.79	0.352311	0	Post-Orogenic	Intermediate Volcanic Rocks	2	0	0	0	0
CAM2022_CU-110	S300WTS010	CU-110	Campbell	2022	10.5194/gchron-4-435-2022	167437	4464	944120	35445	5.63866	0.0460463	16.8	0.456	1.11	20.7	0.798	2	0.811594	0.0471476	0.117049	1	1	21.9502	-80.2076	21.9188	-80.2641	960.44	75.9127	457.57	450.958	452.253	451.605	20.8644	19.6529	21.2163	20.5779	426.478	148.429	1409.01	8406.02	0.218233	0	Post-Orogenic	Carbonate Sedimentary Rocks	1	0	0	0	0
CAM2022_CU-111	S300WTS011	CU-111	Campbell	2022	10.5194/gchron-4-435-2022	40744	2009	278309	17297	6.83067	0.0793343	66.1	3.27	5.1	68.4	4.29	7.32	0.966374	0.0798814	0.131931	0	0	22.074	-79.9552	22.0892	-79.9159	973.24	24.8636	365.66	361.816	355.692	358.754	15.6235	14.4704	13.5302	14.5414	334.181	76.2198	1484.39	8548.32	0.220472	0	Post-Orogenic	Carbonate Sedimentary Rocks	1	0	0	0	0
CAM2022_CU-112	S300WTS012	CU-112	Campbell	2022	10.5194/gchron-4-435-2022	200613	6646	1252852	45182	6.24512	0.04897	15.5	0.524	1.07	17.1	0.639	1.65	0.906433	0.0503912	0.118642	1	0	21.9108	-80.1311	21.8337	-80.1488	943.5	70.5529	607.34	607.955	609.192	608.573	18.7798	15.5678	15.0711	16.4729	357.154	134.468	1476.49	9067.4	0.22108	0	Post-Orogenic	Carbonate Sedimentary Rocks	1	0	0	0	0
CAM2022_CU-113	S300WTS013	CU-113	Campbell	2022	10.5194/gchron-4-435-2022	193008	4542	1197128	36627	6.20248	0.038599	15.9	0.381	1.03	17.6	0.558	1.66	0.903409	0.0397413	0.114422	1	1	21.8967	-80.0857	21.8374	-80.1043	946.23	56.3195	596.56	590.471	584.091	587.281	22.201	23.4746	21.2399	22.3052	454.1	155.814	1492.35	9184.06	0.160829	0	Post-Orogenic	Carbonate Sedimentary Rocks	1	0	0	0	0
CAM2022_CU-114	S300WTS014	CU-114	Campbell	2022	10.5194/gchron-4-435-2022	105663	2868	734157	34880	6.9481	0.0547171	24.2	0.664	1.59	24.1	1.17	2.42	1.00415	0.0557649	0.12	0	0	22.0819	-80.1966	22.1056	-80.2258	978.85	32.3718	309.74	308.646	301.061	304.853	17.4632	14.3184	16.0536	15.9451	323.988	74.0658	1393.78	7982.23	0.284863	0	Post-Orogenic	Carbonate Sedimentary Rocks	1	0	0	0	0
CAM2022_CU-115	S300WTS015	CU-115	Campbell	2022	10.5194/gchron-4-435-2022	81638	3296	683670	30184	8.37441	0.0598266	37.3	1.52	2.69	30.9	1.39	3.05	1.20712	0.0606973	0.122245	2	2	22.0308	-80.066	22.1117	-80.1287	950.82	326.267	555.6	553.147	551.325	552.236	20.9252	20.1504	18.1307	19.7354	386.828	81.0032	1521.1	9262.68	0.172804	0	Post-Orogenic	Carbonate Sedimentary Rocks	1	0	0	0	0
CAM2022_CU-116	S300WTS016	CU-116	Campbell	2022	10.5194/gchron-4-435-2022	109997	2429	718371	40266	6.53082	0.0602448	25.9	0.578	1.65	27.5	1.58	2.89	0.941818	0.0616365	0.122893	0	0	22.0613	-80.0072	22.027	-79.9879	961.21	33.382	477.85	469.748	461.906	465.827	18.9854	17.2694	10.0444	15.4331	319.981	45.8314	1511.88	8950.79	0.208464	0	Post-Orogenic	Carbonate Sedimentary Rocks	1	0	0	0	0
CAM2022_CU-117	S300WTS017	CU-117	Campbell	2022	10.5194/gchron-4-435-2022	49895	2750	278483	29699	5.58138	0.120046	49.5	2.75	4.02	62.6	6.74	8.66	0.790735	0.121156	0.160415	1	0	22.0639	-79.8919	22.0497	-79.843	988.48	41.7268	229.72	223.778	235.146	229.462	13.13	10.5056	11.5184	11.718	238.651	151.841	1447.47	8081.17	0.2382	0	Post-Orogenic	Carbonate Sedimentary Rocks	1	0	0	0	0
CAM2022_CU-118	S300WTS018	CU-118	Campbell	2022	10.5194/gchron-4-435-2022	72971	3572	372418	61347	5.10364	0.171846	32.4	1.6	2.51	45.1	7.52	8.49	0.718404	0.1739	0.203565	1	0	22.3423	-79.832	22.3763	-79.8168	994.4	41.9279	185.68	181.024	190	185.512	9.18858	8.27702	9.3283	8.9313	177.79	83.4174	1451.67	8081.5	0.266781	0	Post-Orogenic	Basic Plutonic Rocks	1	0	0	0	0
CAM2022_CU-119	S300WTS019	CU-119	Campbell	2022	10.5194/gchron-4-435-2022	386875	7516	2260671	95226	5.84341	0.0463871	5.17	0.106	0.34	5.94	0.275	0.626	0.87037	0.0506332	0.124223	1	1	22.4007	-80.0792	22.5682	-80.2214	1002.38	688.297	115.65	115.188	115.223	115.206	3.34345	2.42288	2.32154	2.69596	59.6	42.974	1443.02	7890.79	0.37851	0	Post-Orogenic	Carbonate Sedimentary Rocks	3	0	0	0	0
CAM2022_CU-120	S300WTS020	CU-120	Campbell	2022	10.5194/gchron-4-435-2022	523256	12977	2430891	74049	4.6457	0.0392807	3.47	0.0935	0.241	5.15	0.175	0.524	0.673786	0.0433673	0.123192	1	1	22.488	-80.4974	22.4418	-80.4836	1010.12	55.4609	50	49.5516	49.6	49.5758	1.40366	1.12439	1.18246	1.23684	24.0316	3.67187	1497.64	8208.26	0.429415	0	Post-Orogenic	Carbonate Sedimentary Rocks	1	0	0	0	0
CAM2022_CU-121	S300WTS021	CU-121	Campbell	2022	10.5194/gchron-4-435-2022	740745	14266	3269157	95182	4.41334	0.0349085	2.32	0.0505	0.163	3.61	0.122	0.382	0.642659	0.0401985	0.127018	1	1	22.5008	-80.4355	22.4439	-80.4459	1009.52	49.3806	54.85	54.2653	54.3654	54.3153	1.24919	1.07192	0.985129	1.10208	21.563	2.80548	1501.08	8239.52	0.431277	0	Post-Orogenic	Carbonate Sedimentary Rocks	1	0	0	0	0
CAM2022_CU-122	S300WTS022	CU-122	Campbell	2022	10.5194/gchron-4-435-2022	794719	7239	4014877	60915	5.05195	0.0176966	2.17	0.0225	0.147	2.83	0.0519	0.299	0.766784	0.0210674	0.125506	1	1	22.5075	-80.2758	22.4994	-80.29	1007.81	3.66362	69.62	68.2857	70	69.1429	0.938192	0.782064	0.861346	0.860534	16.8966	2.24906	1512.5	8311.75	NaN	0	Post-Orogenic	Carbonate Sedimentary Rocks	1	0	0	0	0
CAM2022_CU-131	S300WTS024	CU-131	Campbell	2022	10.5194/gchron-4-435-2022	812522	18758	3656186	130861	4.4998	0.0425912	2.1	0.0554	0.152	3.17	0.135	0.35	0.662461	0.0500958	0.13202	1	1	22.3413	-80.3772	22.3563	-80.5092	1008.26	175.033	65.04	64.627	64.6307	64.6288	1.07528	0.958632	1.09725	1.04372	22.9757	4.17717	1462.04	7931.14	0.464658	0	Post-Orogenic	Basic Volcanic Rocks	2	0	0	0	0
CAM2022_CU-132	S300WTS025	CU-132	Campbell	2022	10.5194/gchron-4-435-2022	1258837	10122	5851985	85379	4.64872	0.0166588	1.23	0.0123	0.0915	1.71	0.0336	0.202	0.719298	0.0220474	0.1396	1	1	22.4839	-80.2678	22.4922	-80.297	1007.52	21.9574	72.96	72.8	72.913	72.8565	0.969907	0.965037	1.03426	0.989735	20.6229	2.84365	1514.29	8325.07	0.419822	0	Post-Orogenic	Carbonate Sedimentary Rocks	1	0	0	0	0
CAZ2019_BAN1.s	S252WTS001	BAN1.s	Cazes	2019	10.1002/esp.4744	669891	22462.2	3.4853e+06	197714	5.20279	0.0658968	3.4	0.124	0.251	4.37	0.282	0.512	0.778032	0.0741238	0.138481	1	1	-15.3889	127.109	-15.2713	126.92	967.35	815.558	376.96	376.678	376.876	376.777	3.66434	3.42475	3.44311	3.51073	71.2378	26.0741	965.084	3887.67	0.833827	0	Post-Orogenic	Siliciclastic Sedimentary Rocks	3	0	0	0	0
CAZ2019_BET1.s	S252WTS002	BET1.s	Cazes	2019	10.1002/esp.4744	794581	27665.1	3.67618e+06	322535	4.62656	0.0943924	2.37	0.093	0.183	3.46	0.356	0.498	0.684971	0.110119	0.163335	1	1	-14.3969	127.129	-14.2724	127.308	987.69	913.338	196.06	196.031	195.801	195.916	2.20657	2.35979	2.37355	2.3133	49.4718	21.0088	1110.59	4621.59	0.736485	0	Post-Orogenic	Siliciclastic Sedimentary Rocks	3	0	0	0	0
CAZ2019_BIN1.s	S252WTS003	BIN1.s	Cazes	2019	10.1002/esp.4744	526784	17529.8	2.73971e+06	226203	5.20083	0.0890183	4.1	0.146	0.298	5.33	0.489	0.706	0.769231	0.0984133	0.151089	1	1	-15.8764	127.599	-15.7137	127.833	978.99	889.899	271.53	271.53	272.333	271.931	6.91202	7.2497	7.54012	7.23395	144.433	50.8115	887.464	3300.35	0.893926	0	Post-Orogenic	Siliciclastic Sedimentary Rocks	3	0	0	0	0
CAZ2019_CHB1.s	S252WTS004	CHB1.s	Cazes	2019	10.1002/esp.4744	562122	19977.5	2.998e+06	171706	5.33337	0.067404	4.54	0.172	0.333	5.73	0.362	0.654	0.792321	0.0736651	0.135672	1	1	-16.7049	127.501	-15.9734	127.927	956.17	3048.99	473.59	473.536	473.795	473.665	9.15204	8.70673	7.90039	8.58639	166.877	68.3478	738.569	2721.1	0.916424	0	Post-Orogenic	Siliciclastic Sedimentary Rocks	5	0	0	0	0
CAZ2019_CRS1.s	S252WTS005	CRS1.s	Cazes	2019	10.1002/esp.4744	435543	14033.7	2.43964e+06	185241	5.60138	0.0824834	5.16	0.176	0.367	6.2	0.516	0.78	0.832258	0.089944	0.14452	1	0	-15.1056	126.631	-14.7922	126.792	975.87	1263.48	298.79	298.519	299.096	298.808	5.72666	5.46367	5.53043	5.57359	109.16	44.6666	1085.61	4475.2	0.75851	0	Post-Orogenic	Basic Volcanic Rocks	3	0	0	0	0
CAZ2019_CRSG1.s	S252WTS006	CRSG1.s	Cazes	2019	10.1002/esp.4744	488228	17366	2.50558e+06	172493	5.132	0.0774894	4.37	0.166	0.322	5.78	0.439	0.703	0.756055	0.0849211	0.142205	1	1	-15.0195	126.83	-15.0044	126.816	981.08	13.6069	253	254.526	249.385	251.955	5.64098	8.17699	9.50622	7.77473	160.788	16.0796	1069.5	4390.56	NaN	0	Post-Orogenic	Siliciclastic Sedimentary Rocks	3	0	0	0	0
CAZ2019_CRSG2.s	S252WTS007	CRSG2.s	Cazes	2019	10.1002/esp.4744	284132	9528.19	1.43511e+06	175651	5.05087	0.126906	7.8	0.272	0.55	10.7	1.38	1.69	0.728972	0.133603	0.172969	1	1	-15.0876	126.781	-15.0532	126.803	983.29	29.3978	233.25	232.913	234.897	233.905	8.72763	10.3489	9.51179	9.52946	159.477	21.9261	1058	4340.97	0.756119	0	Post-Orogenic	Basic Volcanic Rocks	3	0	0	0	0
CAZ2019_DMP1.s	S252WTS008	DMP1.s	Cazes	2019	10.1002/esp.4744	992371	34885.6	4.9776e+06	481115	5.01587	0.10285	2.2	0.0881	0.172	2.89	0.336	0.451	0.761246	0.122966	0.174544	1	0	-15.5596	126.908	-15.3422	126.877	964.99	964.194	397.43	397.452	397.393	397.423	2.3886	2.64477	2.91923	2.65087	56.181	20.3312	959.032	3851.53	0.825019	0	Post-Orogenic	Unconsolidated Sediments	3	0	0	0	0
CAZ2019_DRY1.s	S252WTS009	DRY1.s	Cazes	2019	10.1002/esp.4744	845962	26112.3	4.08878e+06	271403	4.8333	0.0732034	2.67	0.0918	0.198	3.71	0.286	0.468	0.719677	0.0844087	0.146328	1	1	-15.5143	126.566	-14.6118	126.929	963.96	13941	403.89	403.779	403.793	403.786	3.22489	3.28621	3.30645	3.27252	69.4663	35.804	987.857	3991.2	0.818557	0	Post-Orogenic	Siliciclastic Sedimentary Rocks	5	0	0	0	0
CAZ2019_DRY2.s	S252WTS010	DRY2.s	Cazes	2019	10.1002/esp.4744	892191	28195.5	4.62519e+06	304649	5.18408	0.0730564	2.6	0.0917	0.194	3.3	0.257	0.423	0.787879	0.0854928	0.148317	1	1	-15.87	126.362	-15.3525	126.824	960.03	9302.73	442.71	442.644	442.71	442.677	3.06645	3.12048	3.08058	3.08917	65.9798	37.1358	972.795	3908.62	0.824105	0	Post-Orogenic	Siliciclastic Sedimentary Rocks	5	0	0	0	0
CAZ2019_DRY3.s	S252WTS011	DRY3.s	Cazes	2019	10.1002/esp.4744	822634	24718.9	4.51318e+06	268287	5.48625	0.0666081	2.94	0.0975	0.215	3.52	0.244	0.43	0.835227	0.0768428	0.142375	1	1	-15.8839	126.075	-15.6853	126.379	956.06	3094.54	477.96	477.935	477.9	477.918	4.02091	3.87224	3.62057	3.83791	84.1255	50.9456	1029.07	4165.75	0.802347	0	Post-Orogenic	Siliciclastic Sedimentary Rocks	4	0	0	0	0
CAZ2019_DUN1.s	S252WTS012	DUN1.s	Cazes	2019	10.1002/esp.4744	317563	12111.4	1.70238e+06	103399	5.36077	0.0717191	6.96	0.277	0.51	8.88	0.575	0.997	0.783784	0.0760053	0.134071	1	1	-16.2174	128.272	-15.786	128.68	983.53	4139.8	227.22	226.819	226.32	226.57	11.6561	9.22369	8.69849	9.85941	194.095	84.387	754.682	2838.25	0.904252	0	Post-Orogenic	Siliciclastic Sedimentary Rocks	9	0	0	0	0
CAZ2019_DUR1.s	S252WTS013	DUR1.s	Cazes	2019	10.1002/esp.4744	724292	24165.5	3.94196e+06	285349	5.4425	0.0797065	3.34	0.121	0.247	4.06	0.337	0.523	0.82266	0.0905663	0.148536	1	0	-16.6006	127.009	-15.9416	127.218	959.29	8798.52	449.46	449.264	449.309	449.286	4.33245	4.04232	4.133	4.16926	85.1118	38.1075	753.109	2814.93	0.935555	0	Post-Orogenic	Siliciclastic Sedimentary Rocks	4	0	0	0	0
CAZ2019_DWN1.s	S252WTS014	DWN1.s	Cazes	2019	10.1002/esp.4744	649814	22342.8	3.30228e+06	189362	5.08189	0.0668611	3.57	0.133	0.265	4.74	0.306	0.551	0.753165	0.0745354	0.137923	1	1	-16.0848	126.902	-15.9909	127.026	965.94	431.302	390.38	390.141	389.665	389.903	4.2967	4.23223	4.5122	4.34704	91.1776	43.3793	832.174	3224.1	0.916795	0	Post-Orogenic	Siliciclastic Sedimentary Rocks	2	0	0	0	0
CAZ2019_GIB1.s	S252WTS015	GIB1.s	Cazes	2019	10.1002/esp.4744	984249	35540.1	5.20769e+06	291004	5.29103	0.0665311	2.46	0.0996	0.191	3.03	0.203	0.372	0.811881	0.0782804	0.145263	1	1	-16.2857	126.434	-16.0964	126.511	953.23	949.151	506.17	506.234	506.383	506.309	2.88449	3.16282	3.19994	3.08242	63.5567	25.7116	845.936	3283.35	0.888508	0	Post-Orogenic	Siliciclastic Sedimentary Rocks	4	0	0	0	0
CAZ2019_HAN1.s	S252WTS016	HAN1.s	Cazes	2019	10.1002/esp.4744	1.12259e+06	36513.7	5.37642e+06	302497	4.78931	0.0649889	2.25	0.083	0.172	3.12	0.209	0.382	0.721154	0.0764727	0.144341	1	1	-16.3108	126.184	-16.5137	126.357	945.1	915.998	579.46	579.352	579.105	579.229	2.87324	3.19792	3.30204	3.1244	67.1993	27.7491	917.967	3608.92	0.827936	0	Post-Orogenic	Siliciclastic Sedimentary Rocks	4	0	0	0	0
CAZ2019_JHN1.s	S252WTS017	JHN1.s	Cazes	2019	10.1002/esp.4744	643549	23452	3.37863e+06	268354	5.24999	0.0873879	3.34	0.133	0.253	4.25	0.385	0.568	0.785882	0.098954	0.153621	1	1	-14.8559	127.11	-14.6818	127.002	975.14	678.207	304.58	304.329	304.232	304.281	4.13941	4.00936	3.92578	4.02485	80.9688	30.1523	1052.5	4365.27	0.794406	0	Post-Orogenic	Siliciclastic Sedimentary Rocks	3	0	0	0	0
CAZ2019_KED1.s	S252WTS018	KED1.s	Cazes	2019	10.1002/esp.4744	1.18051e+06	35686.6	6.52212e+06	460585	5.52482	0.0768171	1.88	0.0659	0.145	2.14	0.193	0.305	0.878505	0.0967595	0.162054	1	0	-15.4419	126.094	-15.3684	126.148	959.26	337.063	450.72	450.859	450.577	450.718	1.89055	2.15492	2.0973	2.04759	44.3564	10.7543	1155.4	4784.96	0.701335	0	Post-Orogenic	Siliciclastic Sedimentary Rocks	3	0	0	0	0
CAZ2019_KED2.s	S252WTS019	KED2.s	Cazes	2019	10.1002/esp.4744	1.06964e+06	32463.8	5.36875e+06	341871	5.01919	0.0705409	2.06	0.0715	0.156	2.67	0.208	0.35	0.771536	0.0852849	0.151388	1	1	-15.3219	126.132	-15.1176	126.127	962.51	783.985	420.41	420.422	420.429	420.425	2.23111	2.29642	2.34349	2.29034	48.6993	13.128	1179.08	4886.72	0.706791	0	Post-Orogenic	Siliciclastic Sedimentary Rocks	3	0	0	0	0
CAZ2019_KED3.s	S252WTS020	KED3.s	Cazes	2019	10.1002/esp.4744	1.02543e+06	34272.4	4.99508e+06	341423	4.8712	0.0760857	2.09	0.0798	0.162	2.82	0.234	0.376	0.741135	0.0913418	0.154227	1	1	-15.2019	126.124	-14.8999	126.202	966.76	1457.59	381.97	381.881	382.031	381.956	2.46324	2.50255	2.54878	2.50486	52.2658	15.6835	1239.59	5127.97	0.703239	0	Post-Orogenic	Siliciclastic Sedimentary Rocks	3	0	0	0	0
CAZ2019_KIN1.s	S252WTS021	KIN1.s	Cazes	2019	10.1002/esp.4744	446029	17741.8	2.4887e+06	143068	5.57968	0.0699073	4.74	0.201	0.359	5.71	0.362	0.652	0.830123	0.0762721	0.137021	1	1	-16.0201	128.177	-15.9119	128.184	984.66	522.207	219.36	219.349	218.923	219.136	10.8889	8.42585	8.33465	9.21647	189.94	83.4551	799.075	2999.53	0.916585	0	Post-Orogenic	Siliciclastic Sedimentary Rocks	4	0	0	0	0
CAZ2019_KNG1.s	S252WTS022	KNG1.s	Cazes	2019	10.1002/esp.4744	684626	23376.7	3.31986e+06	255197	4.84915	0.0841123	2.9	0.109	0.218	4.04	0.356	0.535	0.717822	0.0958	0.152274	1	1	-14.544	127.279	-14.2845	127.327	984.02	1353.12	228.12	228.088	228.031	228.06	2.68308	2.65344	2.61233	2.64962	55.7429	15.9587	1066.66	4395.72	0.771114	0	Post-Orogenic	Siliciclastic Sedimentary Rocks	2	0	0	0	0
CAZ2019_MRG1.s	S252WTS023	MRG1.s	Cazes	2019	10.1002/esp.4744	721147	26552	3.66842e+06	258033	5.08693	0.0793928	2.92	0.119	0.224	3.83	0.311	0.492	0.762402	0.090854	0.149622	1	1	-14.9931	126.46	-14.7923	126.749	975.95	2284.99	299.11	299.262	299.249	299.256	3.25964	3.10504	3.18099	3.18189	67.5582	36.5049	1196.43	4958.3	0.709368	0	Post-Orogenic	Siliciclastic Sedimentary Rocks	4	0	0	0	0
CAZ2019_PEN1.s	S252WTS024	PEN1.s	Cazes	2019	10.1002/esp.4744	602001	19792	3.27276e+06	230418	5.43648	0.0777027	4	0.141	0.291	4.92	0.388	0.613	0.813008	0.0863814	0.144278	1	1	-16.6107	127.6	-15.7964	127.881	962.85	7692.51	414.67	414.439	414.462	414.451	8.22871	7.49074	7.03152	7.58366	150.524	79.3795	787.058	2937.07	0.920751	0	Post-Orogenic	Siliciclastic Sedimentary Rocks	6	0	0	0	0
CAZ2019_PLN1.s	S252WTS025	PLN1.s	Cazes	2019	10.1002/esp.4744	1.15515e+06	35317.4	5.40614e+06	409884	4.68005	0.0817507	1.98	0.0698	0.152	2.81	0.258	0.39	0.704626	0.09835	0.158606	1	1	-16.0507	126.303	-16.0151	126.449	956.53	396.037	475.51	475.512	477.002	476.257	2.2894	2.55129	2.64717	2.49595	54.6659	36.9831	929.789	3698.64	0.837382	0	Post-Orogenic	Siliciclastic Sedimentary Rocks	3	0	0	0	0
CAZ2019_RUS1.s	S252WTS026	RUS1.s	Cazes	2019	10.1002/esp.4744	1.16751e+06	41000.4	5.30599e+06	296614	4.54472	0.0660172	1.94	0.0788	0.154	2.85	0.193	0.354	0.680702	0.0789669	0.14741	1	1	-16.1736	126.702	-16.0515	126.7	957.55	445.559	466.73	466.685	466.732	466.708	1.911	2.10261	2.14275	2.05212	46.7894	22.362	828.958	3206.4	0.909469	0	Post-Orogenic	Siliciclastic Sedimentary Rocks	2	0	0	0	0
CAZ2019_WHS1.s	S252WTS027	WHS1.s	Cazes	2019	10.1002/esp.4744	886462	29447.7	4.51122e+06	254287	5.08902	0.0654281	2.63	0.0973	0.198	3.42	0.226	0.413	0.769006	0.0757333	0.142306	1	1	-15.6516	126.064	-15.7096	126.217	959.48	631.468	448.38	448.307	448.008	448.158	3.78695	3.69642	3.52332	3.6689	81.6912	51.8417	1088.34	4465.37	0.754276	0	Post-Orogenic	Siliciclastic Sedimentary Rocks	3	0	0	0	0
CLA2000_NY-18A	S006WTS002	NY-18A	Clapp	2000	10.1130/0091-7613(2000)28<995:SYESPI>2.0.CO;2	108504	6329	861000	78000	7.93519	0.107747	25.7	1.51	2.15	22.2	2.07	2.85	1.15766	0.110211	0.153231	2	0	29.5803	34.9373	29.5826	34.9374	980.84	0.0971934	277.4	255.306	203.462	229.384	8.64535	12.3262	18.0385	13.0034	301	3	19	72	NaN	110.248	Active	Unconsolidated Sediments	1	0	0	0	0
CLA2000_NY-18B	S006WTS003	NY-18B	Clapp	2000	10.1130/0091-7613(2000)28<995:SYESPI>2.0.CO;2	114833	6329	818000	48000	7.12339	0.0805044	24.2	1.35	1.98	23.5	1.41	2.51	1.02979	0.0819267	0.134545	0	0	29.5803	34.9373	29.5826	34.9374	980.84	0.0971934	277.4	255.306	203.462	229.384	8.64535	12.3262	18.0385	13.0034	301	3	19	72	NaN	110.248	Active	Unconsolidated Sediments	1	0	0	0	0
CLA2000_NY-18C1	S006WTS004	NY-18C1	Clapp	2000	10.1130/0091-7613(2000)28<995:SYESPI>2.0.CO;2	128396	8138	859000	54000	6.69024	0.08927	21.5	1.38	1.89	22.3	1.44	2.44	0.964126	0.0910475	0.140356	0	0	29.5803	34.9373	29.5826	34.9374	980.84	0.0971934	277.4	255.306	203.462	229.384	8.64535	12.3262	18.0385	13.0034	301	3	19	72	NaN	110.248	Active	Unconsolidated Sediments	1	0	0	0	0
CLA2000_NY-18C2	S006WTS005	NY-18C2	Clapp	2000	10.1130/0091-7613(2000)28<995:SYESPI>2.0.CO;2	143768	6329	927000	59000	6.44789	0.0773873	19.1	0.856	1.43	20.6	1.35	2.27	0.927184	0.079393	0.133222	0	0	29.5803	34.9373	29.5826	34.9374	980.84	0.0971934	277.4	255.306	203.462	229.384	8.64535	12.3262	18.0385	13.0034	301	3	19	72	NaN	110.248	Active	Unconsolidated Sediments	1	0	0	0	0
CLA2000_NY-19A	S006WTS006	NY-19A	Clapp	2000	10.1130/0091-7613(2000)28<995:SYESPI>2.0.CO;2	108504	7234	832000	84000	7.66792	0.120988	25.3	1.7	2.28	22.7	2.35	3.09	1.11454	0.123419	0.163251	0	0	29.5827	34.9377	29.5852	34.9402	983.26	0.202486	264.89	245.849	197.307	221.578	9.23425	12.2794	17.0042	12.8393	295	8.83176	18.6031	70.4124	NaN	110.248	Active	Unconsolidated Sediments	1	0	0	0	0
CLA2000_NY-19B	S006WTS007	NY-19B	Clapp	2000	10.1130/0091-7613(2000)28<995:SYESPI>2.0.CO;2	118450	5425	778000	47000	6.56817	0.07581	23	1.07	1.74	24.4	1.51	2.63	0.942623	0.0774213	0.131686	0	0	29.5827	34.9377	29.5852	34.9402	983.26	0.202486	264.89	245.849	197.307	221.578	9.23425	12.2794	17.0042	12.8393	295	8.83176	18.6031	70.4124	NaN	110.248	Active	Unconsolidated Sediments	1	0	0	0	0
CLA2000_NY-19C	S006WTS008	NY-19C	Clapp	2000	10.1130/0091-7613(2000)28<995:SYESPI>2.0.CO;2	107600	6329	923000	65000	8.57807	0.0917556	25.5	1.52	2.15	20.3	1.47	2.33	1.25616	0.0937915	0.142418	2	2	29.5827	34.9377	29.5852	34.9402	983.26	0.202486	264.89	245.849	197.307	221.578	9.23425	12.2794	17.0042	12.8393	295	8.83176	18.6031	70.4124	NaN	110.248	Active	Unconsolidated Sediments	1	0	0	0	0
CLA2000_NY-20A1	S006WTS009	NY-20A1	Clapp	2000	10.1130/0091-7613(2000)28<995:SYESPI>2.0.CO;2	113025	4521	826000	49000	7.30812	0.0715479	24.2	0.98	1.75	22.9	1.39	2.45	1.05677	0.0729674	0.129134	0	0	29.5827	34.9398	29.5884	34.944	983.26	0.445469	249.58	232.758	192.643	212.7	12.5217	13.5463	16.612	14.2267	284.375	13.2376	18.179	68.7216	NaN	110.248	Active	Unconsolidated Sediments	1	0	0	0	0
CLA2000_NY-20B	S006WTS011	NY-20B	Clapp	2000	10.1130/0091-7613(2000)28<995:SYESPI>2.0.CO;2	111217	4521	816000	45000	7.33701	0.0685102	24.6	1.01	1.79	23.2	1.31	2.43	1.06034	0.0698142	0.127536	0	0	29.5827	34.9398	29.5884	34.944	983.26	0.445469	249.58	232.758	192.643	212.7	12.5217	13.5463	16.612	14.2267	284.375	13.2376	18.179	68.7216	NaN	110.248	Active	Unconsolidated Sediments	1	0	0	0	0
CLA2000_NY-20C	S006WTS012	NY-20C	Clapp	2000	10.1130/0091-7613(2000)28<995:SYESPI>2.0.CO;2	107600	4521	802000	60000	7.45353	0.0858043	25.5	1.08	1.87	23.6	1.81	2.76	1.08051	0.0876121	0.138039	0	0	29.5827	34.9398	29.5884	34.944	983.26	0.445469	249.58	232.758	192.643	212.7	12.5217	13.5463	16.612	14.2267	284.375	13.2376	18.179	68.7216	NaN	110.248	Active	Unconsolidated Sediments	1	0	0	0	0
CLA2000_NY-4	S006WTS001	NY-4	Clapp	2000	10.1130/0091-7613(2000)28<995:SYESPI>2.0.CO;2	119354	9042	896000	76000	7.50708	0.113727	22.8	1.75	2.22	21	1.83	2.61	1.08571	0.116125	0.157885	0	0	29.5827	34.9394	29.5867	34.9421	983.26	0.396872	251.37	240.031	193.456	216.744	11.7348	13.1601	16.7167	13.8706	290.333	8.21922	18.3234	69.2997	NaN	110.248	Active	Unconsolidated Sediments	1	0	0	0	0
CLA2001_ECAC-10	S012WTS003	ECAC-10	Clapp	2001	10.1006/qres.2000.2211	179032	8138	1.21936e+06	104373	6.81083	0.0969176	58.7	2.68	4.39	59.7	5.16	7.31	0.98325	0.0977496	0.143478	0	0	35.7031	-107.107	35.6985	-107.102	801.52	2.25922	1979.5	1976.22	1984	1980.11	5.7746	7.23542	6.98483	6.66495	116.474	6.97641	282.75	1513.5	NaN	2.7614	Active	Siliciclastic Sedimentary Rocks	1	0	0	0	0
CLA2001_ECAC-11-1	S012WTS004	ECAC-11-1	Clapp	2001	10.1006/qres.2000.2211	117546	9042	704741	52786.9	5.99545	0.107366	89.1	6.87	8.66	103	7.73	11.8	0.865049	0.107598	0.150238	1	0	35.7055	-107.099	35.7037	-107.107	800.12	8.20885	1950.39	1950.75	1951	1950.88	4.89709	4.30279	4.45132	4.5504	108.031	16.5942	280.333	1486.17	NaN	2.82086	Active	Siliciclastic Sedimentary Rocks	1	0	0	0	0
CLA2001_ECAC-11-2	S012WTS005	ECAC-11-2	Clapp	2001	10.1006/qres.2000.2211	108504	7234	705848	60675.1	6.50527	0.108785	96.1	6.43	8.58	102	8.85	12.5	0.942157	0.109567	0.151623	0	0	35.7055	-107.099	35.7037	-107.107	800.12	8.20885	1950.39	1950.75	1951	1950.88	4.89709	4.30279	4.45132	4.5504	108.031	16.5942	280.333	1486.17	NaN	2.82086	Active	Siliciclastic Sedimentary Rocks	1	0	0	0	0
CLA2001_ECAC-11-3	S012WTS006	ECAC-11-3	Clapp	2001	10.1006/qres.2000.2211	97654	18988	597876	51808.3	6.12239	0.212877	106	20.7	21.7	120	10.5	14.8	0.883333	0.21399	0.238998	0	0	35.7055	-107.099	35.7037	-107.107	800.12	8.20885	1950.39	1950.75	1951	1950.88	4.89709	4.30279	4.45132	4.5504	108.031	16.5942	280.333	1486.17	NaN	2.82086	Active	Siliciclastic Sedimentary Rocks	1	0	0	0	0
CLA2001_ECAC-8-2	S012WTS001	ECAC-8-2	Clapp	2001	10.1006/qres.2000.2211	157331	8138	1.00726e+06	105425	6.40217	0.116749	64.8	3.37	5.11	70.1	7.4	9.58	0.924394	0.117679	0.157782	0	0	35.6886	-107.11	35.669	-107.091	805.41	0.307811	2007.44	2005.25	2005.83	2005.54	6.22323	5.29235	2.99402	4.83653	112	2.09762	286.491	1538.78	NaN	2.80535	Active	Siliciclastic Sedimentary Rocks	1	0	0	0	0
CLA2001_ECAC-9	S012WTS002	ECAC-9	Clapp	2001	10.1006/qres.2000.2211	122067	5425	843952	58421.5	6.91384	0.0822623	84.6	3.77	6.27	85	5.93	9.45	0.995294	0.0827825	0.133615	0	0	35.7006	-107.106	35.6924	-107.101	802.44	0.937634	1992.18	1986.25	1987.95	1987.1	6.54936	7.7021	5.41636	6.55594	111.812	4.48914	285.5	1532.5	NaN	2.79704	Active	Siliciclastic Sedimentary Rocks	1	0	0	0	0
CLA2002_YPG12A	S014WTS011	YPG12A	Clapp	2002	10.1016/S0169-555X(01)00191-X	125684	9042	912000	70000	7.25629	0.1052	22.9	1.67	2.16	21.9	1.72	2.59	1.04566	0.107175	0.151273	0	0	33.0722	-114.573	33.0762	-114.572	984.77	0.477133	254.59	253.333	237.337	245.335	10.1955	6.30061	4.77643	7.09083	168.143	12.1471	104.178	359.907	NaN	31.5233	Active	Acid Plutonic Rocks	1	0	0	0	0
CLA2002_YPG12B	S014WTS012	YPG12B	Clapp	2002	10.1016/S0169-555X(01)00191-X	124780	6329	930000	60000	7.45312	0.0820669	23.1	1.19	1.82	21.4	1.42	2.37	1.07944	0.0840049	0.135914	0	0	33.0722	-114.573	33.0762	-114.572	984.77	0.477133	254.59	253.333	237.337	245.335	10.1955	6.30061	4.77643	7.09083	168.143	12.1471	104.178	359.907	NaN	31.5233	Active	Acid Plutonic Rocks	1	0	0	0	0
CLA2002_YPG12C	S014WTS013	YPG12C	Clapp	2002	10.1016/S0169-555X(01)00191-X	119354	8138	869000	104000	7.28086	0.137738	24.2	1.67	2.21	23.1	2.83	3.48	1.04762	0.14061	0.176168	0	0	33.0722	-114.573	33.0762	-114.572	984.77	0.477133	254.59	253.333	237.337	245.335	10.1955	6.30061	4.77643	7.09083	168.143	12.1471	104.178	359.907	NaN	31.5233	Active	Acid Plutonic Rocks	1	0	0	0	0
CLA2002_YPG13A	S014WTS014	YPG13A	Clapp	2002	10.1016/S0169-555X(01)00191-X	122971	9946	943000	66000	7.66847	0.106959	23.7	1.94	2.4	21.3	1.53	2.42	1.11268	0.108904	0.152194	2	0	33.0771	-114.577	33.0772	-114.57	983.72	2.17698	256.66	255	249.5	252.25	9.97154	5.9975	4.41894	6.79599	154.972	16.3188	104.5	360.75	NaN	31.5233	Active	Acid Plutonic Rocks	1	0	0	0	0
CLA2002_YPG13B	S014WTS015	YPG13B	Clapp	2002	10.1016/S0169-555X(01)00191-X	142864	7234	896000	49000	6.2717	0.0745297	20.2	1.04	1.6	22.5	1.26	2.35	0.897778	0.0760705	0.131082	1	0	33.0771	-114.577	33.0772	-114.57	983.72	2.17698	256.66	255	249.5	252.25	9.97154	5.9975	4.41894	6.79599	154.972	16.3188	104.5	360.75	NaN	31.5233	Active	Acid Plutonic Rocks	1	0	0	0	0
CLA2002_YPG14A	S014WTS017	YPG14A	Clapp	2002	10.1016/S0169-555X(01)00191-X	108504	7234	850000	62000	7.83381	0.0988198	26.8	1.81	2.42	23.7	1.77	2.73	1.1308	0.100692	0.146364	2	0	33.0779	-114.573	33.0861	-114.558	984.52	3.53796	247.97	246.4	244	245.2	11.3368	6.06294	5.30417	7.56798	157.103	16.6482	103.6	357.6	NaN	31.5233	Active	Acid Plutonic Rocks	1	0	0	0	0
CLA2002_YPG14B	S014WTS018	YPG14B	Clapp	2002	10.1016/S0169-555X(01)00191-X	117546	4521	743000	71000	6.32093	0.103008	24.7	0.961	1.76	27.3	2.67	3.59	0.904762	0.105257	0.149566	0	0	33.0779	-114.573	33.0861	-114.558	984.52	3.53796	247.97	246.4	244	245.2	11.3368	6.06294	5.30417	7.56798	157.103	16.6482	103.6	357.6	NaN	31.5233	Active	Acid Plutonic Rocks	1	0	0	0	0
CLA2002_YPG14C	S014WTS019	YPG14C	Clapp	2002	10.1016/S0169-555X(01)00191-X	110312	5425	811000	50000	7.35187	0.0788641	26.4	1.31	2.05	24.9	1.57	2.7	1.06024	0.0802362	0.13337	0	0	33.0779	-114.573	33.0861	-114.558	984.52	3.53796	247.97	246.4	244	245.2	11.3368	6.06294	5.30417	7.56798	157.103	16.6482	103.6	357.6	NaN	31.5233	Active	Acid Plutonic Rocks	1	0	0	0	0
CLA2002_YPG16A	S014WTS029	YPG16A	Clapp	2002	10.1016/S0169-555X(01)00191-X	75953	4521	469000	39000	6.17487	0.102264	39.2	2.35	3.31	44.9	3.78	5.44	0.873051	0.103351	0.147679	1	0	33.142	-114.529	33.1075	-114.524	982.76	7.22937	255.35	260.333	237.5	248.917	13.6711	6.08613	6.81696	8.85806	178.298	43.051	107.667	372.778	NaN	14.1227	Active	Acid Volcanic Rocks	1	0	0	0	0
CLA2002_YPG17A	S014WTS030	YPG17A	Clapp	2002	10.1016/S0169-555X(01)00191-X	139247	5425	893000	55000	6.41306	0.0728779	22.2	0.876	1.59	24.1	1.52	2.62	0.921162	0.0743972	0.130186	1	0	33.1982	-114.499	33.1169	-114.505	974.12	102.624	236.13	336.723	336.5	336.612	6.93036	6.83669	6.54746	6.7715	171.232	90.5638	118.764	412.021	0.901651	8.5269	Active	Unconsolidated Sediments	3	0	0	0	0
CLA2002_YPG18A	S014WTS031	YPG18A	Clapp	2002	10.1016/S0169-555X(01)00191-X	141055	5425	942000	54000	6.67825	0.0690313	21.4	0.833	1.53	22.2	1.31	2.36	0.963964	0.0706911	0.128112	0	0	33.1944	-114.476	33.1457	-114.499	977.81	29.0789	304.75	306.873	306.036	306.454	6.21406	4.44891	4.54623	5.06973	118.827	62.8246	115.881	400.095	0.902165	8.33347	Active	Unconsolidated Sediments	2	0	0	0	0
CLA2002_YPG19A	S014WTS023	YPG19A	Clapp	2002	10.1016/S0169-555X(01)00191-X	160043	9042	1119000	90000	6.99187	0.0982892	19.8	1.13	1.64	19.6	1.62	2.37	1.0102	0.100442	0.146567	0	0	33.217	-114.509	33.1547	-114.516	969.81	59.5231	447.1	374.442	372.2	373.321	17.4295	8.0384	7.85646	11.1081	202.658	96.7822	122.952	427.928	0.897841	7.68038	Active	Acid Volcanic Rocks	2	0	0	0	0
CLA2002_YPG20A	S014WTS032	YPG20A	Clapp	2002	10.1016/S0169-555X(01)00191-X	173606	9946	1155000	79000	6.653	0.0892219	17.2	1	1.44	17.9	1.26	2.03	0.960894	0.0912968	0.140963	0	0	33.1753	-114.539	33.1634	-114.522	977.97	3.64505	306.94	308.929	317	312.964	11.5399	7.67507	6.488	8.56766	205.271	32.6698	114.667	396.833	NaN	14.1227	Active	Acid Volcanic Rocks	2	0	0	0	0
CLA2002_YPG21A	S014WTS033	YPG21A	Clapp	2002	10.1016/S0169-555X(01)00191-X	198020	7234	1434000	84000	7.24169	0.0690353	16.1	0.6	1.14	15.3	0.929	1.65	1.05229	0.0712434	0.129011	0	0	33.2292	-114.512	33.1768	-114.517	967.49	34.5961	322.06	395.603	388.571	392.087	8.23074	7.8781	7.46418	7.85767	203.892	100.818	125.816	438.49	0.903992	5.86096	Active	Unconsolidated Sediments	2	0	0	0	0
CLA2002_YPG22A	S014WTS034	YPG22A	Clapp	2002	10.1016/S0169-555X(01)00191-X	138343	12659	910000	117000	6.57785	0.157809	21.9	2.03	2.41	23.1	3.05	3.67	0.948052	0.161324	0.193264	0	0	33.185	-114.532	33.1697	-114.52	977.3	3.81353	306.79	307.6	303	305.3	7.943	5.67442	5.84282	6.48675	147.492	22.6155	113.2	391.4	NaN	13.9221	Active	Acid Volcanic Rocks	2	0	0	0	0
CLA2002_YPG27	S014WTS035	YPG27	Clapp	2002	10.1016/S0169-555X(01)00191-X	150097	8138	1039000	53000	6.92219	0.0744426	21.3	1.17	1.73	21.3	1.12	2.19	1	0.0760404	0.131027	0	0	33.2174	-114.489	33.169	-114.514	968.64	15.2097	378.57	379.415	386.4	382.908	13.648	9.49987	9.80804	10.9853	222.112	106.302	123.455	430.045	0.888672	7.75754	Active	Acid Volcanic Rocks	2	0	0	0	0
CLA2002_YPG28	S014WTS036	YPG28	Clapp	2002	10.1016/S0169-555X(01)00191-X	195307	9042	1422000	73000	7.28085	0.0691285	16.8	0.794	1.29	15.9	0.846	1.65	1.0566	0.0711669	0.129093	0	0	33.243	-114.51	33.2069	-114.519	963.14	22.3678	435.63	434.483	432.524	433.503	15.2915	9.33746	8.30564	10.9782	242.15	100.702	131.1	458.5	0.904416	4.65451	Active	Acid Volcanic Rocks	2	0	0	0	0
CLA2002_YPG2A	S014WTS001	YPG2A	Clapp	2002	10.1016/S0169-555X(01)00191-X	100366	8138	654000	35000	6.51615	0.0971522	30	2.45	3.03	32.2	1.75	3.32	0.931677	0.0980976	0.144332	0	0	33.1596	-114.52	33.0401	-114.522	980.41	186.707	280.76	281.584	279.67	280.627	10.0962	6.94244	6.81293	7.95051	169.527	72.7819	111.806	387.411	0.908217	22.823	Active	Acid Volcanic Rocks	5	0	0	0	0
CLA2002_YPG2B	S014WTS002	YPG2B	Clapp	2002	10.1016/S0169-555X(01)00191-X	125684	9042	798000	46000	6.34926	0.0921875	23.7	1.72	2.23	26.1	1.54	2.76	0.908046	0.093533	0.141548	0	0	33.1596	-114.52	33.0401	-114.522	980.41	186.707	280.76	281.584	279.67	280.627	10.0962	6.94244	6.81293	7.95051	169.527	72.7819	111.806	387.411	0.908217	22.823	Active	Acid Volcanic Rocks	5	0	0	0	0
CLA2002_YPG2C	S014WTS003	YPG2C	Clapp	2002	10.1016/S0169-555X(01)00191-X	97654	7234	769000	44000	7.87474	0.093602	30.8	2.3	2.95	27.1	1.59	2.86	1.13653	0.0949671	0.142518	2	0	33.1596	-114.52	33.0401	-114.522	980.41	186.707	280.76	281.584	279.67	280.627	10.0962	6.94244	6.81293	7.95051	169.527	72.7819	111.806	387.411	0.908217	22.823	Active	Acid Volcanic Rocks	5	0	0	0	0
CLA2002_YPG2D	S014WTS004	YPG2D	Clapp	2002	10.1016/S0169-555X(01)00191-X	106696	9042	662000	42000	6.20454	0.105863	28.1	2.41	2.93	31.8	2.05	3.46	0.883648	0.107291	0.150701	1	0	33.1596	-114.52	33.0401	-114.522	980.41	186.707	280.76	281.584	279.67	280.627	10.0962	6.94244	6.81293	7.95051	169.527	72.7819	111.806	387.411	0.908217	22.823	Active	Acid Volcanic Rocks	5	0	0	0	0
CLA2002_YPG2E	S014WTS005	YPG2E	Clapp	2002	10.1016/S0169-555X(01)00191-X	89516	11755	711000	52000	7.94271	0.15031	33.7	4.46	4.89	29.5	2.2	3.39	1.14237	0.15191	0.185096	0	0	33.1596	-114.52	33.0401	-114.522	980.41	186.707	280.76	281.584	279.67	280.627	10.0962	6.94244	6.81293	7.95051	169.527	72.7819	111.806	387.411	0.908217	22.823	Active	Acid Volcanic Rocks	5	0	0	0	0
CLA2002_YPG2F	S014WTS006	YPG2F	Clapp	2002	10.1016/S0169-555X(01)00191-X	98558	10850	632000	39000	6.41247	0.126203	30.5	3.39	3.85	33.3	2.09	3.59	0.915916	0.127644	0.166001	0	0	33.1596	-114.52	33.0401	-114.522	980.41	186.707	280.76	281.584	279.67	280.627	10.0962	6.94244	6.81293	7.95051	169.527	72.7819	111.806	387.411	0.908217	22.823	Active	Acid Volcanic Rocks	5	0	0	0	0
CLA2002_YPG3A	S014WTS027	YPG3A	Clapp	2002	10.1016/S0169-555X(01)00191-X	104887	6329	697000	58000	6.64525	0.102789	27.9	1.7	2.38	29.3	2.49	3.58	0.952218	0.10457	0.149016	0	0	33.1352	-114.557	33.0985	-114.534	984.17	28.7411	250.8	251.186	252.452	251.819	11.4217	6.96957	6.74649	8.37925	171.847	49.3641	106.564	369.385	0.904755	14.1582	Active	Acid Volcanic Rocks	2	0	0	0	0
CLA2002_YPG4A	S014WTS007	YPG4A	Clapp	2002	10.1016/S0169-555X(01)00191-X	103983	9946	646000	38000	6.21255	0.112291	27.9	2.69	3.17	31.5	1.89	3.34	0.885714	0.113561	0.15541	1	0	33.1279	-114.558	33.0885	-114.531	985.78	40.3826	238.16	239.819	241.55	240.684	10.3666	6.84118	7.01056	8.07279	167.424	44.6971	105.172	364.138	0.904755	16.4497	Active	Acid Volcanic Rocks	3	0	0	0	0
CLA2002_YPG4B	S014WTS008	YPG4B	Clapp	2002	10.1016/S0169-555X(01)00191-X	121163	9946	763000	74000	6.2973	0.127061	23.7	1.97	2.43	26.4	2.61	3.49	0.897727	0.129164	0.167298	0	0	33.1279	-114.558	33.0885	-114.531	985.78	40.3826	238.16	239.819	241.55	240.684	10.3666	6.84118	7.01056	8.07279	167.424	44.6971	105.172	364.138	0.904755	16.4497	Active	Acid Volcanic Rocks	3	0	0	0	0
CLA2002_YPG5A	S014WTS028	YPG5A	Clapp	2002	10.1016/S0169-555X(01)00191-X	122971	6329	683000	41000	5.55416	0.0790722	24.9	1.3	1.98	31.6	1.93	3.38	0.787975	0.0803494	0.133282	1	1	33.182	-114.502	33.0885	-114.524	976.13	120.084	188.08	318.717	317.364	318.041	8.0874	6.78833	6.50522	7.12698	169.051	84.9717	116.964	405.554	0.904383	9.63764	Active	Unconsolidated Sediments	4	0	0	0	0
COD2021_BGA	S281WTS006	BGA	Codilean	2021	10.1016/j.earscirev.2021.103543	175165	5783.21	1.07389e+06	62401.2	6.13075	0.0668323	20.2	0.676	1.38	23	1.37	2.45	0.878261	0.0683224	0.126547	1	0	-36.6061	149.649	-36.6738	149.856	964.26	1812.6	405.61	411.36	411.542	411.451	20.0064	16.6013	16.4513	17.6863	351.332	204.519	836.433	6276.79	0.593459	0	Post-Orogenic	Acid Plutonic Rocks	6	0	0	0	0
COD2021_BLG	S281WTS020	BLG	Codilean	2021	10.1016/j.earscirev.2021.103543	76181.1	2306.4	512832	38815.3	6.73175	0.0815185	42.5	1.3	2.84	44.4	3.4	5.15	0.957207	0.0824598	0.133863	0	0	-30.4379	152.654	-30.4504	152.9	961.09	663.59	444.65	449.839	451.512	450.675	31.5495	26.3195	26.3078	28.0589	544.902	229.736	1602.69	10790.9	0.178667	0	Post-Orogenic	Metamorphic Rocks	6	0	0	0	0
COD2021_BRM	S281WTS023	BRM	Codilean	2021	10.1016/j.earscirev.2021.103543	271423	9029.33	1.39264e+06	70634.9	5.1309	0.0606563	8.32	0.287	0.584	11.3	0.601	1.18	0.736283	0.0633928	0.125823	1	1	-27.7639	152.509	-27.6029	152.696	1000.11	632.397	135.01	137.372	136.692	137.032	7.45772	7.62899	7.82302	7.63658	168.998	126.164	888.582	4830.25	0.896076	0	Post-Orogenic	Mixed Sedimentary Rocks	7	0	0	0	0
COD2021_BRS	S281WTS033	BRS	Codilean	2021	10.1016/j.earscirev.2021.103543	133971	4283.21	845780	49188.3	6.31314	0.0663659	21.1	0.685	1.44	23.3	1.39	2.48	0.905579	0.067918	0.126438	1	0	-26.8561	152.136	-27.039	152.403	970.22	3893.85	385.48	388.93	388.431	388.68	12.2324	8.96624	8.32643	9.84167	188.572	61.6674	891.974	5142.46	0.86196	0	Post-Orogenic	Siliciclastic Sedimentary Rocks	9	0	0	0	0
COD2021_BRS-CC	S281WTS032	BRS-CC	Codilean	2021	10.1016/j.earscirev.2021.103543	200424	6363.38	1.10397e+06	67617.9	5.50817	0.0689898	14.5	0.47	0.992	18.3	1.16	2	0.79235	0.0711947	0.128937	1	1	-26.8676	151.972	-26.7456	152.217	963.6	1054.01	446.02	449.336	448.088	448.712	9.59339	7.30661	6.93111	7.9437	156.292	43.3578	836.914	4826.31	0.919502	0	Post-Orogenic	Siliciclastic Sedimentary Rocks	8	0	0	0	0
COD2021_BRS-UP	S281WTS034	BRS-UP	Codilean	2021	10.1016/j.earscirev.2021.103543	176227	5960.29	1.0889e+06	62773.8	6.17897	0.0668376	16	0.553	1.11	17.9	1.07	1.92	0.893855	0.0690493	0.127743	1	0	-26.5949	152.231	-26.737	152.209	968.23	442.506	405.82	409.937	409.872	409.905	16.0919	11.7689	11.0067	12.9559	239.637	50.5208	937.154	5497.4	0.773973	0	Post-Orogenic	Intermediate Volcanic Rocks	5	0	0	0	0
COD2021_CLA	S281WTS021	CLA	Codilean	2021	10.1016/j.earscirev.2021.103543	150324	4231.33	956538	130001	6.3632	0.138792	24.7	0.704	1.63	27	3.75	4.44	0.914815	0.141783	0.177192	0	0	-29.3521	152.351	-29.5908	152.783	934.42	17281.2	664.2	669.928	670.063	669.996	17.2823	14.7991	14.3802	15.4872	312.7	167.967	1090.63	7278.92	0.520305	0	Post-Orogenic	Siliciclastic Sedimentary Rocks	11	0	0	0	0
COD2021_CLY	S281WTS009	CLY	Codilean	2021	10.1016/j.earscirev.2021.103543	170483	5577.27	1.18048e+06	103905	6.92436	0.093902	17.8	0.591	1.22	17.7	1.61	2.25	1.00565	0.0968307	0.144419	0	0	-35.3912	150.174	-35.6495	150.143	983.06	1399.08	260.1	268.649	269.328	268.989	20.3271	15.7752	14.7146	16.939	330.413	189.147	1007.74	7187.87	0.560324	0	Post-Orogenic	Mixed Sedimentary Rocks	5	0	0	0	0
COD2021_CNN	S281WTS004	CNN	Codilean	2021	10.1016/j.earscirev.2021.103543	302347	8496.19	1.78465e+06	89073.4	5.90266	0.0572778	12.5	0.359	0.835	14.7	0.761	1.52	0.85034	0.0592017	0.123102	1	1	-37.3547	149.157	-37.5665	149.138	953.97	645.71	507.54	516.917	515.958	516.437	21.4602	19.5913	19.0782	20.0432	414.212	127.388	904.657	7113.62	0.590524	0	Post-Orogenic	Acid Plutonic Rocks	4	0	0	0	0
COD2021_COL	S281WTS012	COL	Codilean	2021	10.1016/j.earscirev.2021.103543	177141	4531.94	1.18238e+06	77462.2	6.67479	0.0703319	21.3	0.553	1.39	22.1	1.49	2.46	0.963801	0.0722469	0.129031	0	0	-33.1583	150.377	-33.4134	150.74	943.11	4337.06	605.72	611.815	612.312	612.063	22.5763	13.6966	11.7674	16.0134	294.888	120.05	932.644	6423.57	0.631523	0	Post-Orogenic	Siliciclastic Sedimentary Rocks	6	0	0	0	0
COD2021_FTZ-CMT	S281WTS039	FTZ-CMT	Codilean	2021	10.1016/j.earscirev.2021.103543	238260	9465.52	1.26656e+06	109248	5.31587	0.094965	10.9	0.444	0.795	14.2	1.27	1.8	0.767606	0.098276	0.146246	1	1	-24.5349	148.585	-23.6066	148.525	974.84	16440.9	336.41	338.271	338.368	338.319	5.77256	5.29992	5.30486	5.45911	114.145	123.392	644.881	3041.67	0.954262	0	Post-Orogenic	Siliciclastic Sedimentary Rocks	5	0	0	0	0
COD2021_FTZ-CNR	S281WTS040	FTZ-CNR	Codilean	2021	10.1016/j.earscirev.2021.103543	304207	12997.7	2.06728e+06	206559	6.79563	0.10867	7.67	0.341	0.581	7.55	0.813	1.07	1.01589	0.116499	0.160696	0	0	-21.8468	148.855	-22.4226	148.989	982.91	9446.75	265.88	267.904	268.121	268.012	8.13722	6.58138	6.33875	7.01912	150.713	128.543	916.084	4551.99	0.784524	0	Post-Orogenic	Unconsolidated Sediments	9	0	0	0	0
COD2021_FTZ-DON	S281WTS041	FTZ-DON	Codilean	2021	10.1016/j.earscirev.2021.103543	222142	12724.9	1.74508e+06	137673	7.85571	0.0974948	11.3	0.664	0.953	9.61	0.805	1.19	1.17586	0.102322	0.149821	2	0	-24.1724	150.524	-24.1008	150.117	979.57	6809.32	295.73	297.348	296.783	297.066	8.687	6.54604	6.18427	7.1391	147.33	97.0751	706.905	3558	0.925008	0	Post-Orogenic	Mixed Sedimentary Rocks	10	0	0	0	0
COD2021_FTZ-EBW	S281WTS042	FTZ-EBW	Codilean	2021	10.1016/j.earscirev.2021.103543	186300	9312.01	1.10882e+06	88975.1	5.95179	0.0945376	13.4	0.686	1.06	15.6	1.3	1.9	0.858974	0.0978022	0.145229	1	0	-23.8586	148.909	-23.0897	150.118	980.68	135754	281.37	283.035	283.071	283.053	4.91343	4.11112	4.00846	4.34433	91.0794	87.3429	666.606	3165.84	0.947322	0	Post-Orogenic	Mixed Sedimentary Rocks	12	0	0	0	0
COD2021_FTZ-ISC-IS	S281WTS043	FTZ-ISC-IS	Codilean	2021	10.1016/j.earscirev.2021.103543	327123	13499.5	1.76122e+06	147090	5.38397	0.093155	7.26	0.312	0.544	9.24	0.821	1.18	0.785714	0.0987	0.148066	1	1	-21.9357	148.093	-22.2379	148.442	979.8	4197.54	294.41	295.195	295.256	295.226	3.62244	3.2621	3.16663	3.35039	73.8506	58.0756	623.035	2863.44	0.962575	0	Post-Orogenic	Unconsolidated Sediments	6	0	0	0	0
COD2021_FTZ-ISC-MDR	S281WTS044	FTZ-ISC-MDR	Codilean	2021	10.1016/j.earscirev.2021.103543	331805	13974.8	1.92529e+06	152380	5.80246	0.089655	6.9	0.304	0.522	8.07	0.686	1.01	0.855019	0.0957453	0.146243	1	0	-22.0773	148.607	-22.717	149.19	985.03	21393.3	247.25	248.607	248.735	248.671	5.24411	4.34884	4.19857	4.59717	99.3323	106.075	765.7	3678.8	0.884089	0	Post-Orogenic	Unconsolidated Sediments	9	0	0	0	0
COD2021_FTZ-MKZ-B	S281WTS045	FTZ-MKZ-B	Codilean	2021	10.1016/j.earscirev.2021.103543	320325	17217.7	1.86299e+06	154667	5.81595	0.098902	7.8	0.435	0.646	9.14	0.808	1.16	0.853392	0.104524	0.151547	1	0	-23.9986	148.086	-23.0758	149.032	976.18	50782.6	324.66	326.287	326.362	326.324	4.75111	4.13494	4.04056	4.30887	90.1318	96.5481	629.31	2889	0.96163	0	Post-Orogenic	Siliciclastic Sedimentary Rocks	10	0	0	0	0
COD2021_FTZ-MKZ-DS	S281WTS046	FTZ-MKZ-DS	Codilean	2021	10.1016/j.earscirev.2021.103543	275621	12092	1.42925e+06	122365	5.18554	0.0962014	8.89	0.403	0.676	11.8	1.07	1.51	0.75339	0.101378	0.148854	1	1	-23.3801	148.301	-23.3028	149.516	979.56	76783.3	292.84	294.35	294.443	294.397	4.82666	4.14389	4.04188	4.33748	91.6425	98.3806	669.531	3122.55	0.939483	0	Post-Orogenic	Unconsolidated Sediments	12	0	0	0	0
COD2021_FTZ-NGA	S281WTS047	FTZ-NGA	Codilean	2021	10.1016/j.earscirev.2021.103543	222845	16061.5	1.47516e+06	113142	6.61964	0.105249	12.2	0.898	1.16	12.5	1.01	1.51	0.976	0.1093	0.153731	0	0	-24.2693	147.506	-23.5305	148.166	968.04	16518.2	397.2	399.381	399.523	399.452	5.94286	4.84198	4.56735	5.1174	104.471	87.1132	619.018	2808.67	0.961381	0	Post-Orogenic	Mixed Sedimentary Rocks	8	0	0	0	0
COD2021_FTZ-TRS	S281WTS048	FTZ-TRS	Codilean	2021	10.1016/j.earscirev.2021.103543	332996	16439.6	2.05753e+06	152904	6.17886	0.0892181	7.24	0.372	0.58	7.9	0.631	0.965	0.916456	0.0949726	0.146078	0	0	-23.0558	147.723	-23.4346	148.146	979.34	8408.6	299.96	301.147	301.136	301.141	3.23204	2.71021	2.62332	2.85519	62.8135	57.0255	623.011	2783.2	0.970657	0	Post-Orogenic	Unconsolidated Sediments	10	0	0	0	0
COD2021_GNA	S281WTS005	GNA	Codilean	2021	10.1016/j.earscirev.2021.103543	338796	9515.53	2.20458e+06	107374	6.50712	0.056223	10.5	0.304	0.706	11.1	0.567	1.15	0.945946	0.0587156	0.12351	0	0	-37.2716	149.396	-37.4698	149.593	961.21	933.977	447.39	455.799	454.786	455.293	15.1605	13.7289	13.3136	14.0677	291.949	124.215	880.18	7020.24	0.608344	0	Post-Orogenic	Acid Plutonic Rocks	4	0	0	0	0
COD2021_HAS	S281WTS018	HAS	Codilean	2021	10.1016/j.earscirev.2021.103543	167036	4534.55	1.15856e+06	83174	6.93599	0.0767521	20.9	0.577	1.38	20.9	1.54	2.41	1	0.0786864	0.132877	0	0	-31.3761	152.277	-31.4359	152.495	948.92	1647.58	551.88	558.016	557.85	557.933	23.3698	19.2607	17.839	20.1565	405.59	160.813	1421.41	9793.29	0.227535	0	Post-Orogenic	Mixed Sedimentary Rocks	10	0	0	0	0
COD2021_HNT	S281WTS016	HNT	Codilean	2021	10.1016/j.earscirev.2021.103543	166775	5027.22	1.01273e+06	64990.2	6.07243	0.0709006	19	0.581	1.28	21.7	1.43	2.39	0.875576	0.0726478	0.129108	1	0	-32.3573	150.708	-32.6851	151.434	967.22	17795.4	404.04	407.088	406.924	407.006	15.9162	12.2031	11.1655	13.0949	256.631	145.393	797.318	4921.14	0.82953	0	Post-Orogenic	Siliciclastic Sedimentary Rocks	10	0	0	0	0
COD2021_HNT-SNGT	S281WTS015	HNT-SNGT	Codilean	2021	10.1016/j.earscirev.2021.103543	157972	4308.7	913099	69722.5	5.78012	0.0810832	20.4	0.564	1.34	24.7	1.93	2.91	0.825911	0.0828846	0.134888	1	1	-32.3568	150.656	-32.5645	151.158	964.71	16427.4	427.06	430.136	429.995	430.066	16.5108	12.595	11.5151	13.5403	264.676	144.223	794.244	4912.63	0.829999	0	Post-Orogenic	Siliciclastic Sedimentary Rocks	10	0	0	0	0
COD2021_HNT-WLL	S281WTS014	HNT-WLL	Codilean	2021	10.1016/j.earscirev.2021.103543	141489	3836.63	803707	54878.5	5.68035	0.0734689	20	0.551	1.32	24.7	1.73	2.78	0.809717	0.075264	0.130475	1	1	-32.884	151.109	-32.6503	151.022	986.24	1668.91	253.58	259.785	260.041	259.913	19.9355	10.5581	8.91089	13.1348	233.969	78.7009	895.597	5802.73	0.772652	0	Post-Orogenic	Siliciclastic Sedimentary Rocks	5	0	0	0	0
COD2021_LGN	S281WTS022	LGN	Codilean	2021	10.1016/j.earscirev.2021.103543	116551	3643.22	653248	43826	5.60484	0.0740141	23.9	0.758	1.62	30	2.05	3.34	0.796667	0.0753347	0.130344	1	1	-28.2057	152.832	-28.0698	152.927	976.54	1264.37	321.77	326.268	326.108	326.188	18.2144	16.7978	16.2716	17.0946	354.84	200.692	1089.85	6684.05	0.562674	0	Post-Orogenic	Intermediate Volcanic Rocks	7	0	0	0	0
COD2021_LOC	S281WTS031	LOC	Codilean	2021	10.1016/j.earscirev.2021.103543	210315	6354.19	1.12466e+06	57484.1	5.3475	0.0593742	12.7	0.392	0.86	16.5	0.874	1.71	0.769697	0.0613067	0.123798	1	1	-27.6676	152.241	-27.4268	152.508	978.12	2537.98	312.75	317.031	317.069	317.05	14.3248	12.2193	11.4984	12.6808	251.035	160.145	833.986	4737.06	0.833914	0	Post-Orogenic	Siliciclastic Sedimentary Rocks	6	0	0	0	0
COD2021_LOC-15MC	S281WTS024	LOC-15MC	Codilean	2021	10.1016/j.earscirev.2021.103543	124008	3969.36	777746	47217.2	6.27173	0.0686317	24.7	0.8	1.68	27.5	1.7	2.95	0.898182	0.0697891	0.127018	1	0	-27.4081	152.066	-27.453	152.099	959.74	57.298	481	487.613	479.143	483.378	12.7635	11.7533	13.5408	12.6859	247.905	41.4769	868.068	5161.2	0.793183	0	Post-Orogenic	Siliciclastic Sedimentary Rocks	4	0	0	0	0
COD2021_LOC-FSC	S281WTS025	LOC-FSC	Codilean	2021	10.1016/j.earscirev.2021.103543	117641	3818.58	747628	46198.8	6.35516	0.0698004	25.1	0.825	1.71	27.5	1.74	2.98	0.912727	0.0713006	0.128	1	0	-27.6584	152.034	-27.6187	152.112	966.41	129.546	422.78	429.78	434.86	432.32	18.1173	14.1807	11.9655	14.7545	289.786	48.3424	782.526	4512.4	0.869597	0	Post-Orogenic	Siliciclastic Sedimentary Rocks	4	0	0	0	0
COD2021_LOC-LC	S281WTS026	LOC-LC	Codilean	2021	10.1016/j.earscirev.2021.103543	139507	4425.94	746658	51800.8	5.35214	0.0762867	20.1	0.647	1.37	26.3	1.87	2.98	0.764259	0.0780495	0.132229	1	1	-27.8204	152.366	-27.6713	152.37	973.92	212.801	349.03	358.883	359.502	359.193	21.5542	22.0389	21.499	21.6973	426.838	178.689	891.961	5230.28	0.708426	0	Post-Orogenic	Basic Volcanic Rocks	4	0	0	0	0
COD2021_LOC-MC	S281WTS027	LOC-MC	Codilean	2021	10.1016/j.earscirev.2021.103543	214130	6599.56	1.2117e+06	63557.7	5.65872	0.0608379	13.6	0.429	0.925	16.7	0.906	1.74	0.814371	0.0627555	0.124426	1	1	-27.4318	152.057	-27.4756	152.092	964.13	162.814	441.47	448.393	443.698	446.045	13.3443	11.6883	13.1961	12.7429	248.379	62.346	841.336	4949.71	0.835757	0	Post-Orogenic	Siliciclastic Sedimentary Rocks	4	0	0	0	0
COD2021_LOC-PC	S281WTS028	LOC-PC	Codilean	2021	10.1016/j.earscirev.2021.103543	222322	7049.36	1.29615e+06	72310	5.83006	0.0641696	13.4	0.436	0.92	16	0.923	1.7	0.8375	0.0662308	0.126502	1	1	-27.4317	152.132	-27.453	152.104	960.06	26.2132	478.81	485.337	475.852	480.594	17.164	11.5742	11.303	13.3471	252.986	52.8899	895.353	5388.62	0.721688	0	Post-Orogenic	Mixed Sedimentary Rocks	3	0	0	0	0
COD2021_LOC-SCS	S281WTS029	LOC-SCS	Codilean	2021	10.1016/j.earscirev.2021.103543	340539	10782.2	1.88135e+06	94697.4	5.52461	0.059465	7.53	0.248	0.525	9.35	0.5	0.991	0.805348	0.0628043	0.126865	1	1	-27.506	152.141	-27.5265	152.128	978.87	10.7973	313.59	317.953	309.909	313.931	11.5389	8.54924	9.56694	9.88503	205.371	26.2998	808.786	4630.5	0.928921	0	Post-Orogenic	Mixed Sedimentary Rocks	1	0	0	0	0
COD2021_LOC-TH	S281WTS030	LOC-TH	Codilean	2021	10.1016/j.earscirev.2021.103543	109700	3474.99	584937	45455	5.33214	0.0839176	28.8	0.923	1.95	37.9	2.99	4.46	0.759894	0.085153	0.135767	1	1	-27.8011	152.242	-27.6332	152.215	956.49	449.627	498.52	503.615	502.435	503.025	26.4935	22.4618	20.2321	23.0624	438.021	109.051	843.242	5009.95	0.704345	0	Post-Orogenic	Basic Volcanic Rocks	4	0	0	0	0
COD2021_MAN	S281WTS017	MAN	Codilean	2021	10.1016/j.earscirev.2021.103543	184196	4843.84	1.22481e+06	74212.3	6.64948	0.0660515	20.5	0.546	1.34	21.3	1.33	2.3	0.962441	0.0678844	0.126225	0	0	-31.7291	151.761	-31.9047	152.236	938.52	6398.6	631.79	636.672	636.792	636.732	23.5348	19.696	18.3955	20.5421	408.411	146.893	1118.61	7621.08	0.516159	0	Post-Orogenic	Mixed Sedimentary Rocks	10	0	0	0	0
COD2021_MAR-KNW	S281WTS038	MAR-KNW	Codilean	2021	10.1016/j.earscirev.2021.103543	105736	3537.29	618925	43214.6	5.85347	0.0774228	26.7	0.902	1.83	31.9	2.27	3.6	0.836991	0.0787718	0.132035	1	1	-26.7131	152.677	-26.596	152.732	972.17	519.672	365.65	372.314	372.252	372.283	17.9537	14.9821	15.1375	16.0244	321.639	94.5982	1295.6	7957.43	0.46212	0	Post-Orogenic	Acid Plutonic Rocks	7	0	0	0	0
COD2021_MAR-OB	S281WTS036	MAR-OB	Codilean	2021	10.1016/j.earscirev.2021.103543	82027.6	2820.25	458704	48685.6	5.59207	0.111567	33	1.14	2.27	41.6	4.48	5.76	0.793269	0.113097	0.154607	1	0	-26.6873	152.827	-26.597	152.741	979.92	198.012	303.55	308.957	309.408	309.183	15.2995	11.4829	10.7971	12.5265	254.031	61.6804	1522.34	9276.13	0.299401	0	Post-Orogenic	Intermediate Volcanic Rocks	5	0	0	0	0
COD2021_MCD	S281WTS013	MCD	Codilean	2021	10.1016/j.earscirev.2021.103543	144487	3910.02	880246	68774.6	6.09221	0.0826849	19.7	0.543	1.3	22.6	1.81	2.7	0.871681	0.0846989	0.136483	1	0	-32.9988	150.843	-33.2913	150.973	985.48	1737.06	259.18	267.546	267.087	267.316	22.1063	8.51347	6.84939	12.4897	199.439	62.9445	886.128	5721.4	0.753611	0	Post-Orogenic	Siliciclastic Sedimentary Rocks	3	0	0	0	0
COD2021_MCL	S281WTS019	MCL	Codilean	2021	10.1016/j.earscirev.2021.103543	101772	3044.29	633798	43296.8	6.22761	0.0745754	43	1.3	2.86	48.3	3.34	5.37	0.890269	0.0754711	0.129556	1	0	-30.6792	152.005	-31.0588	152.731	914.06	10196.2	852.58	855.786	855.974	855.88	18.4958	15.856	14.6242	16.3253	324.655	225.512	1028.87	6993.61	0.519049	0	Post-Orogenic	Siliciclastic Sedimentary Rocks	10	0	0	0	0
COD2021_MOR	S281WTS008	MOR	Codilean	2021	10.1016/j.earscirev.2021.103543	169037	5556.78	1.06755e+06	67244.2	6.31546	0.0710516	20.4	0.682	1.4	22.5	1.46	2.47	0.906667	0.0729947	0.129464	1	0	-35.8051	149.834	-35.907	150.036	965.15	1318.84	412.45	420.214	421.391	420.803	29.2851	22.604	20.7409	24.21	466.147	172.912	879.116	6446.83	0.550156	0	Post-Orogenic	Mixed Sedimentary Rocks	7	0	0	0	0
COD2021_MQR	S281WTS011	MQR	Codilean	2021	10.1016/j.earscirev.2021.103543	90844.9	2624.98	532849	39945.7	5.86548	0.0803421	36.8	1.07	2.44	44.4	3.37	5.13	0.828829	0.0812796	0.133214	1	1	-34.5766	150.666	-34.5771	150.707	968.89	33.5628	388.65	401.199	404.235	402.717	23.3902	27.7115	30.6702	27.2573	544.888	87.6154	1381.81	9873.19	0.219914	0	Post-Orogenic	Siliciclastic Sedimentary Rocks	5	0	0	0	0
COD2021_MTC	S281WTS001	MTC	Codilean	2021	10.1016/j.earscirev.2021.103543	443845	12439.5	2.21468e+06	124870	4.98976	0.0629646	10.8	0.312	0.727	15.1	0.884	1.61	0.715232	0.0652829	0.126094	1	1	-37.3603	147.142	-37.7268	147.385	918.55	3893.7	792.98	799.491	800.101	799.796	31.9012	26.0716	23.9933	27.322	531.81	181.226	950.177	7484.66	0.239601	0	Post-Orogenic	Mixed Sedimentary Rocks	7	0	0	0	0
COD2021_SHL	S281WTS010	SHL	Codilean	2021	10.1016/j.earscirev.2021.103543	199942	5721.27	1.25915e+06	70678.8	6.2976	0.0630048	19.9	0.579	1.33	22	1.27	2.32	0.904545	0.0646451	0.12485	1	0	-35.2968	149.992	-34.873	150.463	941.93	6515.88	624.02	628.251	628.35	628.301	12.5439	11.4016	10.301	11.4155	240.312	152.317	876.027	6356.91	0.53126	0	Post-Orogenic	Mixed Sedimentary Rocks	9	0	0	0	0
COD2021_SNW	S281WTS003	SNW	Codilean	2021	10.1016/j.earscirev.2021.103543	524107	14139.7	3.11045e+06	149440	5.93477	0.0551009	9.64	0.268	0.645	11.1	0.563	1.15	0.868468	0.0578401	0.123331	1	1	-36.7448	148.676	-37.71	148.411	909.06	13554.4	888.45	893.255	893.189	893.222	16.6822	15.2412	14.8087	15.5774	319.44	178.832	813.528	6364.99	0.461716	0	Post-Orogenic	Acid Plutonic Rocks	10	0	0	0	0
COD2021_STN	S281WTS035	STN	Codilean	2021	10.1016/j.earscirev.2021.103543	142460	4732.34	830636	50623.6	5.83065	0.0694106	17.5	0.59	1.2	20.8	1.31	2.26	0.841346	0.0714369	0.128482	1	1	-26.8506	152.832	-26.9194	152.776	990	195.427	218.63	222.431	224.111	223.271	10.7412	9.9069	10.2434	10.2972	215.236	120.811	1529.69	9090.07	0.276821	0	Post-Orogenic	Siliciclastic Sedimentary Rocks	8	0	0	0	0
COD2021_TMB	S281WTS002	TMB	Codilean	2021	10.1016/j.earscirev.2021.103543	322703	9591.73	1.7905e+06	106123	5.54846	0.0663051	12.7	0.387	0.861	16	0.981	1.73	0.79375	0.0684675	0.127621	1	1	-37.3428	147.847	-37.7659	147.844	941.82	2783.27	593.74	600.448	602.227	601.337	22.2029	18.4591	18.0214	19.5611	389.532	158.548	774.14	5797.34	0.469955	0	Post-Orogenic	Mixed Sedimentary Rocks	9	0	0	0	0
COD2021_TRS	S281WTS007	TRS	Codilean	2021	10.1016/j.earscirev.2021.103543	136957	4241.97	942270	52042.8	6.88006	0.0633232	27.5	0.861	1.85	27.9	1.57	2.91	0.985663	0.064396	0.124114	0	0	-36.2018	149.717	-36.0967	150.021	955.01	1658.55	481.47	489.806	489.308	489.557	23.3417	19.8979	18.6157	20.6184	410.143	197.075	893.429	6777.6	0.562933	0	Post-Orogenic	Mixed Sedimentary Rocks	6	0	0	0	0
COX2009_MRC-01	S341WTS001	MRC-01	Cox	2009	10.1086/598945	573773	10895.3	3.29564e+06	82854.9	5.74381	0.0315061	9.24	0.181	0.591	10.9	0.288	1.03	0.847706	0.0328914	0.114107	1	1	-19.0649	47.0435	-18.9846	47.0216	855.38	148.426	1463.65	1462.66	1461.55	1462.1	13.1421	7.35604	6.44488	8.98101	175.487	57.1034	1462.47	10103.3	0.148479	1.80659	Active	Metamorphic Rocks	1	0	0	0	0
COX2009_MRC-05	S341WTS027	MRC-05	Cox	2009	10.1086/598945	1.90787e+06	27509.2	1.05054e+07	220132	5.50632	0.0254359	2.63	0.0422	0.178	3.06	0.0766	0.324	0.859477	0.0297338	0.125665	1	1	-18.2601	47.1792	-18.267	47.169	851.18	3.68991	1505.57	1501.56	1456.5	1479.03	19.1455	19.9013	25.2729	21.4399	353.65	22.0543	1412.25	9636.75	0.273023	0.4	Post-Orogenic	Acid Plutonic Rocks	1	0	0	0	0
COX2009_MRC-09	S341WTS031	MRC-09	Cox	2009	10.1086/598945	118012	2994.33	677383	23423.2	5.73995	0.0428894	18.5	0.477	1.21	22.4	0.796	2.13	0.825893	0.0439043	0.115412	1	1	-16.3374	46.8728	-16.3146	46.8225	995.7	63.7151	163.24	160.531	159.985	160.258	7.83519	6.95422	6.93408	7.24117	139.783	33.7671	1445.8	6710.84	0.60659	0.714143	Post-Orogenic	Siliciclastic Sedimentary Rocks	2	0	0	0	0
COX2009_MRC-11	S341WTS003	MRC-11	Cox	2009	10.1086/598945	68674.5	1881.48	436326	26637	6.35354	0.0669142	30.3	0.839	1.99	33.4	2.07	3.58	0.907186	0.0678804	0.125707	1	0	-16.1659	46.8369	-16.1486	46.8386	1008.18	6.57169	55.21	54.8148	55.3333	55.0741	2.00203	1.85038	2.60569	2.1527	47.0777	8.88622	1473.75	6657.12	0.618228	0.714143	Post-Orogenic	Siliciclastic Sedimentary Rocks	2	0	0	0	0
COX2009_MRC-14	S341WTS006	MRC-14	Cox	2009	10.1086/598945	46525.1	1285.81	334204	20912.6	7.18329	0.0684057	44.9	1.25	2.94	43.7	2.77	4.71	1.02746	0.0692309	0.126111	0	0	-16.1687	46.7979	-16.1598	46.7924	1010.4	2.23715	35.98	34.875	36	35.4375	2.38962	1.44852	1.68105	1.83973	32.7105	1.69997	1460.33	6569.67	NaN	0.714143	Post-Orogenic	Siliciclastic Sedimentary Rocks	1	0	0	0	0
COX2009_MRC-17	S341WTS009	MRC-17	Cox	2009	10.1086/598945	1.47784e+06	27075.9	8.03798e+06	151317	5.439	0.026269	3.67	0.0728	0.245	4.43	0.0946	0.443	0.828442	0.0291461	0.120235	1	1	-18.2429	47.2355	-18.1578	47.2106	844.17	132.049	1573.26	1572.07	1572.68	1572.38	10.0354	5.2551	4.3048	6.53176	136.499	47.3381	1425.47	10046.8	0.188358	0.46692	Post-Orogenic	Acid Plutonic Rocks	1	0	0	0	0
COX2009_MRC-18	S341WTS010	MRC-18	Cox	2009	10.1086/598945	910263	15116.3	4.88284e+06	91316.4	5.36421	0.0250105	5.4	0.0948	0.35	6.74	0.137	0.646	0.801187	0.0268582	0.115704	1	1	-18.3404	47.1825	-18.3228	47.1233	862.48	128.483	1389.11	1384.66	1381.96	1383.31	16.043	14.0679	15.5183	15.2097	297.532	114.195	1418.76	9467.43	0.191934	0.442942	Post-Orogenic	Acid Plutonic Rocks	2	0	0	0	0
COX2009_MRC-21	S341WTS014	MRC-21	Cox	2009	10.1086/598945	125837	3341.16	894654	23809.9	7.10962	0.0375934	30.9	0.829	2.02	30.1	0.817	2.76	1.02658	0.0381641	0.112612	0	0	-18.9728	48.4048	-18.9186	48.5362	905.32	485.685	985.85	984.805	983.119	983.962	14.826	7.07571	6.57745	9.49306	165.771	89.2317	1838.74	13543.4	0.0917566	0.427271	Post-Orogenic	Metamorphic Rocks	4	0	0	0	0
COX2009_MRC-24	S341WTS017	MRC-24	Cox	2009	10.1086/598945	144104	3609.58	818907	21301.4	5.68275	0.0361116	26.5	0.672	1.72	32.4	0.857	2.96	0.817901	0.0366427	0.112067	1	1	-18.7292	48.4406	-18.7991	48.6655	907.73	1923.02	954.64	953.572	952.235	952.903	17.7701	9.98822	9.02099	12.2598	221.101	117.908	1817.46	12920.2	0.0955352	0.537295	Post-Orogenic	Metamorphic Rocks	4	0	0	0	0
COX2009_MRC-25	S341WTS018	MRC-25	Cox	2009	10.1086/598945	495976	11629.1	2.9031e+06	53145.4	5.85331	0.029747	9.41	0.228	0.617	10.9	0.21	1.01	0.863303	0.0309556	0.113513	1	1	-21.202	47.3086	-21.2442	47.3956	877.81	502.847	1247.7	1246.2	1246.74	1246.47	13.8318	5.38679	4.81656	8.01173	137.327	59.1797	1419.98	10076.2	0.110875	0.658053	Post-Orogenic	Metamorphic Rocks	2	0	0	0	0
COX2009_MRC-26	S341WTS019	MRC-26	Cox	2009	10.1086/598945	165519	4144.91	1.03472e+06	25625.5	6.25138	0.0352199	17.2	0.439	1.12	19	0.486	1.76	0.905263	0.0361347	0.113229	1	1	-21.3353	47.6134	-21.3069	47.6371	957.07	30.4161	517.61	517.713	517.821	517.767	15.5186	5.06377	4.79864	8.46033	130.867	18.3934	2330.33	15335.2	0.132176	0.5225	Post-Orogenic	Metamorphic Rocks	1	0	0	0	0
COX2009_MRC-29	S341WTS022	MRC-29	Cox	2009	10.1086/598945	515858	9213.09	3.24789e+06	66927.1	6.29609	0.0272689	10.6	0.195	0.674	11.4	0.247	1.06	0.929825	0.028423	0.112644	1	1	-20.3367	47.4083	-20.3934	47.1629	852.59	2505.55	1491.78	1490.07	1490.3	1490.18	16.5736	10.5866	9.88798	12.3494	234.663	105.921	1490.04	11193.9	0.0490674	0.407552	Post-Orogenic	Metamorphic Rocks	2	0	0	0	0
COX2009_MRC-30	S341WTS024	MRC-30	Cox	2009	10.1086/598945	262706	6431.9	1.68825e+06	51933	6.42641	0.0393153	25.7	0.638	1.66	27.4	0.862	2.56	0.937956	0.0400749	0.113584	1	0	-20.188	47.1393	-20.1682	47.0964	820.55	54.6026	1813.74	1810.37	1810.68	1810.52	12.5036	8.48163	7.94248	9.64256	253.173	112.408	1414.97	10938.8	0.0717562	0.473558	Post-Orogenic	Metamorphic Rocks	2	0	0	0	0
COX2009_MRC-31	S341WTS025	MRC-31	Cox	2009	10.1086/598945	411884	9888.75	2.36055e+06	78015.9	5.73111	0.0408498	15.3	0.375	0.995	18.2	0.621	1.73	0.840659	0.0420115	0.115172	1	1	-19.898	47.1171	-20.1524	47.0813	831.12	1480.29	1699.9	1698.62	1698.52	1698.57	11.4086	9.26227	9.74507	10.1386	207.756	120.289	1442.1	10915.2	0.0723333	0.735424	Post-Orogenic	Metamorphic Rocks	5	0	0	0	0
DET2014_DC-01-17	S169WTS038	DC-01-17	Dethier	2014	10.1130/G34922.1	634000	8280	4.55324e+06	112347	7.18177	0.0279172	34.6	0.456	2.11	33	0.829	3	1.04848	0.0283684	0.109468	2	0	40.8743	-105.848	40.8763	-105.866	719.344	19.8404	2824.58	2831.12	2804.95	2818.03	19.4436	27.1609	32.4665	26.357	494.513	71.7388	553.533	4217.7	0.251455	0	Post-Orogenic	Siliciclastic Sedimentary Rocks	3	0	0	0	0
DET2014_MJ-BC-17	S403WTS001	MJ-BC-17	Dethier	2014	10.1130/G34922.1	1140000	13900	6.96865e+06	236254	6.11285	0.0360284	29	0.357	1.76	32.1	1.11	3.02	0.903427	0.0367053	0.111957	1	1	40.0532	-105.591	40.0491	-105.593	659.67	0.235073	0	3513	3500.12	3506.56	0	25.1925	20.7546	15.3157	528.667	10.873	693.381	5859.09	NaN	0	Post-Orogenic	Acid Plutonic Rocks	2	0.235073	100	0	0
ECC2019_BR2	S247WTS001	BR2	Eccleshall	2019	ro.uow.edu.au/theses1/554	480000	10000	2250000	400000	4.6875	0.178994	5.05	0.112	0.335	7.45	1.43	1.59	0.677852	0.193223	0.223495	1	0	-24.8438	145.434	-24.4785	145.173	976.93	3938.06	324.81	325.222	325.19	325.206	1.6021	1.3729	1.49273	1.48924	30.0969	20.597	498.038	1981.52	0.969599	0	Post-Orogenic	Siliciclastic Sedimentary Rocks	3	0	0	0	0
ECC2019_BW1	S247WTS002	BW1	Eccleshall	2019	ro.uow.edu.au/theses1/554	520000	17000	2060000	150000	3.96154	0.0798178	4.55	0.159	0.327	8.09	0.632	0.978	0.562423	0.0855808	0.140639	1	1	-24.2776	145.099	-25.1784	143.271	978.09	51858.2	309.43	309.844	309.814	309.829	1.75758	1.48252	1.56692	1.60234	32.4219	27.6657	467.665	1842.25	0.964273	0	Post-Orogenic	Siliciclastic Sedimentary Rocks	4	0	0	0	0
ECC2019_CB1	S247WTS005	CB1	Eccleshall	2019	ro.uow.edu.au/theses1/554	490000	18000	1770000	160000	3.61224	0.0975745	4.6	0.18	0.341	9.08	0.875	1.21	0.506608	0.104007	0.152491	1	1	-23.7236	144.068	-27.3664	141.954	984.52	200829	246.46	246.378	246.362	246.37	1.38831	1.05975	1.1465	1.19819	23.639	20.9587	408.067	1546.88	0.94674	0	Post-Orogenic	Unconsolidated Sediments	7	0	0	0	0
ECC2019_CH-FS1	S247WTS007	CH-FS1	Eccleshall	2019	ro.uow.edu.au/theses1/554	510000	6000	3250000	230000	6.37255	0.0717405	4.32	0.0544	0.278	4.44	0.357	0.561	0.972973	0.0813855	0.141795	0	0	-24.7207	143.759	-27.7105	140.899	988.63	236902	227.37	227.237	227.226	227.231	1.41287	1.05368	1.13759	1.20138	23.6219	20.7993	380.549	1437.55	0.943343	0	Post-Orogenic	Unconsolidated Sediments	7	0	0	0	0
ECC2019_CO1	S247WTS004	CO1	Eccleshall	2019	ro.uow.edu.au/theses1/554	500000	7000	1860000	230000	3.72	0.124446	4.5	0.0672	0.291	8.59	1.14	1.38	0.523865	0.13355	0.173179	1	1	-23.7236	144.068	-27.3156	141.956	984.52	200792	246.49	246.407	246.389	246.398	1.38831	1.05969	1.14641	1.19814	23.6377	20.9597	408.103	1547.03	0.946747	0	Post-Orogenic	Unconsolidated Sediments	7	0	0	0	0
ECC2019_KWB-FS1	S247WTS009	KWB-FS1	Eccleshall	2019	ro.uow.edu.au/theses1/554	420000	6000	1620000	220000	3.85714	0.136552	5.3	0.08	0.34	9.74	1.4	1.66	0.544148	0.144528	0.182105	1	1	-24.7381	143.12	-28.5241	137.921	990.43	280854	199.51	199.315	199.296	199.306	1.49061	1.03042	1.08407	1.2017	23.2047	19.6518	345.96	1297.36	0.934941	0	Post-Orogenic	Unconsolidated Sediments	7	0	0	0	0
ECC2019_NET-FS1	S247WTS008	NET-FS1	Eccleshall	2019	ro.uow.edu.au/theses1/554	530000	8000	3040000	500000	5.73585	0.165165	4.09	0.0663	0.267	4.75	0.879	0.992	0.861053	0.185761	0.218807	0	0	-24.7357	143.255	-28.5819	138.81	990.31	273154	204.39	204.193	204.178	204.186	1.48345	1.03547	1.09228	1.20373	23.3005	19.8703	351.958	1321.26	0.936392	0	Post-Orogenic	Unconsolidated Sediments	7	0	0	0	0
ECC2019_WD-FS1	S247WTS003	WD-FS1	Eccleshall	2019	ro.uow.edu.au/theses1/554	430000	6000	2390000	610000	5.55814	0.255611	5.42	0.0799	0.347	6.6	1.84	1.94	0.821212	0.279177	0.300831	0	0	-23.0235	144.576	-25.3951	142.785	980.64	149473	278.74	278.783	278.764	278.774	1.3832	1.11995	1.22026	1.24114	24.6614	21.2477	450.69	1725.11	0.952896	0	Post-Orogenic	Siliciclastic Sedimentary Rocks	7	0	0	0	0
ECC2019_WN1	S247WTS006	WN1	Eccleshall	2019	ro.uow.edu.au/theses1/554	1420000	24000	5090000	520000	3.58451	0.10355	1.26	0.0263	0.0957	2.48	0.314	0.411	0.508065	0.128322	0.182301	1	1	-27.2088	142.99	-27.6947	142.758	996.84	8023.67	154.92	154.735	154.7	154.718	1.32387	0.903441	0.975081	1.06746	21.1785	14.0285	272.229	1019.01	0.944559	0	Post-Orogenic	Unconsolidated Sediments	2	0	0	0	0
FER2014_LO18-4	S406WTS001	LO18-4	Fernandes	2014	AGU Abstract ID: EP23A-3585	203935	5395	1.27323e+06	44142.7	6.24331	0.0436101	16.2	0.435	1.06	17.8	0.637	1.71	0.910112	0.0447403	0.116234	1	1	-21.094	-42.6016	-21.1179	-42.5757	932.46	24.4521	0	724.969	726.88	725.925	0	9.44655	9.25664	6.2344	279.58	69.2192	1338.5	10663.4	0.0439965	0	Post-Orogenic	Metamorphic Rocks	1	0	0	0	0
FER2014_LO18-5	S406WTS002	LO18-5	Fernandes	2014	AGU Abstract ID: EP23A-3585	110853	3048	754053	51053.5	6.80228	0.0730756	27.8	0.772	1.83	28.3	1.96	3.16	0.982332	0.0746179	0.12962	0	0	-21.1088	-42.5619	-21.1089	-42.5664	945.253	0.922675	0	613.5	591.105	602.303	0	6.30058	10.5537	5.61809	307.357	25.4912	1326	10410	NaN	0	Post-Orogenic	Metamorphic Rocks	1	0	0	0	0
FUL2020_BlnG	S280WTS017	BlnG	Fulop	2020	10.1126/sciadv.aaz8845	268750	7230	1524020	324760	5.67077	0.214786	10.1	0.279	0.673	12.2	2.73	2.94	0.827869	0.225469	0.250026	0	0	-27.2748	150.236	-27.6419	148.727	973	54824.9	368.97	370.254	370.28	370.267	2.77305	2.36656	2.3272	2.48894	51.3954	63.474	626.055	3154.68	0.950529	0	Post-Orogenic	Unconsolidated Sediments	7	0	0	0	0
FUL2020_BrwW	S280WTS018	BrwW	Fulop	2020	10.1126/sciadv.aaz8845	318780	9490	1298130	71940	4.07218	0.062908	9.05	0.279	0.618	15.7	0.902	1.67	0.576433	0.065201	0.126403	1	1	-29.5803	150.183	-30.0178	148.052	967.96	131681	394.5	395.679	395.595	395.637	4.57345	3.82273	3.85593	4.08404	84.359	105.853	662.642	3479.58	0.919954	0	Post-Orogenic	Unconsolidated Sediments	12	0	0	0	0
FUL2020_ClgC	S280WTS019	ClgC	Fulop	2020	10.1126/sciadv.aaz8845	598570	16080	2990750	149050	4.99649	0.0566163	4.06	0.117	0.283	5.54	0.306	0.61	0.732852	0.0623003	0.130317	1	1	-27.2597	148.471	-29.6898	146.645	978.41	136718	315.07	316.005	316.033	316.019	2.1268	1.65084	1.6087	1.79545	35.853	49.8058	533.674	2523.07	0.931661	0	Post-Orogenic	Unconsolidated Sediments	8	0	0	0	0
FUL2020_CstC	S280WTS020	CstC	Fulop	2020	10.1126/sciadv.aaz8845	396020	10650	2111650	121290	5.33218	0.0634223	7.9	0.221	0.532	10.2	0.62	1.12	0.77451	0.0669127	0.128809	1	1	-31.6292	149.2	-31.5371	148.587	960.43	6712.6	477.01	479.173	478.683	478.928	4.89709	4.53093	4.52923	4.65242	97.9525	68.5503	698.726	3740.76	0.921679	0	Post-Orogenic	Mixed Sedimentary Rocks	5	0	0	0	0
FUL2020_CstG	S280WTS021	CstG	Fulop	2020	10.1126/sciadv.aaz8845	541360	14550	2957360	153370	5.46283	0.0584112	4.9	0.14	0.337	6.09	0.346	0.671	0.804598	0.0635941	0.129884	1	1	-31.1573	148.757	-30.3137	148	977.97	17169.9	317.22	318.277	317.971	318.124	3.0593	2.55639	2.63275	2.74948	56.8658	78.1252	602.837	3033.53	0.911788	0	Post-Orogenic	Unconsolidated Sediments	5	0	0	0	0
FUL2020_DrlB	S280WTS022	DrlB	Fulop	2020	10.1126/sciadv.aaz8845	342390	9210	1463790	84930	4.27521	0.0639528	7.9	0.221	0.532	13	0.788	1.41	0.607692	0.0667593	0.127667	1	1	-29.4024	148.901	-30.063	145.959	975.91	390488	334.07	334.977	334.962	334.969	3.28826	2.58843	2.56674	2.81448	56.9072	83.762	579.268	2927.23	0.910095	0	Post-Orogenic	Unconsolidated Sediments	12	0	0	0	0
FUL2020_DrlP	S280WTS023	DrlP	Fulop	2020	10.1126/sciadv.aaz8845	333320	9900	1271430	66710	3.81444	0.0602918	7.82	0.241	0.537	14.6	0.795	1.53	0.535616	0.0625684	0.12529	1	1	-29.2724	147.535	-32.8856	142.348	981.06	600779	289.31	290.014	290.013	290.013	2.66467	2.07541	2.07516	2.27175	45.8051	70.7804	500.215	2433.76	0.909607	0	Post-Orogenic	Unconsolidated Sediments	12	0	0	0	0
FUL2020_DrlT	S280WTS024	DrlT	Fulop	2020	10.1126/sciadv.aaz8845	354880	9540	1410400	82050	3.9743	0.0640858	7.53	0.211	0.508	13.4	0.813	1.45	0.56194	0.0668299	0.127517	1	1	-29.411	148.645	-30.9754	144.426	977.35	424363	319.96	320.824	320.816	320.82	3.13392	2.45051	2.43513	2.67318	53.9701	81.2532	560.409	2814.53	0.907862	0	Post-Orogenic	Unconsolidated Sediments	12	0	0	0	0
FUL2020_DrlW	S280WTS025	DrlW	Fulop	2020	10.1126/sciadv.aaz8845	480440	15230	2.08268e+06	111810	4.33494	0.0623462	5.38	0.18	0.38	8.67	0.497	0.939	0.620531	0.0663735	0.129301	1	1	-29.4158	148.331	-31.5864	143.648	978.5	461983	305.93	306.721	306.712	306.716	3.00716	2.34225	2.33164	2.56035	51.6647	78.6188	539.203	2692.98	0.905554	0	Post-Orogenic	Unconsolidated Sediments	12	0	0	0	0
FUL2020_GTG	S280WTS001	GTG	Fulop	2020	10.1126/sciadv.aaz8845	404620	15610	2446530	142170	6.04649	0.0697513	24.9	0.973	1.78	28.4	1.68	3.01	0.876761	0.0708961	0.127841	1	0	-36.3555	148.364	-36.3733	148.368	812.05	5.80659	1837.8	1838.08	1846.5	1842.29	27.8927	21.5791	16.2368	21.9029	520.468	54.1673	1847.78	17819.3	NaN	0	Post-Orogenic	Acid Plutonic Rocks	1	0	0	0	0
FUL2020_GwyB	S280WTS026	GwyB	Fulop	2020	10.1126/sciadv.aaz8845	455850	16570	2803840	138450	6.1508	0.0613152	8.98	0.337	0.643	9.92	0.519	1.04	0.905242	0.0643861	0.126958	1	0	-30.2944	151.197	-29.8606	150.58	918.05	6398.23	850.04	852.551	852.167	852.359	8.54985	7.07474	6.8672	7.49727	156.133	77.2426	821.33	5006.29	0.861377	0	Post-Orogenic	Acid Plutonic Rocks	9	0	0	0	0
FUL2020_LchR	S280WTS007	LchR	Fulop	2020	10.1126/sciadv.aaz8845	559310	15570	3377950	177940	6.0395	0.0595802	7	0.203	0.477	7.86	0.445	0.852	0.890585	0.0636109	0.128037	1	0	-34.5591	149.242	-34.2131	149.07	936.02	3292.5	692.4	692.821	692.697	692.759	7.46688	5.90207	5.76113	6.3767	128.657	43.0337	737.035	4839.01	0.769966	0	Post-Orogenic	Mixed Sedimentary Rocks	6	0	0	0	0
FUL2020_MbgDP-b	S280WTS009	MbgDP-b	Fulop	2020	10.1126/sciadv.aaz8845	389380	13380	2349040	152900	6.03277	0.0736039	9.94	0.352	0.699	11.3	0.774	1.28	0.879646	0.0771083	0.133328	1	0	-35.4658	148.192	-34.5668	145.999	943.15	37783.3	586.84	588.831	588.714	588.772	9.81037	8.92121	8.64778	9.12645	189.652	156.853	750.132	4999.81	0.64288	0	Post-Orogenic	Unconsolidated Sediments	12	0	0	0	0
FUL2020_MbgG	S280WTS010	MbgG	Fulop	2020	10.1126/sciadv.aaz8845	362250	12440	2126330	132190	5.86979	0.0710224	12.6	0.443	0.882	14.8	0.959	1.64	0.851351	0.0737213	0.131069	1	1	-35.4559	148.807	-35.0756	148.088	920.32	22354.9	799.07	802.067	801.945	802.006	13.2075	12.2315	11.7523	12.3971	257.769	159.623	846.113	6035.05	0.567667	0	Post-Orogenic	Acid Plutonic Rocks	12	0	0	0	0
FUL2020_MbgLP-1	S280WTS011	MbgLP-1	Fulop	2020	10.1126/sciadv.aaz8845	732640	41970	4391960	257310	5.9947	0.0819394	9.68	0.572	0.821	11	0.678	1.2	0.88	0.085386	0.138182	1	0	-35.5971	148.592	-35.6247	148.581	857.51	20.0056	1411.17	1416.9	1416.79	1416.84	9.92289	12.4048	9.47725	10.6017	253.475	44.6281	1159.22	9923.44	0.271981	0	Post-Orogenic	Acid Volcanic Rocks	5	0	0	0	0
FUL2020_MbgLP-2	S280WTS012	MbgLP-2	Fulop	2020	10.1126/sciadv.aaz8845	762300	36490	4578280	287500	6.00588	0.0789606	9.28	0.459	0.728	10.5	0.696	1.18	0.88381	0.0827055	0.137053	1	0	-35.6427	148.585	-35.6987	148.551	857.85	95.9969	1403.45	1409.71	1408.59	1409.15	9.87221	10.8523	9.42527	10.0499	232.403	57.9768	1176.4	9992.9	0.279058	0	Post-Orogenic	Acid Volcanic Rocks	6	0	0	0	0
FUL2020_MbgW	S280WTS013	MbgW	Fulop	2020	10.1126/sciadv.aaz8845	440430	15130	2467560	163530	5.60262	0.0746464	9.68	0.343	0.681	11.9	0.827	1.35	0.813445	0.0780079	0.133488	1	1	-35.4595	148.604	-35.0934	147.367	929.07	27853.1	715.85	718.552	718.338	718.445	12.3866	11.3265	10.9428	11.552	239.447	152.794	829.169	5744.89	0.592337	0	Post-Orogenic	Acid Plutonic Rocks	12	0	0	0	0
FUL2020_McnB	S280WTS027	McnB	Fulop	2020	10.1126/sciadv.aaz8845	386970	10140	2280570	125790	5.8934	0.0610651	8.61	0.234	0.576	9.97	0.583	1.08	0.863591	0.0644826	0.127318	1	1	-28.9806	151.341	-28.5729	150.344	944.39	22769.7	600.08	602.472	602.256	602.364	7.27146	6.05932	6.16019	6.49699	133.336	89.5944	767.28	4357.78	0.897398	0	Post-Orogenic	Mixed Sedimentary Rocks	11	0	0	0	0
FUL2020_McqD	S280WTS028	McqD	Fulop	2020	10.1126/sciadv.aaz8845	478260	13350	2691030	154540	5.62671	0.0638524	7.89	0.229	0.535	9.6	0.585	1.05	0.821875	0.0674965	0.128688	1	1	-33.0472	149.346	-32.2036	148.615	937.36	19747.5	670.44	672.351	672.548	672.449	10.2259	8.11399	7.67975	8.6732	175.099	91.4786	757.112	4734.13	0.808836	0	Post-Orogenic	Mixed Sedimentary Rocks	11	0	0	0	0
FUL2020_MrnM	S280WTS029	MrnM	Fulop	2020	10.1126/sciadv.aaz8845	215750	5810	1379700	77520	6.3949	0.0623063	14.2	0.39	0.94	15.2	0.89	1.63	0.934211	0.064674	0.126023	1	0	-25.7024	147.866	-26.4824	147.977	952.82	11696.5	543.2	545.579	545.529	545.554	4.55507	3.72076	3.46139	3.91241	78.7642	55.3713	601.976	2852.23	0.956728	0	Post-Orogenic	Mixed Sedimentary Rocks	5	0	0	0	0
FUL2020_MrrB	S280WTS030	MrrB	Fulop	2020	10.1126/sciadv.aaz8845	721130	19370	3546100	189330	4.91742	0.059767	3.15	0.0928	0.224	4.36	0.264	0.501	0.722477	0.067337	0.135132	1	1	-31.2623	147.753	-30.4009	147.176	993.69	4759	190.14	190.418	190.34	190.379	1.24714	0.481844	0.476498	0.735162	12.4665	10.4011	486.789	2357.59	0.878294	0	Post-Orogenic	Unconsolidated Sediments	6	0	0	0	0
FUL2020_MrtC	S280WTS031	MrtC	Fulop	2020	10.1126/sciadv.aaz8845	585070	15720	2835710	153410	4.84679	0.0604041	3.99	0.115	0.278	5.66	0.338	0.635	0.704947	0.0663089	0.132065	1	1	-31.1787	148.022	-30.4565	147.684	993.65	6614.57	191.34	191.681	191.683	191.682	1.15917	0.39542	0.40783	0.654139	10.5617	5.61224	506.874	2425.65	0.897558	0	Post-Orogenic	Unconsolidated Sediments	4	0	0	0	0
FUL2020_Mry-Drl	S280WTS037	Mry-Drl	Fulop	2020	10.1126/sciadv.aaz8845	446900	16230	1745110	99550	3.90492	0.0676244	5.87	0.224	0.428	10.6	0.641	1.16	0.553774	0.0715054	0.131499	1	1	-31.1367	146.459	-34.1103	141.18	981.93	1.00082e+06	271.88	272.825	272.811	272.818	3.36287	2.73945	2.71582	2.93938	59.7072	104.504	502.319	2656.79	0.849008	0	Post-Orogenic	Unconsolidated Sediments	13	0	0	0	0
FUL2020_MryAW	S280WTS014	MryAW	Fulop	2020	10.1126/sciadv.aaz8845	305280	15650	1600620	169870	5.24312	0.117861	20.7	1.07	1.64	27.5	2.98	3.83	0.752727	0.120061	0.160231	1	1	-36.7302	148.107	-36.4881	148.125	880.01	990.452	1167.76	1175.22	1175.23	1175.22	25.3572	27.5546	28.4444	27.1188	558.509	168.912	1185.2	9991.38	0.287679	0	Post-Orogenic	Mixed Sedimentary Rocks	9	0	0	0	0
FUL2020_MryL	S280WTS015	MryL	Fulop	2020	10.1126/sciadv.aaz8845	393250	11030	1715500	101180	4.36236	0.0653095	7.56	0.221	0.514	12.2	0.754	1.33	0.619672	0.0683681	0.12848	1	1	-34.7807	146.101	-34.755	142.533	977.03	287500	298.76	300.161	300.103	300.132	5.47266	4.74248	4.65127	4.95547	101.697	155.746	576.769	3507.1	0.724826	0	Post-Orogenic	Unconsolidated Sediments	13	0	0	0	0
FUL2020_PPC	S280WTS002	PPC	Fulop	2020	10.1126/sciadv.aaz8845	521970	23790	3165630	182850	6.06477	0.0735774	18	0.834	1.36	20.4	1.21	2.17	0.882353	0.0752655	0.130475	1	0	-36.4032	148.426	-36.3931	148.435	822.08	3.63565	1749.25	1750.8	1757.25	1754.03	13.3634	7.64721	11.6915	10.9007	447.103	166.243	1713.75	15882.8	NaN	0	Post-Orogenic	Acid Plutonic Rocks	1	0	0	0	0
FUL2020_ProE	S280WTS032	ProE	Fulop	2020	10.1126/sciadv.aaz8845	731180	19640	2846440	251380	3.89294	0.0923083	3.02	0.0893	0.216	5.48	0.536	0.749	0.551095	0.102182	0.154262	1	1	-27.1572	145.171	-28.1621	145.031	986.88	16891.9	244.5	244.633	244.608	244.621	1.47629	1.20596	1.2713	1.31785	26.7837	14.4932	382.264	1564.86	0.953698	0	Post-Orogenic	Unconsolidated Sediments	3	0	0	0	0
FUL2020_ProW	S280WTS033	ProW	Fulop	2020	10.1126/sciadv.aaz8845	871040	23390	3999090	203940	4.59117	0.0576345	2.4	0.0726	0.175	3.56	0.212	0.415	0.674157	0.0667932	0.137499	1	1	-27.8726	144.833	-29.696	144.162	991.76	35258.5	203.32	203.399	203.401	203.4	1.33921	1.04878	1.1246	1.17086	23.2859	15.6624	352.857	1448.27	0.945198	0	Post-Orogenic	Unconsolidated Sediments	4	0	0	0	0
FUL2020_SnwCP	S280WTS003	SnwCP	Fulop	2020	10.1126/sciadv.aaz8845	586610	31440	3401760	185020	5.79901	0.0763594	18.6	1.01	1.51	22	1.23	2.29	0.845455	0.0779387	0.132006	1	0	-36.4458	148.292	-36.4309	148.319	801.29	20.6773	1968.04	1971.52	1970.4	1970.96	14.816	13.995	11.4679	13.4263	354.707	90.3766	1943.67	19699.7	0.217404	0	Post-Orogenic	Acid Plutonic Rocks	2	0	0	0	0
FUL2020_SnwMK	S280WTS004	SnwMK	Fulop	2020	10.1126/sciadv.aaz8845	330120	16030	1971570	273120	5.97228	0.146793	37	1.81	2.85	42.6	5.99	7.05	0.868545	0.148877	0.182541	0	0	-36.4558	148.269	-36.455	148.27	785.13	0.102649	2138.03	2124.33	2101.03	2112.68	23.5736	9.91204	14.5536	16.0131	345	9.89949	2011.37	20743.5	NaN	0	Post-Orogenic	Acid Plutonic Rocks	1	0	0	0	0
FUL2020_SPC	S280WTS005	SPC	Fulop	2020	10.1126/sciadv.aaz8845	653010	31030	4258120	241990	6.52076	0.0740789	15.4	0.746	1.19	16.1	0.95	1.72	0.956522	0.0763434	0.131849	0	0	-36.4321	148.359	-36.4273	148.356	812.46	20.3209	1840	1840.95	1843.52	1842.24	16.6862	12.6293	12.4387	13.9181	456.009	163.197	1828.73	17644.3	0.336486	0	Post-Orogenic	Acid Plutonic Rocks	1	0	0	0	0
FUL2020_SWP	S280WTS016	SWP	Fulop	2020	10.1126/sciadv.aaz8845	234640	12120	1453170	88460	6.19319	0.0798356	33.6	1.75	2.66	37.7	2.33	4.03	0.891247	0.0808231	0.13302	1	0	-36.3192	148.295	-36.3861	148.182	846.92	373.403	1452.85	1455.95	1457.17	1456.56	29.2183	31.623	36.2075	32.3496	684.639	327.236	1553.76	14101.4	0.204093	0	Post-Orogenic	Acid Plutonic Rocks	6	0	0	0	0
FUL2020_TBW	S280WTS034	TBW	Fulop	2020	10.1126/sciadv.aaz8845	421700	11040	1932610	108340	4.5829	0.0618707	5.35	0.148	0.365	8.14	0.489	0.896	0.657248	0.0661372	0.129502	1	1	-29.1536	148.159	-30.0232	147.525	997.82	5721.48	155	155.056	155.038	155.047	1.41287	0.4205	0.375787	0.736384	10.468	7.77585	474.352	2105.03	0.93766	0	Post-Orogenic	Unconsolidated Sediments	3	0	0	0	0
FUL2020_WrgD	S280WTS035	WrgD	Fulop	2020	10.1126/sciadv.aaz8845	309470	8330	1674170	151020	5.4098	0.0941362	8.95	0.249	0.6	11.4	1.08	1.49	0.785088	0.0987375	0.146892	1	1	-25.6993	146.458	-26.8413	146.038	964.97	39905.7	431.34	432.472	432.511	432.492	2.14316	1.81933	1.8079	1.92346	39.7377	33.2398	513.311	2215.41	0.968135	0	Post-Orogenic	Unconsolidated Sediments	5	0	0	0	0
FUL2020_WrgG	S280WTS036	WrgG	Fulop	2020	10.1126/sciadv.aaz8845	618050	16610	2692390	163630	4.35627	0.0664519	3.46	0.101	0.244	5.53	0.372	0.645	0.625678	0.0733299	0.136298	1	1	-28.9345	145.679	-29.9857	145.39	998.26	5400.79	148.4	148.344	148.352	148.348	0.9075	0.355212	0.342099	0.534937	8.76668	6.6967	365.601	1556.7	0.891732	0	Post-Orogenic	Unconsolidated Sediments	3	0	0	0	0
GRA1996_A-4_a	S001WTS001	A-4_a	Granger	1996	10.1086/629823	126588	9042	940000	100000	7.42566	0.128138	68.8	4.93	6.4	64.8	6.96	8.94	1.06173	0.129117	0.166394	0	0	40.0888	-120.061	40.0941	-120.06	843.83	0.361478	1524.1	1525.27	1510.97	1518.12	22.4779	30.8855	31.3594	28.2409	533.333	59.0104	334.351	1913.87	NaN	38.3356	Active	Acid Plutonic Rocks	2	0	0	0	0
GRA1996_A-4_b	S001WTS002	A-4_b	Granger	1996	10.1086/629823	108504	9042	670000	150000	6.17489	0.238887	80	6.69	8.2	90.4	20.4	21.8	0.884956	0.24066	0.26203	0	0	40.0888	-120.061	40.0941	-120.06	843.83	0.361478	1524.1	1525.27	1510.97	1518.12	22.4779	30.8855	31.3594	28.2409	533.333	59.0104	334.351	1913.87	NaN	38.3356	Active	Acid Plutonic Rocks	2	0	0	0	0
GRA1996_A-4_d	S001WTS003	A-4_d	Granger	1996	10.1086/629823	135630	9042	780000	700000	5.75094	0.899909	64.2	4.3	5.75	78	70.5	70.8	0.823077	0.906324	0.9121	0	0	40.0888	-120.061	40.0941	-120.06	843.83	0.361478	1524.1	1525.27	1510.97	1518.12	22.4779	30.8855	31.3594	28.2409	533.333	59.0104	334.351	1913.87	NaN	38.3356	Active	Acid Plutonic Rocks	2	0	0	0	0
GRA1996_B-5_a	S001WTS004	B-5_a	Granger	1996	10.1086/629823	262218	9042	1540000	110000	5.87298	0.0793165	32.7	1.14	2.26	38.7	2.81	4.39	0.844961	0.0805455	0.132833	1	0	40.0889	-120.067	40.0972	-120.065	847.15	0.666532	1480.38	1477.25	1465.41	1471.33	19.7582	22.9442	27.5602	23.4208	470.556	20.608	334.373	1906.79	NaN	38.3356	Active	Acid Plutonic Rocks	2	0	0	0	0
GRA1996_B-5_b	S001WTS005	B-5_b	Granger	1996	10.1086/629823	171798	18084	1240000	80000	7.21778	0.123461	49.8	5.28	6.05	48.2	3.15	5.24	1.0332	0.124548	0.163026	0	0	40.0889	-120.067	40.0972	-120.065	847.15	0.666532	1480.38	1477.25	1465.41	1471.33	19.7582	22.9442	27.5602	23.4208	470.556	20.608	334.373	1906.79	NaN	38.3356	Active	Acid Plutonic Rocks	2	0	0	0	0
GRA1996_B-5_c	S001WTS006	B-5_c	Granger	1996	10.1086/629823	189882	18084	1210000	80000	6.37238	0.115938	45.1	4.33	5.09	49.4	3.3	5.42	0.912955	0.116962	0.157401	0	0	40.0889	-120.067	40.0972	-120.065	847.15	0.666532	1480.38	1477.25	1465.41	1471.33	19.7582	22.9442	27.5602	23.4208	470.556	20.608	334.373	1906.79	NaN	38.3356	Active	Acid Plutonic Rocks	2	0	0	0	0
GRA1996_B-5_d	S001WTS007	B-5_d	Granger	1996	10.1086/629823	162756	9042	1010000	50000	6.20561	0.0744121	52.6	2.94	4.28	59	2.95	5.91	0.891525	0.0749939	0.129054	1	0	40.0889	-120.067	40.0972	-120.065	847.15	0.666532	1480.38	1477.25	1465.41	1471.33	19.7582	22.9442	27.5602	23.4208	470.556	20.608	334.373	1906.79	NaN	38.3356	Active	Acid Plutonic Rocks	2	0	0	0	0
GRI2018_mod5001	S230WTS013	mod5001	Grin	2018	10.1016/j.geomorph.2018.08.007	38720	1880	201700	17000	5.20919	0.0972686	571	27.7	43.7	743	62.6	89.5	0.768506	0.097221	0.142714	1	1	39.2148	70.1527	39.035	70.1888	689.49	1748.15	3064.78	3083.03	3084.1	3083.56	49.0228	61.0692	62.5158	57.5359	1302.76	318.291	579.389	5430.25	0.398537	38.6408	Active	Mixed Sedimentary Rocks	7	0	0	112.1	6.41
GRI2018_mod5003	S230WTS018	mod5003	Grin	2018	10.1016/j.geomorph.2018.08.007	70210	2630	482000	40000	6.86512	0.0910501	404	15.1	28.2	402	33.4	48.1	1.00498	0.0911045	0.138524	0	0	39.4363	71.4146	39.2962	71.2321	655.62	525.57	3508.47	3523.3	3531.66	3527.48	41.578	47.4672	45.6468	44.8973	997.828	292.724	677.68	7158.6	0.421796	78.3821	Active	Mixed Sedimentary Rocks	5	0	0	63.4	12.06
GRI2018_mod5004	S230WTS017	mod5004	Grin	2018	10.1016/j.geomorph.2018.08.007	15420	1100	102800	17000	6.66667	0.1801	1600	114	148	1630	270	304	0.981595	0.180318	0.208182	0	0	39.3996	71.1929	39.296	71.2263	660.62	635.372	3431.83	3452.61	3455.31	3453.96	48.0626	57.7557	57.0525	54.2903	1268.67	331.514	668.983	7001.44	0.41253	75.1219	Active	Mixed Sedimentary Rocks	3	0	0	101.2	15.93
GRI2018_mod6001	S230WTS021	mod6001	Grin	2018	10.1016/j.geomorph.2018.08.007	16760	1000	123300	16500	7.3568	0.146519	1450	86.6	122	1360	182	216	1.06618	0.146546	0.179733	0	0	38.7912	71.0874	38.8596	70.1036	660.93	6557.52	3364.3	3381.9	3381.99	3381.95	43.1804	52.878	54.3994	50.1526	1142.09	335.925	729.163	7422.31	0.408218	83.2136	Active	Mixed Sedimentary Rocks	9	311.371	4.74831	1141.8	17.41
GRI2018_mod6002	S230WTS019	mod6002	Grin	2018	10.1016/j.geomorph.2018.08.007	19050	1110	125100	17800	6.56693	0.153755	1310	76.4	109	1360	193	226	0.963235	0.153428	0.185844	0	0	39.415	71.2919	39.2438	71.2279	662.08	1205.6	3426.63	3445.67	3450.43	3448.05	45.1252	53.3315	52.2583	50.2383	1147.6	338.355	667.444	6966	0.408288	77.5847	Active	Mixed Sedimentary Rocks	5	0	0	164.6	13.65
GRI2018_mod6004	S230WTS022	mod6004	Grin	2018	10.1016/j.geomorph.2018.08.007	25150	1470	190800	27900	7.58648	0.157475	1630	95.5	136	1470	215	249	1.10884	0.157557	0.188822	0	0	39.0213	72.3247	39.1737	71.5563	580.26	6609.45	4469.67	4488.42	4490.5	4489.46	45.7842	58.626	60.0572	54.8225	1283.07	388.851	744.541	10067.3	0.474487	84.658	Active	Intermediate Volcanic Rocks	9	2917.2	44.1368	2886.2	43.67
GRI2018_mod6005	S230WTS007	mod6005	Grin	2018	10.1016/j.geomorph.2018.08.007	23010	1760	157500	17600	6.84485	0.135417	1410	108	137	1400	157	198	1.00714	0.135805	0.171589	0	0	39.2596	72.4264	39.2687	71.3761	619.97	15195	3900.94	3916.37	3917.5	3916.94	37.2417	44.6507	45.9269	42.6064	968.689	500.381	591.48	7262.94	0.475427	115.933	Active	Mixed Sedimentary Rocks	9	3390.02	22.3102	3586.9	23.61
GRI2018_mod7003	S230WTS002	mod7003	Grin	2018	10.1016/j.geomorph.2018.08.007	16890	1290	107100	18900	6.34103	0.192289	1580	121	153	1680	297	331	0.940476	0.19266	0.219535	0	0	39.1587	71.6745	38.8505	69.9637	647.28	29018	3512.98	3530.01	3530.82	3530.41	40.118	48.4067	49.9113	46.1453	1045.44	442.585	630.718	6881.23	0.436977	100.275	Active	Mixed Sedimentary Rocks	10	3701.4	12.7556	5153.7	17.76
GRI2018_mod7005	S230WTS004	mod7005	Grin	2018	10.1016/j.geomorph.2018.08.007	23120	1520	138200	22200	5.97751	0.17357	1290	84.6	114	1440	232	263	0.895833	0.173947	0.202896	0	0	39.2472	72.0964	39.0154	70.3704	635.16	19570.3	3676.34	3692.71	3693.61	3693.16	38.391	46.0761	47.4958	43.9876	996.908	474.997	599.854	6923.98	0.453055	111.413	Active	Mixed Sedimentary Rocks	10	3390.03	17.3223	3887.7	19.87
GRI2018_mod7006	S230WTS005	mod7006	Grin	2018	10.1016/j.geomorph.2018.08.007	21950	1820	102400	17100	4.66515	0.186444	1430	119	146	1990	333	374	0.718593	0.186887	0.213882	1	0	39.2562	72.3128	39.1571	71.0871	624.91	16872.3	3831	3846.83	3847.9	3847.37	37.7446	45.1427	46.3302	43.0725	978.549	488.244	595.687	7167.32	0.466548	112.283	Active	Mixed Sedimentary Rocks	10	3390.03	20.0923	3757.9	22.27
HAT2019_C2	S242WTS001	C2	Hattanji	2019	10.1016/j.geomorph.2018.12.022	55900	5600	378000	37000	6.76208	0.140061	56.4	5.68	6.59	58.8	5.82	7.74	0.959184	0.141207	0.17601	0	0	36.4997	139.666	36.5011	139.663	980.235	0.176479	0	288.288	294	291.144	31.3864	18.055	20.4287	23.29	435.333	16.5798	1336.26	12818.5	NaN	25.9157	Active	Siliciclastic Sedimentary Rocks	1	0	0	0	0
HAT2019_S2	S242WTS002	S2	Hattanji	2019	10.1016/j.geomorph.2018.12.022	41700	7900	436000	46000	10.4556	0.216845	73.8	14	14.7	50	5.34	6.89	1.476	0.217699	0.242207	2	2	36.4318	139.637	36.4314	139.639	983.498	0.0977423	0	249.646	218.562	234.104	10.5473	11.4796	7.79038	9.9391	327.785	12.2659	1321.12	12096.8	NaN	21.8067	Active	Basic Volcanic Rocks	1	0	0	0	0
HAT2019_S3	S242WTS003	S3	Hattanji	2019	10.1016/j.geomorph.2018.12.022	58900	3700	499000	42000	8.47199	0.105026	51.4	3.25	4.46	42.7	3.64	5.21	1.20375	0.106136	0.149722	2	0	36.4318	139.643	36.4323	139.643	986.966	0.00840366	0	241	223	232	18.3933	5.60687	7.03241	10.3442	282	0	1311	12067	NaN	21.8067	Active	Siliciclastic Sedimentary Rocks	1	0	0	0	0
HEI1997_Creek1a	S002WTS001	Creek1a	Heimsath	1997	10.1038/41056	56964.6	4521	414000	53000	7.26767	0.150625	55.1	4.4	5.48	53.6	6.94	8.36	1.02799	0.152122	0.184981	0	0	37.8623	-122.552	37.8607	-122.549	989.85	0.177482	225.45	210.629	186.688	198.658	21.3594	15.6315	8.77734	15.2561	275.667	6.3421	1075.67	7691.72	NaN	343.525	Active	Metamorphic Rocks	1	0	0	0	0
HEI1997_Creek1b	S002WTS002	Creek1b	Heimsath	1997	10.1038/41056	56964.6	5425.2	366000	50000	6.42504	0.166533	55.1	5.28	6.21	60.7	8.37	9.89	0.907743	0.167918	0.198114	0	0	37.8623	-122.552	37.8607	-122.549	989.85	0.177482	225.45	210.629	186.688	198.658	21.3594	15.6315	8.77734	15.2561	275.667	6.3421	1075.67	7691.72	NaN	343.525	Active	Metamorphic Rocks	1	0	0	0	0
HEI1997_Creek2	S002WTS003	Creek2	Heimsath	1997	10.1038/41056	37072.2	4521	239000	49000	6.44688	0.238549	85.9	10.5	11.7	94.7	19.5	21.2	0.907075	0.239461	0.262044	0	0	37.8655	-122.55	37.8632	-122.547	988.27	0.244285	237.23	208.386	182.103	195.244	25.6311	17.8513	7.06021	16.8475	263.25	2.58602	1070.94	7655.13	NaN	343.525	Active	Metamorphic Rocks	1	0	0	0	0
HID2014_1 modern post-dam	S153WTS001	1 modern post-dam	Hidy	2014	10.1016/j.epsl.2014.01.011	214000	6000	1166000	70000	5.4486	0.0662587	16.8	0.48	1.12	21.5	1.33	2.32	0.781395	0.0681399	0.12684	1	1	32.209	-99.3392	29.6747	-96.025	946.52	116252	531.23	531.506	530.63	531.068	2.19021	1.76756	1.78812	1.91529	38.5478	21.689	702.834	3555.91	0.941282	0	Post-Orogenic	Unconsolidated Sediments	4	0	0	0	0
HID2014_12 modern pre-dam	S153WTS004	12 modern pre-dam	Hidy	2014	10.1016/j.epsl.2014.01.011	84000	3000	513000	40000	6.10714	0.0857628	32.2	1.16	2.24	37	2.93	4.36	0.87027	0.0869984	0.13684	1	0	32.0158	-96.5872	30.274	-94.7983	994.85	44746.6	171.75	172.32	171.332	171.826	2.13396	1.61827	1.57535	1.77586	35.3329	13.6187	977.408	5591.09	0.892023	0	Post-Orogenic	Unconsolidated Sediments	4	0	0	0	0
HID2014_6 modern post-dam	S153WTS002	6 modern post-dam	Hidy	2014	10.1016/j.epsl.2014.01.011	252000	8000	1489000	100000	5.90873	0.0742843	15.5	0.501	1.06	18.1	1.26	2.04	0.856354	0.0767513	0.131832	1	0	31.7458	-100.521	29.6175	-96.42	932.46	107261	689.39	689.707	688.738	689.222	2.407	1.94587	1.97248	2.10845	42.2715	26.6979	582.289	2743.91	0.935637	0	Post-Orogenic	Unconsolidated Sediments	9	0	0	0	0
HID2014_8 modern pre-dam	S153WTS003	8 modern pre-dam	Hidy	2014	10.1016/j.epsl.2014.01.011	223000	6000	1388000	84000	6.22422	0.0662302	17.6	0.482	1.16	19.6	1.22	2.12	0.897959	0.0680032	0.126662	1	0	31.7752	-100.557	29.7306	-96.5391	932	106272	694.81	695.128	694.179	694.654	2.41211	1.95086	1.97817	2.11372	42.381	26.7854	578.218	2713.64	0.9362	0	Post-Orogenic	Unconsolidated Sediments	9	0	0	0	0
HIP2012_sample_18-2	S078WTS001	sample_18-2	Hippe	2012	10.1016/j.geomorph.2012.07.031	1830118	75160	18740000	1010000	10.2398	0.0677593	14	0.588	1.03	9	0.517	0.974	1.55556	0.0711608	0.130862	2	2	-16.4512	-68.2162	-16.6359	-68.312	612.42	316.754	4203.15	4212.32	4206.6	4209.46	7.8413	9.404	10.1693	9.13819	210.496	221.551	647.605	4658.7	0.502525	24.7466	Active	Mixed Sedimentary Rocks	1	43.7554	13.8137	3.3	1.04
HIP2012_sample_18-4	S078WTS002	sample_18-4	Hippe	2012	10.1016/j.geomorph.2012.07.031	7853660	235688	45690000	2070000	5.81767	0.0543431	3.43	0.112	0.247	3.68	0.194	0.416	0.932065	0.0620109	0.134032	1	0	-16.4251	-68.1973	-16.5657	-68.3041	604.25	226.227	4315.98	4327.85	4317.45	4322.65	10.316	12.2587	13.014	11.8629	269.843	234.797	667.342	4862.53	0.475725	24.7466	Active	Mixed Sedimentary Rocks	1	43.7554	19.3414	3.3	1.45
HIP2012_sample_18-7	S078WTS005	sample_18-7	Hippe	2012	10.1016/j.geomorph.2012.07.031	4765080	142987	30180000	1560000	6.33358	0.0597685	4.58	0.146	0.323	4.57	0.267	0.519	1.00219	0.0665553	0.133683	0	0	-16.662	-68.2379	-16.6821	-68.2737	638.84	7.47296	3889.01	3889.62	3885.88	3887.75	1.29522	1.93488	2.34361	1.8579	43.4622	18.8492	561	3830.71	NaN	29.7439	Active	Mixed Sedimentary Rocks	1	0	0	0	0
HIP2012_sample_22-6	S078WTS008	sample_22-6	Hippe	2012	10.1016/j.geomorph.2012.07.031	4268273	153961	28140000	1570000	6.59283	0.0664373	5.76	0.219	0.419	5.56	0.343	0.631	1.03597	0.072466	0.134801	0	0	-16.9541	-68.0721	-17.0477	-68.0909	622.23	244.432	4099.61	4103.89	4104.09	4103.99	8.78451	8.19475	8.52371	8.50099	190.254	106.461	490.674	3257.81	0.552321	32.0095	Active	Mixed Sedimentary Rocks	4	0	0	0	0
HIP2012_sample_24-1	S078WTS009	sample_24-1	Hippe	2012	10.1016/j.geomorph.2012.07.031	4600448	138193	28290000	1460000	6.1494	0.059714	5.51	0.175	0.385	5.72	0.326	0.633	0.963287	0.0652451	0.130877	0	0	-17.0357	-67.949	-17.1064	-67.9913	617.43	38.0077	4157.25	4164.13	4165.69	4164.91	13.7223	10.11	10.8262	11.5529	287.406	127.065	478.938	3193.67	0.537615	29.566	Active	Mixed Sedimentary Rocks	1	0	0	0	0
HIP2012_sample_24-2	S078WTS010	sample_24-2	Hippe	2012	10.1016/j.geomorph.2012.07.031	4842995	145357	32980000	1400000	6.80984	0.0519888	5.13	0.163	0.36	4.76	0.227	0.513	1.07773	0.0573047	0.128607	2	0	-17.0519	-67.9293	-17.1233	-67.9603	620.19	26.9535	4090.44	4102.26	4093.27	4097.77	12.4673	9.31132	10.3748	10.7178	284.556	194.134	458	3030.03	0.544051	29.5266	Active	Mixed Sedimentary Rocks	1	0	0	0	0
HIP2012_sample_24-3	S078WTS011	sample_24-3	Hippe	2012	10.1016/j.geomorph.2012.07.031	1364642	90220	8650000	69000	6.33866	0.0665921	20.1	1.35	1.81	20.9	0.171	1.85	0.961722	0.0676607	0.12627	0	0	-17.2164	-67.8136	-17.2691	-67.8595	600.83	39.4225	4374.86	4386.92	4380.65	4383.79	24.3973	23.7619	20.5315	22.8969	477.79	103.056	500.157	3458.31	0.533625	30.5642	Active	Mixed Sedimentary Rocks	1	0	0	0	0
HIP2012_sample_24-4	S078WTS012	sample_24-4	Hippe	2012	10.1016/j.geomorph.2012.07.031	954914	31660	8310000	540000	8.70235	0.0729513	28.2	0.945	1.93	21.7	1.45	2.4	1.29954	0.0747523	0.130062	2	2	-17.221	-67.7797	-17.2941	-67.8103	600.55	31.5616	4334.72	4342.98	4337.44	4340.21	26.1107	22.0388	19.9684	22.706	454.073	82.5639	501.846	3492.49	0.500876	31.0879	Active	Mixed Sedimentary Rocks	1	0	0	0	0
HIP2012_sample_24-6	S078WTS014	sample_24-6	Hippe	2012	10.1016/j.geomorph.2012.07.031	4109264	123333	29850000	1710000	7.26407	0.0646726	5.99	0.189	0.417	5.23	0.334	0.602	1.14532	0.0712318	0.13452	2	2	-17.3128	-67.6384	-17.3856	-67.6335	622.58	102.267	4098.88	4103.83	4107.44	4105.63	14.4511	14.0001	14.3313	14.2608	320.55	110.488	454.748	3151.76	0.520626	32.4366	Active	Mixed Sedimentary Rocks	3	0	0	0	0
HIP2012_sample_25-2	S078WTS016	sample_25-2	Hippe	2012	10.1016/j.geomorph.2012.07.031	1938420	62111	12670000	710000	6.53625	0.0645518	14.1	0.462	0.967	14.1	0.826	1.51	1	0.0671223	0.12717	0	0	-17.2069	-67.2985	-17.2824	-67.3097	603.67	112.702	4339.54	4344.78	4345.73	4345.26	12.315	11.1551	12.9561	12.1421	294.836	86.8594	577.741	4002.34	0.490907	32.8035	Active	Mixed Sedimentary Rocks	1	0	0	0	0
HIP2012_sample_25-3	S078WTS017	sample_25-3	Hippe	2012	10.1016/j.geomorph.2012.07.031	5687003	216146	39930000	2260000	7.02127	0.0681761	4.45	0.181	0.334	3.94	0.257	0.467	1.12944	0.0768709	0.140294	2	0	-17.291	-67.4325	-17.3301	-67.3917	617.18	74.6338	4175.54	4177.21	4178.51	4177.86	7.49334	8.31203	9.35197	8.38578	205.356	124.569	501.744	3426.48	0.552543	33.1082	Active	Mixed Sedimentary Rocks	1	0	0	0	0
HIP2012_sample_25-4	S078WTS018	sample_25-4	Hippe	2012	10.1016/j.geomorph.2012.07.031	2681324	80490	17600000	1010000	6.56392	0.0647636	8.98	0.279	0.615	8.89	0.544	0.98	1.01012	0.0686279	0.129778	0	0	-17.2724	-67.5533	-17.3682	-67.5617	625.54	176.124	4063.75	4070.02	4068.78	4069.4	11.1761	11.6054	12.4095	11.7303	270.384	84.8499	463.586	3207.53	0.551885	33.1207	Active	Mixed Sedimentary Rocks	2	0	0	0	0
HUB2021_L1	S302WTS001	L1	Hubert-Ferrari	2021	10.1007/s42990-021-00057-6	150505	2272	44697	34742	0.29698	0.777425	46.3	0.704	2.84	1080	836	841	0.0428704	0.774223	0.781116	1	0	39.5708	34.9227	41.1097	34.7335	873.23	68607.6	1216.97	1215.03	1215.31	1215.17	11.6813	11.5014	12.3493	11.844	247.26	154.486	439.519	3109.33	0.576081	65.6872	Active	Siliciclastic Sedimentary Rocks	13	6.95324	0.0101348	0	0
HUB2021_L10	S302WTS008	L10	Hubert-Ferrari	2021	10.1007/s42990-021-00057-6	16786	4864	84977	49248	5.06237	0.647948	542	157	160	754	437	442	0.718833	0.647932	0.656341	0	0	40.9955	33.7357	40.9077	33.6533	837.24	180.052	1559.07	1551.69	1552.31	1552	27.1482	30.2404	31.336	29.5749	613.037	161.338	586.65	5027.52	0.279046	206.817	Active	Metamorphic Rocks	6	0	0	0	0
HUB2021_L2	S302WTS002	L2	Hubert-Ferrari	2021	10.1007/s42990-021-00057-6	52693	8970	86702	43605	1.64542	0.530958	122	20.7	21.9	532	268	272	0.229323	0.531566	0.541875	1	0	41.1084	34.8616	41.1245	34.7769	887.69	76.4954	1112.18	1103.54	1080.23	1091.88	29.7036	34.7817	38.3307	34.272	696.849	124.455	550.615	4478.95	0.287001	273.132	Active	Metamorphic Rocks	3	0	0	0	0
HUB2021_L5	S302WTS003	L5	Hubert-Ferrari	2021	10.1007/s42990-021-00057-6	37050	4849	69295	49123	1.87031	0.720877	205	26.8	29.4	782	555	559	0.262148	0.721659	0.729078	1	0	40.8195	33.6517	41.0902	34.3784	861.56	3286.27	1323.03	1319.09	1319.7	1319.4	19.4673	19.7481	21.4917	20.2357	422.035	191.599	548.393	4360.69	0.363745	194.263	Active	Intermediate Volcanic Rocks	8	0	0	0	0
HUB2021_L6	S302WTS004	L6	Hubert-Ferrari	2021	10.1007/s42990-021-00057-6	11702	1612	20939	12135	1.78935	0.595687	563	77.6	84.4	2170	1260	1270	0.259447	0.59678	0.604148	1	0	41.1005	34.2571	41.0483	34.2587	885.41	40.886	1103.5	1091.91	1069.49	1080.7	22.5354	26.0769	32.299	26.9704	563.699	137.576	541.607	4271.11	0.453445	234.097	Active	Basic Plutonic Rocks	4	0	0	0	0
HUB2021_L8	S302WTS006	L8	Hubert-Ferrari	2021	10.1007/s42990-021-00057-6	25972	1791	173033	77873	6.66229	0.4553	259	17.9	23.5	275	124	126	0.941818	0.456175	0.467079	0	0	41.0771	34.0853	41.0102	34.1274	880.76	42.9475	1150.36	1129.8	1150.93	1140.37	23.2494	24.4161	26.8266	24.8307	521.107	143.345	537.797	4291.77	0.505149	262.295	Active	Metamorphic Rocks	2	0	0	0	0
INS2010_Ins-N04	S061WTS002	Ins-N04	Insel	2010	10.1016/j.geomorph.2010.05.014	32912.9	1627.56	172300	37000	5.23503	0.220362	120	5.94	9.24	159	34.3	37	0.754717	0.22133	0.245113	1	0	-15.5099	-67.0239	-15.384	-67.1152	889	332.174	1114.05	1111.13	1114.5	1112.82	25.5322	23.9166	20.9666	23.4718	495.188	89.5508	1798.91	11682.7	0.136732	30.445	Active	Mixed Sedimentary Rocks	2	0	0	0	0
INS2010_Ins-N05	S061WTS004	Ins-N05	Insel	2010	10.1016/j.geomorph.2010.05.014	46204.6	3164.7	316800	47300	6.85646	0.164266	83.8	5.76	7.61	85.8	12.9	14.9	0.97669	0.165316	0.19597	0	0	-15.5505	-67.0884	-15.5051	-67.1689	895.43	205.512	1042.07	1044.84	1035.55	1040.19	24.767	27.0189	29.2331	27.0063	570.234	131.866	1776.98	11322.9	0.132061	32.3312	Active	Mixed Sedimentary Rocks	2	0	0	0	0
INS2010_Ins-N06	S061WTS005	Ins-N06	Insel	2010	10.1016/j.geomorph.2010.05.014	49459.7	1898.82	238200	36800	4.81604	0.159191	95.2	3.67	6.72	136	21.2	24.2	0.7	0.160578	0.191431	1	0	-15.7088	-67.4114	-15.6794	-67.427	860.69	34.237	1398.27	1393.61	1406.44	1400.03	34.9052	36.7641	34.6652	35.4448	727.716	142.236	1599.17	10628.6	0.139149	39.3872	Active	Mixed Sedimentary Rocks	1	0	0	0	0
INS2010_Ins-S08	S061WTS014	Ins-S08	Insel	2010	10.1016/j.geomorph.2010.05.014	14738.5	1175.46	58500	23600	3.96921	0.411227	265	21.1	26.3	473	191	195	0.560254	0.411581	0.42404	1	0	-19.5149	-63.3089	-19.5212	-63.2503	889.83	129.792	1105.52	1103.66	1101.5	1102.58	23.5765	18.6073	17.808	19.9973	406.471	122.387	671.685	3823.95	0.77553	24.9953	Active	Mixed Sedimentary Rocks	1	0	0	0	0
INS2010_Ins-S09	S061WTS015	Ins-S09	Insel	2010	10.1016/j.geomorph.2010.05.014	14105.5	1175.46	52900	29600	3.7503	0.565718	283	23.6	28.9	541	303	307	0.523105	0.566248	0.576583	0	0	-19.7492	-63.2818	-19.7883	-63.2287	885.23	152.786	1145.33	1144.7	1148.08	1146.39	26.395	22.0458	23.7265	24.0557	475.213	139.636	656.592	3779.62	0.786824	22.8979	Active	Mixed Sedimentary Rocks	1	0	0	0	0
INS2010_Ins-S10	S061WTS017	Ins-S10	Insel	2010	10.1016/j.geomorph.2010.05.014	27306.8	1537.14	108200	34100	3.96238	0.320145	184	10.4	15.1	323	102	106	0.569659	0.320808	0.338279	1	0	-20.0906	-63.9563	-20.013	-63.5398	848.59	5196.74	1482.64	1453.97	1452.63	1453.3	27.6829	21.5057	21.3689	23.5192	458.666	220.343	747.572	4464.01	0.720495	40.0475	Active	Mixed Sedimentary Rocks	2	0	0	0	0
INS2010_Ins-S12	S061WTS019	Ins-S12	Insel	2010	10.1016/j.geomorph.2010.05.014	23690	1356.3	133800	32500	5.64794	0.249556	194	11.1	15.9	241	58.6	62.2	0.804979	0.249795	0.270792	0	0	-19.8996	-63.9757	-20.0958	-63.8898	864.11	1035.89	1346.42	1347.13	1346.59	1346.86	23.5183	17.8702	18.6762	20.0216	394.007	211.033	755.499	4508.44	0.767224	41.5064	Active	Mixed Sedimentary Rocks	1	0	0	0	0
INS2010_Ins-S15	S061WTS021	Ins-S15	Insel	2010	10.1016/j.geomorph.2010.05.014	11664.2	813.78	46500	30800	3.98656	0.66603	331	23.1	30.3	597	396	399	0.554439	0.666978	0.674582	0	0	-19.5336	-63.6661	-19.1697	-63.6626	891.36	3125.21	1089.28	1084.31	1084.49	1084.4	21.137	16.0696	16.3629	17.8565	349.022	197.169	722.266	4173.6	0.800285	38.1617	Active	Mixed Sedimentary Rocks	1	0	0	0	0
JTZ2024_br	S336WTS001	br	Jautzy	2024	10.1016/j.epsl.2023.118490	97745	3030	755952	65187	7.73392	0.0916343	46.3	1.45	3.11	42.1	3.68	5.2	1.09976	0.0928518	0.140599	2	0	48.5062	7.3125	48.5477	7.61228	958.97	647.64	469.45	469.992	469.035	469.514	18.1936	15.7073	14.8874	16.2628	324.664	149.293	943.28	10987.6	0.050799	0	Post-Orogenic	Siliciclastic Sedimentary Rocks	7	142.673	22.0297	0	0
JTZ2024_cl	S336WTS002	cl	Jautzy	2024	10.1016/j.epsl.2023.118490	77293	4560	112993	16573	1.46188	0.158093	70.6	4.18	5.92	359	52.7	61.1	0.196657	0.158287	0.18973	1	1	48.0654	6.75104	48.0255	6.67912	932.01	76.7478	707.55	703.721	704.671	704.196	18.9498	19.1534	16.8375	18.3136	341.19	48.1985	1169.79	13836.1	0.0278135	0	Post-Orogenic	Acid Plutonic Rocks	3	23.7673	30.9681	0	0
JTZ2024_do	S336WTS003	do	Jautzy	2024	10.1016/j.epsl.2023.118490	60553	2438	212268	40299	3.50549	0.194072	88.6	3.58	6.35	183	34.8	38.2	0.484153	0.194409	0.220704	1	1	47.795	6.96543	47.7553	7.08749	934.55	126.145	677.23	677.107	677.705	677.406	27.6724	23.9046	22.4447	24.6739	485.639	139.367	1155.74	13618.6	0.0237486	0.30849	Post-Orogenic	Acid Volcanic Rocks	7	63.6132	50.4286	0	0
JTZ2024_fe-01	S336WTS004	fe-01	Jautzy	2024	10.1016/j.epsl.2023.118490	104953	4008	651107	160721	6.2038	0.249779	53.2	2.04	3.76	60.6	15.1	16	0.877888	0.252108	0.273322	0	0	48.0302	7.11906	48.0952	7.33561	927.98	238.46	726.9	729.251	730.432	729.841	29.5326	28.5138	27.3218	28.4561	550.562	120.553	1162.13	14000.9	0.02228	0	Post-Orogenic	Acid Plutonic Rocks	5	93.6775	39.2844	0	0
JTZ2024_fe-02	S336WTS005	fe-02	Jautzy	2024	10.1016/j.epsl.2023.118490	110147	4792	687461	60024	6.2413	0.0975511	56.6	2.48	4.17	64.1	5.65	7.93	0.882995	0.0984335	0.143989	1	0	47.9945	7.05734	48.0353	7.12625	912.23	91.3462	872.27	871.305	881.077	876.191	33.1952	32.7828	29.6198	31.8659	619.54	90.1615	1299.1	16117.4	0.0291394	0	Post-Orogenic	Siliciclastic Sedimentary Rocks	2	66.8724	73.2077	0	0
JTZ2024_gi	S336WTS006	gi	Jautzy	2024	10.1016/j.epsl.2023.118490	122354	3835	716624	52921	5.85697	0.080224	36.8	1.16	2.48	44.6	3.34	5.13	0.825112	0.0812516	0.133311	1	1	48.3404	7.28823	48.2952	7.36148	958.34	124.514	478.33	477.735	476.839	477.287	24.794	22.0951	21.6272	22.8388	459.904	121.109	936.718	10714.3	0.0320907	0	Post-Orogenic	Siliciclastic Sedimentary Rocks	4	13.607	10.9281	0	0
JTZ2024_la	S336WTS007	la	Jautzy	2024	10.1016/j.epsl.2023.118490	85325	3117	576870	51239	6.76086	0.0960413	64.7	2.37	4.51	67.8	6.07	8.45	0.954277	0.0967319	0.1428	0	0	47.9312	7.1459	47.9175	7.3088	929.81	116.16	700.15	702.928	695.231	699.079	26.6989	25.4717	24.3421	25.5042	520.64	197.523	1120.99	13259.6	0.074843	0.920832	Post-Orogenic	Siliciclastic Sedimentary Rocks	5	23.9238	20.5956	0	0
JTZ2024_li	S336WTS008	li	Jautzy	2024	10.1016/j.epsl.2023.118490	91106	3137	629249	51242	6.90678	0.0884139	53.4	1.85	3.67	54.6	4.5	6.54	0.978022	0.0894029	0.138097	0	0	48.2523	7.22724	48.2826	7.36148	948.47	128.019	567.57	565.825	567.153	566.489	30.0152	25.4922	24.1833	26.5636	507.529	111.738	1016	11810.9	0.0336633	0	Post-Orogenic	Siliciclastic Sedimentary Rocks	5	37.3962	29.2115	0	0
JTZ2024_me	S336WTS009	me	Jautzy	2024	10.1016/j.epsl.2023.118490	87239	4284	709168	54507	8.12902	0.0912084	53.9	2.66	4.16	46.6	3.63	5.45	1.15665	0.092214	0.140124	2	0	48.2972	6.9424	48.525	6.60479	953.59	1037.91	513.23	511.06	512.707	511.883	17.349	14.1202	12.499	14.6561	282.95	130.821	965.982	11168.5	0.0431299	0	Post-Orogenic	Siliciclastic Sedimentary Rocks	9	147.301	14.1921	0	0
JTZ2024_mod	S336WTS010	mod	Jautzy	2024	10.1016/j.epsl.2023.118490	73483	3713	525742	58092	7.15461	0.1215	52.3	2.66	4.09	51.8	5.78	7.33	1.00965	0.122628	0.161677	0	0	48.8912	7.40767	48.8545	7.51466	984.28	133.089	266.81	266.63	264.381	265.505	12.8965	6.8414	5.14561	8.2945	140.937	34.4755	802.782	9229.68	0.0980015	0	Post-Orogenic	Siliciclastic Sedimentary Rocks	3	0	0	0	0
JTZ2024_mog	S336WTS011	mog	Jautzy	2024	10.1016/j.epsl.2023.118490	119925	4013	745138	59431	6.21337	0.0864936	34.2	1.16	2.34	39	3.16	4.64	0.876923	0.0878385	0.137246	1	0	48.6294	7.39625	48.5874	7.48427	972.02	143.098	360.45	363.868	363.228	363.548	13.4338	11.3949	10.534	11.7876	238.85	124.621	850.143	9676.35	0.0938669	0	Post-Orogenic	Carbonate Sedimentary Rocks	3	16.8425	11.7699	0	0
JTZ2024_mos	S336WTS012	mos	Jautzy	2024	10.1016/j.epsl.2023.118490	98234	3439	388570	34506	3.95556	0.095454	54.6	1.92	3.77	98.7	8.82	12.3	0.553191	0.0960317	0.14247	1	1	48.0193	6.7706	48.1169	6.54238	933.88	1054.45	684.66	683.788	683.375	683.582	20.8301	19.6311	17.1023	19.1878	362.886	107.04	1159.46	13727	0.0186646	0	Post-Orogenic	Acid Plutonic Rocks	6	487.359	46.2192	0	0
JTZ2024_mot	S336WTS013	mot	Jautzy	2024	10.1016/j.epsl.2023.118490	71345	3633	356675	45888	4.9993	0.138366	83.2	4.25	6.5	119	15.3	18.5	0.69916	0.138347	0.173989	1	1	47.9851	6.83581	48.0222	6.68894	920.15	258.078	798.16	796.101	793.769	794.935	26.0618	24.8496	20.6436	23.8517	449.5	55.7734	1251.38	15161.6	0.0106526	0	Post-Orogenic	Acid Plutonic Rocks	3	176.215	68.2795	0	0
JTZ2024_og	S336WTS014	og	Jautzy	2024	10.1016/j.epsl.2023.118490	92749	12517	145356	59462	1.5672	0.430765	55.7	7.56	8.25	262	107	110	0.212595	0.43036	0.445208	1	0	47.8062	6.6978	47.7627	6.61079	939.06	123.688	641.85	641.103	643.967	642.535	23.655	20.4578	16.6704	20.2611	391.103	101.801	1185.05	13788.1	0.00802782	0	Post-Orogenic	Acid Plutonic Rocks	6	59.1073	47.7872	0	0
JTZ2024_pl	S336WTS015	pl	Jautzy	2024	10.1016/j.epsl.2023.118490	102278	3458	774792	60148	7.57535	0.0846741	45.2	1.54	3.09	41.9	3.3	4.93	1.07876	0.0858125	0.136079	0	0	48.4687	6.99382	48.4083	6.84633	955.87	126.604	501.47	497.492	500.306	498.899	23.9611	18.1432	13.9441	18.6828	324.745	91.4617	953.289	11125.8	0.036397	0	Post-Orogenic	Siliciclastic Sedimentary Rocks	5	57.294	45.2544	0	0
JTZ2024_sa	S336WTS016	sa	Jautzy	2024	10.1016/j.epsl.2023.118490	99346	3198	643457	57398	6.47693	0.0948331	44.5	1.44	3.01	48.7	4.4	6.11	0.913758	0.0959692	0.142534	0	0	48.6039	7.09018	48.6867	7.01904	962.29	190.703	444.54	444.951	446.675	445.813	17.6827	10.6043	8.09198	12.1264	219.024	110.265	909.147	10547	0.0296568	0	Post-Orogenic	Siliciclastic Sedimentary Rocks	4	20.9007	10.9598	0	0
JTZ2024_sav	S336WTS017	sav	Jautzy	2024	10.1016/j.epsl.2023.118490	82811	2655	570721	68482	6.89185	0.124201	60.8	1.96	4.1	62.5	7.57	9.31	0.9728	0.125337	0.163513	0	0	47.7404	6.81152	47.674	6.82987	942.64	78.6961	606.07	603.681	605.5	604.59	18.473	17.3092	16.5452	17.4425	350.691	193.234	1160.53	13462.8	0.0300355	0.142506	Post-Orogenic	Siliciclastic Sedimentary Rocks	7	25.8247	32.8158	0	0
JTZ2024_th	S336WTS018	th	Jautzy	2024	10.1016/j.epsl.2023.118490	68180	2719	363622	38415	5.33326	0.112922	81.7	3.27	5.84	109	11.6	14.9	0.749541	0.1137	0.154258	1	1	47.9029	7.01365	47.8042	7.1562	929.15	211.994	722.11	720.23	720.034	720.132	33.3615	29.7367	28.8647	30.6543	584.033	126.573	1177.68	13980.8	0.0388111	0.191485	Post-Orogenic	Siliciclastic Sedimentary Rocks	7	113.673	53.6209	0	0
JTZ2024_vo	S336WTS019	vo	Jautzy	2024	10.1016/j.epsl.2023.118490	114842	5681	475865	45176	4.14365	0.10705	45.6	2.27	3.53	78.7	7.53	10.2	0.579416	0.107855	0.150965	1	1	48.1326	6.82463	48.1513	6.62547	937.28	289.584	657.98	658.34	656.424	657.382	16.0251	14.5262	12.5603	14.3705	281.037	81.0733	1112.55	13127.2	0.0167928	0	Post-Orogenic	Acid Plutonic Rocks	3	59.3827	20.5062	0	0
JTZ2024_we	S336WTS020	we	Jautzy	2024	10.1016/j.epsl.2023.118490	137083	4603	944539	92969	6.89027	0.103998	40.4	1.37	2.77	41.3	4.13	5.48	0.978208	0.105593	0.149356	0	0	48.1444	7.16959	48.1324	7.3308	928.52	149.718	724.31	723.684	727.245	725.465	26.6464	24.3925	23.3241	24.7876	498.334	105.189	1166.53	13986.5	0.0258163	0	Post-Orogenic	Acid Plutonic Rocks	6	40.9791	27.3709	0	0
JTZ2024_zis	S336WTS021	zis	Jautzy	2024	10.1016/j.epsl.2023.118490	61688	2467	430294	44832	6.97533	0.111601	64.1	2.57	4.59	65.3	6.86	8.9	0.981623	0.112444	0.15396	0	0	48.816	7.28172	48.8027	7.37891	980.5	119.524	298.18	296.403	298.63	297.517	14.1883	7.39474	4.63476	8.73927	142.85	47.6203	810.028	9261.63	0.120527	0	Post-Orogenic	Siliciclastic Sedimentary Rocks	2	0	0	0	0
JTZ2024_zo	S336WTS022	zo	Jautzy	2024	10.1016/j.epsl.2023.118490	86376	3370	506940	36216	5.86899	0.0813999	47.4	1.86	3.38	57.5	4.15	6.49	0.824348	0.0821516	0.133508	1	1	48.7154	7.28855	48.7586	7.45013	974.13	398.055	343.33	342.476	340.458	341.467	16.45	9.16944	6.83438	10.818	193.131	89.9597	842.551	9707.16	0.0809315	0	Post-Orogenic	Siliciclastic Sedimentary Rocks	4	21.8458	5.48813	0	0
KIR2010_SV08-1	S404WTS001	SV08-1	Kirby	2010	Bibcode: 2010AGUFMEP44A..05K	593000	11100	4.01414e+06	120496	6.76921	0.0353758	34.1	0.644	2.13	34.3	1.05	3.18	0.994169	0.0359691	0.11179	0	0	36.7929	-118	36.797	-117.994	714.162	1.11036	2863.88	2894.6	2836.96	2865.78	44.8955	36.5079	35.7389	39.0475	923	72.7179	436.5	2347.5	NaN	82.151	Active	Acid Plutonic Rocks	1	0	0	0	0
KIR2010_SV08-12	S404WTS002	SV08-12	Kirby	2010	Bibcode: 2010AGUFMEP44A..05K	23193.6	625.556	160221	16052.5	6.90798	0.103757	390	10.5	25.3	397	39.8	52.5	0.982368	0.103804	0.147296	0	0	36.7425	-117.908	36.7466	-117.902	815.916	0.761885	1824.94	1814	1732.31	1773.15	59.3809	62.0513	80.1386	67.1903	1505.23	181.77	215.215	987.569	NaN	70.9305	Active	Acid Plutonic Rocks	1	0	0	0	0
KIR2010_SV08-13	S404WTS003	SV08-13	Kirby	2010	Bibcode: 2010AGUFMEP44A..05K	65960.6	1903	412191	22561.7	6.24904	0.061874	235	6.78	15.4	258	14.2	26.4	0.910853	0.0621422	0.121511	1	0	36.7243	-117.961	36.7398	-117.945	738.834	10.6419	2604.81	2597.34	2599.8	2598.57	52.7289	65.2178	54.4715	57.4727	1230.11	130.073	403.412	2170.24	0.456229	70.9305	Active	Acid Plutonic Rocks	3	0	0	0	0
KIR2010_SV08-3	S404WTS004	SV08-3	Kirby	2010	Bibcode: 2010AGUFMEP44A..05K	207635	4726.15	1.43446e+06	37701.9	6.90854	0.0347692	82.8	1.89	5.25	82.5	2.18	7.47	1.00364	0.0349181	0.110539	0	0	36.7978	-117.991	36.7931	-117.973	732.907	4.78187	2675.23	2661.65	2683.75	2672.7	47.8429	50.6603	53.6175	50.7069	1095.73	191.357	415.5	2229.33	NaN	72.1479	Active	Acid Plutonic Rocks	1	0	0	0	0
KIR2010_SV08-4	S404WTS005	SV08-4	Kirby	2010	Bibcode: 2010AGUFMEP44A..05K	371511	8413.04	2.49042e+06	64201.1	6.70348	0.0343131	51.8	1.18	3.29	52.9	1.38	4.8	0.979206	0.0346331	0.110757	0	0	36.8091	-118.006	36.8173	-118.005	719.634	0.680811	2779.97	2718.67	2760.76	2739.71	45.4576	50.0578	34.8608	43.4588	811.182	29.0386	427.229	2292.24	NaN	79.7744	Active	Acid Plutonic Rocks	1	0	0	0	0
KIR2010_SV08-7	S404WTS006	SV08-7	Kirby	2010	Bibcode: 2010AGUFMEP44A..05K	29500	1150	214797	22142.6	7.28125	0.110211	325	12.7	23	313	32.4	42.1	1.03834	0.110645	0.151986	0	0	36.812	-117.946	36.8145	-117.936	807.697	1.37786	1878.74	1901.67	1756.5	1829.08	53.9543	57.5231	84.0265	65.168	1469.55	87.4686	206	944	NaN	58.929	Active	Acid Plutonic Rocks	1	0	0	0	0
KOB2009_LL1	S048WTS001	LL1	Kober	2009	10.1002/esp.1748	975356	51094	3662734	292288	3.75528	0.0954584	25	1.32	1.99	42.7	3.46	5.08	0.58548	0.0967149	0.143143	1	1	-17.9941	-69.6171	-18.3367	-69.863	618.87	2548.64	3751.08	4061.45	4062.08	4061.76	26.5642	22.7184	25.7045	24.9957	506.634	304.798	241.014	1579.47	0.546031	102.045	Active	Pyroclastic	8	0	0	7.1	0.28
KOB2009_LL1c	S048WTS008	LL1c	Kober	2009	10.1002/esp.1748	1147799	96714	6905304	502370	6.01613	0.111322	21.4	1.83	2.23	23.5	1.75	2.71	0.910638	0.113394	0.155426	0	0	-17.9941	-69.6171	-18.3367	-69.863	618.87	2548.64	3751.08	4061.45	4062.08	4061.76	26.5642	22.7184	25.7045	24.9957	506.634	304.798	241.014	1579.47	0.546031	102.045	Active	Pyroclastic	8	0	0	7.1	0.28
KOB2009_LL3b	S048WTS007	LL3b	Kober	2009	10.1002/esp.1748	791963	41058	4493928	447566	5.67442	0.112279	25.1	1.32	2	29.4	2.98	3.94	0.853741	0.114191	0.155913	1	0	-18.0706	-69.6941	-18.3998	-70.3016	650.16	3340.39	870.95	3484.4	3484.91	3484.65	18.1213	23.4333	26.5935	22.716	517.953	287.942	191.378	1246.64	0.544779	136.1	Active	Pyroclastic	8	0	0	7.1	0.21
KOB2009_LL4	S048WTS004	LL4	Kober	2009	10.1002/esp.1748	2221694	279194	10440162	429298	4.69919	0.132224	12.5	1.61	1.78	17.3	0.734	1.7	0.722543	0.135608	0.173014	1	1	-17.815	-69.6692	-17.9947	-69.6297	603.15	881.703	4320.93	4320.49	4321.2	4320.84	15.2655	17.9207	21.3988	18.195	409.351	254.811	270.95	1791.93	0.554244	97.7791	Active	Siliciclastic Sedimentary Rocks	6	0	0	4.2	0.48
KOB2009_LL5	S048WTS005	LL5	Kober	2009	10.1002/esp.1748	2165125	135948	9873854	1023008	4.56041	0.121149	13	0.833	1.14	18.4	1.97	2.56	0.706522	0.124775	0.16446	1	1	-17.8648	-69.6015	-17.9956	-69.6297	601.24	1331.76	4347.85	4347.65	4347.69	4347.67	15.6665	17.5514	20.6881	17.9687	400.389	234.449	278.625	1854.21	0.552968	84.6169	Active	Siliciclastic Sedimentary Rocks	6	0	0	4.7	0.35
KOB2015_RG-01	S127WTS050	RG-01	Kober	2015	10.1016/j.tecto.2015.06.037	110870	4689.84	661671	60266.5	5.96799	0.100426	93	3.95	6.78	106	9.66	13.3	0.877358	0.100544	0.145114	1	0	-18.6701	-65.0981	-18.9103	-63.4007	737.53	59324.1	2508.41	2520.49	2520.14	2520.31	27.1853	27.8895	27.7931	27.6227	583.331	248.923	624.092	3707.71	0.57274	31.6024	Active	Mixed Sedimentary Rocks	5	0	0	0	0
KOB2015_RG-03	S127WTS042	RG-03	Kober	2015	10.1016/j.tecto.2015.06.037	6254.6	1098.75	67634.1	12942.9	10.8135	0.259772	610	107	113	402	77	84.4	1.51741	0.259725	0.279991	2	0	-18.6306	-63.6264	-18.8444	-63.5744	892.94	1206.47	1029.41	1041.12	1041.23	1041.18	24.1904	23.6783	24.677	24.1819	511.107	267.833	792.739	4563.8	0.674133	32.4697	Active	Mixed Sedimentary Rocks	1	0	0	0	0
KOB2015_RG-05	S127WTS044	RG-05	Kober	2015	10.1016/j.tecto.2015.06.037	13590.7	1375.11	129900	17710.7	9.55798	0.169784	354	35.9	41.6	263	35.9	42.5	1.34601	0.170051	0.199808	2	2	-18.726	-63.7982	-19.0154	-63.698	850.92	1011.36	1412.22	1425.22	1427.25	1426.23	29.5994	30.0373	28.7421	29.4596	619.87	210.911	728.911	4357.5	0.602441	42.219	Active	Mixed Sedimentary Rocks	1	0	0	0	0
KOB2015_RG-06	S127WTS045	RG-06	Kober	2015	10.1016/j.tecto.2015.06.037	5807.29	1422.73	55035.6	15990.7	9.47698	0.380054	644	158	162	481	140	146	1.33888	0.380669	0.394223	0	0	-19.5379	-63.4882	-19.3961	-63.6693	898.16	900.56	1027.27	1034.95	1035.83	1035.39	11.0386	9.95932	10.1827	10.3935	218.111	119.608	697.937	3955.26	0.908208	30.2107	Active	Mixed Sedimentary Rocks	1	0	0	0	0
KOB2015_RG-07	S127WTS046	RG-07	Kober	2015	10.1016/j.tecto.2015.06.037	20071.3	2319.1	143097	21048.4	7.12942	0.187046	204	23.6	26.5	203	29.9	34.7	1.00493	0.187291	0.214694	0	0	-19.54	-63.7545	-19.3986	-63.6759	883.15	1846.34	1135.17	1145.72	1144.93	1145.33	20.8752	17.9108	18.4332	19.0731	390.817	203.746	731.685	4279.42	0.762025	42.2185	Active	Mixed Sedimentary Rocks	1	0	0	0	0
KOB2015_RG-11	S127WTS026	RG-11	Kober	2015	10.1016/j.tecto.2015.06.037	120715	4537.19	1.09623e+06	87533.7	9.0811	0.0882536	65	2.45	4.57	50.1	4.05	5.95	1.29741	0.0891939	0.138013	2	2	-19.4178	-64.286	-19.6136	-64.0942	787.35	923.971	2128.98	2139.65	2139.91	2139.78	25.8307	26.0105	24.2711	25.3708	541.288	220.936	683.94	4199.84	0.678003	36.1454	Active	Mixed Sedimentary Rocks	1	0	0	0	0
KOB2015_RG-15	S127WTS051	RG-15	Kober	2015	10.1016/j.tecto.2015.06.037	177849	9383.57	888356	72584.7	4.99501	0.0972614	70.3	3.73	5.59	93.3	7.67	11.1	0.753483	0.0978434	0.143098	1	1	-18.3255	-65.537	-18.7218	-64.3159	710.78	42844.4	2883.07	2895.45	2895.1	2895.27	27.2473	28.1597	27.8446	27.7505	586.445	242.369	590.953	3511.37	0.550344	28.4281	Active	Mixed Sedimentary Rocks	5	0	0	0	0
KOB2015_RG-16	S127WTS030	RG-16	Kober	2015	10.1016/j.tecto.2015.06.037	317459	8806.8	2.31224e+06	176095	7.28359	0.081053	25.6	0.719	1.69	24	1.87	2.82	1.06667	0.0828241	0.134775	0	0	-18.5266	-64.2249	-18.5236	-64.281	788.04	428.989	2093.24	2108.14	2109.43	2108.79	30.9642	33.0242	31.5031	31.8305	681.432	158.896	578.181	3589.29	0.591337	38.8375	Active	Mixed Sedimentary Rocks	1	0	0	0	0
KOB2015_RG-17	S127WTS052	RG-17	Kober	2015	10.1016/j.tecto.2015.06.037	332177	10424.6	1.97285e+06	113349	5.93916	0.0654665	29.8	0.944	2.01	33.9	1.98	3.57	0.879056	0.0664445	0.125058	1	0	-18.0238	-65.0144	-18.5238	-64.2976	756.42	9805.13	2400.71	2413.54	2413.93	2413.74	25.5937	26.1864	26.0164	25.9322	547.283	205.496	594.014	3508.74	0.629036	29.5639	Active	Mixed Sedimentary Rocks	3	0	0	0	0
KOB2015_RG-22	S127WTS034	RG-22	Kober	2015	10.1016/j.tecto.2015.06.037	1.07809e+06	16171.2	6.21379e+06	473228	5.76368	0.0776208	12.1	0.185	0.753	13.9	1.1	1.67	0.870504	0.0806001	0.135304	1	0	-18.999	-64.9161	-18.8522	-64.9837	720.57	325.381	2876.45	2888.35	2885.98	2887.17	23.0191	23.3771	22.9172	23.1045	496.049	173.004	611.22	3680.8	0.461501	29.6267	Active	Mixed Sedimentary Rocks	2	0	0	0	0
KOB2015_RG-27	S127WTS054	RG-27	Kober	2015	10.1016/j.tecto.2015.06.037	151716	6042.37	511124	48974.7	3.36896	0.103765	97.4	3.89	6.96	185	17.8	23.9	0.526486	0.104176	0.147635	1	1	-18.2161	-66.0297	-18.6094	-65.1622	678.55	24557.2	3311.81	3324.27	3323.84	3324.06	27.2568	27.8773	27.4153	27.5164	579.219	252.584	604.245	3601.95	0.500453	26.4723	Active	Mixed Sedimentary Rocks	5	0	0	0	0
KOB2015_RG-33	S127WTS039	RG-33	Kober	2015	10.1016/j.tecto.2015.06.037	215478	7266.24	1.54547e+06	98182.7	7.17227	0.0719245	35.8	1.22	2.45	34.3	2.21	3.73	1.04373	0.0728886	0.128488	0	0	-18.2522	-64.8801	-18.171	-64.8668	793.73	440.332	2066.09	2076.91	2078.96	2077.94	21.695	19.601	20.7754	20.6905	438.128	144.254	510.056	2962.79	0.818588	29.2501	Active	Mixed Sedimentary Rocks	1	0	0	0	0
KOB2015_RG-39	S127WTS008	RG-39	Kober	2015	10.1016/j.tecto.2015.06.037	44304.2	2552.35	466912	78763	10.5388	0.178255	276	15.9	22.8	184	31.1	34.9	1.5	0.17857	0.206883	2	2	-18.2686	-65.9737	-18.3502	-65.6984	694.82	1677.99	3154.62	3168.82	3168.21	3168.52	34.7515	37.3659	36.811	36.3095	760.742	173.767	608.123	3526.9	0.491219	22.4441	Active	Mixed Sedimentary Rocks	2	0	0	0	0
KOB2015_RG-40	S127WTS057	RG-40	Kober	2015	10.1016/j.tecto.2015.06.037	211653	6822.98	1.34466e+06	84242.8	6.35314	0.0704571	70.4	2.28	4.75	74.6	4.71	8	0.9437	0.0709586	0.126699	0	0	-17.7548	-66.2085	-17.9895	-65.8309	682.32	9128.29	3296.33	3307.55	3306.91	3307.23	24.8065	25.3062	25.7128	25.2751	535.715	245.712	705.02	4231.07	0.504655	29.6869	Active	Mixed Sedimentary Rocks	4	0	0	0	0
KOB2015_RG-45	S127WTS012	RG-45	Kober	2015	10.1016/j.tecto.2015.06.037	31963.8	2658.44	218103	34219.3	6.82344	0.177576	523	43.5	53.3	519	81.5	92.9	1.00771	0.1777	0.205977	0	0	-17.3431	-66.4593	-17.4236	-66.3737	640.31	139.77	3825.72	3836.58	3844.35	3840.47	33.2035	35.2803	37.071	35.185	769.042	189.511	818.477	5406.02	0.39477	30.5666	Active	Mixed Sedimentary Rocks	3	0	0	0	0
KOB2015_RG-47	S127WTS014	RG-47	Kober	2015	10.1016/j.tecto.2015.06.037	150600	5386.69	833821	73589.1	5.53664	0.0952279	100	3.6	6.94	121	10.7	14.9	0.826446	0.0954768	0.14135	1	0	-17.5445	-66.5522	-17.5728	-66.3509	673.46	987.792	3424.2	3438.66	3435.55	3437.11	30.6469	31.7068	31.3845	31.2461	648.638	154.305	700.337	4340.55	0.443032	30.997	Active	Mixed Sedimentary Rocks	2	0	0	0	0
KOB2015_RG-57	S127WTS024	RG-57	Kober	2015	10.1016/j.tecto.2015.06.037	437095	10055	2.63155e+06	174180	6.02054	0.0700728	51.5	1.19	3.28	56.6	3.79	6.21	0.909894	0.0708358	0.126863	1	0	-18.8611	-66.2092	-18.6394	-66.2868	624.33	1153.14	4047.51	4054.54	4054.69	4054.62	18.2095	18.984	19.355	18.8495	400.059	138.481	366.915	2253.09	0.530242	22.1288	Active	Mixed Sedimentary Rocks	3	0	0	0	0
MAS2018_PAN10	S405WTS001	PAN10	Mason	2018	10.1016/j.epsl.2018.03.056	362733	8772	2225616	77950	6.13569	0.0425618	28.2	0.689	1.82	31.7	1.13	2.99	0.88959	0.0432162	0.114289	1	1	36.0303	-117.107	36.044	-117.207	808.032	35.1172	1864.85	1848.41	1885.73	1867.07	37.7844	39.8634	41.3872	39.6783	872.079	206.419	271.64	1190.06	0.544591	19.1312	Active	Siliciclastic Sedimentary Rocks	1	0	0	0	0
MAS2018_PAN12	S405WTS002	PAN12	Mason	2018	10.1016/j.epsl.2018.03.056	287452	16818	1637336	65025	5.69603	0.0707127	36.8	2.17	3.08	44.6	1.79	4.28	0.825112	0.0713298	0.127335	1	1	36.0084	-117.111	36.027	-117.204	802.802	19.4393	1853.33	1866.66	1921.28	1893.97	25.3454	27.42	23.4526	25.406	670.05	284.337	276.444	1172.41	NaN	19.9695	Active	Siliciclastic Sedimentary Rocks	2	0	0	0	0
MAT2003_GSAC-1	S015WTS035	GSAC-1	Matmon	2003	10.2475/ajs.303.9.817	327320	9946.2	2150000	770000	6.56849	0.359426	13.3	0.413	0.902	13.9	5.19	5.34	0.956835	0.37467	0.390113	0	0	35.5819	-83.8415	35.6107	-83.9357	927.88	157.476	760.8	757.15	763.117	760.133	21.3711	20.5408	23.5004	21.8041	451.02	190.677	1523.14	12054	0.207927	0	Post-Orogenic	Siliciclastic Sedimentary Rocks	3	0	0	0	0
MAT2003_GSBC-1	S015WTS027	GSBC-1	Matmon	2003	10.2475/ajs.303.9.817	202270	5186.4	1450000	90000	7.16865	0.0671567	33.4	0.863	2.17	32.3	2.04	3.49	1.03406	0.0682388	0.126079	0	0	35.7141	-83.1724	35.7493	-83.1151	867.12	74.7753	1018.3	1314.39	1321.67	1318.03	33.8336	34.4141	29.9637	32.7372	693.808	98.0624	1635.75	14144.7	0.0703745	0	Post-Orogenic	Metamorphic Rocks	2	0	0	0	0
MAT2003_GSBC-2	S015WTS028	GSBC-2	Matmon	2003	10.2475/ajs.303.9.817	213507	6915.2	1290000	80000	6.04196	0.0699639	32.5	1.06	2.21	37.4	2.36	4.03	0.868984	0.0710322	0.127416	1	0	35.7139	-83.1798	35.7357	-83.1303	862.99	65.6427	1366.1	1355.3	1368.79	1362.04	36.3686	33.7388	28.6083	32.9052	678.052	86.8378	1663.31	14472.9	0.0686574	0	Post-Orogenic	Metamorphic Rocks	2	0	0	0	0
MAT2003_GSCA-1	S015WTS039	GSCA-1	Matmon	2003	10.2475/ajs.303.9.817	342692	9946.2	2320000	110000	6.76993	0.0555918	18.2	0.536	1.21	18.5	0.904	1.87	0.983784	0.0570536	0.120985	0	0	35.6268	-83.1236	35.6685	-83.0707	877.52	149.608	1225.01	1223.49	1216.02	1219.76	29.0864	26.1982	26.4405	27.2417	553.492	103.722	1604.7	13555.7	0.11271	0	Post-Orogenic	Metamorphic Rocks	2	0	0	0	0
MAT2003_GSCO-1A	S015WTS015	GSCO-1A	Matmon	2003	10.2475/ajs.303.9.817	266739	8137.8	1540000	90000	5.77343	0.0659256	23.7	0.732	1.59	28.5	1.7	3.03	0.831579	0.0671712	0.125714	1	1	35.5995	-83.2785	35.5052	-83.3012	875.82	330.394	721.14	1228.58	1226.96	1227.77	22.8655	29.2406	26.7729	26.293	593.917	102.99	1661.89	14301.5	0.113267	0	Post-Orogenic	Metamorphic Rocks	2	0	0	0	0
MAT2003_GSCO-1z	S015WTS012	GSCO-1z	Matmon	2003	10.2475/ajs.303.9.817	238709	9042	1480000	80000	6.20002	0.0660049	26.5	1.02	1.88	29.7	1.64	3.08	0.892256	0.0673101	0.125648	1	0	35.5995	-83.2785	35.5052	-83.3012	875.82	330.394	721.14	1228.58	1226.96	1227.77	22.8655	29.2406	26.7729	26.293	593.917	102.99	1661.89	14301.5	0.113267	0	Post-Orogenic	Metamorphic Rocks	2	0	0	0	0
MAT2003_GSCO-2	S015WTS019	GSCO-2	Matmon	2003	10.2475/ajs.303.9.817	202270	6050.8	1320000	70000	6.52594	0.0608859	29.9	0.902	1.99	31.8	1.72	3.27	0.940252	0.061932	0.122489	0	0	35.5852	-83.3396	35.5164	-83.3055	882.86	134.869	1132.22	1170.46	1163.31	1166.88	33.2311	30.9631	29.1754	31.1232	624.063	93.8064	1640.78	13980.7	0.129238	0	Post-Orogenic	Metamorphic Rocks	2	0	0	0	0
MAT2003_GSCO-3	S015WTS020	GSCO-3	Matmon	2003	10.2475/ajs.303.9.817	269693	6915.2	1790000	90000	6.63718	0.05644	19.9	0.518	1.3	20.7	1.07	2.12	0.961353	0.0578749	0.121476	0	0	35.5276	-83.3362	35.5205	-83.308	898.81	12.2599	1031.81	1025.47	1027	1026.23	31.6711	31.5019	32.8483	32.0071	641.075	87.1563	1583.18	12959.1	0.210715	0	Post-Orogenic	Metamorphic Rocks	1	0	0	0	0
MAT2003_GSCO-4	S015WTS021	GSCO-4	Matmon	2003	10.2475/ajs.303.9.817	172880	5186.4	1060000	90000	6.13142	0.0900498	36.3	1.1	2.42	41.3	3.56	5.06	0.878935	0.0913699	0.139482	1	0	35.6138	-83.3225	35.5584	-83.3119	877.38	51.403	1215.18	1218.28	1218.14	1218.21	36.4945	32.6553	29.3837	32.8445	626.74	76.1342	1655.81	14246.6	0.10629	0	Post-Orogenic	Metamorphic Rocks	2	0	0	0	0
MAT2003_GSCO-5	S015WTS022	GSCO-5	Matmon	2003	10.2475/ajs.303.9.817	274015	6915.2	1850000	90000	6.75146	0.0548049	21.9	0.559	1.42	22.4	1.12	2.27	0.977679	0.0561385	0.120308	0	0	35.5589	-83.3561	35.5672	-83.3361	883.12	9.32151	1189.29	1189.95	1168.44	1179.2	33.0785	31.9721	29.7814	31.6106	643.453	64.8635	1672	14114.7	0.14482	0	Post-Orogenic	Metamorphic Rocks	1	0	0	0	0
MAT2003_GSCO-6	S015WTS023	GSCO-6	Matmon	2003	10.2475/ajs.303.9.817	312048	10372.8	2110000	110000	6.76177	0.0618287	20.1	0.68	1.38	20.5	1.1	2.13	0.980488	0.0634332	0.124537	0	0	35.5993	-83.3532	35.5872	-83.3595	876.17	1.55784	1207.23	1239	1195.34	1217.17	30.9539	28.2168	31.8343	30.335	629.478	31.6968	1702.33	14645	0.145175	0	Post-Orogenic	Metamorphic Rocks	1	0	0	0	0
MAT2003_GSCO-7	S015WTS024	GSCO-7	Matmon	2003	10.2475/ajs.303.9.817	240303	6050.8	1720000	90000	7.15762	0.0580689	30.7	0.782	1.99	29.7	1.59	3.05	1.03367	0.0592864	0.12144	0	0	35.6071	-83.4243	35.6015	-83.4128	853.62	2.36858	1445.35	1454.64	1458	1456.32	33.6431	23.0675	21.4531	26.0546	541.974	59.5296	1779.5	16048	NaN	0	Post-Orogenic	Metamorphic Rocks	2	0	0	0	0
MAT2003_GSCS-1	S015WTS029	GSCS-1	Matmon	2003	10.2475/ajs.303.9.817	165100	4322	1130000	60000	6.84432	0.0591998	36.2	0.955	2.35	36.8	1.99	3.78	0.983696	0.060168	0.121512	0	0	35.7401	-83.1983	35.7538	-83.2055	885.05	7.09758	1180.03	1182	1150.17	1166.08	38.7546	38.4166	39.5362	38.9025	791.722	65.6285	1549.67	13016.2	0.152122	0	Post-Orogenic	Siliciclastic Sedimentary Rocks	2	0	0	0	0
MAT2003_GSDC-1	S015WTS034	GSDC-1	Matmon	2003	10.2475/ajs.303.9.817	273150	6915.2	1760000	90000	6.44334	0.0570601	21.3	0.546	1.38	22.8	1.2	2.35	0.934211	0.0585421	0.121742	1	0	35.5366	-83.4236	35.4642	-83.434	887.43	104.893	1118.64	1114.75	1115.58	1115.17	32.1318	27.7496	27.8447	29.242	592.493	111.469	1659.44	14036.7	0.152091	0	Post-Orogenic	Metamorphic Rocks	3	0	0	0	0
MAT2003_GSLP-1	S015WTS030	GSLP-1	Matmon	2003	10.2475/ajs.303.9.817	194490	6050.8	1280000	70000	6.58132	0.0629176	31.5	0.988	2.12	33.2	1.85	3.45	0.948795	0.0639438	0.123806	0	0	35.6861	-83.3589	35.7376	-83.415	881.3	117.361	1166.65	1162.94	1167.95	1165.45	34.9333	32.1187	33.995	33.6823	707.017	163.618	1607.12	13554.3	0.126212	0	Post-Orogenic	Siliciclastic Sedimentary Rocks	2	0	0	0	0
MAT2003_GSLR-1	S015WTS031	GSLR-1	Matmon	2003	10.2475/ajs.303.9.817	228202	6050.8	1610000	90000	7.05517	0.0618703	24.5	0.658	1.61	24.1	1.38	2.53	1.0166	0.0632469	0.123851	0	0	35.6308	-83.5784	35.6612	-83.707	893.61	155.748	760.84	1053.97	1055.2	1054.59	25.6081	26.7831	26.4918	26.2943	563.674	121.614	1609.62	13282.6	0.133696	0	Post-Orogenic	Siliciclastic Sedimentary Rocks	3	0	0	0	0
MAT2003_GSLR-2	S015WTS044	GSLR-2	Matmon	2003	10.2475/ajs.303.9.817	231475	7233.6	1400000	90000	6.04816	0.0714788	31.8	1	2.15	36.5	2.38	3.98	0.871233	0.0723923	0.128301	1	0	35.598	-83.4913	35.5993	-83.5141	853.97	7.90159	1421.51	1430	1444	1437	33.8757	35.9436	36.5796	35.4663	722.992	69.9555	1802.2	15849.1	0.0905369	0	Post-Orogenic	Siliciclastic Sedimentary Rocks	1	0	0	0	0
MAT2003_GSMP-1	S015WTS032	GSMP-1	Matmon	2003	10.2475/ajs.303.9.817	230795	6050.8	1370000	70000	5.93601	0.0574285	21.7	0.577	1.42	25.5	1.33	2.61	0.85098	0.0585437	0.121483	1	1	35.6118	-83.6829	35.6593	-83.7092	909.24	118.318	922.58	923.264	903.728	913.496	28.2539	25.8748	26.6262	26.9183	565.956	136.613	1570.89	12694	0.181512	0	Post-Orogenic	Siliciclastic Sedimentary Rocks	3	0	0	0	0
MAT2003_GSNC-1	S015WTS038	GSNC-1	Matmon	2003	10.2475/ajs.303.9.817	328225	10850.4	2110000	100000	6.42852	0.0577837	18.3	0.615	1.26	19.6	0.958	1.98	0.933673	0.0593162	0.122253	1	0	35.5128	-83.4919	35.4581	-83.5276	882.39	46.4976	1158.94	1167.37	1132.76	1150.06	33.0619	30.1922	27.4486	30.2342	632.242	93.0283	1708.23	14553.2	0.126598	0	Post-Orogenic	Metamorphic Rocks	2	0	0	0	0
MAT2003_GSRF-1	S015WTS001	GSRF-1	Matmon	2003	10.2475/ajs.303.9.817	375150	9508.4	2460000	120000	6.55738	0.0549721	20.6	0.53	1.34	21.6	1.08	2.2	0.953704	0.0562311	0.120852	0	0	35.6505	-83.262	35.6102	-83.2549	846.72	36.9712	1516.92	1519.37	1507.78	1513.58	29.2437	21.1646	16.425	22.2778	505.736	88.537	1788.35	16267.7	0.0467277	0	Post-Orogenic	Metamorphic Rocks	2	0	0	0	0
MAT2003_GSRF-10	S015WTS009	GSRF-10	Matmon	2003	10.2475/ajs.303.9.817	280930	7779.6	1900000	110000	6.76325	0.0641768	24.4	0.683	1.61	24.9	1.48	2.64	0.97992	0.0656992	0.12488	0	0	35.6398	-83.2154	35.5844	-83.2379	864.52	51.8409	1133.35	1339.08	1356.44	1347.76	40.7507	36.1227	29.3816	35.4183	632.312	78.1227	1695.27	14957.2	0.0899222	0	Post-Orogenic	Metamorphic Rocks	2	0	0	0	0
MAT2003_GSRF-11	S015WTS010	GSRF-11	Matmon	2003	10.2475/ajs.303.9.817	390709	9508.4	2680000	130000	6.85933	0.05427	19	0.47	1.23	19	0.952	1.94	1	0.0558789	0.120898	0	0	35.638	-83.2675	35.5803	-83.2637	852.41	55.8928	1356.33	1464.95	1453.75	1459.35	33.3725	22.7418	18.468	24.8608	520.194	105.13	1771.59	15921.3	0.0670735	0	Post-Orogenic	Metamorphic Rocks	2	0	0	0	0
MAT2003_GSRF-12	S015WTS011	GSRF-12	Matmon	2003	10.2475/ajs.303.9.817	267964	7779.6	1530000	80000	5.70972	0.0598069	24.6	0.722	1.64	29.9	1.59	3.07	0.822742	0.0607389	0.12242	1	1	35.6008	-83.2351	35.517	-83.2949	869.96	191.596	997.12	1281.98	1280.41	1281.2	32.1114	28.1457	25.3435	28.5335	575.486	103.471	1683.17	14613.4	0.101552	0	Post-Orogenic	Metamorphic Rocks	2	0	0	0	0
MAT2003_GSRF-2	S015WTS002	GSRF-2	Matmon	2003	10.2475/ajs.303.9.817	289574	7779.6	1870000	90000	6.45776	0.055119	22.9	0.622	1.5	24.5	1.21	2.47	0.934694	0.056364	0.120227	1	0	35.6311	-83.1847	35.6287	-83.1934	869.07	1.63511	1277.21	1276.8	1318.5	1297.65	29.6351	27.5126	19.6476	25.5984	546.407	52.1566	1687	14588.7	NaN	0	Post-Orogenic	Siliciclastic Sedimentary Rocks	1	0	0	0	0
MAT2003_GSRF-3	S015WTS003	GSRF-3	Matmon	2003	10.2475/ajs.303.9.817	398488	10372.8	2520000	130000	6.3239	0.0577826	17	0.451	1.12	18.5	0.985	1.92	0.918919	0.0594866	0.122929	1	0	35.6371	-83.1937	35.629	-83.194	865.22	0.804879	1339.99	1363	1336.4	1349.7	32.5006	29.2793	29.7796	30.5198	564	24.748	1697.01	14764.6	NaN	0	Post-Orogenic	Siliciclastic Sedimentary Rocks	2	0	0	0	0
MAT2003_GSRF-5	S015WTS004	GSRF-5	Matmon	2003	10.2475/ajs.303.9.817	278337	7779.6	2040000	100000	7.32925	0.0564282	23.4	0.662	1.55	22	1.11	2.23	1.06364	0.0578448	0.121088	2	0	35.6209	-83.1894	35.6231	-83.1988	871.6	0.70289	1283.16	1297.67	1278.54	1288.1	30.5198	40.2393	44.6291	38.4627	735.727	26.6222	1643	14114	0.114786	0	Post-Orogenic	Siliciclastic Sedimentary Rocks	2	0	0	0	0
MAT2003_GSRF-6	S015WTS005	GSRF-6	Matmon	2003	10.2475/ajs.303.9.817	294760	7779.6	1810000	90000	6.14058	0.0562942	25	0.667	1.63	28.1	1.43	2.85	0.88968	0.0574594	0.120573	1	0	35.6576	-83.2184	35.6223	-83.2117	854.18	27.2825	1436.09	1435.57	1449.76	1442.67	35.6944	33.3373	26.3527	31.7948	593.459	49.398	1740.31	15642.3	0.0740142	0	Post-Orogenic	Metamorphic Rocks	2	0	0	0	0
MAT2003_GSRF-7	S015WTS006	GSRF-7	Matmon	2003	10.2475/ajs.303.9.817	325014	9508.4	2150000	120000	6.61509	0.0630164	20.2	0.601	1.35	21.1	1.21	2.22	0.957346	0.0646047	0.124645	0	0	35.6224	-83.1911	35.6181	-83.2081	869.75	7.73224	1279.32	1291.47	1306.62	1299.05	31.4863	34.0928	29.4922	31.6904	656.189	94.7425	1673.91	14469.5	0.114786	0	Post-Orogenic	Siliciclastic Sedimentary Rocks	2	0	0	0	0
MAT2003_GSRF-8	S015WTS007	GSRF-8	Matmon	2003	10.2475/ajs.303.9.817	256727	7779.6	1330000	100000	5.1806	0.0810648	27.3	0.837	1.83	36.6	2.8	4.25	0.745902	0.0824176	0.13408	1	1	35.6038	-83.1994	35.613	-83.2133	861.09	3.62437	1371.91	1380	1326.67	1353.33	37.7491	43.6505	40.7835	40.7277	792.35	38.063	1685.33	14615.7	0.104886	0	Post-Orogenic	Metamorphic Rocks	2	0	0	0	0
MAT2003_GSRF-9	S015WTS008	GSRF-9	Matmon	2003	10.2475/ajs.303.9.817	236846	6915.2	1690000	90000	7.13545	0.0607331	27.4	0.809	1.82	26.6	1.45	2.75	1.03008	0.0619938	0.122883	0	0	35.6209	-83.2327	35.6077	-83.2243	872.31	2.70005	1261.58	1255.6	1290	1272.8	35.1594	34.0128	41.3006	36.8243	634.067	36.6287	1670	14616.5	0.104886	0	Post-Orogenic	Metamorphic Rocks	1	0	0	0	0
MAT2003_GSWP-1	S015WTS033	GSWP-1	Matmon	2003	10.2475/ajs.303.9.817	209185	5186.4	1250000	70000	5.97558	0.0612431	30.7	0.768	1.98	35.7	2.03	3.72	0.859944	0.0621224	0.122546	1	1	35.6395	-83.4765	35.6876	-83.5355	874.18	63.6498	1225.32	1222.98	1220.94	1221.96	35.9075	33.0977	32.1949	33.7333	708.868	165.703	1677.12	14338.9	0.105092	0	Post-Orogenic	Siliciclastic Sedimentary Rocks	1	0	0	0	0
MAT2014_As-1	S167WTS001	As-1	Matsushi	2014	10.5110/jjseg.54.272	26319	1271	192922	13594	7.33014	0.085424	197	9.55	15.1	191	13.5	21.3	1.03141	0.0857076	0.13532	0	0	36.3967	137.812	36.4026	137.813	891.32	0.269601	991.72	991	973.777	982.388	34.7979	44.0055	48.1121	42.3052	924.25	7.66078	1395.76	14019.9	NaN	208.87	Active	Acid Plutonic Rocks	1	0	0	0	0
MAT2014_As-10	S167WTS010	As-10	Matsushi	2014	10.5110/jjseg.54.272	16619	1153	106189	10364	6.38961	0.119746	391	27.1	35.6	431	42.1	56.1	0.907193	0.119771	0.158846	0	0	36.4062	137.785	36.405	137.82	852.22	11.7094	1403.24	1425.67	1429.89	1427.78	48.7542	49.6531	56.3564	51.5879	1120.8	141.667	1667.26	19453.5	0.0909936	174.723	Active	Acid Plutonic Rocks	2	0	0	0	0
MAT2014_As-2	S167WTS002	As-2	Matsushi	2014	10.5110/jjseg.54.272	25277	1189	212072	15552	8.38992	0.0871233	210	9.89	15.9	178	13.1	20.2	1.17978	0.0873743	0.136422	2	2	36.3977	137.806	36.4033	137.809	887.69	0.739683	1061.23	1076	1076.86	1076.43	37.0781	46.8046	56.5095	46.7974	1030.62	99.965	1448.86	14910.8	NaN	212.26	Active	Acid Plutonic Rocks	2	0	0	0	0
MAT2014_As-3	S167WTS003	As-3	Matsushi	2014	10.5110/jjseg.54.272	25977	2580	226553	18574	8.72129	0.128786	339	33.7	39.2	274	22.5	32.6	1.23723	0.12894	0.165913	2	0	36.3969	137.77	36.4041	137.772	805.41	0.898687	1855.66	1894.75	1815.36	1855.05	59.6586	56.6482	39.8655	52.0574	1143.6	48.9746	1952.5	25777.5	NaN	190.508	Active	Acid Plutonic Rocks	1	0	0	0	0
MAT2014_As-4	S167WTS004	As-4	Matsushi	2014	10.5110/jjseg.54.272	6675	592	47149	4427	7.06352	0.129158	1240	110	132	1230	116	157	1.00813	0.129474	0.166206	0	0	36.4027	137.762	36.405	137.773	808.64	1.94237	1845.85	1893.88	1758	1825.94	57.6549	47.5953	39.6635	48.3046	1014.65	62.3836	1865	23887.5	0.0909936	180.209	Active	Acid Plutonic Rocks	1	0	0	0	0
MAT2014_As-5	S167WTS005	As-5	Matsushi	2014	10.5110/jjseg.54.272	12962	935	55721	6057	4.2988	0.130459	642	46.3	59.9	1040	113	144	0.617308	0.13041	0.166964	1	1	36.4027	137.769	36.4074	137.775	812.08	0.380158	1603.68	1601	1666.79	1633.9	52.3032	58.3995	58.361	56.3546	1058.5	25.5131	1793.1	21971.6	0.0909936	178.716	Active	Acid Plutonic Rocks	1	0	0	0	0
MAT2014_As-6	S167WTS006	As-6	Matsushi	2014	10.5110/jjseg.54.272	16658	924	108650	9693	6.52239	0.105051	443	24.6	35.9	477	42.6	59.2	0.928721	0.105165	0.148224	0	0	36.4122	137.771	36.4092	137.776	831.42	0.269556	1592.94	1612.39	1661.17	1636.78	59.7142	53.5333	58.2127	57.1534	1064.5	20.4022	1789.79	21752	NaN	178.716	Active	Acid Plutonic Rocks	1	0	0	0	0
MAT2014_As-7	S167WTS007	As-7	Matsushi	2014	10.5110/jjseg.54.272	6251	712	46193	4808	7.3897	0.154296	1050	119	134	1010	105	136	1.0396	0.153793	0.185521	0	0	36.4014	137.783	36.406	137.787	847.48	0.573755	1493.97	1436.67	1454.98	1445.82	54.4745	73.3379	76.5612	68.1245	1276.44	25.3294	1676.87	19237.5	0.0909936	185.685	Active	Acid Plutonic Rocks	1	0	0	0	0
MAT2014_As-8	S167WTS008	As-8	Matsushi	2014	10.5110/jjseg.54.272	10369	1460	72161	7396	6.9593	0.174157	600	84.5	91.6	611	62.7	81.8	0.981997	0.174254	0.203053	0	0	36.4118	137.788	36.4075	137.792	858.09	0.559842	1366.09	1327.5	1344.5	1336	53.163	40.7237	48.4279	47.4382	1058.9	105.164	1637.31	18290.7	0.0909936	178.716	Active	Acid Plutonic Rocks	1	0	0	0	0
MAT2014_As-9	S167WTS009	As-9	Matsushi	2014	10.5110/jjseg.54.272	33881	1889	293796	22756	8.67141	0.0954348	156	8.72	12.7	129	10	15	1.2093	0.0955708	0.141945	2	2	36.4114	137.806	36.4066	137.808	890.47	0.22809	1029.04	1023.99	1013.24	1018.61	34.3973	25.2965	49.5244	36.4061	1044	46.1357	1448.44	14921.9	0.0909936	117.523	Active	Acid Plutonic Rocks	2	0	0	0	0
MAT2014_Tk-1	S167WTS011	Tk-1	Matsushi	2014	10.5110/jjseg.54.272	19834	1528	169272	17337	8.53444	0.128161	298	23	28.9	249	25.6	33.4	1.19679	0.128558	0.165523	2	0	36.5266	137.772	36.5192	137.782	868.41	2.26375	1257.84	1237.75	1229.82	1233.78	49.1661	36.2599	42.8946	42.7736	835.417	100.001	1594.25	17656.2	NaN	186.607	Active	Acid Plutonic Rocks	1	0	0	0	0
MAT2014_Tk-2	S167WTS012	Tk-2	Matsushi	2014	10.5110/jjseg.54.272	8107	955	46152	5020	5.69286	0.160337	832	98.1	110	1030	112	143	0.807767	0.160394	0.191716	1	0	36.5015	137.733	36.4934	137.74	844.01	1.78121	1472.73	1477.38	1428.33	1452.85	58.9892	55.7042	42.5946	52.4293	948.111	67.6003	1703	20629	NaN	183.533	Active	Acid Plutonic Rocks	1	0	0	0	0
MAT2014_Tk-3	S167WTS013	Tk-3	Matsushi	2014	10.5110/jjseg.54.272	25858	1358	165857	12840	6.41415	0.0935486	358	18.8	28.3	389	30.2	45.1	0.920308	0.0937278	0.140323	0	0	36.4958	137.696	36.4868	137.704	798.01	1.17377	1790.64	1672.75	1770.5	1721.62	64.3973	70.342	55.7608	63.5	1277.78	54.2817	1860.8	24698.5	NaN	262.495	Active	Acid Plutonic Rocks	1	0	0	0	0
MAT2018_UGAB1	S218WTS001	UGAB1	Matmon	2018	10.1016/j.geomorph.2018.04.008	1026000	39000	5768000	286000	5.62183	0.0624776	4.79	0.194	0.357	5.66	0.31	0.621	0.84629	0.0681184	0.132637	1	1	-20.3342	16.3881	-20.4056	15.5193	864.31	13949.5	1372.22	1361.88	1361.8	1361.84	2.38348	2.40576	2.64938	2.47954	59.0541	63.3485	389.543	1588.39	0.946779	0	Post-Orogenic	Metamorphic Rocks	7	0	0	0	0
MAT2018_UGAB3	S218WTS003	UGAB3	Matmon	2018	10.1016/j.geomorph.2018.04.008	799000	29000	5042000	250000	6.31039	0.0614482	5.7	0.218	0.416	5.97	0.326	0.652	0.954774	0.0666677	0.131354	0	0	-20.522	15.9222	-21.0122	14.6843	877.28	24350.7	1230.97	1221.01	1220.92	1220.97	3.52434	3.48701	3.79722	3.60286	84.2045	107.109	317.289	1291.97	0.946717	0	Post-Orogenic	Metamorphic Rocks	10	0	0	0	0
MAT2018_UGAB5	S218WTS005	UGAB5	Matmon	2018	10.1016/j.geomorph.2018.04.008	796000	30000	4899000	260000	6.15452	0.0650927	5.35	0.213	0.396	5.75	0.337	0.642	0.930435	0.0708524	0.133959	0	0	-20.5238	15.6455	-21.1863	13.6293	886.6	29360.8	1121.1	1111.69	1111.72	1111.7	4.4019	4.15268	4.47861	4.3444	99.174	136.718	278.548	1137.42	0.93559	0	Post-Orogenic	Metamorphic Rocks	10	0	0	0	0
MCP2013_QVP-034	S402WTS001	QVP-034	McPhillips	2013	10.1002/2013JF002837	127406	3112.89	934376	26098.5	7.33382	0.0371096	67.9	1.67	4.36	63.8	1.8	5.82	1.06426	0.0374286	0.111556	2	0	-13.5137	-75.6625	-13.6157	-75.7208	763.51	299.603	2310.75	2323.67	2319.86	2321.76	0	38.5935	39.9109	26.1681	819.611	163.759	215.43	1378	0.469428	54.9439	Active	Acid Plutonic Rocks	6	0	0	0	0
MND2023_JB16	S357WTS012	JB16	Mandal	2023	10.1029/2023jf007164	21937	2178	132440	27800	6.03729	0.232203	167	16.6	19.3	197	41.5	44.9	0.847716	0.232934	0.255545	0	0	30.2644	77.9423	30.2901	77.9445	930.19	4.28615	714.98	709.647	722.8	716.224	11.4753	6.42036	6.84024	8.24529	164.809	25.2338	2051	12102.3	NaN	222.673	Active	Siliciclastic Sedimentary Rocks	2	0	0	0	0
MND2023_JB18	S357WTS013	JB18	Mandal	2023	10.1029/2023jf007164	6916	1538	36390	19460	5.26171	0.579159	516	115	119	706	378	383	0.730878	0.579944	0.589478	0	0	30.2281	77.9334	30.2112	77.9185	933.31	11.9515	687.26	683.735	693.833	688.784	20.3605	9.41997	9.09719	12.9592	236.115	34.5273	1980.83	11560.2	0.451995	222.673	Active	Siliciclastic Sedimentary Rocks	1	0	0	0	0
MND2023_RK12	S357WTS015	RK12	Mandal	2023	10.1029/2023jf007164	2091	253	15560	1990	7.44142	0.176057	1710	207	230	1660	213	257	1.03012	0.176403	0.205085	0	0	30.2027	77.9071	30.2024	77.9123	927.79	0.378471	739.99	750	664.272	707.136	33.1759	11.86	11.8469	18.9609	337	11.5181	2017.48	11691.5	NaN	218.48	Active	Siliciclastic Sedimentary Rocks	1	0	0	0	0
MND2023_RK13	S357WTS016	RK13	Mandal	2023	10.1029/2023jf007164	3415	324	26580	2780	7.78331	0.141211	1060	101	118	985	103	133	1.07614	0.141469	0.174998	0	0	30.2095	77.9087	30.2038	77.9139	929.18	1.148	725.31	710.4	679.021	694.71	28.4499	18.5908	11.2692	19.4366	309.105	12.354	1951	11258	NaN	222.673	Active	Siliciclastic Sedimentary Rocks	1	0	0	0	0
MND2023_RK16	S357WTS018	RK16	Mandal	2023	10.1029/2023jf007164	5841	488	20300	2590	3.47543	0.152507	629	52.6	64.4	1280	163	196	0.491406	0.152347	0.184201	1	1	30.2394	77.9364	30.2354	77.9351	928.59	0.439585	731.89	738	729.413	733.707	17.911	10.2998	10.9557	13.0555	214	10.198	2075.45	12216	NaN	222.673	Active	Siliciclastic Sedimentary Rocks	1	0	0	0	0
MND2023_RK19	S357WTS021	RK19	Mandal	2023	10.1029/2023jf007164	3858	400	14600	2130	3.78434	0.17898	906	94	108	1700	248	288	0.532941	0.179015	0.207148	1	1	30.2267	77.9257	30.2221	77.9281	935.89	0.690401	666.35	652.75	650.099	651.424	18.7432	7.05252	7.67519	11.157	209	8.86259	1921.29	11169.5	NaN	222.673	Active	Siliciclastic Sedimentary Rocks	1	0	0	0	0
MND2023_RK22	S357WTS023	RK22	Mandal	2023	10.1029/2023jf007164	4625	396	31760	2830	6.86703	0.123576	690	59.1	71.8	726	64.7	90	0.950413	0.123606	0.161851	0	0	30.3404	77.6423	30.3354	77.6473	953.9	0.750006	503.56	508	474.881	491.44	21.4485	10.2055	10.7581	14.1374	242.455	26.1094	1753.44	10047.4	0.429438	79.5913	Active	Siliciclastic Sedimentary Rocks	1	0	0	0	0
MND2023_RK27	S357WTS026	RK27	Mandal	2023	10.1029/2023jf007164	1915	273	11180	1550	5.83812	0.198857	1690	241	261	2080	288	339	0.8125	0.198765	0.22453	0	0	30.3339	77.6671	30.3367	77.6648	946.24	0.511679	573.36	562.667	542.051	552.359	27.1549	14.1218	16.9486	19.4084	309.125	6.153	1782.8	10210.1	NaN	79.5913	Active	Siliciclastic Sedimentary Rocks	1	0	0	0	0
MND2023_RK33	S357WTS030	RK33	Mandal	2023	10.1029/2023jf007164	6108	557	20180	2210	3.30386	0.142511	592	54	64.3	1260	139	176	0.469841	0.143144	0.176942	1	1	30.3686	77.6911	30.3651	77.6881	932.05	0.346206	695.27	699.532	679.234	689.383	22.037	17.5623	10.6785	16.7593	285.5	5.5	1941.89	11342.2	NaN	79.5913	Active	Siliciclastic Sedimentary Rocks	1	0	0	0	0
MND2023_RK39	S357WTS032	RK39	Mandal	2023	10.1029/2023jf007164	5562	448	15810	2340	2.8425	0.168505	632	51	63.2	1570	232	269	0.402548	0.168369	0.198385	1	1	30.3478	77.7018	30.3433	77.6975	936.73	0.396557	652.11	641.8	672.417	657.108	20.0054	19.7743	7.98893	15.9229	250	12.7017	1896.11	11029.7	NaN	107.532	Active	Siliciclastic Sedimentary Rocks	1	0	0	0	0
MOO2018_Cooksie	S227WTS002	Cooksie	Moon	2018	10.1016/j.epsl.2018.09.006	7600	300	40000	19000	5.26316	0.476637	483	19.1	34.3	679	323	328	0.71134	0.47734	0.488255	0	0	40.2354	-124.28	40.2274	-124.301	969.88	16.6927	387.17	376.545	383.688	380.116	30.9278	34.0385	24.7804	29.9156	610.542	60.557	1986.08	16643.4	0.575974	185.685	Active	Siliciclastic Sedimentary Rocks	1	0	0	0	0
MOO2018_Fourmile	S227WTS001	Fourmile	Moon	2018	10.1016/j.epsl.2018.09.007	12500	200	60000	16000	4.8	0.267146	303	4.86	18.6	458	122	128	0.661572	0.266858	0.286138	1	0	40.2621	-124.312	40.2573	-124.357	964.14	13.5868	435.24	417.056	429.5	423.278	34.8625	24.6441	18.1032	25.8699	557.186	43.2441	1992.71	17656.6	0.59862	277.131	Active	Siliciclastic Sedimentary Rocks	1	0	0	0	0
MOO2018_Hardy	S227WTS012	Hardy	Moon	2018	10.1016/j.epsl.2018.09.008	23700	600	170000	17000	7.173	0.103155	145	3.68	9.34	145	14.5	19.2	1	0.10317	0.14725	0	0	39.7272	-123.774	39.7127	-123.803	980.7	12.1134	298.11	286.255	271.077	278.666	32.5689	18.1124	16.3976	22.3596	408.571	65.1598	1609.52	12581.3	0.574498	340.669	Active	Siliciclastic Sedimentary Rocks	1	0	0	0	0
MOO2018_Horse Mtn	S227WTS010	Horse Mtn	Moon	2018	10.1016/j.epsl.2018.09.009	53700	2300	80000	40000	1.48976	0.501831	68.8	2.96	5.04	328	164	166	0.209756	0.501848	0.511372	1	0	40.0779	-124.068	40.0694	-124.08	970.82	6.81256	382.23	366.259	360.75	363.505	36.0644	31.0446	35.7375	34.2822	681.537	73.9678	1935.91	15533.1	0.5717	276.531	Active	Siliciclastic Sedimentary Rocks	1	0	0	0	0
MOO2018_Howard	S227WTS014	Howard	Moon	2018	10.1016/j.epsl.2018.09.010	15100	400	90000	11000	5.96026	0.12506	226	5.99	14.6	271	33.2	40.6	0.833948	0.125344	0.16315	1	0	39.6849	-123.753	39.6779	-123.789	980.87	11.1534	296.36	276.614	287.091	281.852	34.1244	20.3361	18.5888	24.3498	423.121	58.7327	1534.44	12106.3	0.575259	268.178	Active	Siliciclastic Sedimentary Rocks	1	0	0	0	0
MOO2018_Juan	S227WTS013	Juan	Moon	2018	10.1016/j.epsl.2018.09.011	17900	400	110000	13000	6.14525	0.120276	196	4.39	12.4	229	27.1	33.6	0.855895	0.120442	0.159783	1	0	39.7097	-123.753	39.7032	-123.803	976.46	19.4527	331.96	328.901	334.842	331.872	35.3814	24.0876	22.5375	27.3355	461.891	66.4212	1585.22	12296.7	0.569479	330.101	Active	Siliciclastic Sedimentary Rocks	1	0	0	0	0
NAK2014_ABK-R1	S144WTS001	ABK-R1	Nakamura	2014	10.1186/2197-4284-1-9	69600	3600	529000	52000	7.60057	0.111077	60.7	3.16	4.79	56.4	5.61	7.45	1.07624	0.112268	0.153869	0	0	37.4208	140.737	37.4303	140.754	936.23	7.66146	652.74	659.069	653.375	656.222	20.5483	19.1021	19.5726	19.741	408.352	87.3944	1333.44	14571.6	0.144913	115.576	Active	Acid Plutonic Rocks	1	0	0	0	0
NAK2014_ABK-R3	S144WTS002	ABK-R3	Nakamura	2014	10.1186/2197-4284-1-9	48000	2200	316000	26000	6.58333	0.094183	81.6	3.75	6.12	87.5	7.25	10.5	0.932571	0.0947483	0.14151	0	0	37.4315	140.775	37.45	140.807	947.11	105.635	562.03	563.884	560.286	562.085	15.4226	12.6751	12.0066	13.3681	290.06	88.6809	1311.1	14107.8	0.153326	99.5047	Active	Acid Plutonic Rocks	1	0	0	0	0
NIC2011_GC-74	S400WTS001	GC-74	Nichols	2011	N/A - GSA Abstract 2011 Annual Meeting	94300	1900	645501	32054.4	6.84519	0.0535901	70.3	1.42	4.4	71.9	3.6	7.2	0.977747	0.0539904	0.11809	0	0	36.076	-111.908	36.0737	-111.897	869.498	2.65038	1287.73	1266.83	1271	1268.92	44.8766	39.9195	52.3735	45.7232	1120.6	85.8465	222.4	1010.8	NaN	4.23401	Active	Siliciclastic Sedimentary Rocks	2	0	0	0	0
NIC2011_GCHC-78	S400WTS002	GCHC-78	Nichols	2011	N/A - GSA Abstract 2011 Annual Meeting	114000	2700	823274	54278	7.2217	0.0700545	80.2	1.91	5.12	77.5	5.15	8.46	1.03484	0.0705903	0.126459	0	0	36.0034	-111.964	36.0416	-111.956	821.356	24.2582	1711.61	1925.35	1912.83	1919.09	45.9792	20.3142	23.7181	30.0038	886.729	156.247	315.229	1761.54	0.211875	4.29279	Active	Siliciclastic Sedimentary Rocks	3	0	0	0	0
NIC2011_GCMC-93	S400WTS003	GCMC-93	Nichols	2011	N/A - GSA Abstract 2011 Annual Meeting	50200	1100	371448	15203.6	7.39935	0.046427	160	3.51	10.1	152	6.24	14.5	1.05263	0.0465465	0.114389	2	0	36.0745	-112.183	36.0947	-112.187	836.734	9.27122	1523.02	1916.72	1896.3	1906.51	51.5203	29.3392	38.017	39.6255	1194.5	114.497	286.846	1397.77	0.635626	4.88508	Active	Siliciclastic Sedimentary Rocks	3	0	0	0	0
NIC2011_GCPR-0	S400WTS004	GCPR-0	Nichols	2011	N/A - GSA Abstract 2011 Annual Meeting	46800	1100	328422	20285.4	7.01756	0.0660872	211	4.97	13.4	211	13	22.4	1	0.0659604	0.123707	0	0	37.2347	-111.997	36.8974	-111.626	808.861	3665.56	1879.72	1880.79	1879.61	1880.2	12.8648	12.0186	12.5661	12.4832	263.536	136.431	299.518	1616.05	0.77914	4.25275	Active	Siliciclastic Sedimentary Rocks	5	0	0	0	0
NIC2011_GCSC-190	S400WTS005	GCSC-190	Nichols	2011	N/A - GSA Abstract 2011 Annual Meeting	82300	1900	505590	27085.5	6.14325	0.0583347	83	1.92	5.28	94.3	5.08	9.62	0.88017	0.0586273	0.120224	1	1	36.1199	-113.166	36.1194	-113.197	864.656	10.7796	1289.68	1418.59	1377.09	1397.84	54.1549	44.5342	56.0809	51.59	1019.22	146.652	284.333	1214.33	0.69596	4.37015	Active	Siliciclastic Sedimentary Rocks	2	0	0	0	0
NIC2011_GCSC-205	S400WTS006	GCSC-205	Nichols	2011	N/A - GSA Abstract 2011 Annual Meeting	156000	4900	1.1196e+06	49328.1	7.17692	0.0541089	42.4	1.34	2.85	41.1	1.84	4.03	1.03163	0.0548001	0.118881	0	0	36.0289	-113.311	36.0089	-113.337	870.828	27.7107	1228.15	1179.29	1179.08	1179.18	47.0404	48.6395	59.3956	51.6918	1067.72	181.225	275.39	1134.66	0.74671	4.05286	Active	Siliciclastic Sedimentary Rocks	2	0	0	0	0
NIC2011_GCSC-92	S400WTS007	GCSC-92	Nichols	2011	N/A - GSA Abstract 2011 Annual Meeting	65100	1400	391805	27546.9	6.01851	0.0735232	117	2.52	7.36	136	9.57	15.1	0.860294	0.0735902	0.127611	1	0	36.0812	-112.163	36.0957	-112.164	846.689	3.06342	1470.23	2026.62	2060	2043.31	64.5113	24.2334	26.971	38.5719	1265.96	105.862	259.25	1210.25	NaN	4.88467	Active	Siliciclastic Sedimentary Rocks	3	0	0	0	0
NIC2011_GCTR-68	S400WTS008	GCTR-68	Nichols	2011	N/A - GSA Abstract 2011 Annual Meeting	61900	1700	449428	16279.7	7.26054	0.0454573	140	3.85	9.12	135	4.91	12.7	1.03704	0.0455966	0.114427	0	0	36.0596	-111.824	36.0838	-111.824	826.31	13.9656	1704.37	1689.67	1687.64	1688.65	49.2714	59.4333	66.2553	58.32	1083.48	122.307	280.952	1413.29	0.643402	3.92173	Active	Siliciclastic Sedimentary Rocks	3	0	0	0	0
NIC2014_QLD 11	S132WTS012	QLD 11	Nichols	2014	10.1016/j.geomorph.2014.07.019	189000	3000	644003	36835.1	3.40742	0.0593587	13.7	0.222	0.855	28.7	1.68	3.03	0.477352	0.0607381	0.122641	1	1	-16.7831	145.643	-16.7925	145.644	965.09	4.18663	412.47	408.056	406.4	407.228	8.70833	8.49431	16.3659	11.1895	351.97	111.682	2169.33	12669	0.225245	0	Post-Orogenic	Siliciclastic Sedimentary Rocks	1	0	0	0	0
NIC2014_QLD 14	S132WTS015	QLD 14	Nichols	2014	10.1016/j.geomorph.2014.07.019	66000	2000	1.13739e+06	26253	17.2331	0.0380926	38.1	1.16	2.54	14.6	0.35	1.35	2.60959	0.0387512	0.113993	2	2	-16.8158	145.673	-16.8158	145.681	976.2	1.40896	294.89	299.4	260	279.7	40.7107	43.8476	39.0092	41.1892	576.522	5.84488	2705	15122.5	NaN	0	Post-Orogenic	Acid Plutonic Rocks	2	0	0	0	0
NIC2014_QLD 2	S132WTS002	QLD 2	Nichols	2014	10.1016/j.geomorph.2014.07.019	172000	5000	451766	51540.6	2.62655	0.117732	15.1	0.448	1.01	41.5	4.8	6.02	0.363855	0.119407	0.159739	1	1	-16.8407	145.621	-16.8224	145.635	965.23	7.82205	407.92	410.75	405.222	407.986	11.5763	7.74529	5.93954	8.42037	233.984	104.36	1855.2	10827.8	0.247621	0	Post-Orogenic	Siliciclastic Sedimentary Rocks	1	0	0	0	0
NIC2014_QLD 4	S132WTS004	QLD 4	Nichols	2014	10.1016/j.geomorph.2014.07.019	231000	1000	1.10671e+06	49172.9	4.79097	0.0446418	10.9	0.0486	0.664	15.9	0.732	1.59	0.685535	0.0462531	0.117094	1	1	-16.9444	145.682	-16.9475	145.689	967.89	1.2361	295.37	277.333	279.117	278.225	37.3426	52.5544	48.3182	46.0717	802.85	136.961	2577.5	14378	0.154635	0	Post-Orogenic	Siliciclastic Sedimentary Rocks	1	0	0	0	0
NIC2014_QLD 8	S132WTS008	QLD 8	Nichols	2014	10.1016/j.geomorph.2014.07.019	197000	3000	1.27881e+06	31704.3	6.4914	0.0290956	15.2	0.237	0.947	16.1	0.414	1.5	0.944099	0.0300722	0.11208	1	0	-16.9868	145.574	-16.9016	145.552	942.15	135.129	603.95	601.933	603.082	602.508	15.4606	14.1269	14.3115	14.633	315.17	168.031	1625.83	9562.98	0.225003	0	Post-Orogenic	Acid Plutonic Rocks	4	0	0	0	0
PLA2010_ADBA-12SDsm	S067WTS007	ADBA-12SDsm	Placzek	2010	10.1016/j.epsl.2010.03.006	10400000	190000	51500000	1700000	4.95192	0.037728	0.56	0.0157	0.0533	0.587	0.039	0.11	0.954003	0.0721125	0.210179	0	0	-23.3423	-69.2886	-23.4025	-69.4608	796.16	757.933	2041.75	2041.47	2042.43	2041.95	6.24362	8.77887	11.2474	8.75664	200.908	81.3904	6.42264	27.0187	0.631593	80.7737	Active	Siliciclastic Sedimentary Rocks	7	0	0	0	0
PLA2010_ADBA-13SD	S067WTS008	ADBA-13SD	Placzek	2010	10.1016/j.epsl.2010.03.006	20260000	460000	105800000	5700000	5.22211	0.0584641	0.394	0.0158	0.044	0.307	0.0485	0.0926	1.28339	0.162991	0.321638	2	0	-23.6393	-68.9339	-23.5891	-69.275	734.09	5126.07	2694.53	2694.64	2694.49	2694.57	7.63885	10.1548	12.636	10.1432	229.905	129.337	13.8202	59.4362	0.573633	71.3751	Active	Siliciclastic Sedimentary Rocks	9	0	0	0	0
PLA2010_ADBA-2SD	S067WTS002	ADBA-2SD	Placzek	2010	10.1016/j.epsl.2010.03.006	8840000	300000	51800000	2000000	5.85973	0.0514046	1.32	0.0551	0.111	1.28	0.0723	0.177	1.03125	0.0702347	0.161842	0	0	-23.6392	-68.8874	-23.5359	-69.0308	727.41	4194.46	2774.33	2774.29	2774.04	2774.16	7.74059	10.1143	12.5169	10.1239	229.602	129.152	14.8497	64.0408	0.573583	70.6004	Active	Siliciclastic Sedimentary Rocks	9	0	0	0	0
PLA2010_ADBA-5SD	S067WTS004	ADBA-5SD	Placzek	2010	10.1016/j.epsl.2010.03.006	6920000	210000	31200000	1400000	4.50867	0.0541702	0.976	0.0388	0.0848	1.32	0.086	0.187	0.739394	0.0763224	0.166188	1	1	-23.3422	-69.2899	-23.395	-69.4742	796.43	763.46	2038.74	2038.33	2038.57	2038.45	6.33535	8.86774	11.3404	8.84783	202.745	84.6672	6.39198	26.8899	0.630965	80.7737	Active	Siliciclastic Sedimentary Rocks	7	0	0	0	0
PLA2010_ADSA-1SD	S067WTS005	ADSA-1SD	Placzek	2010	10.1016/j.epsl.2010.03.006	8040000	580000	37300000	8100000	4.6393	0.228827	2.16	0.178	0.23	2.97	0.774	0.833	0.727273	0.273325	0.300004	0	0	-23.9868	-68.0647	-23.7856	-68.1093	679.82	242.915	3367.88	3368.85	3364.7	3366.78	10.238	14.8551	19.7017	14.9316	327.069	100.737	40.658	183.99	0.551032	22.4212	Active	Pyroclastic	4	0	0	0	0
PLA2010_ADSO-3SD	S067WTS006	ADSO-3SD	Placzek	2010	10.1016/j.epsl.2010.03.006	6770000	610000	18400000	5200000	2.71787	0.296625	0.454	0.0681	0.0815	1.3	0.534	0.559	0.349231	0.4373	0.465968	1	0	-24.0689	-70.0556	-24.0892	-70.0634	875.07	8.48695	1231.13	1230.09	1248.11	1239.1	15.4236	15.8379	13.118	14.7932	309.489	29.847	0.0909091	0.363636	NaN	331.369	Active	Intermediate Plutonic Rocks	2	0	0	0	0
PLA2010_ADSO-6SD	S067WTS001	ADSO-6SD	Placzek	2010	10.1016/j.epsl.2010.03.006	15380000	540000	78000000	2800000	5.07152	0.0502133	1.15	0.051	0.0997	1.31	0.0685	0.178	0.877863	0.0685637	0.16118	1	0	-24.1963	-68.594	-24.12	-68.5935	666.08	137.683	3611.18	3605.45	3607.14	3606.3	14.0709	16.0226	19.7934	16.6289	365.73	119.838	26.1932	119.631	NaN	124.968	Active	Unconsolidated Sediments	6	0	0	0	0
PLA2010_ASOI-SD	S067WTS003	ASOI-SD	Placzek	2010	10.1016/j.epsl.2010.03.006	6470000	260000	33000000	2200000	5.10046	0.0778416	0.907	0.0486	0.0864	1.02	0.108	0.176	0.889216	0.118669	0.197098	0	0	-24.2489	-70.3129	-24.0959	-70.2807	815.69	532.564	1800.13	1798.6	1793.48	1796.04	13.8399	16.0792	18.085	16.0014	361.689	135.145	1.41813	5.69152	0.537516	138.195	Active	Intermediate Plutonic Rocks	4	0	0	0	0
POR2015_02-117-xf	S108WTS007	02-117-xf	Portenga	2015	10.1016/j.geomorph.2014.09.027	78500	2600	494007	21448.5	6.29308	0.0546084	198	6.56	13.4	213	9.28	20.6	0.929577	0.0547345	0.118041	1	0	27.412	90.1989	27.3088	90.1252	685.68	287.275	3213.17	3209.6	3221.99	3215.8	38.0629	43.6019	45.4019	42.3556	922.148	247.583	1153.87	9175.52	0.283216	48.4572	Active	Metamorphic Rocks	5	0	0	0	0
POR2015_02-122-xf	S108WTS009	02-122-xf	Portenga	2015	10.1016/j.geomorph.2014.09.027	38400	800	242985	14389.7	6.32772	0.0627783	361	7.52	22.6	390	23.1	40.8	0.925641	0.0627871	0.121916	1	0	27.3879	90.1654	27.2483	90.0891	699.41	444.81	3001.92	2999.72	3001.73	3000.72	40.1241	45.7501	46.8143	44.2295	959.694	254.914	1192.29	9316.77	0.265467	48.4572	Active	Metamorphic Rocks	5	0	0	0	0
POR2015_02-127-xf	S108WTS012	02-127-xf	Portenga	2015	10.1016/j.geomorph.2014.09.027	21800	700	163368	15896.5	7.49396	0.102466	500	16.1	33.6	461	44.9	59.9	1.0846	0.102582	0.146284	0	0	27.185	90.2562	27.2233	90.1903	735.79	75.2642	2600.37	2567.75	2621.06	2594.41	54.0154	61.9873	60.9554	58.986	1288.37	150.666	1543.96	12028.4	0.235898	51.2231	Active	Siliciclastic Sedimentary Rocks	3	0	0	0	0
POR2015_02-135-xf	S108WTS018	02-135-xf	Portenga	2015	10.1016/j.geomorph.2014.09.027	41200	1100	285871	21356.6	6.93861	0.0793348	501	13.4	32.5	489	36.6	55.7	1.02454	0.079482	0.131083	0	0	27.6937	89.9361	27.1774	90.0699	635.69	7416.89	3598.66	3594.2	3593.68	3593.94	47.8941	53.532	55.4814	52.3025	1137.69	335.05	742.399	5976.66	0.370076	42.1075	Active	Metamorphic Rocks	5	584.528	7.88104	491	6.62
POR2015_02-138-xf	S108WTS020	02-138-xf	Portenga	2015	10.1016/j.geomorph.2014.09.027	47400	1000	261718	16230.9	5.52147	0.0655071	466	9.85	29.2	569	35.3	60.4	0.818981	0.0655407	0.123266	1	1	27.7205	89.896	27.2684	90.0385	624.95	6382.22	3758.69	3754.17	3755.05	3754.61	47.5971	53.1534	55.4058	52.0521	1133.08	340.134	645.383	5301.89	0.394601	40.7549	Active	Metamorphic Rocks	5	584.528	9.15869	491	7.69
POR2015_02-139-xf	S108WTS021	02-139-xf	Portenga	2015	10.1016/j.geomorph.2014.09.027	35600	700	225366	11826.9	6.33051	0.0560414	218	4.3	13.6	239	12.6	24.2	0.912134	0.0562888	0.118931	1	0	27.2352	89.9466	27.2673	90.0223	793.98	90.1613	2012.32	1991.01	1972.99	1982	49.7381	53.1276	53.7545	52.2067	1117.38	177.312	1515.97	11189.2	0.17716	53.5443	Active	Metamorphic Rocks	3	0	0	0	0
POR2015_02-145-xf	S108WTS025	02-145-xf	Portenga	2015	10.1016/j.geomorph.2014.09.027	45500	1000	325730	28938.6	7.15891	0.0915204	517	11.4	32.6	487	43.3	60.3	1.0616	0.0916052	0.138951	0	0	27.8292	89.8952	27.4437	89.9065	615.32	5718.5	3914.05	3909.39	3909.95	3909.67	47.9055	53.052	55.3617	52.1064	1132.49	344.866	568.122	4774.27	0.420015	39.7483	Active	Metamorphic Rocks	5	584.528	10.2217	491	8.59
POR2015_02-152-xf	S108WTS028	02-152-xf	Portenga	2015	10.1016/j.geomorph.2014.09.027	76800	1500	476044	20282.8	6.19849	0.0468703	212	4.15	13.2	232	9.91	22.3	0.913793	0.0469874	0.114525	1	0	27.7493	89.8756	27.6925	89.913	678.58	82.7377	3207.08	3212.62	3223.37	3217.99	48.7905	52.8907	56.9265	52.8692	1122.92	250.838	702.514	5661.27	0.430466	38.8034	Active	Metamorphic Rocks	1	0	0	0	0
POR2015_02-209-xf	S108WTS031	02-209-xf	Portenga	2015	10.1016/j.geomorph.2014.09.027	31600	900	214983	16256.3	6.80325	0.0808028	1080	30.6	70.5	1050	79.7	121	1.02857	0.0810204	0.132442	0	0	28.0669	89.9581	27.9754	90.006	552.63	368.157	4939.12	4932.59	4936.69	4934.64	48.645	57.9757	59.1746	55.2651	1231.74	345.483	306.199	3278.21	0.503047	36.6657	Active	Metamorphic Rocks	1	127.796	34.7123	112.4	30.53
POR2015_02-212-xf	S108WTS034	02-212-xf	Portenga	2015	10.1016/j.geomorph.2014.09.027	24500	800	147533	13977.6	6.02176	0.100211	1380	45.2	93.4	1520	144	195	0.907895	0.100239	0.145048	0	0	28.0858	89.9334	27.9996	89.9902	550.14	229.217	4980.83	4978.39	4981.74	4980.06	49.2859	57.5877	58.472	55.1152	1229.38	297.822	298.395	3217.78	0.508077	36.2891	Active	Metamorphic Rocks	1	69.8829	30.4877	66.2	28.87
POR2015_02-223-xf	S108WTS037	02-223-xf	Portenga	2015	10.1016/j.geomorph.2014.09.027	56800	1400	387523	24633.4	6.82258	0.0681776	545	13.5	34.9	534	34	57.2	1.0206	0.0683191	0.124798	0	0	27.9054	89.8933	27.8504	89.8769	570.86	102.379	4701.23	4707.33	4708.79	4708.06	35.6655	28.76	25.7084	30.0446	656.446	121.161	349.448	3497.32	0.515742	37.5328	Active	Metamorphic Rocks	1	0	0	3.1	3.02
POR2015_02-232-xf	S108WTS039	02-232-xf	Portenga	2015	10.1016/j.geomorph.2014.09.027	142800	2700	976743	35775.7	6.83993	0.0412198	155	2.94	9.65	153	5.64	14.4	1.01307	0.0414564	0.112846	0	0	27.7988	89.8059	27.7891	89.8089	633.88	2.16135	3756.62	3769.22	3962.5	3865.86	57.3978	62.4585	56.8472	58.9012	1256.76	78.0928	484	4441.5	0.464608	38.421	Active	Metamorphic Rocks	1	0	0	0	0
POR2015_99-17-xf	S108WTS046	99-17-xf	Portenga	2015	10.1016/j.geomorph.2014.09.027	93700	1500	588118	19642	6.27661	0.0370365	110	1.77	6.77	120	4.04	11.2	0.916667	0.0373144	0.111799	1	1	27.5256	89.7827	27.5238	89.8702	757.08	113.433	2411.08	2404.16	2408.85	2406.51	41.1048	45.8374	50.4424	45.7949	989.937	179.423	1036.14	7542.78	0.318692	47.6963	Active	Metamorphic Rocks	1	0	0	0	0
POR2015_99-19-xf	S108WTS047	99-19-xf	Portenga	2015	10.1016/j.geomorph.2014.09.027	73500	1300	530286	19889.5	7.21478	0.0414682	122	2.16	7.51	117	4.41	11	1.04274	0.0416434	0.112377	2	0	27.503	89.8251	27.5213	89.8327	778.69	6.50867	2224.14	2185.65	2264.29	2224.97	40.3441	49.2283	53.1939	47.5888	1085.03	130.877	1082.62	7479.88	NaN	46.7616	Active	Metamorphic Rocks	1	0	0	0	0
POR2019_POT01	S186WTS001	POT01	Portenga	2019	10.1130/B31840.1	283000	5500	1.62073e+06	36162.4	5.72697	0.0295896	12.4	0.247	0.79	15.1	0.35	1.39	0.821192	0.030562	0.111949	1	1	39.0636	-78.3816	38.9304	-77.1154	968.97	30019.5	382.33	389.752	388.913	389.332	11.2681	10.7868	10.2783	10.7777	225.404	159.496	1001.02	8258.29	0.386394	0	Post-Orogenic	Siliciclastic Sedimentary Rocks	10	0	0	0	0
POR2019_POT12	S186WTS009	POT12	Portenga	2019	10.1130/B31840.1	500000	9600	2.99367e+06	58734.7	5.98734	0.0274512	6.16	0.124	0.401	6.99	0.149	0.669	0.881259	0.0293188	0.115749	1	1	39.9735	-77.7395	39.7154	-77.8246	984.38	1316.37	267.55	271.721	270.608	271.165	7.94504	8.60789	8.36522	8.30605	171.93	140.413	1019.29	8480.57	0.361391	0	Post-Orogenic	Siliciclastic Sedimentary Rocks	6	0	0	0	0
POR2019_POT30	S186WTS027	POT30	Portenga	2019	10.1130/B31840.1	309000	7400	1.82152e+06	56068.8	5.89489	0.0390001	8.92	0.221	0.587	10.4	0.339	1.01	0.857692	0.0409432	0.117311	1	1	38.6516	-77.7877	38.6293	-77.7641	1000.75	21.8643	138.33	141.511	140.174	140.843	2.56447	1.7771	1.90081	2.08079	45.9513	12.2205	1041.32	8192.82	0.554703	0	Post-Orogenic	Basic Volcanic Rocks	3	0	0	0	0
POR2019_POT39	S186WTS036	POT39	Portenga	2019	10.1130/B31840.1	554000	12800	3.60347e+06	109755	6.50445	0.03823	5.96	0.145	0.397	6.15	0.205	0.615	0.969106	0.0412675	0.120154	0	0	38.9546	-78.0567	38.9746	-78.0822	971.56	13.3449	367.5	375.431	385.214	380.323	15.6355	18.0081	20.6947	18.1128	366.138	61.6707	1050.19	8640.43	0.496997	0	Post-Orogenic	Basic Volcanic Rocks	2	0	0	0	0
POR2019_POT42	S186WTS039	POT42	Portenga	2019	10.1130/B31840.1	1110000	18300	6.11398e+06	152323	5.50809	0.0298749	2.67	0.049	0.182	3.2	0.0944	0.34	0.834375	0.0347426	0.126236	1	1	38.2614	-78.9273	38.2512	-78.8913	973.57	15.8004	365.63	369.194	368	368.597	3.52843	2.246	2.68743	2.82062	66.8516	28.1027	990.708	7794.83	0.634146	0	Post-Orogenic	Siliciclastic Sedimentary Rocks	2	0	0	0	0
POR2019_POT48	S186WTS044	POT48	Portenga	2019	10.1130/B31840.1	873000	16500	4.7886e+06	94548.1	5.48522	0.0273325	3.64	0.0745	0.244	4.47	0.0999	0.447	0.814318	0.0303047	0.120389	1	1	39.0414	-78.9274	39.0704	-78.9563	970.87	13.2283	385.92	389.415	378.5	383.958	11.4227	12.096	16.7892	13.436	293.136	167.425	918.579	7449	0.624849	0	Post-Orogenic	Siliciclastic Sedimentary Rocks	3	0	0	0	0
POR2019_POT51	S186WTS047	POT51	Portenga	2019	10.1130/B31840.1	379000	7300	1.37455e+06	35480.7	3.62679	0.0322068	13.6	0.268	0.863	26.6	0.702	2.44	0.511278	0.0329364	0.111539	1	1	39.2244	-79.4774	39.2362	-79.4525	914.94	8.58803	865.72	883.353	881.25	882.301	13.3272	8.9678	7.48394	9.92632	208.837	33.1772	1218.33	11437.2	0.0855496	0	Post-Orogenic	Siliciclastic Sedimentary Rocks	1	0	0	0	0
POR2019_POT53	S186WTS049	POT53	Portenga	2019	10.1130/B31840.1	572000	9600	3.70161e+06	103604	6.47135	0.0326353	7.78	0.136	0.496	8.16	0.245	0.792	0.953431	0.0347426	0.116124	1	0	39.3708	-79.1248	39.3987	-79.1329	932.97	21.479	705.67	712.069	715.524	713.796	17.2893	14.4882	13.035	14.9375	337.221	47.3224	1069.85	9566.12	0.212624	0	Post-Orogenic	Siliciclastic Sedimentary Rocks	1	0	0	0	0
POR2019_POT62	S186WTS053	POT62	Portenga	2019	10.1130/B31840.1	307000	7600	3.58197e+06	81837.8	11.6677	0.0336873	11.3	0.287	0.741	6.26	0.157	0.61	1.80511	0.0356941	0.117454	2	2	39.6753	-78.6138	39.6884	-78.5818	972.09	29.2533	374.27	381.078	386.613	383.845	15.6115	15.0012	11.2755	13.9628	274.873	24.2426	948.913	8035.96	0.55613	0	Post-Orogenic	Carbonate Sedimentary Rocks	4	0	0	0	0
POR2019_POT72	S186WTS061	POT72	Portenga	2019	10.1130/B31840.1	246000	5800	1.58693e+06	37072	6.45095	0.0331906	12.3	0.297	0.801	13.2	0.321	1.23	0.931818	0.0342698	0.113683	1	0	39.5676	-77.0227	39.5679	-77.0596	992.03	34.2251	207.34	210.662	210.571	210.617	5.93266	3.5221	3.00939	4.15472	87.6193	16.5066	1080.71	8657.32	0.457418	0	Post-Orogenic	Basic Volcanic Rocks	3	0	0	0	0
REG2013_JP08003	S093WTS003	JP08003	Regalla	2013	10.1016/j.geomorph.2013.04.029	50500	1300	346047	13755.6	6.85241	0.0473581	74.8	1.93	4.84	77.2	3.09	7.37	0.968912	0.0476217	0.115329	0	0	37.356	140.882	37.3536	140.917	953.03	28.6298	513.24	510.553	517.222	513.887	16.5437	12.5208	12.959	14.0078	307.276	38.093	1327.17	14037.4	0.154232	66.0474	Active	Acid Plutonic Rocks	2	0	0	0	0
REG2013_JP08004	S093WTS004	JP08004	Regalla	2013	10.1016/j.geomorph.2013.04.029	50400	1200	339470	18893	6.73551	0.0605335	81.4	1.94	5.2	85.3	4.78	8.8	0.954279	0.0608951	0.121342	0	0	37.342	140.776	37.289	140.839	939.55	148.576	624.17	622.324	623.007	622.665	15.8573	15.1199	14.6662	15.2145	319.748	96.3707	1348.67	14884.9	0.121513	82.6057	Active	Acid Plutonic Rocks	2	0	0	0	0
REG2013_JP08014	S093WTS008	JP08014	Regalla	2013	10.1016/j.geomorph.2013.04.029	73500	1700	477315	17947.7	6.49408	0.0441455	53	1.23	3.37	57.3	2.18	5.43	0.924956	0.044565	0.11412	1	0	37.6584	140.753	37.656	140.895	950.77	176.32	528.82	527.393	527.903	527.648	17.4583	12.934	11.1827	13.8583	282.487	99.824	1278.03	13473.3	0.0974238	114.189	Active	Acid Plutonic Rocks	5	0	0	0	0
REU2015_SAP03	S156WTS001	SAP03	Reusser	2015	10.1130/G36272.1	624000	18000	3.34294e+06	72820.6	5.35727	0.0361472	4.79	0.147	0.335	6.1	0.146	0.594	0.785246	0.0389187	0.11989	1	1	37.1495	-79.5483	36.9166	-78.74	977.98	7680.83	324.15	324.91	323.615	324.263	9.10738	6.87639	6.43342	7.4724	152.364	137.308	1089.98	8319.41	0.426156	0	Post-Orogenic	Metamorphic Rocks	8	0	0	0	0
REU2015_SAP04	S156WTS002	SAP04	Reusser	2015	10.1130/G36272.1	550000	16000	2.89447e+06	64279.1	5.26268	0.0365986	5.24	0.161	0.365	6.83	0.165	0.659	0.767204	0.0390852	0.119002	1	1	36.5402	-79.869	36.643	-79.0904	982.66	6700.32	287.58	288.381	287.105	287.743	7.19511	4.63277	4.30081	5.37623	103.252	86.6994	1172.16	8868.66	0.348437	0	Post-Orogenic	Metamorphic Rocks	6	0	0	0	0
REU2015_SAP12	S156WTS006	SAP12	Reusser	2015	10.1130/G36272.1	555000	15000	2.8908e+06	63742.7	5.20865	0.0348808	4.63	0.133	0.32	6.07	0.147	0.592	0.762768	0.037572	0.119535	1	1	34.5258	-82.0317	34.0463	-81.1897	991.7	6285.63	216.73	217.224	216.327	216.775	4.79909	3.11465	2.83497	3.5829	67.5071	92.4813	1269.72	8529.73	0.35839	0	Post-Orogenic	Metamorphic Rocks	5	0	0	0	0
REU2015_SAP15	S401WTS001	SAP15	Reusser	2015	10.1130/G36272.1	638000	17000	3.66477e+06	91364.7	5.74415	0.0364901	3.71	0.107	0.26	4.3	0.122	0.438	0.862791	0.0404571	0.12364	1	1	34.0352	-82.568	34.0211	-82.591	998.671	7.64047	162.207	161.3	161.5	161.4	4.02382	1.85987	2.00455	2.62941	51.6667	11.3594	1204.08	7954.08	NaN	0	Post-Orogenic	Metamorphic Rocks	1	0	0	0	0
REU2015_SAP17	S156WTS014	SAP17	Reusser	2015	10.1130/G36272.1	281000	8000	1.62996e+06	50701.4	5.80057	0.0421676	11.9	0.346	0.796	14.1	0.458	1.35	0.843972	0.0435946	0.116796	1	1	34.7616	-83.0462	34.3547	-82.8172	963.85	5434.27	428.11	428.316	426.755	427.536	10.4061	7.46129	6.83672	8.23471	163.006	142.263	1565.03	11142.3	0.164596	0	Post-Orogenic	Metamorphic Rocks	3	0	0	0	0
REU2015_SAP36	S401WTS002	SAP36	Reusser	2015	10.1130/G36272.1	442000	12000	2.77795e+06	72016.9	6.28496	0.0375388	6.16	0.175	0.419	6.6	0.186	0.646	0.933333	0.0400161	0.119193	1	0	35.7473	-80.4095	35.7289	-80.4069	990.583	6.87381	228.623	227.192	227.143	227.168	3.93013	2.22644	1.9698	2.70879	49.963	7.19687	1129.27	8204.82	NaN	0	Post-Orogenic	Acid Plutonic Rocks	2	0	0	0	0
REU2015_SAP39	S156WTS011	SAP39	Reusser	2015	10.1130/G36272.1	635000	18000	3.7816e+06	86745.4	5.95527	0.0364652	4.99	0.15	0.347	5.64	0.143	0.555	0.884752	0.0393251	0.120495	1	1	37.1341	-79.8435	37.1055	-79.293	970.26	4615.02	389.91	390.846	389.21	390.028	11.1235	8.61054	8.15685	9.29697	190.999	140.097	1090.13	8390.77	0.399976	0	Post-Orogenic	Metamorphic Rocks	6	0	0	0	0
REU2015_SAP44	S401WTS003	SAP44	Reusser	2015	10.1130/G36272.1	1261000	29000	6.67084e+06	170547	5.29012	0.0343877	2.24	0.0584	0.161	2.78	0.0863	0.303	0.805755	0.0405388	0.130558	1	1	37.1723	-79.8745	37.169	-79.8728	973.914	0.421433	376.145	386	376.881	381.441	13.1769	20.8158	16.8344	16.9423	279.5	2.92973	1092.18	8373.84	0.501697	0	Post-Orogenic	Acid Plutonic Rocks	1	0	0	0	0
REU2015_SAP49	S401WTS004	SAP49	Reusser	2015	10.1130/G36272.1	528000	13000	3.42137e+06	90898.2	6.47986	0.0362223	5.75	0.149	0.387	5.94	0.174	0.589	0.968013	0.0391096	0.119843	0	0	37.277	-79.7203	37.261	-79.7415	978.379	12.1235	331.307	330.72	327.583	329.152	10.3724	7.32257	4.86758	7.52086	180.403	44.5435	1070.58	8140.11	0.573242	0	Post-Orogenic	Metamorphic Rocks	2	0	0	0	0
REU2015_SAP63	S401WTS005	SAP63	Reusser	2015	10.1130/G36272.1	364000	10000	2.39278e+06	55883.8	6.57357	0.0360584	8.31	0.237	0.561	8.57	0.214	0.817	0.969662	0.0379068	0.116815	0	0	34.2296	-84.1834	34.2122	-84.1972	973.606	7.78192	377.422	372.125	367	369.562	8.41565	6.08605	4.21394	6.23854	150.841	50.971	1445.67	10243.6	0.128759	0	Post-Orogenic	Metamorphic Rocks	1	0	0	0	0
REU2015_SAP65	S401WTS006	SAP65	Reusser	2015	10.1130/G36272.1	618000	16000	3.57227e+06	83105.6	5.78036	0.0348067	4.12	0.114	0.285	4.76	0.125	0.477	0.865546	0.0381476	0.121767	1	1	33.0132	-84.8279	33.0047	-84.8403	986.857	6.54557	261.709	260.808	260.667	260.737	2.92892	1.46629	1.31992	1.90504	39.3107	3.7157	1343.5	9245.5	NaN	0	Post-Orogenic	Metamorphic Rocks	2	0	0	0	0
REU2015_SAP68	S401WTS007	SAP68	Reusser	2015	10.1130/G36272.1	513000	15000	2.87894e+06	63494.9	5.61196	0.0366249	4.98	0.154	0.348	6.01	0.146	0.587	0.828619	0.0393245	0.120094	1	1	33.2123	-84.9684	33.2107	-84.994	989.608	16.3442	240.768	237.431	236.375	236.903	4.2226	2.24284	2.21406	2.89317	55.046	6.28428	1359.85	9460.1	0.329469	0	Post-Orogenic	Metamorphic Rocks	1	0	0	0	0
REU2015_SAP69	S156WTS016	SAP69	Reusser	2015	10.1130/G36272.1	329000	8000	163766	20171	0.497768	0.125547	9.3	0.234	0.613	143	17.7	21.6	0.065035	0.126308	0.164804	1	1	34.1303	-84.2189	33.4771	-84.9029	972.66	6237.71	375.08	375.289	374.467	374.878	6.89878	4.4768	4.0021	5.12589	100.693	98.6195	1431.67	10154.8	0.117405	0	Post-Orogenic	Metamorphic Rocks	3	0	0	0	0
RIE2000_AL-10	S005WTS029	AL-10	Riebe	2000	10.1130/0091-7613(2000)28<803:EEADIT>2.0.CO;2	362403	24775.1	2359000	133000	6.50932	0.0886128	29.1	2.01	2.65	30.9	1.78	3.24	0.941748	0.0899406	0.138879	0	0	40.1548	-120.641	40.1546	-120.638	818.39	0.124804	1785.15	1768.38	1721.02	1744.7	21.605	16.1059	26.3378	21.3496	406	10	662.3	4389.05	NaN	11.5143	Active	Acid Plutonic Rocks	1	0	0	0	0
RIE2000_AL-11	S005WTS007	AL-11	Riebe	2000	10.1130/0091-7613(2000)28<803:EEADIT>2.0.CO;2	562503	32008.7	3285000	183000	5.83997	0.0796331	17.7	1.03	1.48	20.9	1.2	2.2	0.84689	0.0817493	0.134432	1	0	40.1611	-120.639	40.164	-120.633	825.81	0.795655	1710.97	1721.5	1709	1715.25	24.7139	26.5888	26.4427	25.9151	436.214	35.0065	655.347	4330.83	NaN	11.5143	Active	Acid Plutonic Rocks	1	0	0	0	0
RIE2000_AL-2	S005WTS022	AL-2	Riebe	2000	10.1130/0091-7613(2000)28<803:EEADIT>2.0.CO;2	313486	21881.6	2211000	137000	7.05294	0.0933358	33.8	2.38	3.12	33.2	2.09	3.58	1.01807	0.0944515	0.141945	0	0	40.1729	-120.647	40.172	-120.646	817.61	0.0267579	1793.02	1767.88	1719.46	1743.67	12.2818	23.874	30.6173	22.2577	531.433	6.47215	672	4477	NaN	11.5143	Active	Acid Plutonic Rocks	1	0	0	0	0
RIE2000_AL-3	S005WTS023	AL-3	Riebe	2000	10.1130/0091-7613(2000)28<803:EEADIT>2.0.CO;2	296939	17903.2	1542000	88000	5.19298	0.0830181	34.6	2.11	2.95	46.3	2.67	4.84	0.7473	0.083931	0.134896	1	1	40.1811	-120.637	40.1798	-120.636	821.84	0.0751826	1749.35	1760.97	1708	1734.48	20.1914	19.6588	27.405	22.4184	432.524	8.73262	650	4290	NaN	11.5143	Active	Acid Plutonic Rocks	1	0	0	0	0
RIE2000_AL-4	S005WTS024	AL-4	Riebe	2000	10.1130/0091-7613(2000)28<803:EEADIT>2.0.CO;2	481758	31556.6	2847000	159000	5.90961	0.0860794	21.3	1.42	1.9	24.9	1.42	2.61	0.855422	0.0877306	0.137637	1	0	40.1798	-120.638	40.1783	-120.637	822.02	0.0219656	1749.09	1765.06	1708	1736.53	29.9936	20.4636	27.405	25.9541	438.773	6.94495	650	4290	NaN	11.5143	Active	Acid Plutonic Rocks	1	0	0	0	0
RIE2000_AL-5	S005WTS025	AL-5	Riebe	2000	10.1130/0091-7613(2000)28<803:EEADIT>2.0.CO;2	378769	27758.9	2444000	137000	6.45248	0.0922673	26	1.93	2.47	27.8	1.59	2.92	0.935252	0.0937091	0.141625	0	0	40.1777	-120.631	40.1784	-120.629	828.16	0.0449302	1687.96	1691.03	1708	1699.51	11.2165	17.2239	27.405	18.6152	443.088	11.2618	627	4106	NaN	11.5143	Active	Acid Plutonic Rocks	1	0	0	0	0
RIE2000_AL-6	S005WTS026	AL-6	Riebe	2000	10.1130/0091-7613(2000)28<803:EEADIT>2.0.CO;2	449840	29205.7	3163000	178000	7.0314	0.0859195	22.9	1.51	2.04	22.4	1.3	2.37	1.02232	0.0878412	0.138312	0	0	40.183	-120.638	40.1836	-120.639	821.48	0.0580094	1756.02	1749.96	1717.41	1733.69	12.8673	18.6253	26.0883	19.1936	419.713	11.5312	645.407	4259.49	NaN	11.5143	Active	Acid Plutonic Rocks	1	0	0	0	0
RIE2000_AL-7	S005WTS027	AL-7	Riebe	2000	10.1130/0091-7613(2000)28<803:EEADIT>2.0.CO;2	743614	42678.2	4494000	251000	6.04346	0.0800839	14.4	0.842	1.21	16.3	0.943	1.73	0.883436	0.0822554	0.135371	1	0	40.1621	-120.652	40.1623	-120.653	816.08	0.0156752	1808.1	1788.63	1788.81	1788.72	15.1805	8.83738	10.6683	11.562	487.031	8.49462	690	4627	NaN	11.5143	Active	Acid Plutonic Rocks	1	0	0	0	0
RIE2000_AL-8	S005WTS006	AL-8	Riebe	2000	10.1130/0091-7613(2000)28<803:EEADIT>2.0.CO;2	377051	23870.9	2266000	127000	6.00979	0.084553	27.2	1.74	2.38	31.3	1.79	3.27	0.86901	0.0858065	0.136275	1	0	40.1553	-120.647	40.1488	-120.649	822.36	1.06892	1745.32	1758.6	1755.75	1757.17	23.7015	9.47681	19.2486	17.4756	439.5	28.511	676	4505	NaN	11.5143	Active	Acid Plutonic Rocks	1	0	0	0	0
RIE2000_FR-4	S005WTS009	FR-4	Riebe	2000	10.1130/0091-7613(2000)28<803:EEADIT>2.0.CO;2	17903.2	4249.74	115000	11000	6.42345	0.255921	221	52.6	54.2	246	23.6	31.8	0.898374	0.256616	0.277231	0	0	39.6343	-121.277	39.6349	-121.281	956.65	0.110721	503.08	433.481	498.247	465.864	46.7856	21.7267	26.153	31.5551	717.5	53.5	1100.89	6077.41	0.252437	7.59539	Active	Acid Plutonic Rocks	1	0	0	0	0
RIE2000_FR-5	S005WTS010	FR-5	Riebe	2000	10.1130/0091-7613(2000)28<803:EEADIT>2.0.CO;2	35715.9	7685.7	258000	27000	7.22367	0.239288	118	25.5	26.4	116	12.2	15.8	1.01724	0.240336	0.261929	0	0	39.6359	-121.274	39.6356	-121.271	948.36	0.0274311	575.11	515.689	552	533.844	24.9944	34.2093	43.7971	34.3336	792.149	28.4137	1198	6659	NaN	7.59539	Active	Acid Plutonic Rocks	1	0	0	0	0
RIE2000_FR-7	S005WTS001	FR-7	Riebe	2000	10.1130/0091-7613(2000)28<803:EEADIT>2.0.CO;2	308513	19440.3	1092000	84000	3.53956	0.0994373	17.3	1.11	1.52	34.5	2.7	4.05	0.501449	0.1012	0.14663	1	1	39.6438	-121.334	39.6374	-121.332	912	0.938253	896.88	905.75	906.542	906.146	25.9151	30.9306	25.8362	27.5606	492.562	52.6699	1462.47	8459.51	NaN	8.46581	Active	Acid Plutonic Rocks	1	0	0	0	0
RIE2000_FR-8	S005WTS012	FR-8	Riebe	2000	10.1130/0091-7613(2000)28<803:EEADIT>2.0.CO;2	231656	15281	2898000	171000	12.5099	0.0885042	26.2	1.75	2.34	14.2	0.873	1.54	1.84507	0.0907804	0.140493	2	2	39.6591	-121.324	39.6582	-121.324	894.8	0.0219431	1055.13	1038.64	1012	1025.32	9.61468	7.09098	12.1177	9.60778	670	0	1515.05	8900.7	NaN	8.46581	Active	Acid Plutonic Rocks	1	0	0	0	0
RIE2000_FR-9	S005WTS013	FR-9	Riebe	2000	10.1130/0091-7613(2000)28<803:EEADIT>2.0.CO;2	430218	27578.1	2215000	133000	5.14855	0.0878326	13.8	0.901	1.22	18.6	1.15	2.01	0.741935	0.0899192	0.139619	1	1	39.6556	-121.327	39.6553	-121.328	896.49	0.00688212	1039.64	1030.82	1011.72	1021.27	7.68362	4.16769	12.2	8.01711	472.024	40.9952	1514	8868	NaN	8.46581	Active	Acid Plutonic Rocks	1	0	0	0	0
RIE2000_GD-1	S005WTS015	GD-1	Riebe	2000	10.1130/0091-7613(2000)28<803:EEADIT>2.0.CO;2	58863.4	7143.18	362000	27000	6.14983	0.14244	128	15.6	17.4	146	11	16.7	0.876712	0.143283	0.177659	0	0	39.8811	-121.346	39.8818	-121.347	861.03	0.0119688	1379.42	1306.55	1122.06	1214.31	57.917	87.257	78.3857	74.5199	1005.89	8.45489	1456	8953	NaN	8.88088	Active	Acid Plutonic Rocks	1	0	0	0	0
RIE2000_GD-10	S005WTS002	GD-10	Riebe	2000	10.1130/0091-7613(2000)28<803:EEADIT>2.0.CO;2	66910.8	7143.18	352000	24000	5.26074	0.126672	85.9	9.2	10.5	115	7.86	12.6	0.746957	0.127052	0.164152	1	0	39.8731	-121.364	39.8684	-121.37	903.05	0.753715	968.65	1030.67	843.859	937.263	53.727	76.5449	35.7926	55.3549	942.167	30.8297	1375.5	8084.8	0.209375	8.88088	Active	Acid Plutonic Rocks	1	0	0	0	0
RIE2000_GD-12	S005WTS003	GD-12	Riebe	2000	10.1130/0091-7613(2000)28<803:EEADIT>2.0.CO;2	50002.3	6148.56	357000	30000	7.13968	0.148937	127	15.6	17.3	126	10.6	15.2	1.00794	0.148881	0.181958	0	0	39.8813	-121.352	39.8881	-121.359	886.92	0.928174	1106.28	1106	1083.41	1094.71	53.8396	87.0043	72.8738	71.2392	990.467	12.1758	1444	8772	NaN	8.88088	Active	Acid Plutonic Rocks	1	0	0	0	0
RIE2000_GD-13	S005WTS004	GD-13	Riebe	2000	10.1130/0091-7613(2000)28<803:EEADIT>2.0.CO;2	67001.2	6419.82	431000	27000	6.43272	0.114478	88.4	8.5	9.98	96.7	6.1	10.4	0.914168	0.114999	0.155924	0	0	39.88	-121.359	39.8862	-121.362	898.38	0.824636	1010.19	1051	954.282	1002.64	53.5399	87.7341	50.0842	63.7861	961.286	8.5057	1393.2	8256.06	NaN	8.88088	Active	Acid Plutonic Rocks	1	0	0	0	0
RIE2000_GD-14	S005WTS005	GD-14	Riebe	2000	10.1130/0091-7613(2000)28<803:EEADIT>2.0.CO;2	55156.2	7233.6	417000	30000	7.56035	0.149584	130	17.2	18.8	122	8.81	13.7	1.06557	0.150732	0.183095	0	0	39.8716	-121.347	39.8647	-121.352	868.05	0.944139	1293.82	1272.75	1158.5	1215.62	49.5299	53.4864	48.6006	50.539	954.462	33.2626	1448.43	8849.24	NaN	8.88088	Active	Acid Plutonic Rocks	1	0	0	0	0
RIE2000_GD-2	S005WTS016	GD-2	Riebe	2000	10.1130/0091-7613(2000)28<803:EEADIT>2.0.CO;2	87074.5	6962.34	600000	39000	6.89065	0.103045	88.6	7.11	8.83	90.2	5.9	9.79	0.982262	0.103529	0.147352	0	0	39.8802	-121.346	39.881	-121.347	859.65	0.0189507	1395.05	1244.36	1007.65	1126	46.9132	96.7849	80.7868	74.8283	993.945	11.5561	1456	8953	NaN	8.88088	Active	Acid Plutonic Rocks	1	0	0	0	0
RIE2000_GD-3	S005WTS017	GD-3	Riebe	2000	10.1130/0091-7613(2000)28<803:EEADIT>2.0.CO;2	81830.1	6781.5	624000	39000	7.62556	0.103799	91.6	7.61	9.34	84.5	5.32	9.05	1.08402	0.104239	0.147876	0	0	39.88	-121.347	39.8807	-121.348	863.69	0.0108717	1376.79	1247.4	1012.42	1129.91	57.0317	95.9209	80.2626	77.7384	992.834	0.500154	1456	8953	NaN	8.88088	Active	Acid Plutonic Rocks	1	0	0	0	0
RIE2000_GD-4	S005WTS018	GD-4	Riebe	2000	10.1130/0091-7613(2000)28<803:EEADIT>2.0.CO;2	155432	9494.1	1077000	72000	6.92908	0.0905552	55.2	3.39	4.71	55.6	3.76	6.12	0.992806	0.09135	0.139271	0	0	39.8876	-121.332	39.8856	-121.332	845.87	0.110814	1513.63	1517	1443.35	1480.18	13.9162	22.8091	43.4968	26.7407	984	3	1449.8	9046.59	NaN	8.88088	Active	Acid Plutonic Rocks	1	0	0	0	0
RIE2000_GD-6	S005WTS020	GD-6	Riebe	2000	10.1130/0091-7613(2000)28<803:EEADIT>2.0.CO;2	136986	10488.7	973000	62000	7.1029	0.0996138	62.5	4.81	6.07	61.5	3.95	6.64	1.01626	0.10024	0.145221	0	0	39.8906	-121.328	39.8881	-121.328	845.71	0.215545	1514.9	1514.3	1439.95	1477.12	19.9237	10.5404	62.9741	31.146	1001.67	10.3709	1447.22	9028.14	NaN	8.88088	Active	Acid Plutonic Rocks	1	0	0	0	0
RIE2000_GD-9	S005WTS021	GD-9	Riebe	2000	10.1130/0091-7613(2000)28<803:EEADIT>2.0.CO;2	155251	11121.7	1293000	106000	8.32844	0.108869	55.4	3.99	5.17	46.5	3.86	5.59	1.1914	0.1099	0.152186	2	0	39.8876	-121.316	39.8865	-121.317	845.49	0.0280283	1516.72	1514.12	1473.09	1493.6	16.2656	10.626	19.7388	15.5434	843.935	70.5337	1442.75	9100.22	NaN	8.88088	Active	Acid Plutonic Rocks	1	0	0	0	0
RIE2000_SP-1	S005WTS041	SP-1	Riebe	2000	10.1130/0091-7613(2000)28<803:EEADIT>2.0.CO;2	288349	21881.6	2167000	123000	7.51519	0.0947651	46.7	3.57	4.52	42.8	2.46	4.47	1.09112	0.0956424	0.142392	0	0	35.7928	-118.587	35.7942	-118.59	766.84	0.0956268	2312.79	2316.65	2244	2280.32	39.2297	28.0839	32.0902	33.1346	675.884	20.4558	742.244	4190.57	NaN	25.7727	Active	Acid Plutonic Rocks	1	0	0	0	0
RIE2000_SP-19	S005WTS047	SP-19	Riebe	2000	10.1130/0091-7613(2000)28<803:EEADIT>2.0.CO;2	1.43497e+06	80654.6	9758000	581000	6.80016	0.0818798	9.68	0.561	0.814	9.53	0.603	1.06	1.01574	0.0858039	0.139438	0	0	35.7852	-118.583	35.788	-118.579	763.97	0.105231	2341.89	2366.02	2313.12	2339.57	41.8866	25.3104	10.1882	25.7951	658	15	740.801	4186.04	NaN	25.7727	Active	Acid Plutonic Rocks	1	0	0	0	0
RIE2000_SP-3	S005WTS042	SP-3	Riebe	2000	10.1130/0091-7613(2000)28<803:EEADIT>2.0.CO;2	457796	24865.5	2673000	151000	5.83884	0.0783671	30.3	1.66	2.45	35.5	2.04	3.71	0.853521	0.0793955	0.132135	1	0	35.7963	-118.585	35.7987	-118.584	763.69	0.060719	2343.06	2290.19	2240.92	2265.55	24.1769	25.0252	25.4191	24.8737	672.79	36.4932	742	4189	NaN	25.7727	Active	Acid Plutonic Rocks	1	0	0	0	0
RIE2000_SP-4	S005WTS043	SP-4	Riebe	2000	10.1130/0091-7613(2000)28<803:EEADIT>2.0.CO;2	151454	10940.8	1224000	78000	8.08169	0.0963296	84.4	6.12	7.9	72.7	4.67	7.84	1.16094	0.0968726	0.142797	2	0	35.8157	-118.575	35.8158	-118.574	771.17	0.0183055	2268.66	2220.35	2158.55	2189.45	15.6545	25.8335	24.4535	21.9805	644.319	22.3755	733.854	4188.98	NaN	20.5614	Active	Acid Plutonic Rocks	1	0	0	0	0
RIE2000_SP-8	S005WTS045	SP-8	Riebe	2000	10.1130/0091-7613(2000)28<803:EEADIT>2.0.CO;2	548216	33726.7	3417000	190000	6.23294	0.0829255	26.6	1.66	2.29	29.2	1.65	3.05	0.910959	0.0841875	0.135358	1	0	35.7828	-118.592	35.7834	-118.592	756.69	0.024007	2422.14	2394.6	2254	2324.3	11.264	21.0864	36.0283	22.7929	740.135	18.3976	747.696	4187.84	NaN	25.7727	Active	Acid Plutonic Rocks	1	0	0	0	0
RIE2000_SP-9	S005WTS046	SP-9	Riebe	2000	10.1130/0091-7613(2000)28<803:EEADIT>2.0.CO;2	357702	20525.3	2440000	136000	6.82133	0.0799956	36.2	2.09	3	36.5	2.06	3.8	0.991781	0.0807378	0.133067	0	0	35.7817	-118.602	35.783	-118.602	772.98	0.0384109	2249.42	2230.77	2073.17	2151.97	18.6304	37.1651	54.2916	36.6957	821.346	11.8306	734.216	4046.37	NaN	24.2254	Active	Acid Plutonic Rocks	1	0	0	0	0
SAF2005_BOL-01	S025WTS001	BOL-01	Safran	2005	10.1002/esp.1259	30686.2	1815.24	196400	150800	6.40027	0.770096	707	41.8	59.1	742	570	573	0.95283	0.770466	0.776748	0	0	-15.8609	-68.5928	-15.7928	-68.6384	595.8	132.547	4339.93	4344.79	4340.65	4342.72	41.3637	53.7868	64.4293	53.1933	1202.27	421.064	841.7	6597.57	0.361405	26.4016	Active	Mixed Sedimentary Rocks	2	104.956	79.1844	21.6	16.3
SAF2005_BOL-07	S025WTS006	BOL-07	Safran	2005	10.1002/esp.1259	82978.8	2793.9	466600	31500	5.62312	0.0754402	171	5.76	11.6	204	13.8	22.4	0.838235	0.0755695	0.129068	1	1	-15.6109	-68.7737	-15.3876	-68.5208	672.33	2933.14	3340.88	3339.09	3339.5	3339.3	42.9674	50.5977	54.3652	49.3101	1091.89	338.041	913.856	6479.76	0.335054	24.9662	Active	Mixed Sedimentary Rocks	3	245.863	8.38225	24.8	0.85
SAF2005_BOL-13	S025WTS011	BOL-13	Safran	2005	10.1002/esp.1259	83072	3073.29	478300	44600	5.75766	0.100318	161	5.98	11.3	189	17.6	24	0.851852	0.100256	0.14509	1	0	-15.5966	-68.7431	-15.2971	-68.276	682.12	3231.28	3188.17	3185.59	3184.21	3184.9	44.0836	51.0891	54.4299	49.8675	1097.59	335.115	944.362	6677.07	0.320575	24.8176	Active	Mixed Sedimentary Rocks	3	245.863	7.60885	24.8	0.77
SAF2005_BOL-19	S025WTS017	BOL-19	Safran	2005	10.1002/esp.1259	54574.2	2980.16	290200	37600	5.31753	0.140603	241	13.2	19.4	305	39.6	47.6	0.790164	0.140916	0.175603	1	0	-15.7111	-68.3087	-15.5026	-67.886	680.97	1537.42	2981.28	2977.88	2978.87	2978.38	47.0653	48.0835	49.1486	48.0991	1043.46	334.667	1051.39	7633.44	0.303675	20.7364	Active	Mixed Sedimentary Rocks	2	302.335	19.6651	54.4	3.54
SAF2005_BOL-24	S025WTS022	BOL-24	Safran	2005	10.1002/esp.1259	30081	2421.38	125200	21400	4.1621	0.188932	194	15.6	19.3	321	54.9	61.5	0.604361	0.188989	0.215878	1	1	-16.0965	-67.5276	-16.0013	-67.5875	818.13	153.883	1816.45	1818.55	1823.52	1821.03	41.8444	37.0929	34.5479	37.8284	776.708	177.03	1352.49	8893.91	0.263116	48.7495	Active	Mixed Sedimentary Rocks	1	0	0	0	0
SAF2005_BOL-25	S025WTS023	BOL-25	Safran	2005	10.1002/esp.1259	49638.3	3166.42	271100	42300	5.46151	0.168567	128	8.19	11.2	161	25.2	28.7	0.795031	0.169095	0.198578	1	0	-16.1128	-67.6042	-16.0407	-67.6268	807.98	145.573	1906.16	1906.82	1898.1	1902.46	51.1173	50.0536	48.5639	49.9116	1021.01	176.278	1297.5	8677.78	0.305756	38.2715	Active	Mixed Sedimentary Rocks	1	0	0	0	0
SAF2005_BOL-27	S025WTS025	BOL-27	Safran	2005	10.1002/esp.1259	63421.5	2887.03	352800	38600	5.56278	0.118502	358	16.3	26.7	430	47.1	59.9	0.832558	0.118621	0.158011	1	0	-16.2189	-68.1527	-16.1572	-68.1207	588.11	150.712	4505.58	4527.66	4539.12	4533.39	52.6636	52.0487	48.6697	51.1273	1081.54	262.258	769.6	6040.29	0.386227	16.0894	Active	Mixed Sedimentary Rocks	2	150.712	100	13.9	9.24
SAF2005_BOL-32	S025WTS030	BOL-32	Safran	2005	10.1002/esp.1259	124794	4004.59	467000	45600	3.74216	0.102782	153	4.92	10.3	264	25.8	34.4	0.579545	0.102882	0.146666	1	1	-17.1099	-67.498	-17.0593	-67.6585	627.84	836.627	3992.6	3991.2	3994.16	3992.68	33.5579	33.6372	32.889	33.3614	692.499	254.771	528.957	3657.87	0.463649	32.7443	Active	Mixed Sedimentary Rocks	3	0	0	10.7	1.28
SAF2005_BOL-50	S025WTS056	BOL-50	Safran	2005	10.1002/esp.1259	20023	1117.56	122300	13900	6.10799	0.12662	423	23.6	34.4	479	54.5	68.4	0.88309	0.126721	0.164331	0	0	-15.8434	-67.6634	-13.9821	-67.5062	750.95	70543.7	2153.18	2152.02	2151.74	2151.88	36.9017	37.9535	38.5956	37.8169	803.67	390.244	1297.12	8785.29	0.224004	27.1318	Active	Mixed Sedimentary Rocks	5	2395.13	3.39524	372.2	0.53
SCH2016_CH-065	S182WTS041	CH-065	Schmidt	2016	10.5194/esurf-4-819-2016	135000	4200	862053	30600.4	6.38558	0.0472011	45.2	1.41	3.03	48.8	1.75	4.59	0.92623	0.0475299	0.115501	1	0	21.8596	100.549	21.8521	100.547	835.51	56.0954	1627.92	1626.4	1632.55	1629.48	19.8892	19.1138	19.3967	19.4666	409.451	119.744	1546.49	10532.2	0.126257	63.2556	Active	Acid Plutonic Rocks	1	0	0	0	0
SCH2016_CH-066	S182WTS042	CH-066	Schmidt	2016	10.5194/esurf-4-819-2016	209000	4440	1.23392e+06	37715.9	5.90393	0.0372234	31.4	0.674	1.99	36.4	1.13	3.38	0.862637	0.0377422	0.112423	1	1	21.8252	100.567	21.8479	100.558	825.99	14.7868	1723.28	1722.21	1718.53	1720.37	21.6168	21.1166	20.2156	20.983	435.923	82.0257	1538	10567.7	0.096432	63.673	Active	Acid Plutonic Rocks	1	0	0	0	0
SCH2016_CH-070	S182WTS046	CH-070	Schmidt	2016	10.5194/esurf-4-819-2016	119000	5170	821090	31643.4	6.89991	0.058075	48.7	2.13	3.59	48.9	1.91	4.66	0.99591	0.0586393	0.120481	0	0	21.7555	100.362	21.7938	100.366	842.7	32.11	1554.45	1559.52	1548.24	1553.88	21.8886	19.6012	20.3349	20.6082	426.647	87.1	1531.2	10276.6	0.0690184	37.867	Active	Acid Plutonic Rocks	2	0	0	0	0
SCH2016_CH-079	S182WTS051	CH-079	Schmidt	2016	10.5194/esurf-4-819-2016	176000	8610	1.21519e+06	50929.5	6.90447	0.0644184	34	1.68	2.63	33.9	1.45	3.3	1.00295	0.0653532	0.124336	0	0	21.9513	100.17	21.9587	100.18	840.39	11.9466	1575.23	1570.96	1586.5	1578.73	28.724	35.3487	43.0356	35.7028	633.195	55.2247	1519.62	10179.3	0.129308	38.4224	Active	Metamorphic Rocks	3	0	0	0	0
SCH2016_CH-080	S182WTS052	CH-080	Schmidt	2016	10.5194/esurf-4-819-2016	190000	4700	1.17257e+06	38433.5	6.17142	0.041064	33.8	0.843	2.18	37.5	1.25	3.51	0.901333	0.0416312	0.11367	1	1	21.8748	100.177	21.8846	100.223	829.3	51.3082	1683.28	1683.01	1684.69	1683.85	28.3893	26.5279	24.3652	26.4275	558.546	92.5856	1512.79	10298.8	0.115713	35.1867	Active	Metamorphic Rocks	2	0	0	0	0
SCH2025_O103o	S407WTS016	O103o	Schmidt	2025	Namibia - Not published	568980	14802.9	3858607	111812	6.78163	0.0389429	8.34	0.225	0.557	8.21	0.255	0.799	1.01583	0.0411405	0.118033	0	0	-21.3234	15.7298	-21.5871	14.9554	874.886	8620.14	1251.76	1249.25	1249.14	1249.2	6.71879	4.65215	4.89447	5.4218	111.099	128.736	268.34	1094.38	0.961303	0	Post-Orogenic	Acid Plutonic Rocks	6	0	0	0	0
SCH2025_O103oo	S407WTS017	O103oo	Schmidt	2025	Namibia - Not published	1.02381e+06	28525.4	5495091	148985	5.3673	0.0388764	3.78	0.114	0.266	4.68	0.143	0.476	0.807692	0.0429324	0.12368	1	1	-21.6989	15.1999	-21.5901	14.9551	898.62	877.792	1032.34	1028.76	1028.32	1028.54	4.70109	2.77964	3.31996	3.60023	72.203	62.03	167.48	673.74	0.949979	0	Post-Orogenic	Metamorphic Rocks	4	0	0	0	0
SCH2025_O176g	S407WTS022	O176g	Schmidt	2025	Namibia - Not published	755852	15143.5	5653884	148693	7.48015	0.0330614	6.1	0.128	0.399	5.31	0.155	0.531	1.14878	0.0359497	0.119492	2	2	-21.5067	15.4895	-21.3597	15.4291	877.676	571.072	1228.45	1224.17	1223.97	1224.07	10.359	9.51049	9.13489	9.66814	215.35	209.386	230.348	929.362	0.948527	0	Post-Orogenic	Metamorphic Rocks	5	0	0	0	0
SCH2025_O176o	S407WTS023	O176o	Schmidt	2025	Namibia - Not published	487886	10236.7	3420772	94816	7.01141	0.0347636	10.5	0.227	0.678	10.1	0.296	0.965	1.0396	0.0364181	0.115318	2	0	-21.3221	15.9737	-21.3546	15.4349	863.952	5507.77	1368.34	1366.19	1366.24	1366.21	7.22767	4.95983	5.13669	5.77473	119.632	135.979	309.941	1268.35	0.967482	0	Post-Orogenic	Acid Plutonic Rocks	5	0	0	0	0
SCH2025_O195ok	S407WTS025	O195ok	Schmidt	2025	Namibia - Not published	544813	14435.7	3490607	109482	6.40698	0.0410587	9.25	0.253	0.618	9.71	0.323	0.943	0.952626	0.0430655	0.117878	1	0	-21.2041	15.8676	-21.3494	15.6947	866.051	543.716	1351.56	1350.88	1350.35	1350.62	7.76316	5.49474	5.36368	6.2072	141.763	125.663	310.881	1270.63	0.962272	0	Post-Orogenic	Metamorphic Rocks	4	0	0	0	0
SCH2025_O27o	S407WTS028	O27o	Schmidt	2025	Namibia - Not published	632750	22791.6	4248972	141585	6.71509	0.0490694	7.02	0.264	0.506	6.94	0.251	0.695	1.01153	0.052176	0.123387	0	0	-21.4428	15.5587	-21.9452	14.4134	883.912	11398.5	1154.33	1151.92	1152.15	1152.04	6.28283	4.36795	4.72854	5.12644	104.582	117.761	234.454	956.02	0.952289	0	Post-Orogenic	Acid Plutonic Rocks	6	0	0	0	0
SCH2025_S216	S407WTS033	S216	Schmidt	2025	Namibia - Not published	552134	15794.8	3808639	105477	6.89804	0.039816	10.1	0.298	0.683	9.84	0.289	0.943	1.02642	0.0416309	0.11729	0	0	-22.2524	16.7772	-22.3687	16.1218	852.946	12565.8	1478.88	1478.49	1478	1478.25	9.03905	5.75855	6.03439	6.944	137.803	98.1009	322.979	1300.28	0.963016	0	Post-Orogenic	Metamorphic Rocks	6	0	0	0	0
SCH2025_S216o	S407WTS034	S216o	Schmidt	2025	Namibia - Not published	627387	21587.7	3689626	102477	5.88094	0.0442198	7.72	0.276	0.548	8.83	0.262	0.852	0.874292	0.0464603	0.119787	1	1	-22.1008	16.2479	-22.3556	16.1343	872.791	1199.48	1288.75	1287.8	1288.28	1288.04	7.57296	5.35784	5.45406	6.12828	133.19	100.09	256.235	1030.89	0.962086	0	Post-Orogenic	Acid Plutonic Rocks	4	0	0	0	0
SCH2025_S231o	S407WTS036	S231o	Schmidt	2025	Namibia - Not published	502890	17173.4	3112826	101240	6.18988	0.0471589	9.93	0.349	0.697	10.8	0.372	1.05	0.919444	0.0492104	0.119912	1	0	-22.1159	16.3396	-22.168	16.2901	869.331	90.8326	1323.28	1327.16	1325.77	1326.46	4.81199	3.17616	3.56736	3.85184	80.7788	44.9598	266.895	1076.8	0.950683	0	Post-Orogenic	Acid Plutonic Rocks	4	0	0	0	0
SCH2025_S417S	S407WTS046	S417S	Schmidt	2025	Namibia - Not published	490991	20306	3322890	95264	6.76772	0.0503222	13.9	0.588	1.02	13.9	0.415	1.31	1	0.051777	0.119444	0	0	-22.1357	17.298	-22.0402	17.3733	822.819	193.195	1796.14	1796.16	1795.72	1795.94	6.79932	4.19556	4.75415	5.24968	98.2545	34.4346	423.336	1728.3	0.967967	0	Post-Orogenic	Metamorphic Rocks	1	0	0	0	0
SCH2025_S44	S407WTS047	S44	Schmidt	2025	Namibia - Not published	679674	17297.2	4025632	96221	5.92288	0.0349138	7.06	0.187	0.473	7.99	0.205	0.766	0.883605	0.0368763	0.11696	1	1	-22.1544	16.1962	-22.6946	14.8885	873.838	28419.5	1248.53	1246.66	1246.23	1246.45	8.84442	6.05207	6.48941	7.12863	145.558	121.501	245.03	986.8	0.948816	0	Post-Orogenic	Metamorphic Rocks	9	0	0	0	0
SCH2025_S44k	S407WTS048	S44k	Schmidt	2025	Namibia - Not published	352708	11169.6	2146056	67389	6.08452	0.0445973	12.8	0.415	0.879	14.4	0.47	1.37	0.888889	0.0460052	0.117334	1	1	-22.0347	15.8199	-22.6902	14.9095	884.625	8086.7	1159.23	1156.42	1156.08	1156.25	7.38248	5.17076	5.79398	6.11574	124.037	146.372	221.042	888.442	0.94825	0	Post-Orogenic	Acid Plutonic Rocks	7	0	0	0	0
SCH2025_S44lc	S407WTS049	S44lc	Schmidt	2025	Namibia - Not published	265052	8951.6	1807767	68113	6.82041	0.0505988	9.13	0.319	0.641	9.01	0.362	0.902	1.01332	0.053245	0.122276	0	0	-22.6707	14.8951	-22.6924	14.8928	980.171	5.76009	289.942	285.96	281.333	283.647	9.34264	5.31901	5.94437	6.86867	133.506	13.4942	30.3333	135.556	0.88625	0	Post-Orogenic	Metamorphic Rocks	1	0	0	0	0
SCH2025_S44S	S407WTS050	S44S	Schmidt	2025	Namibia - Not published	634889	26669.6	3954549	129040	6.22873	0.0531915	7.79	0.34	0.586	8.39	0.293	0.826	0.928486	0.0558975	0.1239	1	0	-22.3053	16.3461	-22.6927	14.9063	870.053	20322.3	1284.56	1283.09	1282.69	1282.89	9.42492	6.40297	6.76717	7.53168	154.131	108.906	254.68	1026.35	0.949069	0	Post-Orogenic	Metamorphic Rocks	8	0	0	0	0
SOS2016_BRA03	S133WTS006	BRA03	Sosa-Gonzalez	2016	10.1016/j.geomorph.2016.04.025	62000	3000	440118	20270.8	7.09868	0.0668029	91.4	4.44	7	89.9	4.17	8.83	1.01669	0.0671666	0.12455	0	0	-22.4631	-43.0122	-22.4684	-42.9992	841.07	2.75437	1514.04	1523.9	1469	1496.45	50.7422	69.2267	72.9166	64.2952	1349.02	171.598	1781	15951.3	NaN	0	Post-Orogenic	Acid Plutonic Rocks	1	0	0	0	0
SOS2016_BRA21	S133WTS009	BRA21	Sosa-Gonzalez	2016	10.1016/j.geomorph.2016.04.025	241000	5000	1.41643e+06	55782.1	5.87731	0.0445127	9.48	0.203	0.612	11	0.458	1.1	0.861818	0.0468201	0.119028	1	1	-21.3972	-41.9658	-21.33	-41.88	987.45	209.474	234.48	233.504	232.903	233.204	22.3951	14.3863	11.6938	16.1584	321.219	176.988	1217.44	9147.11	0.159254	0	Post-Orogenic	Metamorphic Rocks	2	0	0	0	0
SOS2016_BRA47	S133WTS017	BRA47	Sosa-Gonzalez	2016	10.1016/j.geomorph.2016.04.025	238000	5000	1.61523e+06	57212	6.7867	0.0411819	14.8	0.318	0.949	15	0.551	1.45	0.986667	0.0425559	0.116	0	0	-27.5836	-49.4814	-27.3301	-49.6208	934	1839.15	694.73	694.207	694.668	694.438	18.2531	16.647	15.3196	16.7399	335.227	142.879	1621.37	14728.5	0.0848839	0	Post-Orogenic	Siliciclastic Sedimentary Rocks	3	0	0	0	0
SOS2016_C_NATA	S149WTS004	C_NATA	Sosa-Gonzalez	2016	10.1016/j.geomorph.2016.04.025	137000	2600	206268	27397.6	1.50561	0.134174	19.8	0.381	1.24	93.3	12.5	14.9	0.212219	0.135351	0.17154	1	1	8.4339	-80.7162	8.32753	-80.5191	954.16	362.208	444.43	439.59	439.262	439.426	18.5858	18.0914	18.763	18.4801	391.162	283.716	2460.03	14990.6	0.227326	0	Post-Orogenic	Intermediate Volcanic Rocks	2	0	0	0	0
SOS2016_CAIM	S149WTS005	CAIM	Sosa-Gonzalez	2016	10.1016/j.geomorph.2016.04.025	95400	1800	796157	28098.2	8.34547	0.0400192	22.8	0.436	1.43	18.6	0.678	1.79	1.22581	0.0411631	0.11487	2	2	8.858	-79.8832	8.91168	-79.7442	992.79	314.511	150.17	150.741	148.322	149.531	8.68395	5.51563	4.52856	6.24271	126.485	68.4002	2416.26	14114.1	0.401341	0	Post-Orogenic	Acid Volcanic Rocks	1	0	0	0	0
SOS2016_CHAN	S149WTS008	CHAN	Sosa-Gonzalez	2016	10.1016/j.geomorph.2016.04.025	39400	1200	146819	15955.2	3.72637	0.11286	113	3.44	7.5	208	22.7	28.9	0.543269	0.113301	0.153981	1	1	9.0923	-82.5767	9.36751	-82.5317	865.62	1806.34	1180.32	1183.22	1175.72	1179.47	31.8474	31.0501	31.5361	31.4778	660.991	196.082	3250.3	25552.1	0.159004	201.655	Active	Acid Volcanic Rocks	4	0	0	0	0
SOS2016_CHIVE_H	S149WTS009	CHVIE_H	Sosa-Gonzalez	2016	10.1016/j.geomorph.2016.04.025	36100	1300	272665	23511	7.55305	0.0934443	208	7.48	14.4	191	16.6	23.4	1.08901	0.0940572	0.140721	0	0	8.8686	-82.5788	8.85139	-82.5983	771.53	71.0845	2271.18	2271.72	2266.07	2268.89	29.2531	32.1671	34.2158	31.8787	703.963	172.869	2735.81	26716.7	0.134853	236.008	Active	Acid Volcanic Rocks	1	0	0	0	0
SOS2016_CUL	S149WTS013	CUL	Sosa-Gonzalez	2016	10.1016/j.geomorph.2016.04.025	13100	1000	101711	17066	7.7642	0.184337	176	13.5	17	164	27.5	31	1.07317	0.184394	0.212273	0	0	9.4708	-79.2536	9.515	-79.2484	982.9	35.6189	234.31	234.945	244.629	239.787	19.9798	14.4737	14.5767	16.3434	305.933	69.6942	3061.98	18845.5	0.25285	0	Post-Orogenic	Basic Volcanic Rocks	1	0	0	0	0
SOS2016_GLOR	S149WTS015	GLOR	Sosa-Gonzalez	2016	10.1016/j.geomorph.2016.04.025	35400	1500	164727	17359.1	4.65329	0.113581	82.8	3.52	6.04	125	13.2	17.1	0.6624	0.113836	0.155034	1	1	8.9529	-82.2512	8.98452	-82.2325	941.29	24.6469	594.41	615.17	562.76	588.965	30.3168	30.4282	31.5705	30.7718	650.957	113.538	3108.37	20782.8	0.178703	0	Post-Orogenic	Acid Volcanic Rocks	3	0	0	0	0
SOS2016_IND	S149WTS019	IND	Sosa-Gonzalez	2016	10.1016/j.geomorph.2016.04.025	66400	1800	416228	20397.4	6.2685	0.0560034	36.3	0.992	2.38	40.7	2.02	4.09	0.891892	0.0566577	0.119989	1	0	8.8034	-80.1492	8.98827	-80.1725	976.92	373.688	275.45	276.066	274.775	275.42	14.9041	10.8574	9.26994	11.6772	227.731	131.923	2855.21	17121.3	0.267003	0	Post-Orogenic	Acid Volcanic Rocks	3	0	0	0	0
SOS2016_PACORA	S149WTS023	PACORA	Sosa-Gonzalez	2016	10.1016/j.geomorph.2016.04.025	10900	500	82309.3	9156.09	7.55132	0.120327	225	10.3	16.8	214	23.9	30.2	1.0514	0.1207	0.159657	0	0	9.1967	-79.2833	9.07436	-79.2842	971.81	271.244	313.26	310.516	314.956	312.736	17.1232	16.8273	17.32	17.0902	358.182	184.24	2531.89	15278.2	0.216389	0	Post-Orogenic	Acid Plutonic Rocks	4	0	0	0	0
SOS2016_PAN06	S149WTS025	PAN06	Sosa-Gonzalez	2016	10.1016/j.geomorph.2016.04.025	36100	900	240235	13001.3	6.65471	0.0595853	69.7	1.75	4.49	74.2	4.04	7.59	0.939353	0.0599576	0.120885	1	0	9.2285	-78.4634	9.19587	-78.4767	969.9	25.5904	347.06	344.327	335.538	339.933	18.8213	16.9665	12.2132	16.0003	330.889	57.9173	2433.13	14854	0.245124	0	Post-Orogenic	Basic Volcanic Rocks	2	0	0	0	0
SOS2016_PERE	S149WTS026	PERE	Sosa-Gonzalez	2016	10.1016/j.geomorph.2016.04.025	112400	2100	755128	28980.6	6.71822	0.0426845	19.8	0.376	1.24	20.3	0.803	1.97	0.975369	0.0438788	0.115497	0	0	8.7743	-79.9056	8.82422	-79.8559	987.75	69.7432	190.3	194.064	192.055	193.059	13.0586	12.363	12.0302	12.4839	276.479	182.249	2347.51	13666	0.371969	0	Post-Orogenic	Acid Volcanic Rocks	1	0	0	0	0
SOS2017_CH-119	S214WTS079	CH-119	Sosa-Gonzalez	2017	10.1002/esp.4205	81000	3000	498147	23615.7	6.14996	0.0601595	252	9.36	17.6	276	13.1	27.2	0.913043	0.0602694	0.120789	1	0	27.797	98.0414	21.8712	100.984	640.18	144302	3309.47	3302.82	3303.28	3303.05	34.4802	33.2303	32.0178	33.2428	689.879	306.978	838.799	7148.19	0.288541	21.9122	Active	Mixed Sedimentary Rocks	12	15769.7	10.9283	287.9	0.2
SOS2017_CH-129	S214WTS017	CH-129	Sosa-Gonzalez	2017	10.1002/esp.4205	160000	4000	1.0161e+06	35939.5	6.3506	0.0433134	34.3	0.866	2.22	37.3	1.34	3.52	0.919571	0.0439096	0.114432	1	0	22.1966	99.3724	22.1858	99.2074	853.92	516.018	1408.93	1402.17	1399.56	1400.86	29.5185	28.651	30.3463	29.5053	612.355	177.901	1422.61	9387.07	0.131588	26.6244	Active	Mixed Sedimentary Rocks	5	0	0	0	0
STA2017_1	S199WTS001	1	Starke	2017	10.1002/2016JF004153	640000	22000	4379000	201000	6.84219	0.0573457	14	0.491	0.976	13.7	0.658	1.4	1.0219	0.0594711	0.123705	0	0	-19.477	-69.6705	-19.5513	-70.1933	776.88	4712.57	1975.91	1970.67	1971.88	1971.28	11.1983	11.277	11.9979	11.4911	249.955	208.863	40.356	247.213	0.568426	91.9043	Active	Unconsolidated Sediments	9	0	0	2.7	0.06
STA2017_10	S199WTS006	10	Starke	2017	10.1002/2016JF004153	73000	4000	542000	41000	7.42466	0.0934062	176	9.65	14.2	163	12.3	18.7	1.07975	0.0932765	0.140254	0	0	-18.9628	-69.5322	-19.1578	-70.1878	693.2	2260.7	2928.86	2925.9	2924.8	2925.35	24.3345	26.0416	29.4399	26.6053	565.932	255.854	111.083	696.664	0.538324	78.7079	Active	Pyroclastic	9	0	0	3.7	0.17
STA2017_11	S199WTS008	11	Starke	2017	10.1002/2016JF004153	782000	25000	4925000	191000	6.29795	0.0502599	18.7	0.609	1.28	19.9	0.794	1.93	0.939698	0.0515031	0.118707	1	0	-18.5029	-69.665	-18.5185	-70.1902	699.89	1725.73	2931.88	2925.22	2925.35	2925.28	23.8876	26.9633	31.9811	27.6106	593.669	330.31	122.617	752.183	0.540572	111.081	Active	Acid Volcanic Rocks	7	0	0	2.7	0.15
STA2017_15	S199WTS009	15	Starke	2017	10.1002/2016JF004153	255000	10000	1732000	88000	6.79216	0.0641822	43.2	1.71	3.08	43.3	2.23	4.39	0.997691	0.0649554	0.123944	0	0	-18.7892	-69.7445	-18.7774	-70.2689	737.82	1419.71	2369.47	2362.67	2362.26	2362.47	19.6616	18.6624	20.4709	19.5983	410.803	147.859	77.595	483.16	0.541507	115.009	Active	Pyroclastic	7	0	0	0.5	0.03
STA2017_18	S199WTS010	18	Starke	2017	10.1002/2016JF004153	3221000	100000	21385000	711000	6.63924	0.0454893	6.11	0.199	0.428	5.91	0.216	0.6	1.03384	0.0489546	0.123344	0	0	-18.956	-69.3821	-19.0076	-69.82	659.25	1462.3	3492.59	3489.14	3485.77	3487.46	24.8932	26.2021	29.6676	26.921	580.974	252.901	146.256	926.541	0.537509	69.4486	Active	Acid Volcanic Rocks	7	0	0	3.7	0.26
STA2017_2	S199WTS011	2	Starke	2017	10.1002/2016JF004153	3170000	97000	949000	58000	0.299369	0.0683491	4.06	0.133	0.29	83.9	5.16	8.91	0.0483909	0.0696821	0.127984	1	1	-18.8808	-69.6044	-18.9957	-69.8481	720.13	413.768	2753.03	2738.63	2736.47	2737.55	25.4149	23.8586	26.3554	25.2096	528.946	198.656	87.2667	517.186	0.529499	96.0879	Active	Unconsolidated Sediments	5	0	0	0	0
STA2017_8	S199WTS013	8	Starke	2017	10.1002/2016JF004153	760000	26000	4930000	198000	6.48684	0.0527576	30.3	1.05	2.09	31.1	1.27	3	0.974277	0.0535578	0.118587	0	0	-18.9564	-69.2757	-18.9511	-69.4911	627.68	989.649	3997.37	3991.49	3989.3	3990.39	20.2337	21.6499	24.351	22.0782	490.596	202.949	187.218	1205.01	0.551558	58.1288	Active	Acid Volcanic Rocks	6	0	0	3.7	0.38
STA2017_9	S199WTS016	9	Starke	2017	10.1002/2016JF004153	654000	22000	4498000	183000	6.87768	0.0527905	26.6	0.904	1.83	25.9	1.08	2.52	1.02703	0.0537938	0.119163	0	0	-18.8331	-69.4794	-18.8683	-69.6835	672.05	218.926	3429.1	3420.85	3431.12	3425.99	24.1856	22.1255	22.9747	23.0953	477.103	120.973	138.274	834.389	0.541473	79.1562	Active	Unconsolidated Sediments	4	0	0	0	0
STR2018_ALB1	S208WTS015	ALB1	Struck	2018	10.5194/esurf-6-329-2018	1335000	31000	5584000	383000	4.18277	0.072413	1.75	0.0476	0.13	2.84	0.236	0.378	0.616197	0.0874369	0.152426	1	1	-26.6877	133.387	-27.1401	134.764	966.84	14090.1	418.19	417.978	417.912	417.945	1.71155	1.27714	1.35493	1.44788	29.6065	17.9105	222.759	745.04	0.953602	0	Post-Orogenic	Unconsolidated Sediments	7	0	0	0	0
STR2018_ALB2	S208WTS013	ALB2	Struck	2018	10.5194/esurf-6-329-2018	1404000	34000	5697000	324000	4.05769	0.0618132	1.45	0.0425	0.112	2.44	0.173	0.314	0.594262	0.0767212	0.15009	1	1	-27.1409	134.177	-27.1335	134.437	982.02	1351.31	288.78	288.7	288.236	288.468	2.81497	2.14848	2.08037	2.34794	47.5776	18.9136	212.003	703.563	0.947453	0	Post-Orogenic	Siliciclastic Sedimentary Rocks	2	0	0	0	0
STR2018_ALB3	S208WTS012	ALB3	Struck	2018	10.5194/esurf-6-329-2018	1427000	38000	6348000	353000	4.44849	0.0616553	1.39	0.0451	0.11	2.07	0.148	0.273	0.671498	0.0785153	0.153805	1	1	-27.0621	134.241	-27.1282	134.392	984.33	243.73	268.59	268.67	268.213	268.442	2.55016	1.92539	1.94003	2.13852	46.4526	19.8482	210.211	695.96	0.944194	0	Post-Orogenic	Unconsolidated Sediments	2	0	0	0	0
STR2018_COO	S208WTS011	COO	Struck	2018	10.5194/esurf-6-329-2018	1695000	42000	6868000	481000	4.05192	0.0742892	1.13	0.0354	0.0915	1.88	0.173	0.274	0.601064	0.0972076	0.166728	1	1	-27.2319	134.328	-27.1584	134.376	984.08	238.669	269.89	270.222	270.425	270.323	2.83644	2.28203	2.26733	2.46193	49.787	18.3651	207.121	682.54	0.942279	0	Post-Orogenic	Unconsolidated Sediments	2	0	0	0	0
STR2018_ELL	S208WTS005	ELL	Struck	2018	10.5194/esurf-6-329-2018	461000	17000	2358000	114000	5.11497	0.0608047	7.12	0.274	0.516	9.53	0.489	0.999	0.747114	0.0641392	0.12744	1	1	-23.8466	133	-24.0876	132.84	933.66	1613.19	709.71	709.476	709.243	709.359	7.26739	4.99096	5.08958	5.78264	116.704	90.1011	312.425	1092.57	0.927776	0	Post-Orogenic	Siliciclastic Sedimentary Rocks	7	0	0	0	0
STR2018_FIN1	S208WTS002	FIN1	Struck	2018	10.5194/esurf-6-329-2018	450000	16000	2454000	122000	5.45333	0.0611208	7.8	0.288	0.558	9.76	0.515	1.03	0.79918	0.0644019	0.127495	1	1	-23.5993	132.617	-23.6893	132.677	923.7	1544.6	802.28	801.877	801.955	801.916	9.81342	7.04491	6.88018	7.91284	167.54	120.145	338.29	1185.4	0.914512	0	Post-Orogenic	Acid Plutonic Rocks	7	0	0	0	0
STR2018_FIN2	S208WTS003	FIN2	Struck	2018	10.5194/esurf-6-329-2018	510000	15000	2412000	116000	4.72941	0.0563735	6.64	0.204	0.458	9.65	0.493	1.01	0.688083	0.0596145	0.125348	1	1	-23.7569	132.523	-23.9513	132.774	928.24	4013.01	761.06	760.732	760.838	760.785	7.08616	4.99684	5.06078	5.7146	116.218	95.9754	325.136	1133.17	0.924456	0	Post-Orogenic	Siliciclastic Sedimentary Rocks	7	0	0	0	0
STR2018_FIN3	S208WTS006	FIN3	Struck	2018	10.5194/esurf-6-329-2018	548000	16000	2744000	132000	5.0073	0.0562722	5.84	0.179	0.404	7.96	0.412	0.843	0.733668	0.0601534	0.126497	1	1	-24.0194	132.73	-24.5516	133.238	935.88	8645.29	691.15	690.732	690.78	690.756	7.60629	5.05843	5.00242	5.88905	114.956	87.2601	309.232	1075.97	0.927259	0	Post-Orogenic	Siliciclastic Sedimentary Rocks	7	0	0	0	0
STR2018_FIN4	S208WTS008	FIN4	Struck	2018	10.5194/esurf-6-329-2018	590000	17000	2813000	135000	4.7678	0.0559768	5.11	0.156	0.355	7.34	0.381	0.782	0.696185	0.0602192	0.127189	1	1	-24.2692	132.687	-24.9299	133.64	943.77	20613	617.22	616.745	616.709	616.727	6.20896	4.06777	3.97931	4.75201	91.3094	73.2796	300.837	1039.17	0.939827	0	Post-Orogenic	Unconsolidated Sediments	7	0	0	0	0
STR2018_FIN5	S208WTS010	FIN5	Struck	2018	10.5194/esurf-6-329-2018	582000	16000	2531000	124000	4.3488	0.0561787	5.02	0.146	0.346	7.99	0.421	0.85	0.628285	0.0601846	0.126759	1	1	-24.3298	133.05	-25.2153	134.24	948.24	31697.7	576.13	575.667	575.599	575.633	5.34308	3.58374	3.51179	4.14621	80.5836	70.1271	287.227	990.411	0.938421	0	Post-Orogenic	Unconsolidated Sediments	7	0	0	0	0
STR2018_HUG	S208WTS009	HUG	Struck	2018	10.5194/esurf-6-329-2018	598000	17000	2656000	128000	4.44147	0.0559527	4.84	0.146	0.337	7.53	0.392	0.801	0.642762	0.0601666	0.127136	1	1	-24.2125	133.553	-24.6776	134.059	948.89	6859.45	572.79	572.366	572.022	572.194	4.53567	3.3337	3.28232	3.71723	74.5185	70.2444	282.118	975.234	0.929495	0	Post-Orogenic	Unconsolidated Sediments	6	0	0	0	0
STR2018_MAC	S208WTS016	MAC	Struck	2018	10.5194/esurf-6-329-2018	1612000	38000	4838000	467000	3.00124	0.0993642	1.26	0.0369	0.0994	3.1	0.356	0.478	0.406452	0.118514	0.173203	1	1	-26.6438	134.117	-27.1891	135.725	977.53	39040.8	321.99	321.701	321.611	321.656	1.642	1.1102	1.18293	1.31171	25.6744	17.3564	210.82	698.852	0.945671	0	Post-Orogenic	Unconsolidated Sediments	9	0	0	0	0
STR2018_NEA1	S208WTS021	NEA1	Struck	2018	10.5194/esurf-6-329-2018	1111000	31000	4460000	405000	4.0144	0.0949974	1.79	0.0584	0.137	3.09	0.335	0.461	0.579288	0.113217	0.167677	1	1	-27.4589	134.838	-27.3925	135.265	991.48	963.953	206.62	206.51	206.239	206.374	1.45685	1.07118	1.03812	1.18872	23.2414	10.8192	189.854	622.751	0.946196	0	Post-Orogenic	Mixed Sedimentary Rocks	3	0	0	0	0
STR2018_NEA2	S208WTS023	NEA2	Struck	2018	10.5194/esurf-6-329-2018	700000	17000	3296000	258000	4.70857	0.0819575	3.04	0.0813	0.214	4.42	0.392	0.583	0.687783	0.0926322	0.14951	1	1	-27.8541	134.931	-27.8658	135.123	993.83	173.893	186.9	186.553	186.767	186.66	2.12169	1.41737	1.49306	1.67737	33.9231	15.802	172.93	561.349	0.930778	0	Post-Orogenic	Siliciclastic Sedimentary Rocks	3	0	0	0	0
STR2018_NEA3	S208WTS026	NEA3	Struck	2018	10.5194/esurf-6-329-2018	1246000	29000	4307000	258000	3.45666	0.0642651	1.55	0.0431	0.117	3.21	0.228	0.399	0.482866	0.076277	0.145424	1	1	-27.5497	134.976	-27.6217	135.434	992.31	4408.28	199.06	198.852	198.691	198.772	1.75656	1.2339	1.25736	1.41594	28.1243	13.0691	188.057	616.042	0.937304	0	Post-Orogenic	Mixed Sedimentary Rocks	4	0	0	0	0
STR2018_NEA4	S208WTS027	NEA4	Struck	2018	10.5194/esurf-6-329-2018	282000	7000	1650000	87000	5.85106	0.0582781	7.69	0.198	0.512	8.98	0.505	0.966	0.856347	0.0618502	0.12651	1	1	-27.9084	135.797	-27.8996	135.8	1005.78	0.654726	82.15	83	81.6327	82.3163	4.08016	2.35065	2.13761	2.85614	38	0.774597	175.571	562.739	NaN	0	Post-Orogenic	Metamorphic Rocks	2	0	0	0	0
STR2018_NEA5	S208WTS029	NEA5	Struck	2018	10.5194/esurf-6-329-2018	774000	20000	3400000	164000	4.39276	0.0547205	2.67	0.0767	0.191	4.19	0.231	0.472	0.637232	0.0621665	0.133444	1	1	-28.0337	135.038	-28.1125	136.294	996.25	27344	166.05	165.808	165.769	165.788	1.83429	1.2407	1.29762	1.45753	27.9046	17.6172	179.36	584.713	0.915343	0	Post-Orogenic	Unconsolidated Sediments	8	0	0	0	0
STR2018_NIL	S208WTS024	NIL	Struck	2018	10.5194/esurf-6-329-2018	496000	19000	3005000	149000	6.05847	0.0626575	5.26	0.213	0.391	5.8	0.317	0.635	0.906897	0.0680219	0.132333	1	0	-28.483	136.009	-28.4829	136	974.55	1.26341	367.21	355.5	358.664	357.082	11.455	10.6696	11.1144	11.0797	159.286	11.3647	191	639.5	NaN	0	Post-Orogenic	Mixed Sedimentary Rocks	1	0	0	0	0
STR2018_OLA	S208WTS014	OLA	Struck	2018	10.5194/esurf-6-329-2018	4200000	95000	6183000	439000	1.47214	0.074517	0.269	0.0129	0.0362	2.16	0.195	0.307	0.124537	0.102224	0.195731	1	1	-27.2958	134.39	-27.1628	134.621	984.26	793.172	268.01	267.87	267.979	267.924	2.58799	1.96103	2.00767	2.18556	42.6402	16.9269	204.289	676.243	0.947723	0	Post-Orogenic	Siliciclastic Sedimentary Rocks	2	0	0	0	0
STR2018_PAL	S208WTS007	PAL	Struck	2018	10.5194/esurf-6-329-2018	606000	17000	3149000	151000	5.19637	0.0555547	5.04	0.15	0.349	6.58	0.344	0.707	0.765957	0.0601576	0.127827	1	1	-24.2884	132.27	-24.7527	133.178	941.62	7243.93	638.38	637.789	637.746	637.767	7.09431	4.59558	4.40801	5.36597	99.4451	55.4669	313.166	1081.69	0.9486	0	Post-Orogenic	Siliciclastic Sedimentary Rocks	4	0	0	0	0
STR2018_PEA1	S208WTS017	PEA1	Struck	2018	10.5194/esurf-6-329-2018	3105000	72000	11292000	724000	3.63671	0.0681806	0.533	0.0194	0.053	1	0.102	0.172	0.533	0.1083	0.198675	1	1	-27.3263	133.972	-27.3475	133.97	974.41	8.32683	354.51	354.514	353.25	353.882	1.58574	1.61249	1.38675	1.52833	30.5769	4.25507	222	742.818	NaN	0	Post-Orogenic	Unconsolidated Sediments	1	0	0	0	0
STR2018_PEA2	S208WTS018	PEA2	Struck	2018	10.5194/esurf-6-329-2018	4172000	105000	15885000	958000	3.80753	0.0653493	0.285	0.0148	0.0377	0.482	0.0649	0.114	0.591286	0.144314	0.270993	1	1	-27.9577	134.081	-27.944	134.153	983	173.499	281.33	281.126	280.891	281.008	1.03027	0.530105	0.577578	0.71265	12.7656	5.15227	195.554	642.706	0.863269	0	Post-Orogenic	Unconsolidated Sediments	3	0	0	0	0
STR2018_PEA4	S208WTS019	PEA4	Struck	2018	10.5194/esurf-6-329-2018	4250000	98000	14471000	779000	3.40494	0.0585625	0.265	0.0131	0.036	0.57	0.0627	0.119	0.464912	0.120597	0.24908	1	1	-28.2331	134.286	-28.2075	134.482	985.64	461.241	258.92	258.993	258.695	258.844	1.81281	1.17817	1.16881	1.3866	25.4949	13.4545	183.14	602.692	0.880377	0	Post-Orogenic	Unconsolidated Sediments	3	0	0	0	0
STR2018_PEA5	S208WTS020	PEA5	Struck	2018	10.5194/esurf-6-329-2018	3261000	77000	11006000	772000	3.37504	0.0740112	0.43	0.0173	0.0466	0.92	0.106	0.169	0.467391	0.12204	0.213281	1	1	-28.025	134.315	-28.2035	134.66	986.96	1413.59	247.72	247.5	247.339	247.419	1.88134	1.36347	1.37381	1.53954	30.7204	15.7461	182.871	603.068	0.895807	0	Post-Orogenic	Unconsolidated Sediments	3	0	0	0	0
STR2018_PEA6	S208WTS022	PEA6	Struck	2018	10.5194/esurf-6-329-2018	3134000	71000	10287000	643000	3.28239	0.0664849	0.448	0.017	0.0475	1	0.0998	0.17	0.448	0.106771	0.200354	1	1	-28.2387	134.417	-28.3303	134.934	989.49	4184.62	225.73	225.577	225.369	225.473	1.73712	1.25475	1.28525	1.42571	28.3136	15.2163	177.587	584.185	0.896232	0	Post-Orogenic	Unconsolidated Sediments	3	0	0	0	0
STR2018_PEA7	S208WTS025	PEA7	Struck	2018	10.5194/esurf-6-329-2018	1523000	37000	5662000	327000	3.71766	0.0626551	1.27	0.0382	0.1	2.38	0.172	0.309	0.533613	0.0782785	0.151843	1	1	-27.7182	134.375	-28.1175	135.086	986.99	4290.3	245.53	245.271	245.384	245.327	2.50312	1.81108	1.8433	2.0525	39.2351	18.8208	187.98	620.672	0.932379	0	Post-Orogenic	Unconsolidated Sediments	3	0	0	0	0
STR2018_PEA8	S208WTS028	PEA8	Struck	2018	10.5194/esurf-6-329-2018	799000	20000	3671000	179000	4.59449	0.0548102	2.61	0.0728	0.186	3.87	0.218	0.442	0.674419	0.0628582	0.134622	1	1	-28.0336	134.875	-28.0345	135.798	994.52	17518.7	177.15	176.947	176.959	176.953	1.7852	1.22135	1.27368	1.42674	27.1952	17.232	179.327	585.344	0.911755	0	Post-Orogenic	Unconsolidated Sediments	7	0	0	0	0
STR2018_PIO	S208WTS001	PIO	Struck	2018	10.5194/esurf-6-329-2018	495000	15000	2786000	140000	5.62828	0.058681	6.93	0.219	0.48	8.35	0.449	0.891	0.82994	0.062371	0.127216	1	1	-23.7164	132.824	-23.6779	132.714	926.47	98.0852	776.81	776.787	775.23	776.009	12.08	7.52997	7.01631	8.87544	171.932	82.0741	336.794	1190.55	0.90777	0	Post-Orogenic	Mixed Sedimentary Rocks	5	0	0	0	0
VAN2003_AK124A	S016WTS004	AK124A	Vance	2003	10.1016/S0012-821X(02)01102-0	17883	2007.28	137923	44756.6	7.71253	0.343368	1300	146	165	1160	375	388	1.12069	0.342228	0.357754	0	0	30.8052	78.7758	30.1458	78.5993	625.61	7638.09	3501.13	3495.06	3496.8	3495.93	48.8309	53.2694	54.303	52.1344	1170.58	329.428	1276.58	10341.2	0.196687	64.5924	Active	Metamorphic Rocks	6	3527.16	46.1785	1068.5	13.99
VAN2003_AK126	S016WTS003	AK126	Vance	2003	10.1016/S0012-821X(02)01102-0	10401.4	1368.6	130616	25575.2	12.5576	0.235907	2030	267	293	1150	225	246	1.76522	0.235752	0.258053	2	2	30.5354	79.5165	30.2295	78.7728	634.32	10583.9	3457.43	3463.62	3463.49	3463.56	52.776	56.3556	60.0758	56.4025	1334.86	402.879	1360.37	11452.1	0.167893	95.3068	Active	Metamorphic Rocks	6	4495.94	42.4789	1424.7	13.46
VAN2003_AK43	S016WTS005	AK43	Vance	2003	10.1016/S0012-821X(02)01102-0	17426.8	1824.8	88234.4	14614.4	5.06313	0.195955	1150	121	138	1510	250	282	0.761589	0.196168	0.221985	1	0	30.6103	79.1336	30.1218	78.313	650.4	21697.9	3146.82	3147.33	3148.19	3147.76	49.7381	52.4596	54.223	52.1402	1191.15	395.93	1388.57	10957.6	0.185501	82.9702	Active	Metamorphic Rocks	6	8023.09	36.9763	2493.2	11.49
VAN2003_AK82	S016WTS002	AK82	Vance	2003	10.1016/S0012-821X(02)01102-0	10401.4	1186.12	70240.5	10412.8	6.75301	0.187031	3050	348	392	3020	448	518	1.00993	0.187148	0.214333	0	0	30.6735	79.7292	30.524	79.5033	564.12	4640.64	4646.28	4641.49	4641.67	4641.58	53.8579	57.3846	62.3255	57.856	1442.37	419.304	1034.82	10376.5	0.220505	68.9772	Active	Metamorphic Rocks	6	3707.47	79.8915	1212	26.12
VAN2003_AK95	S016WTS001	AK95	Vance	2003	10.1016/S0012-821X(02)01102-0	23813.6	2463.48	167152	27402	7.01918	0.193845	1500	155	178	1430	234	264	1.04895	0.193532	0.219464	0	0	30.7815	79.9066	30.6559	79.832	555.1	1676.03	4858.44	4873.83	4876.03	4874.93	51.8711	56.5828	58.4498	55.6345	1311.1	368.761	861.332	8813.36	0.253645	45.3211	Active	Mixed Sedimentary Rocks	6	1397.12	83.3587	357.6	21.34
VAN2022_TG-1	S299WTS001	TG-1	VanLandingham	2022	10.5194/gchron-4-153-2022	364000	6520	2.29873e+06	100667	6.31521	0.047314	9.81	0.181	0.624	10.7	0.494	1.09	0.916822	0.0497185	0.120097	1	0	-41.28	148.025	-41.2896	148.223	970.99	396.294	349.01	346.593	346.17	346.381	18.1104	16.8926	16.5139	17.1723	353.458	132.696	1093.23	10023.4	0.148904	0	Post-Orogenic	Acid Plutonic Rocks	5	0	0	0	0
VAN2022_TG-3	S299WTS003	TG-3	VanLandingham	2022	10.5194/gchron-4-153-2022	397494	11660	2.40032e+06	61657.4	6.03863	0.0389911	8.27	0.251	0.565	9.41	0.257	0.898	0.878852	0.0408298	0.117365	1	1	-41.3211	148.077	-41.2832	148.13	981.4	55.0725	268.73	264.372	268.414	266.393	18.4294	15.301	12.5642	15.4315	316.175	87.3364	1054.66	9435.81	0.214671	0	Post-Orogenic	Acid Plutonic Rocks	3	0	0	0	0
VAN2022_TG-9	S299WTS009	TG-9	VanLandingham	2022	10.5194/gchron-4-153-2022	411000	9920	2.39499e+06	96982.3	5.82723	0.0471414	8.52	0.213	0.562	10.1	0.433	1.02	0.843564	0.0496281	0.120624	1	1	-41.2799	148.04	-41.3176	148.255	972.54	425.875	331.43	329.267	328.565	328.916	17.5924	16.2339	15.8141	16.5468	340.839	136.863	1076.57	9820.23	0.15302	0	Post-Orogenic	Acid Plutonic Rocks	5	0	0	0	0
WAL2012_Wal-B	S085WTS001	Wal-B	Walcek	2012	10.1016/j.geomorph.2012.02.021	1420000	56900	8.28e+06	490000	5.83099	0.0714686	10.7	0.441	0.786	12.3	0.762	1.34	0.869919	0.0744085	0.131395	1	0	-32.3529	-69.0313	-32.344	-69.0257	736.31	1.51591	2652.01	2654.5	2625.94	2640.22	11.5884	18.8589	35.3062	21.9178	617.36	59.5925	213	1318.5	NaN	59.2868	Active	Siliciclastic Sedimentary Rocks	1	0	0	0	0
WAL2012_Wal-D	S085WTS002	Wal-D	Walcek	2012	10.1016/j.geomorph.2012.02.021	2400000	73900	17600000	1560000	7.33333	0.0938325	8.99	0.286	0.618	8.06	0.767	1.07	1.11538	0.100338	0.149497	2	0	-32.5501	-69.1409	-32.5533	-69.137	687.62	1.19975	3204.2	3202.83	3198.5	3200.67	13.0113	14.0049	4.90299	10.6397	483.5	50.7912	224.667	1530.67	NaN	74.3878	Active	Siliciclastic Sedimentary Rocks	2	1.19975	100	0	0
WAL2012_Wal-E	S085WTS003	Wal-E	Walcek	2012	10.1016/j.geomorph.2012.02.021	3050000	161000	21100000	2230000	6.91803	0.118137	6.88	0.379	0.569	6.49	0.748	0.965	1.06009	0.127742	0.170143	0	0	-32.5672	-69.1455	-32.5786	-69.1447	691.63	2.04282	3157.38	3156.11	3143	3149.56	11.6005	13.9708	12.5725	12.7146	402.793	67.2624	225.5	1531	NaN	74.3878	Active	Intermediate Volcanic Rocks	2	2.04282	100	0	0
WAL2012_Wal-G	S085WTS004	Wal-G	Walcek	2012	10.1016/j.geomorph.2012.02.021	159000	9040	1140000	1190000	7.16981	1.04541	95.6	5.45	7.85	91.7	96.3	96.6	1.04253	1.05171	1.05663	0	0	-32.6443	-69.1099	-32.6452	-69.1007	719.66	4.40992	2836.52	2843.58	2867.8	2855.69	31.608	29.3681	30.8014	30.5925	618.569	114.918	227	1496.83	NaN	102.432	Active	Siliciclastic Sedimentary Rocks	2	4.40992	100	0	0
WAL2012_Wal-M	S085WTS005	Wal-M	Walcek	2012	10.1016/j.geomorph.2012.02.021	198000	20500	1250000	343000	6.31313	0.293283	50.5	5.26	6.05	54.8	15.2	15.9	0.921533	0.296284	0.313906	0	0	-32.3822	-68.9919	-32.3708	-68.9817	789.69	4.40183	2089.09	2077.06	2101.75	2089.41	25.3034	25.4222	21.3108	24.0121	509.205	40.42	250.6	1485.4	NaN	59.1009	Active	Siliciclastic Sedimentary Rocks	1	0	0	0	0
WAL2012_Wal-N	S085WTS006	Wal-N	Walcek	2012	10.1016/j.geomorph.2012.02.021	108000	7440	804000	289000	7.44444	0.365994	77.2	5.34	7.03	72.3	26.2	26.9	1.06777	0.368922	0.383043	0	0	-32.4861	-68.9799	-32.4983	-68.9616	812.35	5.61778	1852.73	1844.45	1841.17	1842.81	28.9232	28.4839	37.6177	31.6749	643.659	76.7239	290.143	1704.86	NaN	56.8995	Active	Siliciclastic Sedimentary Rocks	1	0	0	0	0
WAN2017_Wang15	S202WTS001	Wang15	Wang	2017	10.1016/j.epsl.2017.05.030	125600	7700	683000	66000	5.4379	0.114439	44	2.72	3.77	55.6	5.43	7.27	0.791367	0.115583	0.156328	1	0	23.1539	102.781	23.2181	102.839	853.611	81.7063	1401.46	1402.86	1420.92	1411.89	29.6912	34.3117	34.8356	32.9462	742.343	154.514	1205.31	9416.68	0.123478	19.8166	Active	Metamorphic Rocks	2	0	0	0	0
WAN2017_Wang8	S202WTS002	Wang8	Wang	2017	10.1016/j.epsl.2017.05.030	47700	3900	330000	40000	6.91824	0.14621	132	10.9	13.4	133	16.2	19.9	0.992481	0.147157	0.180811	0	0	23.5868	101.785	23.6559	101.875	821.815	148.343	1735.04	1735.33	1747.9	1741.61	34.2213	32.0633	32.6302	32.9716	695.114	161.294	1157.91	8843.44	0.244688	18.0539	Active	Mixed Sedimentary Rocks	5	0	0	0	0
WIT2011_Ama-b	S068WTS074	Ama-b	Wittmann	2011	10.1016/j.jsames.2010.09.004	75876.7	3623.06	316036	93806.2	4.16513	0.300637	45.7	2.2	3.49	75.9	22.7	23.6	0.602108	0.302927	0.320176	1	0	-7.38987	-66.9573	-2.18591	-54.8492	912.853	4.75258e+06	NaN	471.425	471.438	471.431	NaN	6.34539	6.20404	6.27472	138.424	269.03	2181.08	16655.8	0.322438	7.75012	Active	Unconsolidated Sediments	13	52991	1.11499	0	0
WIT2011_Br-1a	S068WTS005	Br-1a	Wittmann	2011	10.1016/j.jsames.2010.09.004	320217	14208.2	1.97322e+06	138380	6.16213	0.082987	7.17	0.331	0.551	7.82	0.59	0.934	0.91688	0.0884506	0.142024	0	0	3.23554	-60.7412	1.91023	-61.0164	971.986	172988	NaN	314.554	314.543	314.548	NaN	5.71114	5.40753	5.55934	134.959	150.51	1967.09	12837.8	0.320326	0	Post-Orogenic	Metamorphic Rocks	9	0	0	0	0
WIT2011_Br-4c	S068WTS009	Br-4c	Wittmann	2011	10.1016/j.jsames.2010.09.004	291848	14120.4	1.69564e+06	152903	5.81	0.102334	7.86	0.395	0.622	9.19	0.883	1.22	0.855277	0.108432	0.15455	1	0	3.20841	-60.776	1.29091	-61.2992	973.061	182012	NaN	305.769	305.762	305.766	NaN	5.67258	5.38025	5.52641	134.248	152.445	1963.36	12822.7	0.323963	0	Post-Orogenic	Metamorphic Rocks	9	0	0	0	0
WIT2011_Br-5b	S068WTS010	Br-5b	Wittmann	2011	10.1016/j.jsames.2010.09.004	427977	35995.9	1.6739e+06	156739	3.91119	0.125865	5.15	0.459	0.56	9.26	0.923	1.25	0.556156	0.133712	0.173338	1	1	3.0999	-60.7692	0.951685	-61.3667	974.022	191863	NaN	295.761	295.76	295.76	NaN	5.5485	5.25997	5.40424	131.624	151.669	1959.29	12805.4	0.330106	0	Post-Orogenic	Metamorphic Rocks	9	0	0	0	0
WIT2011_Br-5c	S068WTS011	Br-5c	Wittmann	2011	10.1016/j.jsames.2010.09.004	309026	20216.3	1.73345e+06	109699	5.60941	0.0910194	7.34	0.5	0.674	8.91	0.601	1.01	0.823793	0.0958652	0.145882	1	0	3.0999	-60.7692	0.951685	-61.3667	974.022	191863	NaN	295.761	295.76	295.76	NaN	5.5485	5.25997	5.40424	131.624	151.669	1959.29	12805.4	0.330106	0	Post-Orogenic	Metamorphic Rocks	9	0	0	0	0
WIT2011_Br-8b-2	S068WTS016	Br-8b-2	Wittmann	2011	10.1016/j.jsames.2010.09.004	293747	19172.8	1.54931e+06	110887	5.27429	0.0968641	7.67	0.521	0.702	9.99	0.757	1.18	0.767768	0.101765	0.149428	1	1	2.83765	-60.9098	0.467958	-61.708	975.513	213834	NaN	283.589	283.608	283.599	NaN	5.50643	5.26406	5.38524	130.695	157.247	1967.28	12919	0.333711	0	Post-Orogenic	Metamorphic Rocks	9	0	0	0	0
WIT2011_Cb-10b-2	S068WTS036	Cb-10b-2	Wittmann	2011	10.1016/j.jsames.2010.09.004	111544	8173.48	668061	82571.4	5.98922	0.143687	25.5	1.89	2.43	29.7	3.74	4.55	0.858586	0.146119	0.180418	0	0	-16.3482	-52.013	-14.5684	-50.991	952.088	77067.4	NaN	520.064	520.125	520.094	NaN	5.70453	5.29868	5.5016	119.443	75.0225	1622.33	10308.4	0.133575	0	Post-Orogenic	Siliciclastic Sedimentary Rocks	10	0	0	0	0
WIT2011_Cb-2a	S068WTS018	Cb-2a	Wittmann	2011	10.1016/j.jsames.2010.09.004	147445	7947.35	930572	63390	6.31133	0.086865	16.9	0.929	1.38	18.5	1.3	2.09	0.913514	0.0892169	0.139394	0	0	-14.6812	-59.9869	-13.5375	-60.9801	970.369	51961.3	NaN	343.895	343.784	343.839	NaN	4.21988	4.2626	4.24124	90.9288	94.551	1612.86	10360.2	0.279345	0	Post-Orogenic	Unconsolidated Sediments	6	0	0	0	0
WIT2011_Cb-3a-2	S068WTS020	Cb-3a-2	Wittmann	2011	10.1016/j.jsames.2010.09.004	344770	36209	1.68714e+06	131438	4.89352	0.130764	6.7	0.735	0.843	9.43	0.781	1.16	0.710498	0.137454	0.175962	1	1	-11.1078	-59.3711	-10.1627	-59.4442	972.345	15247.9	NaN	339.508	339.478	339.493	NaN	4.71039	3.95716	4.33377	94.5344	39.4685	1923.75	14269	0.203317	0	Post-Orogenic	Metamorphic Rocks	5	0	0	0	0
WIT2011_Cb-4a-1	S068WTS021	Cb-4a-1	Wittmann	2011	10.1016/j.jsames.2010.09.004	107211	9768.68	716471	69509.7	6.68282	0.133096	24.1	2.22	2.65	25	2.48	3.32	0.964	0.135374	0.172414	0	0	-12.2898	-57.8742	-9.93111	-58.2226	964.646	155614	NaN	401.139	401.156	401.147	NaN	2.95084	2.84187	2.89635	61.4343	25.9502	1975	13978.9	0.233557	0	Post-Orogenic	Siliciclastic Sedimentary Rocks	5	0	0	0	0
WIT2011_Cb-6b-3	S068WTS027	Cb-6b-3	Wittmann	2011	10.1016/j.jsames.2010.09.004	159626	8682.85	906732	79100.4	5.68036	0.102806	15.6	0.864	1.28	19	1.71	2.4	0.821053	0.105676	0.150626	1	0	-11.962	-55.361	-9.64166	-56.0215	968.393	81520.6	NaN	376.449	376.462	376.455	NaN	3.04105	2.69222	2.86664	63.7185	35.1341	2008.85	13781.6	0.287628	0	Post-Orogenic	Siliciclastic Sedimentary Rocks	9	0	0	0	0
WIT2011_Cb-7b-2	S068WTS030	Cb-7b-2	Wittmann	2011	10.1016/j.jsames.2010.09.004	300212	36856.7	1.50437e+06	133722	5.01103	0.15157	7.88	1	1.11	10.9	1.02	1.42	0.722936	0.157675	0.19187	1	0	-10.3307	-54.588	-10.2116	-54.9662	969.776	10852.4	NaN	362.7	362.754	362.727	NaN	4.23995	3.39905	3.8195	84.865	30.9006	2182.14	14577.9	0.289339	0	Post-Orogenic	Acid Plutonic Rocks	5	0	0	0	0
WIT2011_Cb-8b-2	S068WTS033	Cb-8b-2	Wittmann	2011	10.1016/j.jsames.2010.09.004	204866	8738.41	1.04813e+06	57270.2	5.11615	0.0693179	11.9	0.522	0.891	16.2	0.918	1.71	0.734568	0.071661	0.129414	1	1	-12.6674	-53.5684	-10.7761	-53.0974	969.657	139351	NaN	368.646	368.665	368.655	NaN	2.55764	2.48644	2.52204	51.4625	22.531	1764.41	11860.1	0.276441	0	Post-Orogenic	Unconsolidated Sediments	5	0	0	0	0
WIT2011_Ir-04b	S068WTS053	Ir-04b	Wittmann	2011	10.1016/j.jsames.2010.09.004	80002.8	5145.57	450854	147788	5.63548	0.334046	44.9	2.91	3.95	55.3	18.3	19	0.811935	0.337209	0.354664	0	0	-5.17755	-69.5097	-3.32385	-58.8152	906.479	3.0166e+06	NaN	496.17	496.228	496.199	NaN	6.50611	6.47919	6.49265	142.391	282.811	2370.98	18757.4	0.308591	8.91719	Active	Unconsolidated Sediments	13	44885.1	1.48794	0	0
WIT2011_Ir-04c	S068WTS054	Ir-04c	Wittmann	2011	10.1016/j.jsames.2010.09.004	121457	4279.33	848183	75446.8	6.98338	0.0956748	29.7	1.06	2.06	29.4	2.67	3.72	1.0102	0.0975777	0.144294	0	0	-5.17755	-69.5097	-3.32385	-58.8152	906.479	3.0166e+06	NaN	496.17	496.228	496.199	NaN	6.50611	6.47919	6.49265	142.391	282.811	2370.98	18757.4	0.308591	8.91719	Active	Unconsolidated Sediments	13	44885.1	1.48794	0	0
WIT2011_Ir-10b	S068WTS055	Ir-10b	Wittmann	2011	10.1016/j.jsames.2010.09.004	81581.6	4169.24	430394	75446.8	5.27563	0.182595	44	2.27	3.46	57.8	10.2	11.4	0.761246	0.183857	0.21233	1	0	-5.17755	-69.5097	-3.32385	-58.8152	906.479	3.0166e+06	NaN	496.17	496.228	496.199	NaN	6.50611	6.47919	6.49265	142.391	282.811	2370.98	18757.4	0.308591	8.91719	Active	Unconsolidated Sediments	13	44885.1	1.48794	0	0
WIT2011_Ir-10c	S068WTS056	Ir-10c	Wittmann	2011	10.1016/j.jsames.2010.09.004	131713	6572.18	589691	44939.3	4.4771	0.0910905	27.4	1.38	2.14	42.4	3.28	4.95	0.646226	0.0923091	0.140461	1	1	-5.17755	-69.5097	-3.32385	-58.8152	906.479	3.0166e+06	NaN	496.17	496.228	496.199	NaN	6.50611	6.47919	6.49265	142.391	282.811	2370.98	18757.4	0.308591	8.91719	Active	Unconsolidated Sediments	13	44885.1	1.48794	0	0
WIT2011_Ir-15b	S068WTS057	Ir-15b	Wittmann	2011	10.1016/j.jsames.2010.09.004	92139.1	3976.81	350198	73802.7	3.80075	0.21512	39	1.7	2.87	70.9	15.1	16.3	0.550071	0.217391	0.241392	1	1	-5.17755	-69.5097	-3.32385	-58.8152	906.479	3.0166e+06	NaN	496.17	496.228	496.199	NaN	6.50611	6.47919	6.49265	142.391	282.811	2370.98	18757.4	0.308591	8.91719	Active	Unconsolidated Sediments	13	44885.1	1.48794	0	0
WIT2011_Ir-15c	S068WTS058	Ir-15c	Wittmann	2011	10.1016/j.jsames.2010.09.004	141463	5186.28	660936	54621.3	4.67216	0.0904093	25.5	0.946	1.79	37.8	3.17	4.58	0.674603	0.0917015	0.140029	1	1	-5.17755	-69.5097	-3.32385	-58.8152	906.479	3.0166e+06	NaN	496.17	496.228	496.199	NaN	6.50611	6.47919	6.49265	142.391	282.811	2370.98	18757.4	0.308591	8.91719	Active	Unconsolidated Sediments	13	44885.1	1.48794	0	0
WIT2011_Mad-11c	S068WTS065	Mad-11c	Wittmann	2011	10.1016/j.jsames.2010.09.004	198942	8867.93	953316	94628.2	4.79192	0.108812	17.6	0.797	1.32	25.4	2.58	3.42	0.692913	0.111212	0.154125	1	1	-11.751	-64.0745	-3.40031	-58.7883	913.436	1.32255e+06	NaN	513.764	513.669	513.717	NaN	6.90605	6.69368	6.79987	148.042	274.788	1747.83	12306.4	0.348691	7.51156	Active	Mixed Sedimentary Rocks	11	8105.82	0.612892	0	0
WIT2011_Mad-18b	S068WTS067	Mad-18b	Wittmann	2011	10.1016/j.jsames.2010.09.004	59892.1	3421.89	398699	148976	6.65695	0.377997	57.9	3.33	4.78	60.8	22.9	23.5	0.952303	0.38101	0.395231	0	0	-11.751	-64.0745	-3.40031	-58.7883	913.436	1.32255e+06	NaN	513.764	513.669	513.717	NaN	6.90605	6.69368	6.79987	148.042	274.788	1747.83	12306.4	0.348691	7.51156	Active	Mixed Sedimentary Rocks	11	8105.82	0.612892	0	0
WIT2011_Man-02a	S068WTS043	Man-02a	Wittmann	2011	10.1016/j.jsames.2010.09.004	58102.7	3644.07	492688	187978	8.4796	0.386656	68.8	4.33	5.95	57.1	22	22.5	1.2049	0.390395	0.403424	0	0	-6.4551	-71.6776	-3.33728	-60.5535	885.826	2.18634e+06	NaN	623.86	623.943	623.902	NaN	7.87106	7.89533	7.8832	169.92	317.937	2315.02	18832.7	0.292683	12.279	Active	Unconsolidated Sediments	13	44885.1	2.05298	0	0
WIT2011_Man-11b	S068WTS047	Man-11b	Wittmann	2011	10.1016/j.jsames.2010.09.004	69338.3	3035.31	299687	79831.2	4.32209	0.269955	58	2.55	4.28	92.2	24.7	26	0.629067	0.27148	0.291491	1	0	-6.4551	-71.6776	-3.33728	-60.5535	885.826	2.18634e+06	NaN	623.86	623.943	623.902	NaN	7.87106	7.89533	7.8832	169.92	317.937	2315.02	18832.7	0.292683	12.279	Active	Unconsolidated Sediments	13	44885.1	2.05298	0	0
WIT2011_Man-11c-2	S068WTS049	Man-11c-2	Wittmann	2011	10.1016/j.jsames.2010.09.004	73105.3	6339.54	439254	42564.4	6.00851	0.130038	55.2	4.81	5.82	63.7	6.23	8.33	0.866562	0.130989	0.167979	1	0	-6.4551	-71.6776	-3.33728	-60.5535	885.826	2.18634e+06	NaN	623.86	623.943	623.902	NaN	7.87106	7.89533	7.8832	169.92	317.937	2315.02	18832.7	0.292683	12.279	Active	Unconsolidated Sediments	13	44885.1	2.05298	0	0
WIT2011_Man-24a	S068WTS050	Man-24a	Wittmann	2011	10.1016/j.jsames.2010.09.004	56079.1	6355.54	304893	37540.7	5.43684	0.167345	71.1	8.1	9.13	90.7	11.2	13.7	0.783903	0.168009	0.198254	1	0	-6.4551	-71.6776	-3.33728	-60.5535	885.826	2.18634e+06	NaN	623.86	623.943	623.902	NaN	7.87106	7.89533	7.8832	169.92	317.937	2315.02	18832.7	0.292683	12.279	Active	Unconsolidated Sediments	13	44885.1	2.05298	0	0
WIT2011_Ne-Lb-a	S068WTS040	Ne-Lb-a	Wittmann	2011	10.1016/j.jsames.2010.09.004	73489.5	5934.04	297312	23383	4.04563	0.112719	30.3	2.47	3.06	53.1	4.22	6.26	0.570621	0.113847	0.155233	1	1	1.01992	-64.0873	-3.0709	-60.2257	989.311	749529	NaN	172.015	172.027	172.021	NaN	3.10288	2.95124	3.02706	74.6748	136.91	2534.78	18596.3	0.343831	0	Post-Orogenic	Unconsolidated Sediments	12	0	0	0	0
WIT2011_Ne-Lb-b	S068WTS041	Ne-Lb-b	Wittmann	2011	10.1016/j.jsames.2010.09.004	68012.9	3526.73	293201	23657.1	4.31097	0.0959112	32.8	1.71	2.6	53.9	4.39	6.42	0.608534	0.0967037	0.143075	1	1	1.01992	-64.0873	-3.0709	-60.2257	989.311	749529	NaN	172.015	172.027	172.021	NaN	3.10288	2.95124	3.02706	74.6748	136.91	2534.78	18596.3	0.343831	0	Post-Orogenic	Unconsolidated Sediments	12	0	0	0	0
WIT2011_Ne-Rb-a	S068WTS037	Ne-Rb-a	Wittmann	2011	10.1016/j.jsames.2010.09.004	93770.9	4255.67	435326	30598.9	4.64245	0.0836678	23.5	1.08	1.77	35.7	2.55	4.03	0.658263	0.084936	0.135706	1	1	1.01992	-64.0873	-3.0709	-60.2257	989.311	749529	NaN	172.015	172.027	172.021	NaN	3.10288	2.95124	3.02706	74.6748	136.91	2534.78	18596.3	0.343831	0	Post-Orogenic	Unconsolidated Sediments	12	0	0	0	0
WIT2011_Ne-Rb-b	S068WTS038	Ne-Rb-b	Wittmann	2011	10.1016/j.jsames.2010.09.004	83397.6	5165.52	434230	29320.1	5.20675	0.0916276	26.6	1.66	2.3	35.8	2.46	3.98	0.743017	0.0928239	0.14084	1	1	1.01992	-64.0873	-3.0709	-60.2257	989.311	749529	NaN	172.015	172.027	172.021	NaN	3.10288	2.95124	3.02706	74.6748	136.91	2534.78	18596.3	0.343831	0	Post-Orogenic	Unconsolidated Sediments	12	0	0	0	0
WIT2011_Par-09a	S068WTS068	Par-09a	Wittmann	2011	10.1016/j.jsames.2010.09.004	56556.8	3306.03	333300	37814.8	5.89319	0.127629	61.1	3.59	5.1	72.6	8.31	10.4	0.841598	0.128662	0.165795	1	0	-7.38384	-67.4166	-2.59242	-56.6638	911.401	4.54686e+06	NaN	483.282	483.296	483.289	NaN	6.45661	6.34807	6.40234	140.504	274.578	2179.89	16738.1	0.322102	8.0966	Active	Unconsolidated Sediments	13	52991	1.16544	0	0
WIT2011_Par-22b	S068WTS072	Par-22b	Wittmann	2011	10.1016/j.jsames.2010.09.004	62282.9	5655.35	402353	189348	6.46008	0.479281	55.8	5.09	6.08	60.2	28.6	29.1	0.92691	0.483761	0.495517	0	0	-7.38384	-67.4166	-2.59242	-56.6638	911.401	4.54686e+06	NaN	483.282	483.296	483.289	NaN	6.45661	6.34807	6.40234	140.504	274.578	2179.89	16738.1	0.322102	8.0966	Active	Unconsolidated Sediments	13	52991	1.16544	0	0
WIT2011_Pe-101a-2	S068WTS004	Pe-101a-2	Wittmann	2011	10.1016/j.jsames.2010.09.004	73332	7713.07	450215	53433.9	6.1394	0.158585	96	10.1	11.6	107	12.8	15.8	0.897196	0.159309	0.190802	0	0	-7.97021	-75.4575	-3.59919	-73.13	788.073	741138	NaN	1448.33	1448.4	1448.37	NaN	18.9347	19.2901	19.1124	404.806	431.167	1777.34	14132.5	0.280871	27.9075	Active	Mixed Sedimentary Rocks	12	42738.8	5.76664	0	0
WIT2011_Pe-107a-2	S068WTS002	Pe-107a-2	Wittmann	2011	10.1016/j.jsames.2010.09.004	45894.7	3567.73	313388	68322.3	6.8284	0.231457	181	14.1	17.7	183	40.1	43.1	0.989071	0.232561	0.255014	0	0	-10.0328	-74.0217	-4.47883	-73.4309	753.467	357113	NaN	1749.44	1749.56	1749.5	NaN	19.4981	19.7751	19.6366	416.843	440.216	1596.74	12283.4	0.285397	34.8658	Active	Mixed Sedimentary Rocks	11	34426	9.64008	0	0
WIT2011_Tapa-b-2	S068WTS076	Tapa-b-2	Wittmann	2011	10.1016/j.jsames.2010.09.004	96205.9	5887.43	650523	40920.3	6.76178	0.0877601	25.3	1.57	2.18	26	1.67	2.83	0.973077	0.089311	0.138824	0	0	-8.59579	-56.863	-2.4113	-54.7231	973.329	492306	NaN	304.196	304.193	304.194	NaN	3.44062	2.98282	3.21172	75.4667	39.9709	2074.33	14938.8	0.293791	0	Post-Orogenic	Siliciclastic Sedimentary Rocks	11	0	0	0	0
WIT2011_Tapa-c	S068WTS077	Tapa-c	Wittmann	2011	10.1016/j.jsames.2010.09.004	80765.3	5089.01	461815	37997.4	5.71799	0.103634	30.3	1.93	2.65	37.1	3.1	4.48	0.816712	0.105067	0.1491	1	0	-8.59579	-56.863	-2.4113	-54.7231	973.329	492306	NaN	304.196	304.193	304.194	NaN	3.44062	2.98282	3.21172	75.4667	39.9709	2074.33	14938.8	0.293791	0	Post-Orogenic	Siliciclastic Sedimentary Rocks	11	0	0	0	0
WIT2016_D1	S143WTS037	D1	Wittmann	2016	10.1016/j.epsl.2016.07.017	26400	1700	236000	65000	8.93939	0.282851	258	16.6	22.6	204	56.4	59	1.26471	0.283859	0.30219	0	0	45.3451	9.10879	44.9545	12.3162	896.72	73414.8	746.22	757.032	757.066	757.049	22.6338	25.061	25.8	24.4983	525.193	527.671	934.814	9418.75	0.249779	12.235	Active	Unconsolidated Sediments	10	17612.1	23.9899	480.8	0.65
WIT2016_D2	S143WTS038	D2	Wittmann	2016	10.1016/j.epsl.2016.07.017	21900	1200	131900	6400	6.02283	0.0731901	312	17.1	25.2	373	18.1	36.8	0.836461	0.0732025	0.127504	1	1	45.3451	9.10879	44.9545	12.3162	896.72	73414.8	746.22	757.032	757.066	757.049	22.6338	25.061	25.8	24.4983	525.193	527.671	934.814	9418.75	0.249779	12.235	Active	Unconsolidated Sediments	10	17612.1	23.9899	480.8	0.65
WIT2016_D3	S143WTS039	D3	Wittmann	2016	10.1016/j.epsl.2016.07.017	22600	1400	132000	32000	5.84071	0.250214	302	18.7	25.9	372	90.4	95.9	0.811828	0.250776	0.271687	0	0	45.3451	9.10879	44.9545	12.3162	896.72	73414.8	746.22	757.032	757.066	757.049	22.6338	25.061	25.8	24.4983	525.193	527.671	934.814	9418.75	0.249779	12.235	Active	Unconsolidated Sediments	10	17612.1	23.9899	480.8	0.65
WIT2016_P1	S143WTS026	P1	Wittmann	2016	10.1016/j.epsl.2016.07.017	33000	1600	202000	21000	6.12121	0.114711	275	13.4	21	320	33.3	43.3	0.859375	0.114906	0.155373	1	0	45.1711	7.61142	45.0455	8.63289	854.99	17365.7	1096.37	1107.92	1106.6	1107.26	27.2111	31.4765	33.0299	30.5725	666.369	560.441	959.54	9808.01	0.21782	3.54711	Active	Metamorphic Rocks	9	5232.16	30.1293	207.7	1.2
WIT2016_P2	S143WTS027	P2	Wittmann	2016	10.1016/j.epsl.2016.07.017	32100	1400	203000	29000	6.32399	0.149366	174	7.59	12.8	197	28.2	32.9	0.883249	0.149646	0.182489	0	0	44.5885	8.07264	44.9671	8.72371	922.48	8124.38	636.61	646.682	648.126	647.404	20.4962	18.878	17.7919	19.0554	389.089	361.109	819.924	7464.91	0.290931	5.58107	Active	Carbonate Sedimentary Rocks	8	162.195	1.99639	1.5	0.02
WIT2016_P3-1	S143WTS028	P3-1	Wittmann	2016	10.1016/j.epsl.2016.07.017	36600	1900	236000	27000	6.44809	0.125634	208	10.8	16.4	230	26.4	33	0.904348	0.12598	0.163715	0	0	45.0226	7.81425	45.0588	8.89376	878.94	26844.3	920.91	931.752	931.383	931.567	24.6415	26.7481	27.3044	26.2314	562.31	516.246	923.309	9126.27	0.241247	4.62055	Active	Unconsolidated Sediments	9	5394.36	20.095	209.2	0.78
WIT2016_P6-2	S143WTS033	P6-2	Wittmann	2016	10.1016/j.epsl.2016.07.017	29800	2500	174000	21000	5.83893	0.146983	258	21.6	26.5	315	38.1	46.8	0.819048	0.147101	0.18062	1	0	45.3409	8.1076	45.1029	9.37212	879.34	38528.1	887.49	898.899	898.766	898.832	25.5533	28.2121	28.9477	27.571	591.194	542.396	986.809	9982.59	0.222359	5.76491	Active	Unconsolidated Sediments	10	10261.8	26.6347	298.6	0.78
WIT2016_T15	S143WTS015	T15	Wittmann	2016	10.1016/j.epsl.2016.07.017	13400	1500	90000	11000	6.71642	0.165737	1020	114	129	1070	131	160	0.953271	0.165772	0.195844	0	0	45.0549	6.95694	45.0955	7.39886	801.56	1180.82	1763.82	1783.83	1781.98	1782.91	40.9114	53.175	59.2028	51.0964	1132.33	330.221	1171.26	12168.7	0.0385827	3.14424	Active	Metamorphic Rocks	6	768.214	65.0577	2	0.17
WIT2016_T16	S143WTS016	T16	Wittmann	2016	10.1016/j.epsl.2016.07.017	62300	2800	356000	24000	5.71429	0.0810236	161	7.25	12	200	13.5	21.9	0.805	0.0811421	0.13246	1	1	44.6704	7.22938	44.647	7.43288	837.9	249.746	1408.4	1424.98	1411.13	1418.05	35.2854	41.6872	46.1172	41.0299	909.127	260.814	999.32	9785.01	0.0845781	3.46068	Active	Metamorphic Rocks	3	21.5854	8.64294	0.3	0.1
WIT2016_T17	S143WTS017	T17	Wittmann	2016	10.1016/j.epsl.2016.07.017	56400	2500	343000	34000	6.08156	0.108585	220	9.76	16.3	255	25.3	33.5	0.862745	0.108682	0.150825	1	0	44.5968	7.17286	44.5879	7.51711	808.76	439.581	1687.76	1700.27	1698.29	1699.28	38.7925	46.0095	46.4457	43.7493	949.253	267.611	1017.01	10235.1	0.0906124	1.36789	Active	Metamorphic Rocks	6	72.8647	16.5759	0.3	0.07
WIT2016_T18	S143WTS018	T18	Wittmann	2016	10.1016/j.epsl.2016.07.017	31000	1400	186000	34000	6	0.188292	374	16.9	27.8	441	80.7	89.2	0.848073	0.18849	0.215493	0	0	44.2868	7.29809	44.4678	7.65866	819.23	1204.27	1614.83	1630.33	1631.76	1631.04	42.665	47.9955	45.7458	45.4687	966.983	352.594	974.361	9570.73	0.0838008	1.10696	Active	Metamorphic Rocks	8	87.7343	7.28527	1.5	0.12
WIT2016_T23	S143WTS023	T23	Wittmann	2016	10.1016/j.epsl.2016.07.017	11200	2400	185000	44000	16.5179	0.320133	506	108	113	214	51.1	54.3	2.36449	0.320272	0.338016	2	2	44.4723	10.2968	44.6213	10.4087	923.76	479.903	731.53	740.335	736.518	738.426	22.6114	24.0779	23.4586	23.3827	496.559	179.632	1313.53	13258.4	0.14156	40.0778	Active	Carbonate Sedimentary Rocks	3	41.1425	8.57309	0	0
WIT2016_T24	S143WTS024	T24	Wittmann	2016	10.1016/j.epsl.2016.07.017	9200	2800	91000	17000	9.8913	0.357109	662	202	205	474	88.6	97.5	1.39662	0.357837	0.371759	2	0	44.3633	10.5476	44.5329	10.7579	913.9	1004.49	801.57	812.491	811.529	812.01	22.9141	25.7393	25.7569	24.8035	527.859	186.523	1176.03	11773	0.107326	40.1798	Active	Carbonate Sedimentary Rocks	5	89.7567	8.93554	0	0
WIT2020_1	S266WTS001	1	Wittmann	2020	10.1016/j.earscirev.2020.103147	41500	2000	268000	33000	6.45783	0.132229	142	6.86	10.8	157	19.4	23.7	0.904459	0.132675	0.169033	0	0	60.7494	-118.955	67.4628	-133.763	934.019	1.69941e+06	NaN	623.259	622.86	623.06	NaN	7.71088	8.1957	7.95329	178.56	256.41	407.215	5830.07	0.567572	0.721189	Post-Orogenic	Mixed Sedimentary Rocks	13	1.65518e+06	97.3972	0	0
WIT2020_10	S266WTS010	10	Wittmann	2020	10.1016/j.earscirev.2020.103147	312000	11000	2020000	109000	6.47436	0.0644573	22	0.787	1.53	23.6	1.3	2.45	0.932203	0.0656812	0.124955	1	0	37.6278	-100.973	36.063	-95.9791	870.338	188299	NaN	1063.11	1062.27	1062.69	NaN	3.48842	3.73911	3.61377	75.9866	137.495	549.306	3042.46	0.873159	0	Post-Orogenic	Unconsolidated Sediments	12	2904.28	1.54237	0	0
WIT2020_11	S266WTS011	11	Wittmann	2020	10.1016/j.earscirev.2020.103147	43900	2200	223000	23000	5.07973	0.114669	95.6	4.81	7.42	135	14	18.3	0.708148	0.115265	0.156203	1	1	46.2596	-94.2527	44.9042	-93.196	968.334	51534.2	NaN	379.812	378.83	379.321	NaN	1.14656	1.00566	1.07611	27.1965	14.3022	696.019	6923.78	0.495268	0	Post-Orogenic	Siliciclastic Sedimentary Rocks	9	51534.2	100	0	0
WIT2020_12	S266WTS012	12	Wittmann	2020	10.1016/j.earscirev.2020.103147	81400	3200	735000	179000	9.02948	0.24669	67	2.65	4.77	52.2	12.9	13.6	1.28352	0.250272	0.270089	2	0	40.7238	-96.61	30.4368	-91.1958	914.768	3.18796e+06	NaN	665.784	664.819	665.301	NaN	3.87694	3.69884	3.78789	82.8663	116.194	767.084	5683.16	0.667374	0.507647	Post-Orogenic	Siliciclastic Sedimentary Rocks	13	603421	18.9281	0	0
WIT2020_13	S266WTS013	13	Wittmann	2020	10.1016/j.earscirev.2020.103147	62200	2500	383000	37000	6.15756	0.104633	43.4	1.76	3.12	49.5	4.83	6.47	0.876768	0.105667	0.149172	1	0	5.63761	-68.6468	8.14566	-63.5623	956.339	822293	447.22	344.896	344.806	344.851	NaN	6.50425	6.62137	6.56281	144.824	254.287	2275.64	14547.7	0.393657	8.07114	Active	Unconsolidated Sediments	11	2249.59	0.273575	0	0
WIT2020_15	S266WTS015	15	Wittmann	2020	10.1016/j.earscirev.2020.103147	108000	4000	691000	29000	6.39815	0.0559738	44.6	1.66	3.13	49.1	2.09	4.76	0.90835	0.0565437	0.119681	1	0	40.1062	-5.08318	39.0291	-8.8214	931.337	69326.6	622.66	660.585	660.173	660.379	9.68927	9.34355	9.40498	9.47926	197.856	174.297	577.805	3844.79	0.698402	0	Post-Orogenic	Siliciclastic Sedimentary Rocks	9	58.003	0.0836663	0	0
WIT2020_16	S266WTS016	16	Wittmann	2020	10.1016/j.earscirev.2020.103147	57600	2400	523000	52000	9.07986	0.107804	101	4.24	7.35	79.1	7.93	10.5	1.27686	0.108687	0.151382	2	2	41.6385	-5.19488	41.1542	-7.78787	907.171	91398.4	894.95	901.049	901.098	901.073	8.05371	7.71617	7.63537	7.80175	162.155	159.408	690.204	5315.31	0.540247	0	Post-Orogenic	Mixed Sedimentary Rocks	10	580.647	0.635293	0	0
WIT2020_18	S266WTS018	18	Wittmann	2020	10.1016/j.earscirev.2020.103147	71600	2500	528000	65000	7.3743	0.127962	65	2.28	4.47	62.3	7.75	9.45	1.04334	0.129249	0.166546	0	0	49.8984	14.3918	51.1041	13.621	957.608	53575.6	455.13	464.283	464.38	464.332	7.33142	6.91774	6.73897	6.99604	147.563	91.9783	661.703	8049.39	0.148636	0	Post-Orogenic	Metamorphic Rocks	12	389.471	0.726955	0	0
WIT2020_19	S266WTS019	19	Wittmann	2020	10.1016/j.earscirev.2020.103147	35800	2500	254000	24000	7.09497	0.117493	145	10.1	13.3	146	13.8	18.7	0.993151	0.117414	0.157538	0	0	48.8929	8.355	50.9543	6.97893	942.725	144575	519.76	520.496	520.779	520.638	7.81868	12.6366	12.1462	10.8672	260.231	309.108	957.474	11317.9	0.0933485	1.83816	Active	Mixed Sedimentary Rocks	12	27626.8	19.109	0	0
WIT2020_2	S266WTS002	2	Wittmann	2020	10.1016/j.earscirev.2020.103147	45200	2900	245000	34000	5.42035	0.152889	163	10.5	14.2	216	30.1	35.4	0.75463	0.15352	0.185604	1	0	65.4955	-135.508	67.4023	-134.913	903.464	72329.9	NaN	893.57	893.761	893.665	NaN	18.1195	19.1238	18.6216	445.64	279.299	350.979	5698.63	0.587494	1.25883	Active	Mixed Sedimentary Rocks	10	34073.6	47.1086	0	0
WIT2020_20	S266WTS020	20	Wittmann	2020	10.1016/j.earscirev.2020.103147	12300	900	116000	13000	9.43089	0.133841	482	35.3	45.3	365	41	51.6	1.32055	0.134095	0.16976	2	2	48.1834	10.1581	48.7633	11.4325	925.596	20157.7	699.48	713.302	712.54	712.921	9.58315	9.39524	8.45207	9.14349	188.583	268.867	996.435	12066.4	0.062072	5.49147	Active	Unconsolidated Sediments	7	3650.98	18.1121	0	0
WIT2020_21	S266WTS021	21	Wittmann	2020	10.1016/j.earscirev.2020.103147	39900	3600	266000	24000	6.66667	0.127598	119	10.7	12.8	127	11.5	15.9	0.937008	0.12761	0.165058	0	0	44.7639	17.6819	44.7878	20.3794	946.25	88500.5	559.2	511.834	511.383	511.609	25.9911	14.2068	13.7894	17.9958	297.533	254.753	1000.15	10193.4	0.151062	9.58337	Active	Siliciclastic Sedimentary Rocks	10	915.75	1.03474	0	0
WIT2020_22	S266WTS022	22	Wittmann	2020	10.1016/j.earscirev.2020.103147	163000	6500	900000	60000	5.52147	0.077683	28.5	1.15	2.05	36.4	2.47	4.02	0.782967	0.078948	0.131798	1	1	46.3725	20.2715	45.3208	28.8375	949.608	785887	458.84	459.851	459.749	459.8	11.8688	11.3896	10.9184	11.3923	234.936	266.381	749.154	8088.71	0.272948	5.46274	Active	Siliciclastic Sedimentary Rocks	12	43190.9	5.49581	0	0
WIT2020_23	S266WTS023	23	Wittmann	2020	10.1016/j.earscirev.2020.103147	66900	2700	148000	11000	2.21226	0.084575	68.5	2.78	4.92	225	16.8	25.6	0.304444	0.0849833	0.134552	1	1	42.657	12.5762	41.879	12.4705	945.297	16061.7	527.34	537.238	536.607	536.922	17.6931	17.6832	17.9321	17.7695	372.111	243.773	700.085	5903.81	0.352767	34.4087	Active	Carbonate Sedimentary Rocks	8	31.2265	0.194416	0	0
WIT2020_24	S266WTS024	24	Wittmann	2020	10.1016/j.earscirev.2020.103147	65600	2600	338000	53000	5.15244	0.161736	98.9	3.93	7.05	137	21.6	24.6	0.721898	0.162595	0.193194	1	0	45.724	5.72427	43.5937	4.66269	902.387	96589.2	774.56	784.578	783.945	784.261	18.6279	21.3865	21.7828	20.599	447.381	428.692	1039.11	10315.6	0.161021	1.55333	Active	Carbonate Sedimentary Rocks	9	27061.3	28.0169	0	0
WIT2020_26	S266WTS026	26	Wittmann	2020	10.1016/j.earscirev.2020.103147	39900	1900	205000	27000	5.13784	0.140051	156	7.46	11.9	220	29.1	34.7	0.709091	0.140652	0.175205	1	1	61.6337	11.1594	60.2375	11.7552	926.613	18632.8	NaN	710.469	710.202	710.336	NaN	13.2716	14.9324	14.102	283.266	144.93	669.521	11735	0.167979	0	Post-Orogenic	Mixed Sedimentary Rocks	5	18632.8	100	0	0
WIT2020_28	S266WTS028	28	Wittmann	2020	10.1016/j.earscirev.2020.103147	248000	7800	1012000	43000	4.08065	0.0528641	14.7	0.471	1	26	1.13	2.55	0.565385	0.0539955	0.11936	1	1	53.8142	34.0319	52.9875	34.0375	988.974	14545.3	205.98	203.358	203.366	203.362	2.18884	1.69869	1.57138	1.81964	36.153	11.5876	640.083	8244.28	0.248629	0	Post-Orogenic	Mixed Sedimentary Rocks	3	0	0	0	0
WIT2020_29	S266WTS029	29	Wittmann	2020	10.1016/j.earscirev.2020.103147	43400	1500	68000	5000	1.56682	0.0812473	128	4.44	8.78	605	44.6	68.6	0.21157	0.0814722	0.132522	1	1	61.3401	122.086	72.421	126.779	941.683	2.46322e+06	NaN	588.784	588.849	588.817	NaN	11.0914	10.7973	10.9443	230.277	208.814	372.034	6166.66	0.654218	0.172268	Post-Orogenic	Siliciclastic Sedimentary Rocks	12	294180	11.9429	0	0
WIT2020_3	S266WTS003	3	Wittmann	2020	10.1016/j.earscirev.2020.103147	35000	1700	201000	28000	5.74286	0.147528	180	8.74	13.8	225	31.5	37	0.8	0.148181	0.181438	1	0	56.8212	-115.008	61.1995	-113.213	922.778	609158	NaN	726.603	725.71	726.157	NaN	7.85601	7.79017	7.82309	163.685	241.379	494.408	6167.49	0.47411	0.847058	Post-Orogenic	Siliciclastic Sedimentary Rocks	12	609158	100	0	0
WIT2020_32	S266WTS032	32	Wittmann	2020	10.1016/j.earscirev.2020.103147	11100	500	76000	10000	6.84685	0.139076	687	31	51	703	92.6	111	0.97724	0.139236	0.174476	0	0	29.1947	78.9848	26.8497	80.1211	801.643	82481.2	NaN	1081.87	1082.46	1082.16	NaN	17.3792	17.7634	17.5713	389.02	558.557	1231.45	7603.73	0.519548	30.4474	Active	Unconsolidated Sediments	8	8057.23	9.76856	0	0
WIT2020_33	S266WTS033	33	Wittmann	2020	10.1016/j.earscirev.2020.103147	32800	2500	282000	69000	8.59756	0.256277	187	14.3	18.1	154	37.8	40.1	1.21429	0.257091	0.277797	0	0	26.5831	81.0539	23.8127	89.554	831.976	942957	NaN	846.934	846.896	846.915	NaN	11.4172	11.683	11.5501	249.496	447.788	1068.18	6060.78	0.627389	17.3688	Active	Unconsolidated Sediments	11	47658.3	5.05413	0	0
WIT2020_34	S266WTS034	34	Wittmann	2020	10.1016/j.earscirev.2020.103147	16800	1200	52000	9000	3.09524	0.187237	670	47.9	62.1	1460	252	282	0.458904	0.186823	0.214238	1	1	27.1997	84.8705	23.4545	90.261	731.07	1.48572e+06	NaN	1639.55	1639.71	1639.63	NaN	19.0986	19.2155	19.157	408.086	515.627	1108.14	7101.1	0.514504	23.3666	Active	Unconsolidated Sediments	11	158055	10.6383	0	0
WIT2020_35	S266WTS035	35	Wittmann	2020	10.1016/j.earscirev.2020.103147	24700	1800	180000	31000	7.28745	0.187006	158	11.5	14.9	154	26.6	29.8	1.02597	0.187436	0.215263	0	0	23.6421	96.0869	17.0211	95.554	900.843	373246	NaN	745.09	745.12	745.105	NaN	18.2575	18.4393	18.3484	386.153	381.289	1728.63	11963.5	0.333072	56.7666	Active	Mixed Sedimentary Rocks	10	2383.45	0.638574	0	0
WIT2020_36	S266WTS036	36	Wittmann	2020	10.1016/j.earscirev.2020.103147	120000	4500	949000	115000	7.90833	0.12685	59.5	2.24	4.18	52.4	6.42	7.87	1.1355	0.128173	0.165809	2	0	18.8336	102.637	9.80437	106.046	802.249	772674	NaN	960.18	960.343	960.262	NaN	14.1444	13.6957	13.9201	300.593	314.19	1497.9	9280.23	0.343134	7.55593	Active	Mixed Sedimentary Rocks	12	15912.9	2.05946	0	0
WIT2020_37	S266WTS037	37	Wittmann	2020	10.1016/j.earscirev.2020.103147	48100	2300	399000	57000	8.29522	0.150647	96	4.6	7.31	82	11.8	13.8	1.17073	0.15167	0.184718	2	0	22.496	102.74	21.1373	105.304	874.345	51124.2	NaN	1133.13	1133.78	1133.46	NaN	32.8429	32.1625	32.5027	686.861	255.231	1447.58	10920.2	0.153021	22.8994	Active	Mixed Sedimentary Rocks	9	0	0	0	0
WIT2020_38	S266WTS038	38	Wittmann	2020	10.1016/j.earscirev.2020.103147	79400	3600	525000	87000	6.61209	0.171805	61.8	2.82	4.62	65.1	10.9	12.3	0.949309	0.173541	0.203192	0	0	22.9515	103.317	21.0374	105.862	869.269	137729	NaN	1136.37	1136.51	1136.44	NaN	29.4392	28.777	29.1081	619.221	288.925	1411.74	11024.7	0.196324	16.2323	Active	Mixed Sedimentary Rocks	10	0	0	0	0
WIT2020_39	S266WTS039	39	Wittmann	2020	10.1016/j.earscirev.2020.103147	150000	2300	1060000	90000	7.06667	0.0862791	25.1	0.389	1.55	24.5	2.13	3.03	1.02449	0.0883093	0.138234	0	0	24.2905	108.305	22.5483	113.179	918.175	399527	NaN	682.386	682.639	682.513	NaN	15.7255	14.1019	14.9137	341.002	199.658	1443.44	11540.7	0.227255	3.85463	Active	Carbonate Sedimentary Rocks	11	0	0	0	0
WIT2020_4	S266WTS004	4	Wittmann	2020	10.1016/j.earscirev.2020.103147	33900	1600	205000	29000	6.0472	0.149129	235	11.1	17.8	278	39.3	46	0.845324	0.149049	0.18198	1	0	59.9257	-125.552	61.8206	-121.279	891.686	275802	NaN	990.925	990.512	990.719	NaN	16.6502	17.2917	16.971	382.927	312.836	513.735	7411.66	0.423343	1.89607	Active	Siliciclastic Sedimentary Rocks	12	270406	98.0434	0	0
WIT2020_41	S266WTS041	41	Wittmann	2020	10.1016/j.earscirev.2020.103147	133000	41100	1024000	41000	7.69925	0.311606	233	72.2	73.5	205	8.24	19.5	1.13659	0.312467	0.32948	0	0	31.4044	97.6155	26.5531	101.854	592.026	387804	NaN	4096.79	4097.03	4096.91	NaN	28.884	28.0802	28.4821	600.992	403.723	573.778	5651.65	0.412135	36.0965	Active	Siliciclastic Sedimentary Rocks	12	95689.2	24.6747	0	0
WIT2020_42	S266WTS042	42	Wittmann	2020	10.1016/j.earscirev.2020.103147	384000	4300	3020000	165000	7.86458	0.0557715	59.5	0.669	3.59	51.8	2.86	5.34	1.14865	0.0563456	0.119448	2	2	30.8428	101.141	29.5957	106.653	658.402	841840	NaN	2863.67	2863.96	2863.81	NaN	28.9088	27.8491	28.379	602.391	417.44	761.534	7613.61	0.327473	26.793	Active	Siliciclastic Sedimentary Rocks	12	121957	14.4869	0	0
WIT2020_44	S266WTS044	44	Wittmann	2020	10.1016/j.earscirev.2020.103147	184000	31400	1010000	123000	5.48913	0.20965	65	11.1	11.8	79.9	9.81	12	0.813517	0.210325	0.235611	0	0	30.3791	107.639	31.9379	120.238	751.952	1.91341e+06	NaN	1500.04	1500.13	1500.08	NaN	19.9951	18.9554	19.4753	420.285	378.246	1019.6	9137.2	0.331312	12.0585	Active	Siliciclastic Sedimentary Rocks	12	121957	6.37379	0	0
WIT2020_45	S266WTS045	45	Wittmann	2020	10.1016/j.earscirev.2020.103147	106000	3700	490000	12000	4.62264	0.0426398	251	8.78	17.2	363	8.91	32.5	0.69146	0.0427327	0.112746	1	1	35.0725	100.937	36.0625	103.827	635.309	224699	NaN	3644.23	3644.16	3644.19	NaN	17.9831	17.0222	17.5026	375.413	227.959	513.007	5346.71	0.468215	20.4702	Active	Siliciclastic Sedimentary Rocks	12	59682.2	26.561	0	0
WIT2020_46	S266WTS046	46	Wittmann	2020	10.1016/j.earscirev.2020.103147	46500	1700	311000	63000	6.68817	0.205845	288	10.5	20	297	60.3	65.6	0.969697	0.206278	0.231535	0	0	36.8434	106.278	34.8043	111.237	747.003	726637	NaN	2052.88	2052.8	2052.84	NaN	11.8269	11.0946	11.4607	250.129	205.2	439.272	3792.67	0.636275	11.1521	Active	Unconsolidated Sediments	13	59682.2	8.21348	0	0
WIT2020_47	S266WTS047	47	Wittmann	2020	10.1016/j.earscirev.2020.103147	461000	15200	2900000	37000	6.29067	0.0353542	43.7	1.45	2.97	47.3	0.612	4.17	0.92389	0.0356142	0.111316	1	1	39.2215	99.5758	40.9712	100.221	718.763	58995	NaN	2503.01	2503.17	2503.09	NaN	17.6926	18.6866	18.1896	382.702	399.807	249.858	2155.1	0.676015	20.715	Active	Unconsolidated Sediments	11	7027.14	11.9114	0	0
WIT2020_48	S266WTS048	48	Wittmann	2020	10.1016/j.earscirev.2020.103147	519000	16400	2340000	74000	4.50867	0.0447055	5.32	0.178	0.376	8.11	0.275	0.798	0.65598	0.047637	0.121149	1	1	5.02539	22.9329	0.5707	17.8875	940.202	618738	NaN	619.771	619.797	619.784	NaN	2.90647	2.53049	2.71848	61.7401	33.7659	1541.44	9279.32	0.307357	0.0469487	Post-Orogenic	Metamorphic Rocks	4	0	0	0	0
WIT2020_49	S266WTS049	49	Wittmann	2020	10.1016/j.earscirev.2020.103147	110000	3900	510000	35000	4.63636	0.0772448	29.7	1.06	2.07	44.7	3.11	4.98	0.66443	0.078195	0.131414	1	1	-2.46634	23.0765	-4.30405	15.271	922.709	3.61897e+06	NaN	735.903	735.888	735.896	NaN	3.92367	3.62668	3.77517	83.6392	84.3855	1516.33	10102.8	0.300649	0.18071	Post-Orogenic	Metamorphic Rocks	7	0	0	0	0
WIT2020_5	S266WTS005	5	Wittmann	2020	10.1016/j.earscirev.2020.103147	36200	1900	186000	33000	5.13812	0.18502	192	10.1	15.2	268	47.7	53	0.716418	0.185596	0.213018	1	0	58.2267	-122.557	59.2704	-123.744	909.655	53274.5	NaN	828.055	827.464	827.759	NaN	13.0928	12.6161	12.8544	266.454	310.249	523.878	6818.28	0.513168	3.45505	Active	Siliciclastic Sedimentary Rocks	3	53274.5	100	0	0
WIT2020_50	S266WTS050	50	Wittmann	2020	10.1016/j.earscirev.2020.103147	231000	7800	1150000	72000	4.97835	0.0711337	11.1	0.386	0.777	15.5	1.01	1.71	0.716129	0.0738599	0.130656	1	1	13.864	3.49108	6.12097	6.75413	962.087	2.10814e+06	NaN	409.829	409.784	409.806	NaN	2.51763	2.53846	2.52805	56.6364	89.4251	627.22	2907.68	0.772175	0	Post-Orogenic	Metamorphic Rocks	8	0	0	0	0
WIT2020_51	S266WTS051	51	Wittmann	2020	10.1016/j.earscirev.2020.103147	338000	10900	2127000	154000	6.2929	0.0792596	12.8	0.423	0.881	13.8	1.04	1.62	0.927536	0.0822896	0.136081	0	0	-13.5808	22.8802	-17.5123	24.5272	880.518	335492	NaN	1165.62	1165.6	1165.61	NaN	1.96501	2.05975	2.01238	41.0977	39.026	1049.25	5701.11	0.609333	0	Post-Orogenic	Unconsolidated Sediments	4	0	0	0	0
WIT2020_53	S266WTS053	53	Wittmann	2020	10.1016/j.earscirev.2020.103147	1130000	35500	5440000	206000	4.81416	0.0492028	4.12	0.139	0.296	5.77	0.241	0.598	0.714038	0.0536916	0.126106	1	1	-24.9076	21.3678	-27.2459	20.384	879.158	308879	NaN	1172.44	1172.5	1172.47	NaN	0.88425	0.952122	0.918186	21.6526	35.551	316.538	1246.27	0.880608	0	Post-Orogenic	Unconsolidated Sediments	9	0	0	0	0
WIT2020_55	S266WTS055	55	Wittmann	2020	10.1016/j.earscirev.2020.103147	163800	7700	1457000	72000	8.89499	0.0682041	22	1.05	1.68	16.9	0.864	1.74	1.30178	0.0699398	0.128187	2	2	9.75154	31.8802	19.6656	30.4042	907.891	2.61255e+06	NaN	802.071	802.088	802.079	NaN	3.89864	3.97301	3.93583	86.1155	155.93	730.9	3752.09	0.723746	1.27175	Active	Unconsolidated Sediments	8	0	0	0	0
WIT2020_56	S266WTS056	56	Wittmann	2020	10.1016/j.earscirev.2020.103147	226000	7400	1390000	121000	6.15044	0.0930048	15.5	0.516	1.06	17.2	1.55	2.18	0.901163	0.0960687	0.144017	1	0	11.4421	31.9492	31.3379	30.5125	913.322	2.94588e+06	NaN	750.665	750.697	750.681	NaN	3.77982	3.8467	3.81326	84.1013	148.836	643.86	3303.82	0.724424	1.15567	Active	Metamorphic Rocks	9	0	0	0	0
WIT2020_57	S266WTS057	57	Wittmann	2020	10.1016/j.earscirev.2020.103147	327000	10500	1610000	93000	4.92355	0.0660888	15.1	0.494	1.03	21	1.25	2.23	0.719048	0.0679218	0.126211	1	1	-16.8589	18.3255	-18.2457	21.7787	864.138	231779	NaN	1317.51	1317.49	1317.5	NaN	2.29001	2.45532	2.37267	47.8991	45.3793	735.754	3495.56	0.814771	0	Post-Orogenic	Unconsolidated Sediments	8	0	0	0	0
WIT2020_58	S266WTS058	58	Wittmann	2020	10.1016/j.earscirev.2020.103147	779300	26200	5000000	251000	6.41601	0.060418	5.34	0.19	0.383	5.49	0.305	0.606	0.972678	0.0659727	0.131638	0	0	-23.1874	27.6623	-22.2369	30.0207	894.685	203140	NaN	1022.91	1023.04	1022.98	NaN	3.14018	3.30087	3.22053	70.6126	77.0825	485.711	2259.74	0.951877	0	Post-Orogenic	Metamorphic Rocks	11	0	0	0	0
WIT2020_59	S266WTS059	59	Wittmann	2020	10.1016/j.earscirev.2020.103147	621700	19500	2950000	169000	4.74505	0.0653126	4.33	0.145	0.31	6.29	0.395	0.712	0.688394	0.0711688	0.133936	1	1	-31.5142	146.96	-35.1703	139.312	975.082	855306	290.653	294.743	294.757	294.75	3.39076	3.03613	3.00425	3.14372	65.9771	110.754	531.098	2842.14	0.842578	0	Post-Orogenic	Unconsolidated Sediments	13	0	0	0	0
WIT2020_6	S266WTS006	6	Wittmann	2020	10.1016/j.earscirev.2020.103147	33900	1500	170000	18000	5.01475	0.114756	112	4.99	8.32	161	17.1	22.1	0.695652	0.115177	0.156079	1	1	45.1593	-84.1982	45.0207	-74.6541	981.689	778426	NaN	261.148	260.143	260.646	NaN	1.84265	1.74843	1.79554	40.694	48.1931	873.188	9461.88	0.300269	0	Post-Orogenic	Siliciclastic Sedimentary Rocks	12	778426	100	0	0
WIT2020_7	S266WTS007	7	Wittmann	2020	10.1016/j.earscirev.2020.103147	116000	1300	859000	71000	7.40517	0.0834105	92.6	1.04	5.58	87.6	7.29	10.5	1.05708	0.0839736	0.134158	0	0	42.9394	-114.303	44.0457	-116.962	822.52	134420	NaN	1664	1662.91	1663.45	NaN	11.0428	11.3792	11.211	237.215	221.234	372.267	2679.89	0.442729	5.74893	Active	Basic Volcanic Rocks	12	7682.89	5.71559	0	0
WIT2020_8	S266WTS008	8	Wittmann	2020	10.1016/j.earscirev.2020.103147	89800	9300	625000	78000	6.95991	0.162174	107	11.1	12.8	108	13.6	16.5	0.990741	0.163153	0.19404	0	0	46.5116	-116.369	45.854	-119.707	847.291	546583	NaN	1400.04	1399.05	1399.54	NaN	22.9474	22.7046	22.826	471.466	350.884	574.797	5381.81	0.322939	5.64221	Active	Siliciclastic Sedimentary Rocks	12	138264	25.296	0	0
WIT2020_9	S266WTS009	9	Wittmann	2020	10.1016/j.earscirev.2020.103147	168000	6400	928000	142000	5.52381	0.157688	84.4	3.23	5.95	105	16.2	18.6	0.80381	0.158961	0.190655	1	0	41.0874	-107.77	40.5621	-108.412	778.281	10294.8	NaN	2156.87	2155.47	2156.17	NaN	8.08612	8.48075	8.28344	174.108	122.711	316.412	2225.47	0.591356	1.01921	Active	Siliciclastic Sedimentary Rocks	10	0	0	0	0
YAN2021_DSC-RB	S294WTS001	DSC-RB	Yang	2021	10.1007/s11430-020-9744-6	203900	6200	1363000	49000	6.68465	0.047085	34.9	1.07	2.34	36	1.31	3.41	0.969444	0.0475828	0.116051	0	0	27.2034	105.199	27.2139	105.222	825.595	18.6447	1719.99	1715.08	1711.58	1713.33	26.1362	14.9556	9.19921	16.7637	319.52	51.1593	1033.74	10267.3	0.160871	0.0205472	Post-Orogenic	Mixed Sedimentary Rocks	1	0	0	0	0
YAN2021_MDC-RB	S294WTS002	MDC-RB	Yang	2021	10.1007/s11430-020-9744-6	200800	6500	1341000	48000	6.67829	0.0482605	22.4	0.736	1.53	23.2	0.85	2.21	0.965517	0.0492131	0.117216	0	0	27.9255	107.124	27.9051	107.149	898.499	256.456	1121.79	1004.35	1003.87	1004.11	28.6635	18.2389	15.9653	20.9559	368.416	123.359	1086.31	10550.1	0.190166	0	Post-Orogenic	Carbonate Sedimentary Rocks	2	0	0	0	0
YAN2021_SXC-RB	S294WTS003	SXC-RB	Yang	2021	10.1007/s11430-020-9744-6	101300	3500	603000	24000	5.95262	0.0527056	76.3	2.65	5.24	87.8	3.52	8.38	0.869021	0.053043	0.117584	1	1	27.209	104.731	27.1507	104.941	806.124	3084.88	1892.53	1896.75	1896.78	1896.76	27.6701	20.6622	17.2091	21.8471	429.362	105.711	985.35	9831.07	0.14289	0.493495	Post-Orogenic	Mixed Sedimentary Rocks	4	0	0	0	0
YAN2021_YTGC-RB	S294WTS004	YTGC-RB	Yang	2021	10.1007/s11430-020-9744-6	88300	3400	503000	21000	5.69649	0.0567949	76.8	2.97	5.43	92.4	3.88	8.89	0.831169	0.0570858	0.119397	1	1	27.1254	105.226	27.1043	105.204	826.231	24.2786	1850.08	1701.19	1709.3	1705.24	28.0769	17.4511	16.1937	20.5739	394.443	53.2441	1040.03	10208.4	0.182501	5.69433e-05	Post-Orogenic	Mixed Sedimentary Rocks	1	0	0	0	0
ZHA2021_M1	S293WTS012	M1	Zhang	2021	10.1002/esp.5105	293300	10400	1975200	50400	6.7344	0.0436852	99.5	3.54	6.87	99.2	2.55	8.95	1.00302	0.0438927	0.11361	0	0	29.7038	94.6962	29.8401	94.7548	606.77	602.089	4217.7	4210.6	4210.24	4210.42	37.4122	40.406	40.1154	39.3112	820.073	232.289	640.158	6565.75	0.34564	14.9681	Active	Metamorphic Rocks	3	194.71	32.339	3.8	0.62
ZHA2021_M10	S293WTS022	M10	Zhang	2021	10.1002/esp.5105	503200	14500	3760100	117200	7.47238	0.0424484	73.1	2.11	4.82	66	2.07	6.09	1.10758	0.0426244	0.113411	2	2	29.1987	92.9245	29.1078	93.4492	574.91	8604.09	4613.43	4608.54	4609.04	4608.79	46.1892	48.3168	46.4609	46.989	999.967	319.017	395.956	3718.19	0.425575	24.3221	Active	Mixed Sedimentary Rocks	9	3710.95	43.1301	170.9	1.99
ZHA2021_M2	S293WTS013	M2	Zhang	2021	10.1002/esp.5105	210800	7100	1467500	41800	6.96157	0.0441107	133	4.47	9.03	128	3.67	11.7	1.03906	0.0441774	0.113863	0	0	29.7233	94.7023	29.8748	94.7787	608.47	676.584	4195.23	4187.18	4187.83	4187.5	38.7625	41.8357	41.5574	40.7185	852.076	255.8	641.245	6561.27	0.344105	13.5101	Active	Metamorphic Rocks	3	241.835	35.7436	7.8	1.15
ZHA2021_M3	S293WTS015	M3	Zhang	2021	10.1002/esp.5105	49900	6600	271200	16700	5.43487	0.145896	545	72.1	78.9	670	41.3	71	0.813433	0.14595	0.179411	1	0	29.8974	94.619	29.9968	94.8835	600.92	2680.96	4269.87	4245.15	4246.1	4245.63	49.4297	54.9493	53.4471	52.6087	1130.58	391.734	648.562	6855.85	0.31492	6.66601	Active	Siliciclastic Sedimentary Rocks	3	1557.63	58.0997	265	9.89
ZHA2021_M3*	S293WTS014	M3*	Zhang	2021	10.1002/esp.5105	51000	8700	364300	24700	7.14314	0.183568	533	91	96.3	502	34.1	55.1	1.06175	0.183749	0.211403	0	0	29.8974	94.619	29.9968	94.8835	600.92	2680.96	4269.87	4245.15	4246.1	4245.63	49.4297	54.9493	53.4471	52.6087	1130.58	391.734	648.562	6855.85	0.31492	6.66601	Active	Siliciclastic Sedimentary Rocks	3	1557.63	58.0997	265	9.89
ZHA2021_M4	S293WTS016	M4	Zhang	2021	10.1002/esp.5105	20600	4900	78100	7200	3.79126	0.255104	1490	355	366	2520	232	317	0.59127	0.255423	0.275974	1	0	30.2277	94.7877	30.0705	95.0501	573.73	23448.5	4598.09	4567.74	4567.25	4567.5	51.3252	57.5779	57.371	55.4247	1206.91	394.52	677.293	7814.73	0.283584	11.0968	Active	Acid Plutonic Rocks	7	20890.3	89.0901	5481.5	23.38
ZHA2021_M5	S293WTS017	M5	Zhang	2021	10.1002/esp.5105	69200	7600	115000	17300	1.66185	0.186259	425	46.7	53	1610	242	278	0.263975	0.186192	0.212995	1	1	30.0292	95.7923	30.0986	95.0731	589.77	9969.43	4389.66	4365.49	4365.31	4365.4	50.7018	61.8481	62.6691	58.4063	1265.63	356.334	684.719	7842.43	0.239755	18.5317	Active	Acid Plutonic Rocks	7	9399.78	94.286	1990	19.96
ZHA2021_M6	S293WTS018	M6	Zhang	2021	10.1002/esp.5105	19600	4600	73600	6700	3.7551	0.25173	1670	391	404	2840	258	355	0.588028	0.251138	0.272302	1	0	30.5725	94.0471	30.1028	95.0694	563.65	13459.6	4755.91	4719.97	4719.41	4719.69	51.7584	54.3834	53.4074	53.1831	1162.77	415.005	671.681	7796.41	0.320141	5.49108	Active	Siliciclastic Sedimentary Rocks	5	11490.5	85.3701	3491.6	25.94
ZHA2021_M7	S293WTS019	M7	Zhang	2021	10.1002/esp.5105	62800	4600	387000	15000	6.16242	0.0828712	556	40.7	52.3	600	23.3	56.7	0.926667	0.0828642	0.133336	0	0	29.5625	96.4659	29.5995	96.3707	558.5	573.652	4854.75	4722.77	4723.09	4722.93	33.9407	58.7271	61.858	51.5086	1196.56	344.027	675.481	8633.98	0.237653	34.4161	Active	Acid Plutonic Rocks	4	525.477	91.6019	156.6	27.3
ZHA2021_M8	S293WTS020	M8	Zhang	2021	10.1002/esp.5105	148500	17100	203700	27300	1.37172	0.176696	213	24.6	27.6	981	131	156	0.217125	0.176553	0.20513	1	1	29.847	94.1231	29.4402	95.4065	582.38	66505.9	4472.5	4452.58	4452.7	4452.64	49.5948	54.0746	53.0239	52.2311	1127.34	388.45	602.447	6407.61	0.343936	17.5047	Active	Acid Plutonic Rocks	11	45773.2	68.8257	8106.3	12.19
ZHA2021_M9	S293WTS021	M9	Zhang	2021	10.1002/esp.5105	302700	17500	2099800	50800	6.9369	0.0626709	135	7.83	11.2	130	3.16	11.7	1.03846	0.0628877	0.122404	0	0	29.6247	96.6973	29.5828	96.7471	547.12	212.115	5010.99	4996.68	5000.19	4998.44	41.9219	45.5407	39.5626	42.3417	816.036	126.33	655.423	8624.69	0.193041	30.3271	Active	Mixed Sedimentary Rocks	5	212.115	100	33.7	15.87
ZHA2021_T10	S293WTS010	T10	Zhang	2021	10.1002/esp.5105	49700	2300	333200	16900	6.70423	0.0686598	676	31.3	50.7	674	34.2	67.3	1.00297	0.068692	0.124881	0	0	29.7285	96.3933	29.6189	96.3398	564.56	284.421	4791.19	4763.5	4767.57	4765.54	46.5572	51.0204	46.0023	47.86	1010.76	169.866	668.11	8520.12	0.226962	25.1776	Active	Acid Plutonic Rocks	3	239.715	84.2818	39.5	13.9
ZHA2021_T11	S293WTS011	T11	Zhang	2021	10.1002/esp.5105	199800	6800	1442400	42800	7.21922	0.0451529	193	6.58	13.2	179	5.33	16.3	1.07821	0.0452658	0.113885	2	0	29.569	96.582	29.5188	96.5963	550.04	146.139	5025.84	4987.74	4967.38	4977.56	42.3515	46.5987	41.5072	43.4858	872.561	179.45	665.713	8805.89	0.212292	47.0594	Active	Acid Plutonic Rocks	2	105.089	71.9102	18.7	12.8
ZHA2021_T2	S293WTS002	T2	Zhang	2021	10.1002/esp.5105	238400	8000	1838300	53000	7.71099	0.0442414	126	4.23	8.56	111	3.22	10.1	1.13514	0.0443685	0.113555	2	2	29.8105	94.6632	29.7673	94.7376	598.68	80.7215	4312.33	4303.96	4317.02	4310.49	39.6742	40.8612	32.9829	37.8394	769.637	218.5	638.917	6718.38	0.336256	5.70388	Active	Siliciclastic Sedimentary Rocks	3	7.1738	8.88711	0	0
ZHA2021_T3	S293WTS003	T3	Zhang	2021	10.1002/esp.5105	38300	2700	215200	15100	5.6188	0.0994643	728	51.3	66.9	864	60.7	96	0.842593	0.0995054	0.144189	1	0	30.0197	94.5429	29.9492	94.8	596.11	1687.73	4341.73	4309.41	4313.67	4311.54	52.2487	57.6832	54.5036	54.8119	1163.36	354.66	648.544	6965.46	0.30744	4.21815	Active	Siliciclastic Sedimentary Rocks	2	1042.59	61.7745	173.3	10.27
ZHA2021_T4	S293WTS004	T4	Zhang	2021	10.1002/esp.5105	17200	1600	113000	11900	6.56977	0.140511	1470	137	162	1510	159	205	0.97351	0.140618	0.17486	0	0	29.9717	95.4197	29.9338	95.4042	603.88	21.1862	4216.68	4178.15	4213.45	4195.8	58.4545	69.0666	72.1291	66.5501	1491.46	245.888	683.714	7509.68	0.317752	19.8137	Active	Siliciclastic Sedimentary Rocks	3	21.1862	100	4.4	20.58
ZHA2021_T5	S293WTS005	T5	Zhang	2021	10.1002/esp.5105	36900	2100	243700	10400	6.60434	0.0711337	669	38.1	54.8	682	29.1	65.6	0.980938	0.0711617	0.12634	0	0	29.9341	95.5213	29.899	95.5171	615.59	21.0865	4099.8	4074.74	4104.9	4089.82	57.3355	73.8139	84.5654	71.9049	1549.61	266.436	698.407	7370.3	0.321637	9.82577	Active	Acid Plutonic Rocks	2	21.0865	100	5.1	24.23
ZHA2021_T6	S293WTS006	T6	Zhang	2021	10.1002/esp.5105	23300	1900	175600	10300	7.53648	0.10045	976	79.6	98.3	879	51.6	91.6	1.11035	0.100487	0.144926	2	0	29.6928	95.6522	29.7089	95.5812	624.98	252.115	3969.81	3951.68	3955.77	3953.73	54.1062	70.0953	70.9809	65.0608	1367.2	215.918	718.859	7649.04	0.277842	9.37227	Active	Metamorphic Rocks	2	250.373	99.3092	24.6	9.77
ZHA2021_T7	S293WTS007	T7	Zhang	2021	10.1002/esp.5105	33200	2200	236500	12500	7.12349	0.0847621	845	56	75	798	42.2	80.7	1.0589	0.0847852	0.134554	0	0	29.8679	95.8913	29.8047	95.8676	593	64.978	4385.26	4257.53	4281.29	4269.41	51.1426	63.4819	60.1729	58.2658	1297.1	226.197	685.736	7937.86	0.265863	27.7077	Active	Acid Plutonic Rocks	1	33.0592	50.8775	17.1	26.35
ZHA2021_T8	S293WTS008	T8	Zhang	2021	10.1002/esp.5105	52900	4500	265100	15600	5.01134	0.103436	584	49.7	60.5	773	45.5	80.6	0.755498	0.103475	0.146984	1	1	30.0093	96.0738	29.7547	96.094	580.45	1484.68	4553.47	4551.07	4548.69	4549.88	50.3496	55.9946	54.253	53.5324	1134.28	305.344	668.121	7823.19	0.22267	25.7238	Active	Acid Plutonic Rocks	6	1433.75	96.5695	134.4	9.05
ZHA2021_T9	S293WTS009	T9	Zhang	2021	10.1002/esp.5105	48000	5500	273000	14200	5.6875	0.125837	691	79.2	89	806	41.9	81	0.85732	0.125855	0.163367	1	0	29.775	96.3055	29.6334	96.277	566.94	314.791	4751.96	4734.85	4735.36	4735.11	51.6268	58.7671	56.0365	55.4768	1204.76	217.909	667.048	8370.73	0.227619	22.5886	Active	Mixed Sedimentary Rocks	3	297.821	94.6092	60.5	19.2
ZHA2022_M1	S310WTS013	M1	Zhang	2022	10.1007/s11442-022-1950-4	1501000	49000	10560000	310000	7.03531	0.0439029	32.8	1.08	2.23	30.9	0.924	2.86	1.06149	0.0444788	0.114844	2	0	29.8564	84.4556	29.1773	87.6739	546.29	52661.2	5080.68	5075.87	5075.76	5075.81	22.279	23.0652	22.5226	22.6223	481.489	247.149	266.807	2421.75	0.50654	25.4495	Active	Mixed Sedimentary Rocks	9	12897.4	24.4913	1165	2.21
ZHA2022_M2	S310WTS014	M2	Zhang	2022	10.1007/s11442-022-1950-4	1327000	39000	8970000	240000	6.75961	0.0397445	36.8	1.09	2.45	36.1	0.98	3.3	1.01939	0.040178	0.113087	0	0	29.8636	85.2445	29.3623	88.126	545.84	74113.2	5093.01	5088.93	5088.93	5088.93	24.9713	25.1809	24.1967	24.783	520.226	257.092	257.529	2292.59	0.501212	21.9834	Active	Mixed Sedimentary Rocks	9	17789.8	24.0036	1259	1.7
ZHA2022_M3	S310WTS015	M3	Zhang	2022	10.1007/s11442-022-1950-4	653000	22000	4400000	130000	6.73813	0.0448107	66.8	2.26	4.56	65.9	1.96	6.05	1.01366	0.0450468	0.114404	0	0	29.499	87.0383	29.3224	90.6731	551.79	127446	4987.95	4983.84	4983.81	4983.83	26.5068	26.6462	25.8923	26.3485	553.576	268.42	269.255	2321.69	0.491437	24.2435	Active	Mixed Sedimentary Rocks	10	26864.4	21.079	1868.9	1.47
ZHA2022_T1	S310WTS001	T1	Zhang	2022	10.1007/s11442-022-1950-4	2260000	75000	20260000	500000	8.9646	0.0413565	23.9	0.802	1.64	17.7	0.451	1.64	1.35028	0.0421341	0.115298	2	2	29.7151	85.062	29.3296	85.1589	534.33	5734.56	5272.66	5270.06	5269.99	5270.03	25.2187	26.1389	25.706	25.6879	538.626	200.86	210.966	1905.54	0.502925	18.5243	Active	Mixed Sedimentary Rocks	7	2425.63	42.2985	121.7	2.12
ZHA2022_T10	S310WTS010	T10	Zhang	2022	10.1007/s11442-022-1950-4	228000	7000	1440000	50000	6.31579	0.046349	148	4.55	9.85	155	5.42	14.5	0.954839	0.0465606	0.114807	0	0	29.5971	93.8026	29.7715	93.8969	576.49	552.86	4620.12	4617.74	4615.88	4616.81	48.7121	48.1304	43.2338	46.6921	922.831	253.991	548.073	5741.36	0.408327	18.2683	Active	Acid Plutonic Rocks	2	423.88	76.6704	12	2.17
ZHA2022_T11	S310WTS011	T11	Zhang	2022	10.1007/s11442-022-1950-4	352000	12000	2700000	80000	7.67045	0.0451675	98.1	3.35	6.7	86.8	2.59	7.95	1.13018	0.0453486	0.114251	2	2	29.6071	93.9927	29.7467	94.0103	580.54	399.891	4565.09	4562.11	4558.72	4560.42	48.3129	48.1052	39.8548	45.4243	907.599	232.465	567.791	5970.14	0.395601	13.6204	Active	Acid Plutonic Rocks	1	349.327	87.3556	2.1	0.53
ZHA2022_T12	S310WTS012	T12	Zhang	2022	10.1007/s11442-022-1950-4	983000	32000	6860000	170000	6.97864	0.0409126	43.1	1.41	2.93	41.2	1.04	3.74	1.04612	0.0413212	0.11341	2	0	30.0182	93.3243	29.757	94.2199	565.85	15798.6	4753.75	4741.52	4742.24	4741.88	49.7669	50.8219	46.8579	49.1489	1030.15	318.832	551.605	5814.63	0.391978	21.3629	Active	Siliciclastic Sedimentary Rocks	10	12140.9	76.8482	1316	8.33
ZHA2022_T2	S310WTS002	T2	Zhang	2022	10.1007/s11442-022-1950-4	1495000	44000	9850000	180000	6.58863	0.0346432	33.6	0.997	2.23	33.6	0.626	3.01	1	0.0350368	0.11149	0	0	29.798	87.14	29.3949	87.9569	542.31	20199	5157.25	5154.43	5154.55	5154.49	31.2845	30.092	27.9021	29.7596	608.335	254.899	228.855	1944.71	0.49141	12.7161	Active	Acid Volcanic Rocks	7	4845.57	23.9891	94	0.47
ZHA2022_T3	S310WTS003	T3	Zhang	2022	10.1007/s11442-022-1950-4	1081000	33000	7280000	190000	6.73451	0.040163	42.9	1.32	2.87	42.2	1.12	3.85	1.01659	0.0406341	0.113132	0	0	29.6734	88.5614	29.364	88.5675	550.87	2411.08	5022.51	5021.36	5021.18	5021.27	34.4657	33.3667	32.2023	33.3449	690.283	223.128	269.516	2259.87	0.469693	10.8854	Active	Acid Plutonic Rocks	7	735.975	30.5248	13.2	0.55
ZHA2022_T4	S310WTS004	T4	Zhang	2022	10.1007/s11442-022-1950-4	1042000	32000	7220000	190000	6.92898	0.040443	45.9	1.42	3.07	44	1.17	4.01	1.04318	0.0407942	0.113046	2	0	29.8796	89.1933	29.4484	89.0902	546.03	7302.34	5085.77	5082.82	5083.04	5082.93	39.3203	37.1937	33.8121	36.7754	748.861	202.626	296.643	2555.96	0.488195	19.8703	Active	Acid Volcanic Rocks	8	1632.57	22.3568	56.4	0.77
ZHA2022_T5	S310WTS005	T5	Zhang	2022	10.1007/s11442-022-1950-4	1077000	32000	6890000	190000	6.3974	0.0405371	42.2	1.26	2.81	43.6	1.22	3.99	0.96789	0.0409202	0.113175	0	0	29.6339	89.6815	29.362	89.6373	553.73	1600.38	4964.11	4962.75	4961.51	4962.13	33.9846	32.6951	31.1666	32.6154	666.227	257.557	290.915	2505.53	0.496354	25.8597	Active	Acid Plutonic Rocks	6	174.168	10.8829	1.3	0.08
ZHA2022_T6	S310WTS006	T6	Zhang	2022	10.1007/s11442-022-1950-4	1155000	31000	7740000	170000	6.7013	0.0346812	39.7	1.07	2.6	39.3	0.876	3.54	1.01018	0.0349752	0.111368	0	0	29.6647	90.1071	29.3715	90.18	553.24	2370.3	4964.04	4959.68	4960.93	4960.3	31.359	31.9624	32.4379	31.9197	673.746	237.226	301.01	2586.39	0.506017	36.0792	Active	Acid Plutonic Rocks	8	710.197	29.9623	28.6	1.21
ZHA2022_T7	S310WTS007	T7	Zhang	2022	10.1007/s11442-022-1950-4	497000	15000	3620000	110000	7.2837	0.0428282	86.5	2.62	5.75	79.8	2.44	7.33	1.08396	0.0430389	0.113385	2	0	30.3986	91.9453	29.8086	91.582	552.88	22824.3	4973.37	4970.64	4970.77	4970.7	35.2101	32.717	27.8562	31.9278	650.871	249.09	457.727	4490.27	0.46477	18.1539	Active	Siliciclastic Sedimentary Rocks	9	9049.65	39.6491	339.8	1.49
ZHA2022_T9	S310WTS009	T9	Zhang	2022	10.1007/s11442-022-1950-4	274000	9000	2000000	60000	7.29927	0.0444849	145	4.76	9.79	133	4.01	12.2	1.09023	0.0445724	0.113898	2	2	30.31	93.0457	30.0115	93.0788	554.77	1859.41	4931.73	4928.13	4929.72	4928.93	48.9656	47.8218	41.3407	46.0427	961.887	256.196	583.974	6260.44	0.387679	29.5303	Active	Acid Plutonic Rocks	4	1631.42	87.7386	95.8	5.15
[truncated: 5 more columns]

## Sheet: Standard Corrections
Unique ID	Source ID	AUTHOR	PUBYEAR	DOI	Originally reported Be-10 Concentration (atoms/g)	Originally reported Be-10 Concentration Uncertainty (atoms/g)	Be AMS Standard	Be Standard Correction Coefficient	AMS (Be)	Normalized Be-10 Concentration (atoms/g)	Normalized Be-10 Concentration Uncertainty (atoms/g)	Originally reported Al-26 Concentration (atoms/g)	Originally reported Al-26 Concentration Uncertainty (atoms/g)	Al AMS Standard	Al Standard Correction Coefficient	AMS (Al)	Normalized Al-26 Concentration (atoms/g)	Normalized Al-26 Concentration Uncertainty (atoms/g)
ADA2018_WA1501	WA1501	Adams	2018	10.5194/esurf-6-595-2018	11738	633	07KNSTD	1	Cologne	11738	633	74391	6678	KNSTD	1	Cologne	74391	6678	RIE2000_FR-9
ADA2018_WA1502	WA1502	Adams	2018	10.5194/esurf-6-595-2018	9324	527	07KNSTD	1	Cologne	9324	527	48421	7135	KNSTD	1	Cologne	48421	7135	RIE2000_AL-3
ADA2018_WA1503	WA1503	Adams	2018	10.5194/esurf-6-595-2018	6934	445	07KNSTD	1	Cologne	6934	445	38878	6227	KNSTD	1	Cologne	38878	6227	DET2014_MJ-BC-17
ADA2018_WA1519	WA1519	Adams	2018	10.5194/esurf-6-595-2018	2980	288	07KNSTD	1	Cologne	2980	288	10783	3104	KNSTD	1	Cologne	10783	3104	MND2023_RK33
ADA2018_WA1520	WA1520	Adams	2018	10.5194/esurf-6-595-2018	10906	583	07KNSTD	1	Cologne	10906	583	73333	10379	KNSTD	1	Cologne	73333	10379	MAT2014_As-5
ADA2018_WA1522	WA1522	Adams	2018	10.5194/esurf-6-595-2018	15665	1129	07KNSTD	1	Cologne	15665	1129	132290	9907	KNSTD	1	Cologne	132290	9907	MND2023_RK39
ADA2018_WA1523	WA1523	Adams	2018	10.5194/esurf-6-595-2018	3844	345	07KNSTD	1	Cologne	3844	345	10539	2435	KNSTD	1	Cologne	10539	2435	REU2015_SAP44
ADA2018_WA1524	WA1524	Adams	2018	10.5194/esurf-6-595-2018	2573	255	07KNSTD	1	Cologne	2573	255	21763	4289	KNSTD	1	Cologne	21763	4289	MND2023_RK16
ADA2018_WA1525	WA1525	Adams	2018	10.5194/esurf-6-595-2018	5625	397	07KNSTD	1	Cologne	5625	397	26581	4208	KNSTD	1	Cologne	26581	4208	STR2018_NEA4
ADA2018_WA1526	WA1526	Adams	2018	10.5194/esurf-6-595-2018	19765	845	07KNSTD	1	Cologne	19765	845	111196	11661	KNSTD	1	Cologne	111196	11661	MND2023_RK19
ADA2018_WA1527	WA1527	Adams	2018	10.5194/esurf-6-595-2018	11048	596	07KNSTD	1	Cologne	11048	596	80390	9617	KNSTD	1	Cologne	80390	9617	RIE2000_FR-7
ADA2018_WA1537	WA1537	Adams	2018	10.5194/esurf-6-595-2018	5010	376	07KNSTD	1	Cologne	5010	376	33985	3912	KNSTD	1	Cologne	33985	3912	NIC2014_QLD 4
ADA2018_WA1538	WA1538	Adams	2018	10.5194/esurf-6-595-2018	11742	603	07KNSTD	1	Cologne	11742	603	71021	6160	KNSTD	1	Cologne	71021	6160	MAT2003_GSRF-8
ADA2018_WA1539	WA1539	Adams	2018	10.5194/esurf-6-595-2018	21267	915	07KNSTD	1	Cologne	21267	915	145691	13348	KNSTD	1	Cologne	145691	13348	CAM2022_CU-122
BAL2005_STR-1-C	STR-1-C	Balco	2005	10.1002/es.1262	69000	5000	LLNL3000	0.8644	LLNL-CAMS	59643.6	4322	412000	28000	KNSTD	1	LLNL-CAMS	412000	28000	COX2009_MRC-05
BAL2005_STR-2W-M	STR-2W-M	Balco	2005	10.1002/es.1262	85000	3000	LLNL3000	0.8644	LLNL-CAMS	73474	2593.2	493000	35000	KNSTD	1	LLNL-CAMS	493000	35000	NIC2014_QLD 11
BEN2022_CRER	CRER	Ben-Israel	2022	10.1029/2021JF006417	98901.1	9586.99	07KNSTD	1	ASTER	98901.1	9586.99	651061	158076	KNSTD	1	ASTER	651061	158076	REU2015_SAP65
BEN2022_CRND	CRND	Ben-Israel	2022	10.1029/2021JF006417	97513.3	9452.46	07KNSTD	1	ASTER	97513.3	9452.46	578916	140559	KNSTD	1	ASTER	578916	140559	REU2015_SAP15
BEN2022_CRPD	CRPD	Ben-Israel	2022	10.1029/2021JF006417	285182	14845	07KNSTD	1	ASTER	285182	14845	1.51418e+06	367637	KNSTD	1	ASTER	1.51418e+06	367637	NIC2014_QLD 2
BEN2022_CRTC	CRTC	Ben-Israel	2022	10.1029/2021JF006417	171361	8869.64	07KNSTD	1	ASTER	171361	8869.64	906200	220023	KNSTD	1	ASTER	906200	220023	STR2018_PEA1
BEN2022_CRWB	CRWB	Ben-Israel	2022	10.1029/2021JF006417	116997	9831.5	07KNSTD	1	ASTER	116997	9831.5	666770	161890	KNSTD	1	ASTER	666770	161890	POR2019_POT51
BEN2022_CRYM	CRYM	Ben-Israel	2022	10.1029/2021JF006417	132920	12660	07KNSTD	1	ASTER	132920	12660	755257	183374	KNSTD	1	ASTER	755257	183374	NIC2011_GCSC-190
BIE2001_NAM-08	NAM-08	Bierman	2001	10.2475/ajs.301.4-5.326	1840000	50000	KNSTD	0.9042	LLNL-CAMS	1663728	45210	9880000	530000	ND	1	LLNL-CAMS	9880000	530000	COD2021_LOC-SCS
BIE2001_NAM-09	NAM-09	Bierman	2001	10.2475/ajs.301.4-5.326	570000	20000	KNSTD	0.9042	LLNL-CAMS	515394	18084	2960000	330000	ND	1	LLNL-CAMS	2960000	330000	POR2019_POT48
BIE2001_NAM-16	NAM-16	Bierman	2001	10.2475/ajs.301.4-5.326	830000	20000	KNSTD	0.9042	LLNL-CAMS	750486	18084	4360000	230000	ND	1	LLNL-CAMS	4360000	230000	CAZ2019_CRSG1.s
BIE2001_NAM-43	NAM-43	Bierman	2001	10.2475/ajs.301.4-5.326	720000	20000	KNSTD	0.9042	LLNL-CAMS	651024	18084	4.06e+06	210000	ND	1	LLNL-CAMS	4.06e+06	210000	SCH2016_CH-066
BIE2001_NAM-46	NAM-46	Bierman	2001	10.2475/ajs.301.4-5.326	950000	30000	KNSTD	0.9042	LLNL-CAMS	858990	27126	5250000	240000	ND	1	LLNL-CAMS	5250000	240000	POR2019_POT42
BIE2001_NAM-52	NAM-52	Bierman	2001	10.2475/ajs.301.4-5.326	2950000	80000	KNSTD	0.9042	LLNL-CAMS	2667390	72336	15470000	670000	ND	1	LLNL-CAMS	15470000	670000	REU2015_SAP68
BIE2001_NAM-57	NAM-57	Bierman	2001	10.2475/ajs.301.4-5.326	810000	30000	KNSTD	0.9042	LLNL-CAMS	732402	27126	4680000	280000	ND	1	LLNL-CAMS	4680000	280000	BUT2007_SA04-35-1
BIE2005_RP-1	RP-1	Bierman	2005	10.1002/esp.1255	290000	9000	KNSTD	0.9042	LLNL-CAMS	262218	8137.8	1280000	70000	ND	1	LLNL-CAMS	1280000	70000	MAS2018_PAN12
BIE2005_RP-10	RP-10	Bierman	2005	10.1002/esp.1255	317000	16000	KNSTD	0.9042	LLNL-CAMS	286631	14467.2	1800000	100000	ND	1	LLNL-CAMS	1800000	100000	POR2019_POT30
BIE2005_RP-14A	RP-14A	Bierman	2005	10.1002/esp.1255	304000	9000	KNSTD	0.9042	LLNL-CAMS	274877	8137.8	1760000	120000	ND	1	LLNL-CAMS	1760000	120000	CAM2022_CU-132
BIE2005_RP-14B	RP-14B	Bierman	2005	10.1002/esp.1255	268000	8000	KNSTD	0.9042	LLNL-CAMS	242326	7233.6	1680000	90000	ND	1	LLNL-CAMS	1680000	90000	YAN2021_YTGC-RB
BIE2005_RP-18	RP-18	Bierman	2005	10.1002/esp.1255	2400000	60000	KNSTD	0.9042	LLNL-CAMS	2170080	54252	13610000	640000	ND	1	LLNL-CAMS	13610000	640000	FER2014_LO18-4
BIE2005_RP-19	RP-19	Bierman	2005	10.1002/esp.1255	111000	4000	KNSTD	0.9042	LLNL-CAMS	100366	3616.8	610000	40000	ND	1	LLNL-CAMS	610000	40000	SOS2016_GLOR
BIE2005_RP-2	RP-2	Bierman	2005	10.1002/esp.1255	382000	11000	KNSTD	0.9042	LLNL-CAMS	345404	9946.2	1910000	100000	ND	1	LLNL-CAMS	1910000	100000	COD2021_LOC-PC
BIE2005_RP-20	RP-20	Bierman	2005	10.1002/esp.1255	118000	4000	KNSTD	0.9042	LLNL-CAMS	106696	3616.8	680000	40000	ND	1	LLNL-CAMS	680000	40000	CAZ2019_CRSG2.s
BIE2005_RP-21	RP-21	Bierman	2005	10.1002/esp.1255	121000	6000	KNSTD	0.9042	LLNL-CAMS	109408	5425.2	610000	40000	ND	1	LLNL-CAMS	610000	40000	COX2009_MRC-26
BIE2005_RP-22	RP-22	Bierman	2005	10.1002/esp.1255	124000	5000	KNSTD	0.9042	LLNL-CAMS	112121	4521	660000	30000	ND	1	LLNL-CAMS	660000	30000	COD2021_MQR
BIE2005_RP-23	RP-23	Bierman	2005	10.1002/esp.1255	99000	5000	KNSTD	0.9042	LLNL-CAMS	89515.8	4521	510000	40000	ND	1	LLNL-CAMS	510000	40000	MAS2018_PAN10
BIE2005_RP-24	RP-24	Bierman	2005	10.1002/esp.1255	72000	4000	KNSTD	0.9042	LLNL-CAMS	65102.4	3616.8	420000	20000	ND	1	LLNL-CAMS	420000	20000	CAM2022_CU-121
BIE2005_RP-25	RP-25	Bierman	2005	10.1002/esp.1255	104000	5000	KNSTD	0.9042	LLNL-CAMS	94036.8	4521	570000	40000	ND	1	LLNL-CAMS	570000	40000	SCH2016_CH-080
BIE2005_RP-26	RP-26	Bierman	2005	10.1002/esp.1255	49000	3000	KNSTD	0.9042	LLNL-CAMS	44305.8	2712.6	260000	20000	ND	1	LLNL-CAMS	260000	20000	VAN2022_TG-3
BIE2005_RP-27	RP-27	Bierman	2005	10.1002/esp.1255	126000	5000	KNSTD	0.9042	LLNL-CAMS	113929	4521	760000	40000	ND	1	LLNL-CAMS	760000	40000	CAM2022_CU-120
BIE2005_RP-28	RP-28	Bierman	2005	10.1002/esp.1255	94000	4000	KNSTD	0.9042	LLNL-CAMS	84994.8	3616.8	580000	30000	ND	1	LLNL-CAMS	580000	30000	CAM2022_CU-113
BIE2005_RP-29	RP-29	Bierman	2005	10.1002/esp.1255	202000	7000	KNSTD	0.9042	LLNL-CAMS	182648	6329.4	1180000	70000	ND	1	LLNL-CAMS	1180000	70000	MAT2003_GSWP-1
BIE2005_RP-3	RP-3	Bierman	2005	10.1002/esp.1255	708000	21000	KNSTD	0.9042	LLNL-CAMS	640174	18988.2	3430000	180000	ND	1	LLNL-CAMS	3430000	180000	COX2009_MRC-09
BIE2005_RP-30	RP-30	Bierman	2005	10.1002/esp.1255	74000	3000	KNSTD	0.9042	LLNL-CAMS	66910.8	2712.6	420000	30000	ND	1	LLNL-CAMS	420000	30000	ADA2018_WA1523
BIE2005_RP-31	RP-31	Bierman	2005	10.1002/esp.1255	58000	3000	KNSTD	0.9042	LLNL-CAMS	52443.6	2712.6	360000	20000	ND	1	LLNL-CAMS	360000	20000	CAM2022_CU-110
BIE2005_RP-32	RP-32	Bierman	2005	10.1002/esp.1255	87000	4000	KNSTD	0.9042	LLNL-CAMS	78665.4	3616.8	480000	30000	ND	1	LLNL-CAMS	480000	30000	JTZ2024_cl
BIE2005_RP-33	RP-33	Bierman	2005	10.1002/esp.1255	219000	8000	KNSTD	0.9042	LLNL-CAMS	198020	7233.6	1310000	70000	ND	1	LLNL-CAMS	1310000	70000	STR2018_PIO
BIE2005_RP-34	RP-34	Bierman	2005	10.1002/esp.1255	213000	8000	KNSTD	0.9042	LLNL-CAMS	192595	7233.6	1270000	70000	ND	1	LLNL-CAMS	1270000	70000	POR2015_99-17-xf
BIE2005_RP-35	RP-35	Bierman	2005	10.1002/esp.1255	344000	11000	KNSTD	0.9042	LLNL-CAMS	311045	9946.2	2.03e+06	120000	ND	1	LLNL-CAMS	2.03e+06	120000	MAT2003_GSMP-1
BIE2005_RP-36	RP-36	Bierman	2005	10.1002/esp.1255	375000	13000	KNSTD	0.9042	LLNL-CAMS	339075	11754.6	2310000	140000	ND	1	LLNL-CAMS	2310000	140000	CLA2002_YPG5A
BIE2005_RP-37	RP-37	Bierman	2005	10.1002/esp.1255	245000	9000	KNSTD	0.9042	LLNL-CAMS	221529	8137.8	1520000	80000	ND	1	LLNL-CAMS	1520000	80000	BUT2007_SA04-37-1
BIE2005_RP-38	RP-38	Bierman	2005	10.1002/esp.1255	640000	18000	KNSTD	0.9042	LLNL-CAMS	578688	16275.6	3660000	200000	ND	1	LLNL-CAMS	3660000	200000	JTZ2024_gi
BIE2005_RP-39	RP-39	Bierman	2005	10.1002/esp.1255	388000	14000	KNSTD	0.9042	LLNL-CAMS	350830	12658.8	2420000	120000	ND	1	LLNL-CAMS	2420000	120000	JTZ2024_do
BIE2005_RP-4	RP-4	Bierman	2005	10.1002/esp.1255	209000	7000	KNSTD	0.9042	LLNL-CAMS	188978	6329.4	960000	60000	ND	1	LLNL-CAMS	960000	60000	CAM2022_CU-106
BIE2005_RP-40	RP-40	Bierman	2005	10.1002/esp.1255	558000	21000	KNSTD	0.9042	LLNL-CAMS	504544	18988.2	3220000	170000	ND	1	LLNL-CAMS	3220000	170000	COX2009_MRC-18
BIE2005_RP-41	RP-41	Bierman	2005	10.1002/esp.1255	555000	23000	KNSTD	0.9042	LLNL-CAMS	501831	20796.6	3220000	170000	ND	1	LLNL-CAMS	3220000	170000	COX2009_MRC-17
BIE2005_RP-42	RP-42	Bierman	2005	10.1002/esp.1255	159000	6000	KNSTD	0.9042	LLNL-CAMS	143768	5425.2	990000	60000	ND	1	LLNL-CAMS	990000	60000	COX2009_MRC-01
BIE2005_RP-5	RP-5	Bierman	2005	10.1002/esp.1255	158000	5000	KNSTD	0.9042	LLNL-CAMS	142864	4521	840000	50000	ND	1	LLNL-CAMS	840000	50000	SAF2005_BOL-24
BIE2005_RP-6	RP-6	Bierman	2005	10.1002/esp.1255	204000	7000	KNSTD	0.9042	LLNL-CAMS	184457	6329.4	1100000	70000	ND	1	LLNL-CAMS	1100000	70000	COD2021_LOC-MC
BIE2005_RP-7	RP-7	Bierman	2005	10.1002/esp.1255	127000	5000	KNSTD	0.9042	LLNL-CAMS	114833	4521	740000	40000	ND	1	LLNL-CAMS	740000	40000	CAM2022_CU-016
BIE2005_RP-8	RP-8	Bierman	2005	10.1002/esp.1255	269000	8000	KNSTD	0.9042	LLNL-CAMS	243230	7233.6	1740000	100000	ND	1	LLNL-CAMS	1740000	100000	STR2018_PEA2
BIE2005_RP-9	RP-9	Bierman	2005	10.1002/esp.1255	117000	7000	KNSTD	0.9042	LLNL-CAMS	105791	6329.4	640000	40000	ND	1	LLNL-CAMS	640000	40000	STR2018_NEA2
BUT2007_SA04-29-1	SA04-29-1	Butler	2007	N/A - Thesis	1530000	2000	NIST_30000	0.9313	SUERC	1424889	1862.6	7427000	224000	Z92-0222	1	SUERC	7427000	224000	CAM2022_CU-131
BUT2007_SA04-35-1	SA04-35-1	Butler	2007	N/A - Thesis	1.731e+06	2000	NIST_30000	0.9313	SUERC	1.61208e+06	1862.6	9169000	183000	Z92-0222	1	SUERC	9169000	183000	MAT2003_GSRF-12
BUT2007_SA04-37-1	SA04-37-1	Butler	2007	N/A - Thesis	463000	1000	NIST_30000	0.9313	SUERC	431192	931.3	2537000	78000	Z92-0222	1	SUERC	2537000	78000	COD2021_STN
CAM2022_CU-014	CU-014	Campbell	2022	10.5194/gchron-4-435-2022	43180	1771	07KNSTD3110	1	PRIME	43180	1771	301191	26113	KNSTD	1	PRIME	301191	26113	SOS2016_BRA21
CAM2022_CU-015	CU-015	Campbell	2022	10.5194/gchron-4-435-2022	102840	3976	07KNSTD3110	1	PRIME	102840	3976	638539	32529	KNSTD	1	PRIME	638539	32529	JTZ2024_th
CAM2022_CU-016	CU-016	Campbell	2022	10.5194/gchron-4-435-2022	204439	6430	07KNSTD3110	1	PRIME	204439	6430	742558	24521	KNSTD	1	PRIME	742558	24521	COD2021_LOC-LC
CAM2022_CU-101	CU-101	Campbell	2022	10.5194/gchron-4-435-2022	112264	2449	07KNSTD3110	1	PRIME	112264	2449	718506	25846	KNSTD	1	PRIME	718506	25846	STR2018_COO
CAM2022_CU-102	CU-102	Campbell	2022	10.5194/gchron-4-435-2022	191657	10788	07KNSTD3110	1	PRIME	191657	10788	1271883	138893	KNSTD	1	PRIME	1271883	138893	STR2018_ALB3
CAM2022_CU-106	CU-106	Campbell	2022	10.5194/gchron-4-435-2022	966496	18148	07KNSTD3110	1	PRIME	966496	18148	3669572	122566	KNSTD	1	PRIME	3669572	122566	WIT2016_T16
CAM2022_CU-107	CU-107	Campbell	2022	10.5194/gchron-4-435-2022	261621	11338	07KNSTD3110	1	PRIME	261621	11338	1418603	142192	KNSTD	1	PRIME	1418603	142192	JTZ2024_mot
CAM2022_CU-108	CU-108	Campbell	2022	10.5194/gchron-4-435-2022	87859	5370	07KNSTD3110	1	PRIME	87859	5370	606261	119951	KNSTD	1	PRIME	606261	119951	JTZ2024_vo
CAM2022_CU-109	CU-109	Campbell	2022	10.5194/gchron-4-435-2022	70568	3842	07KNSTD3110	1	PRIME	70568	3842	462955	42429	KNSTD	1	PRIME	462955	42429	MAT2003_GSCO-1A
CAM2022_CU-110	CU-110	Campbell	2022	10.5194/gchron-4-435-2022	167437	4464	07KNSTD3110	1	PRIME	167437	4464	944120	35445	KNSTD	1	PRIME	944120	35445	SOS2016_C_NATA
CAM2022_CU-111	CU-111	Campbell	2022	10.5194/gchron-4-435-2022	40744	2009	07KNSTD3110	1	PRIME	40744	2009	278309	17297	KNSTD	1	PRIME	278309	17297	CAZ2019_PLN1.s
CAM2022_CU-112	CU-112	Campbell	2022	10.5194/gchron-4-435-2022	200613	6646	07KNSTD3110	1	PRIME	200613	6646	1252852	45182	KNSTD	1	PRIME	1252852	45182	JTZ2024_zo
CAM2022_CU-113	CU-113	Campbell	2022	10.5194/gchron-4-435-2022	193008	4542	07KNSTD3110	1	PRIME	193008	4542	1197128	36627	KNSTD	1	PRIME	1197128	36627	STA2017_2
CAM2022_CU-114	CU-114	Campbell	2022	10.5194/gchron-4-435-2022	105663	2868	07KNSTD3110	1	PRIME	105663	2868	734157	34880	KNSTD	1	PRIME	734157	34880	VAN2022_TG-9
CAM2022_CU-115	CU-115	Campbell	2022	10.5194/gchron-4-435-2022	81638	3296	07KNSTD3110	1	PRIME	81638	3296	683670	30184	KNSTD	1	PRIME	683670	30184	CAZ2019_DWN1.s
CAM2022_CU-116	CU-116	Campbell	2022	10.5194/gchron-4-435-2022	109997	2429	07KNSTD3110	1	PRIME	109997	2429	718371	40266	KNSTD	1	PRIME	718371	40266	CAZ2019_RUS1.s
CAM2022_CU-117	CU-117	Campbell	2022	10.5194/gchron-4-435-2022	49895	2750	07KNSTD3110	1	PRIME	49895	2750	278483	29699	KNSTD	1	PRIME	278483	29699	COD2021_LOC-TH
CAM2022_CU-118	CU-118	Campbell	2022	10.5194/gchron-4-435-2022	72971	3572	07KNSTD3110	1	PRIME	72971	3572	372418	61347	KNSTD	1	PRIME	372418	61347	STR2018_PEA4
CAM2022_CU-119	CU-119	Campbell	2022	10.5194/gchron-4-435-2022	386875	7516	07KNSTD3110	1	PRIME	386875	7516	2260671	95226	KNSTD	1	PRIME	2260671	95226	BIE2005_RP-3
CAM2022_CU-120	CU-120	Campbell	2022	10.5194/gchron-4-435-2022	523256	12977	07KNSTD3110	1	PRIME	523256	12977	2430891	74049	KNSTD	1	PRIME	2430891	74049	COX2009_MRC-25
CAM2022_CU-121	CU-121	Campbell	2022	10.5194/gchron-4-435-2022	740745	14266	07KNSTD3110	1	PRIME	740745	14266	3269157	95182	KNSTD	1	PRIME	3269157	95182	COD2021_MAR-KNW
CAM2022_CU-122	CU-122	Campbell	2022	10.5194/gchron-4-435-2022	794719	7239	07KNSTD3110	1	PRIME	794719	7239	4014877	60915	KNSTD	1	PRIME	4014877	60915	CAZ2019_KIN1.s
CAM2022_CU-131	CU-131	Campbell	2022	10.5194/gchron-4-435-2022	812522	18758	07KNSTD3110	1	PRIME	812522	18758	3656186	130861	KNSTD	1	PRIME	3656186	130861	CAZ2019_WHS1.s
CAM2022_CU-132	CU-132	Campbell	2022	10.5194/gchron-4-435-2022	1258837	10122	07KNSTD3110	1	PRIME	1258837	10122	5851985	85379	KNSTD	1	PRIME	5851985	85379	COD2021_BRM
CAZ2019_BAN1.s	BAN1.s	Cazes	2019	10.1002/esp.4744	669891	22462.2	SRM KN-5-2	1	ANSTO	669891	22462.2	3.4853e+06	197714	KN-4-2	1	ANSTO	3.4853e+06	197714	COD2021_CNN
CAZ2019_BET1.s	BET1.s	Cazes	2019	10.1002/esp.4744	794581	27665.1	SRM KN-5-2	1	ANSTO	794581	27665.1	3.67618e+06	322535	KN-4-2	1	ANSTO	3.67618e+06	322535	CAZ2019_JHN1.s
CAZ2019_BIN1.s	BIN1.s	Cazes	2019	10.1002/esp.4744	526784	17529.8	SRM KN-5-2	1	ANSTO	526784	17529.8	2.73971e+06	226203	KN-4-2	1	ANSTO	2.73971e+06	226203	CAM2022_CU-119
CAZ2019_CHB1.s	CHB1.s	Cazes	2019	10.1002/esp.4744	562122	19977.5	SRM KN-5-2	1	ANSTO	562122	19977.5	2.998e+06	171706	KN-4-2	1	ANSTO	2.998e+06	171706	PLA2010_ADBA-5SD
CAZ2019_CRS1.s	CRS1.s	Cazes	2019	10.1002/esp.4744	435543	14033.7	SRM KN-5-2	1	ANSTO	435543	14033.7	2.43964e+06	185241	KN-4-2	1	ANSTO	2.43964e+06	185241	CAZ2019_KED2.s
CAZ2019_CRSG1.s	CRSG1.s	Cazes	2019	10.1002/esp.4744	488228	17366	SRM KN-5-2	1	ANSTO	488228	17366	2.50558e+06	172493	KN-4-2	1	ANSTO	2.50558e+06	172493	STR2018_OLA
CAZ2019_CRSG2.s	CRSG2.s	Cazes	2019	10.1002/esp.4744	284132	9528.19	SRM KN-5-2	1	ANSTO	284132	9528.19	1.43511e+06	175651	KN-4-2	1	ANSTO	1.43511e+06	175651	CAZ2019_BAN1.s
CAZ2019_DMP1.s	DMP1.s	Cazes	2019	10.1002/esp.4744	992371	34885.6	SRM KN-5-2	1	ANSTO	992371	34885.6	4.9776e+06	481115	KN-4-2	1	ANSTO	4.9776e+06	481115	SAF2005_BOL-32
CAZ2019_DRY1.s	DRY1.s	Cazes	2019	10.1002/esp.4744	845962	26112.3	SRM KN-5-2	1	ANSTO	845962	26112.3	4.08878e+06	271403	KN-4-2	1	ANSTO	4.08878e+06	271403	SCH2025_O103oo
CAZ2019_DRY2.s	DRY2.s	Cazes	2019	10.1002/esp.4744	892191	28195.5	SRM KN-5-2	1	ANSTO	892191	28195.5	4.62519e+06	304649	KN-4-2	1	ANSTO	4.62519e+06	304649	KOB2009_LL4
CAZ2019_DRY3.s	DRY3.s	Cazes	2019	10.1002/esp.4744	822634	24718.9	SRM KN-5-2	1	ANSTO	822634	24718.9	4.51318e+06	268287	KN-4-2	1	ANSTO	4.51318e+06	268287	CAZ2019_BIN1.s
CAZ2019_DUN1.s	DUN1.s	Cazes	2019	10.1002/esp.4744	317563	12111.4	SRM KN-5-2	1	ANSTO	317563	12111.4	1.70238e+06	103399	KN-4-2	1	ANSTO	1.70238e+06	103399	CAZ2019_BET1.s
CAZ2019_DUR1.s	DUR1.s	Cazes	2019	10.1002/esp.4744	724292	24165.5	SRM KN-5-2	1	ANSTO	724292	24165.5	3.94196e+06	285349	KN-4-2	1	ANSTO	3.94196e+06	285349	CAZ2019_HAN1.s
CAZ2019_DWN1.s	DWN1.s	Cazes	2019	10.1002/esp.4744	649814	22342.8	SRM KN-5-2	1	ANSTO	649814	22342.8	3.30228e+06	189362	KN-4-2	1	ANSTO	3.30228e+06	189362	CAZ2019_GIB1.s
CAZ2019_GIB1.s	GIB1.s	Cazes	2019	10.1002/esp.4744	984249	35540.1	SRM KN-5-2	1	ANSTO	984249	35540.1	5.20769e+06	291004	KN-4-2	1	ANSTO	5.20769e+06	291004	STR2018_NEA1
CAZ2019_HAN1.s	HAN1.s	Cazes	2019	10.1002/esp.4744	1.12259e+06	36513.7	SRM KN-5-2	1	ANSTO	1.12259e+06	36513.7	5.37642e+06	302497	KN-4-2	1	ANSTO	5.37642e+06	302497	FUL2020_MryAW
CAZ2019_JHN1.s	JHN1.s	Cazes	2019	10.1002/esp.4744	643549	23452	SRM KN-5-2	1	ANSTO	643549	23452	3.37863e+06	268354	KN-4-2	1	ANSTO	3.37863e+06	268354
CAZ2019_KED1.s	KED1.s	Cazes	2019	10.1002/esp.4744	1.18051e+06	35686.6	SRM KN-5-2	1	ANSTO	1.18051e+06	35686.6	6.52212e+06	460585	KN-4-2	1	ANSTO	6.52212e+06	460585
CAZ2019_KED2.s	KED2.s	Cazes	2019	10.1002/esp.4744	1.06964e+06	32463.8	SRM KN-5-2	1	ANSTO	1.06964e+06	32463.8	5.36875e+06	341871	KN-4-2	1	ANSTO	5.36875e+06	341871
CAZ2019_KED3.s	KED3.s	Cazes	2019	10.1002/esp.4744	1.02543e+06	34272.4	SRM KN-5-2	1	ANSTO	1.02543e+06	34272.4	4.99508e+06	341423	KN-4-2	1	ANSTO	4.99508e+06	341423
CAZ2019_KIN1.s	KIN1.s	Cazes	2019	10.1002/esp.4744	446029	17741.8	SRM KN-5-2	1	ANSTO	446029	17741.8	2.4887e+06	143068	KN-4-2	1	ANSTO	2.4887e+06	143068
CAZ2019_KNG1.s	KNG1.s	Cazes	2019	10.1002/esp.4744	684626	23376.7	SRM KN-5-2	1	ANSTO	684626	23376.7	3.31986e+06	255197	KN-4-2	1	ANSTO	3.31986e+06	255197
CAZ2019_MRG1.s	MRG1.s	Cazes	2019	10.1002/esp.4744	721147	26552	SRM KN-5-2	1	ANSTO	721147	26552	3.66842e+06	258033	KN-4-2	1	ANSTO	3.66842e+06	258033
CAZ2019_PEN1.s	PEN1.s	Cazes	2019	10.1002/esp.4744	602001	19792	SRM KN-5-2	1	ANSTO	602001	19792	3.27276e+06	230418	KN-4-2	1	ANSTO	3.27276e+06	230418
CAZ2019_PLN1.s	PLN1.s	Cazes	2019	10.1002/esp.4744	1.15515e+06	35317.4	SRM KN-5-2	1	ANSTO	1.15515e+06	35317.4	5.40614e+06	409884	KN-4-2	1	ANSTO	5.40614e+06	409884
CAZ2019_RUS1.s	RUS1.s	Cazes	2019	10.1002/esp.4744	1.16751e+06	41000.4	SRM KN-5-2	1	ANSTO	1.16751e+06	41000.4	5.30599e+06	296614	KN-4-2	1	ANSTO	5.30599e+06	296614
CAZ2019_WHS1.s	WHS1.s	Cazes	2019	10.1002/esp.4744	886462	29447.7	SRM KN-5-2	1	ANSTO	886462	29447.7	4.51122e+06	254287	KN-4-2	1	ANSTO	4.51122e+06	254287
CLA2000_NY-18A	NY-18A	Clapp	2000	10.1130/0091-7613(2000)28<995:SYESPI>2.0.CO;2	120000	7000	KNSTD	0.9042	LLNL-CAMS	108504	6329	861000	78000	KNSTD	1	LLNL-CAMS	861000	78000
CLA2000_NY-18B	NY-18B	Clapp	2000	10.1130/0091-7613(2000)28<995:SYESPI>2.0.CO;2	127000	7000	KNSTD	0.9042	LLNL-CAMS	114833	6329	818000	48000	KNSTD	1	LLNL-CAMS	818000	48000
CLA2000_NY-18C1	NY-18C1	Clapp	2000	10.1130/0091-7613(2000)28<995:SYESPI>2.0.CO;2	142000	9000	KNSTD	0.9042	LLNL-CAMS	128396	8138	859000	54000	KNSTD	1	LLNL-CAMS	859000	54000
CLA2000_NY-18C2	NY-18C2	Clapp	2000	10.1130/0091-7613(2000)28<995:SYESPI>2.0.CO;2	159000	7000	KNSTD	0.9042	LLNL-CAMS	143768	6329	927000	59000	KNSTD	1	LLNL-CAMS	927000	59000
CLA2000_NY-19A	NY-19A	Clapp	2000	10.1130/0091-7613(2000)28<995:SYESPI>2.0.CO;2	120000	8000	KNSTD	0.9042	LLNL-CAMS	108504	7234	832000	84000	KNSTD	1	LLNL-CAMS	832000	84000
CLA2000_NY-19B	NY-19B	Clapp	2000	10.1130/0091-7613(2000)28<995:SYESPI>2.0.CO;2	131000	6000	KNSTD	0.9042	LLNL-CAMS	118450	5425	778000	47000	KNSTD	1	LLNL-CAMS	778000	47000
CLA2000_NY-19C	NY-19C	Clapp	2000	10.1130/0091-7613(2000)28<995:SYESPI>2.0.CO;2	119000	7000	KNSTD	0.9042	LLNL-CAMS	107600	6329	923000	65000	KNSTD	1	LLNL-CAMS	923000	65000
CLA2000_NY-20A1	NY-20A1	Clapp	2000	10.1130/0091-7613(2000)28<995:SYESPI>2.0.CO;2	125000	5000	KNSTD	0.9042	LLNL-CAMS	113025	4521	826000	49000	KNSTD	1	LLNL-CAMS	826000	49000
CLA2000_NY-20B	NY-20B	Clapp	2000	10.1130/0091-7613(2000)28<995:SYESPI>2.0.CO;2	123000	5000	KNSTD	0.9042	LLNL-CAMS	111217	4521	816000	45000	KNSTD	1	LLNL-CAMS	816000	45000
CLA2000_NY-20C	NY-20C	Clapp	2000	10.1130/0091-7613(2000)28<995:SYESPI>2.0.CO;2	119000	5000	KNSTD	0.9042	LLNL-CAMS	107600	4521	802000	60000	KNSTD	1	LLNL-CAMS	802000	60000
CLA2000_NY-4	NY-4	Clapp	2000	10.1130/0091-7613(2000)28<995:SYESPI>2.0.CO;2	132000	10000	KNSTD	0.9042	LLNL-CAMS	119354	9042	896000	76000	KNSTD	1	LLNL-CAMS	896000	76000
CLA2001_ECAC-10	ECAC-10	Clapp	2001	10.1006/qres.2000.2211	198000	9000	KNSTD	0.9042	LLNL-CAMS	179032	8138	1.21936e+06	104373	KNSTD	1	LLNL-CAMS	1.21936e+06	104373
CLA2001_ECAC-11-1	ECAC-11-1	Clapp	2001	10.1006/qres.2000.2211	130000	10000	KNSTD	0.9042	LLNL-CAMS	117546	9042	704741	52786.9	KNSTD	1	LLNL-CAMS	704741	52786.9
CLA2001_ECAC-11-2	ECAC-11-2	Clapp	2001	10.1006/qres.2000.2211	120000	8000	KNSTD	0.9042	LLNL-CAMS	108504	7234	705848	60675.1	KNSTD	1	LLNL-CAMS	705848	60675.1
CLA2001_ECAC-11-3	ECAC-11-3	Clapp	2001	10.1006/qres.2000.2211	108000	21000	KNSTD	0.9042	LLNL-CAMS	97654	18988	597876	51808.3	KNSTD	1	LLNL-CAMS	597876	51808.3
CLA2001_ECAC-8-2	ECAC-8-2	Clapp	2001	10.1006/qres.2000.2211	174000	9000	KNSTD	0.9042	LLNL-CAMS	157331	8138	1.00726e+06	105425	KNSTD	1	LLNL-CAMS	1.00726e+06	105425
CLA2001_ECAC-9	ECAC-9	Clapp	2001	10.1006/qres.2000.2211	135000	6000	KNSTD	0.9042	LLNL-CAMS	122067	5425	843952	58421.5	KNSTD	1	LLNL-CAMS	843952	58421.5
CLA2002_YPG12A	YPG12A	Clapp	2002	10.1016/S0169-555X(01)00191-X	139000	10000	KNSTD	0.9042	LLNL-CAMS	125684	9042	912000	70000	KNSTD	1	LLNL-CAMS	912000	70000
CLA2002_YPG12B	YPG12B	Clapp	2002	10.1016/S0169-555X(01)00191-X	138000	7000	KNSTD	0.9042	LLNL-CAMS	124780	6329	930000	60000	KNSTD	1	LLNL-CAMS	930000	60000
CLA2002_YPG12C	YPG12C	Clapp	2002	10.1016/S0169-555X(01)00191-X	132000	9000	KNSTD	0.9042	LLNL-CAMS	119354	8138	869000	104000	KNSTD	1	LLNL-CAMS	869000	104000
CLA2002_YPG13A	YPG13A	Clapp	2002	10.1016/S0169-555X(01)00191-X	136000	11000	KNSTD	0.9042	LLNL-CAMS	122971	9946	943000	66000	KNSTD	1	LLNL-CAMS	943000	66000
CLA2002_YPG13B	YPG13B	Clapp	2002	10.1016/S0169-555X(01)00191-X	158000	8000	KNSTD	0.9042	LLNL-CAMS	142864	7234	896000	49000	KNSTD	1	LLNL-CAMS	896000	49000
CLA2002_YPG14A	YPG14A	Clapp	2002	10.1016/S0169-555X(01)00191-X	120000	8000	KNSTD	0.9042	LLNL-CAMS	108504	7234	1577000	445000	KNSTD	1	LLNL-CAMS	850000	62000
CLA2002_YPG14B	YPG14B	Clapp	2002	10.1016/S0169-555X(01)00191-X	130000	5000	KNSTD	0.9042	LLNL-CAMS	117546	4521	850000	62000	KNSTD	1	LLNL-CAMS	743000	71000
CLA2002_YPG14C	YPG14C	Clapp	2002	10.1016/S0169-555X(01)00191-X	122000	6000	KNSTD	0.9042	LLNL-CAMS	110312	5425	743000	71000	KNSTD	1	LLNL-CAMS	811000	50000
CLA2002_YPG16A	YPG16A	Clapp	2002	10.1016/S0169-555X(01)00191-X	84000	5000	KNSTD	0.9042	LLNL-CAMS	75953	4521	469000	39000	KNSTD	1	LLNL-CAMS	469000	39000
CLA2002_YPG17A	YPG17A	Clapp	2002	10.1016/S0169-555X(01)00191-X	154000	6000	KNSTD	0.9042	LLNL-CAMS	139247	5425	893000	55000	KNSTD	1	LLNL-CAMS	893000	55000
CLA2002_YPG18A	YPG18A	Clapp	2002	10.1016/S0169-555X(01)00191-X	156000	6000	KNSTD	0.9042	LLNL-CAMS	141055	5425	942000	54000	KNSTD	1	LLNL-CAMS	942000	54000
CLA2002_YPG19A	YPG19A	Clapp	2002	10.1016/S0169-555X(01)00191-X	177000	10000	KNSTD	0.9042	LLNL-CAMS	160043	9042	811000	50000	KNSTD	1	LLNL-CAMS	1119000	90000
CLA2002_YPG20A	YPG20A	Clapp	2002	10.1016/S0169-555X(01)00191-X	192000	11000	KNSTD	0.9042	LLNL-CAMS	173606	9946	1155000	79000	KNSTD	1	LLNL-CAMS	1155000	79000
CLA2002_YPG21A	YPG21A	Clapp	2002	10.1016/S0169-555X(01)00191-X	219000	8000	KNSTD	0.9042	LLNL-CAMS	198020	7234	1434000	84000	KNSTD	1	LLNL-CAMS	1434000	84000
CLA2002_YPG22A	YPG22A	Clapp	2002	10.1016/S0169-555X(01)00191-X	153000	14000	KNSTD	0.9042	LLNL-CAMS	138343	12659	910000	117000	KNSTD	1	LLNL-CAMS	910000	117000
CLA2002_YPG27	YPG27	Clapp	2002	10.1016/S0169-555X(01)00191-X	166000	9000	KNSTD	0.9042	LLNL-CAMS	150097	8138	1039000	53000	KNSTD	1	LLNL-CAMS	1039000	53000
CLA2002_YPG28	YPG28	Clapp	2002	10.1016/S0169-555X(01)00191-X	216000	10000	KNSTD	0.9042	LLNL-CAMS	195307	9042	1422000	73000	KNSTD	1	LLNL-CAMS	1422000	73000
CLA2002_YPG2A	YPG2A	Clapp	2002	10.1016/S0169-555X(01)00191-X	111000	9000	KNSTD	0.9042	LLNL-CAMS	100366	8138	654000	35000	KNSTD	1	LLNL-CAMS	654000	35000
CLA2002_YPG2B	YPG2B	Clapp	2002	10.1016/S0169-555X(01)00191-X	139000	10000	KNSTD	0.9042	LLNL-CAMS	125684	9042	798000	46000	KNSTD	1	LLNL-CAMS	798000	46000
CLA2002_YPG2C	YPG2C	Clapp	2002	10.1016/S0169-555X(01)00191-X	108000	8000	KNSTD	0.9042	LLNL-CAMS	97654	7234	769000	44000	KNSTD	1	LLNL-CAMS	769000	44000
CLA2002_YPG2D	YPG2D	Clapp	2002	10.1016/S0169-555X(01)00191-X	118000	10000	KNSTD	0.9042	LLNL-CAMS	106696	9042	662000	42000	KNSTD	1	LLNL-CAMS	662000	42000
CLA2002_YPG2E	YPG2E	Clapp	2002	10.1016/S0169-555X(01)00191-X	99000	13000	KNSTD	0.9042	LLNL-CAMS	89516	11755	711000	52000	KNSTD	1	LLNL-CAMS	711000	52000
CLA2002_YPG2F	YPG2F	Clapp	2002	10.1016/S0169-555X(01)00191-X	109000	12000	KNSTD	0.9042	LLNL-CAMS	98558	10850	632000	39000	KNSTD	1	LLNL-CAMS	632000	39000
CLA2002_YPG3A	YPG3A	Clapp	2002	10.1016/S0169-555X(01)00191-X	116000	7000	KNSTD	0.9042	LLNL-CAMS	104887	6329	697000	58000	KNSTD	1	LLNL-CAMS	697000	58000
CLA2002_YPG4A	YPG4A	Clapp	2002	10.1016/S0169-555X(01)00191-X	115000	11000	KNSTD	0.9042	LLNL-CAMS	103983	9946	646000	38000	KNSTD	1	LLNL-CAMS	646000	38000
CLA2002_YPG4B	YPG4B	Clapp	2002	10.1016/S0169-555X(01)00191-X	134000	11000	KNSTD	0.9042	LLNL-CAMS	121163	9946	763000	74000	KNSTD	1	LLNL-CAMS	763000	74000
CLA2002_YPG5A	YPG5A	Clapp	2002	10.1016/S0169-555X(01)00191-X	136000	7000	KNSTD	0.9042	LLNL-CAMS	122971	6329	683000	41000	KNSTD	1	LLNL-CAMS	683000	41000
COD2021_BGA	BGA	Codilean	2021	10.1016/j.earscirev.2021.103543	175165	5783.21	SRM KN-5-2	1	ANSTO	175165	5783.21	1.07389e+06	62401.2	KN-4-2	1	ANSTO	1.07389e+06	62401.2
COD2021_BLG	BLG	Codilean	2021	10.1016/j.earscirev.2021.103543	76181.1	2306.4	SRM KN-5-2	1	ANSTO	76181.1	2306.4	512832	38815.3	KN-4-2	1	ANSTO	512832	38815.3
COD2021_BRM	BRM	Codilean	2021	10.1016/j.earscirev.2021.103543	271423	9029.33	SRM KN-5-2	1	ANSTO	271423	9029.33	1.39264e+06	70634.9	KN-4-2	1	ANSTO	1.39264e+06	70634.9
COD2021_BRS	BRS	Codilean	2021	10.1016/j.earscirev.2021.103543	133971	4283.21	SRM KN-5-2	1	ANSTO	133971	4283.21	845780	49188.3	KN-4-2	1	ANSTO	845780	49188.3
COD2021_BRS-CC	BRS-CC	Codilean	2021	10.1016/j.earscirev.2021.103543	200424	6363.38	SRM KN-5-2	1	ANSTO	200424	6363.38	1.10397e+06	67617.9	KN-4-2	1	ANSTO	1.10397e+06	67617.9
COD2021_BRS-UP	BRS-UP	Codilean	2021	10.1016/j.earscirev.2021.103543	176227	5960.29	SRM KN-5-2	1	ANSTO	176227	5960.29	1.0889e+06	62773.8	KN-4-2	1	ANSTO	1.0889e+06	62773.8
COD2021_CLA	CLA	Codilean	2021	10.1016/j.earscirev.2021.103543	150324	4231.33	SRM KN-5-2	1	ANSTO	150324	4231.33	956538	130001	KN-4-2	1	ANSTO	956538	130001
COD2021_CLY	CLY	Codilean	2021	10.1016/j.earscirev.2021.103543	170483	5577.27	SRM KN-5-2	1	ANSTO	170483	5577.27	1.18048e+06	103905	KN-4-2	1	ANSTO	1.18048e+06	103905
COD2021_CNN	CNN	Codilean	2021	10.1016/j.earscirev.2021.103543	302347	8496.19	SRM KN-5-2	1	ANSTO	302347	8496.19	1.78465e+06	89073.4	KN-4-2	1	ANSTO	1.78465e+06	89073.4
COD2021_COL	COL	Codilean	2021	10.1016/j.earscirev.2021.103543	177141	4531.94	SRM KN-5-2	1	ANSTO	177141	4531.94	1.18238e+06	77462.2	KN-4-2	1	ANSTO	1.18238e+06	77462.2
COD2021_FTZ-CMT	FTZ-CMT	Codilean	2021	10.1016/j.earscirev.2021.103543	238260	9465.52	SRM KN-5-2	1	ANSTO	238260	9465.52	1.26656e+06	109248	KN-4-2	1	ANSTO	1.26656e+06	109248
COD2021_FTZ-CNR	FTZ-CNR	Codilean	2021	10.1016/j.earscirev.2021.103543	304207	12997.7	SRM KN-5-2	1	ANSTO	304207	12997.7	2.06728e+06	206559	KN-4-2	1	ANSTO	2.06728e+06	206559
COD2021_FTZ-DON	FTZ-DON	Codilean	2021	10.1016/j.earscirev.2021.103543	222142	12724.9	SRM KN-5-2	1	ANSTO	222142	12724.9	1.74508e+06	137673	KN-4-2	1	ANSTO	1.74508e+06	137673
COD2021_FTZ-EBW	FTZ-EBW	Codilean	2021	10.1016/j.earscirev.2021.103543	186300	9312.01	SRM KN-5-2	1	ANSTO	186300	9312.01	1.10882e+06	88975.1	KN-4-2	1	ANSTO	1.10882e+06	88975.1
COD2021_FTZ-ISC-IS	FTZ-ISC-IS	Codilean	2021	10.1016/j.earscirev.2021.103543	327123	13499.5	SRM KN-5-2	1	ANSTO	327123	13499.5	1.76122e+06	147090	KN-4-2	1	ANSTO	1.76122e+06	147090
COD2021_FTZ-ISC-MDR	FTZ-ISC-MDR	Codilean	2021	10.1016/j.earscirev.2021.103543	331805	13974.8	SRM KN-5-2	1	ANSTO	331805	13974.8	1.92529e+06	152380	KN-4-2	1	ANSTO	1.92529e+06	152380
COD2021_FTZ-MKZ-B	FTZ-MKZ-B	Codilean	2021	10.1016/j.earscirev.2021.103543	320325	17217.7	SRM KN-5-2	1	ANSTO	320325	17217.7	1.86299e+06	154667	KN-4-2	1	ANSTO	1.86299e+06	154667
COD2021_FTZ-MKZ-DS	FTZ-MKZ-DS	Codilean	2021	10.1016/j.earscirev.2021.103543	275621	12092	SRM KN-5-2	1	ANSTO	275621	12092	1.42925e+06	122365	KN-4-2	1	ANSTO	1.42925e+06	122365
COD2021_FTZ-NGA	FTZ-NGA	Codilean	2021	10.1016/j.earscirev.2021.103543	222845	16061.5	SRM KN-5-2	1	ANSTO	222845	16061.5	1.47516e+06	113142	KN-4-2	1	ANSTO	1.47516e+06	113142
COD2021_FTZ-TRS	FTZ-TRS	Codilean	2021	10.1016/j.earscirev.2021.103543	332996	16439.6	SRM KN-5-2	1	ANSTO	332996	16439.6	2.05753e+06	152904	KN-4-2	1	ANSTO	2.05753e+06	152904
COD2021_GNA	GNA	Codilean	2021	10.1016/j.earscirev.2021.103543	338796	9515.53	SRM KN-5-2	1	ANSTO	338796	9515.53	2.20458e+06	107374	KN-4-2	1	ANSTO	2.20458e+06	107374
COD2021_HAS	HAS	Codilean	2021	10.1016/j.earscirev.2021.103543	167036	4534.55	SRM KN-5-2	1	ANSTO	167036	4534.55	1.15856e+06	83174	KN-4-2	1	ANSTO	1.15856e+06	83174
COD2021_HNT	HNT	Codilean	2021	10.1016/j.earscirev.2021.103543	166775	5027.22	SRM KN-5-2	1	ANSTO	166775	5027.22	1.01273e+06	64990.2	KN-4-2	1	ANSTO	1.01273e+06	64990.2
COD2021_HNT-SNGT	HNT-SNGT	Codilean	2021	10.1016/j.earscirev.2021.103543	157972	4308.7	SRM KN-5-2	1	ANSTO	157972	4308.7	913099	69722.5	KN-4-2	1	ANSTO	913099	69722.5
COD2021_HNT-WLL	HNT-WLL	Codilean	2021	10.1016/j.earscirev.2021.103543	141489	3836.63	SRM KN-5-2	1	ANSTO	141489	3836.63	803707	54878.5	KN-4-2	1	ANSTO	803707	54878.5
COD2021_LGN	LGN	Codilean	2021	10.1016/j.earscirev.2021.103543	116551	3643.22	SRM KN-5-2	1	ANSTO	116551	3643.22	653248	43826	KN-4-2	1	ANSTO	653248	43826
COD2021_LOC	LOC	Codilean	2021	10.1016/j.earscirev.2021.103543	210315	6354.19	SRM KN-5-2	1	ANSTO	210315	6354.19	1.12466e+06	57484.1	KN-4-2	1	ANSTO	1.12466e+06	57484.1
COD2021_LOC-15MC	LOC-15MC	Codilean	2021	10.1016/j.earscirev.2021.103543	124008	3969.36	SRM KN-5-2	1	ANSTO	124008	3969.36	777746	47217.2	KN-4-2	1	ANSTO	777746	47217.2
COD2021_LOC-FSC	LOC-FSC	Codilean	2021	10.1016/j.earscirev.2021.103543	117641	3818.58	SRM KN-5-2	1	ANSTO	117641	3818.58	747628	46198.8	KN-4-2	1	ANSTO	747628	46198.8
COD2021_LOC-LC	LOC-LC	Codilean	2021	10.1016/j.earscirev.2021.103543	139507	4425.94	SRM KN-5-2	1	ANSTO	139507	4425.94	746658	51800.8	KN-4-2	1	ANSTO	746658	51800.8
COD2021_LOC-MC	LOC-MC	Codilean	2021	10.1016/j.earscirev.2021.103543	214130	6599.56	SRM KN-5-2	1	ANSTO	214130	6599.56	1.2117e+06	63557.7	KN-4-2	1	ANSTO	1.2117e+06	63557.7
COD2021_LOC-PC	LOC-PC	Codilean	2021	10.1016/j.earscirev.2021.103543	222322	7049.36	SRM KN-5-2	1	ANSTO	222322	7049.36	1.29615e+06	72310	KN-4-2	1	ANSTO	1.29615e+06	72310
COD2021_LOC-SCS	LOC-SCS	Codilean	2021	10.1016/j.earscirev.2021.103543	340539	10782.2	SRM KN-5-2	1	ANSTO	340539	10782.2	1.88135e+06	94697.4	KN-4-2	1	ANSTO	1.88135e+06	94697.4
COD2021_LOC-TH	LOC-TH	Codilean	2021	10.1016/j.earscirev.2021.103543	109700	3474.99	SRM KN-5-2	1	ANSTO	109700	3474.99	584937	45455	KN-4-2	1	ANSTO	584937	45455
COD2021_MAN	MAN	Codilean	2021	10.1016/j.earscirev.2021.103543	184196	4843.84	SRM KN-5-2	1	ANSTO	184196	4843.84	1.22481e+06	74212.3	KN-4-2	1	ANSTO	1.22481e+06	74212.3
COD2021_MAR-KNW	MAR-KNW	Codilean	2021	10.1016/j.earscirev.2021.103543	105736	3537.29	SRM KN-5-2	1	ANSTO	105736	3537.29	618925	43214.6	KN-4-2	1	ANSTO	618925	43214.6
COD2021_MAR-OB	MAR-OB	Codilean	2021	10.1016/j.earscirev.2021.103543	82027.6	2820.25	SRM KN-5-2	1	ANSTO	82027.6	2820.25	458704	48685.6	KN-4-2	1	ANSTO	458704	48685.6
COD2021_MCD	MCD	Codilean	2021	10.1016/j.earscirev.2021.103543	144487	3910.02	SRM KN-5-2	1	ANSTO	144487	3910.02	880246	68774.6	KN-4-2	1	ANSTO	880246	68774.6
COD2021_MCL	MCL	Codilean	2021	10.1016/j.earscirev.2021.103543	101772	3044.29	SRM KN-5-2	1	ANSTO	101772	3044.29	633798	43296.8	KN-4-2	1	ANSTO	633798	43296.8
COD2021_MOR	MOR	Codilean	2021	10.1016/j.earscirev.2021.103543	169037	5556.78	SRM KN-5-2	1	ANSTO	169037	5556.78	1.06755e+06	67244.2	KN-4-2	1	ANSTO	1.06755e+06	67244.2
COD2021_MQR	MQR	Codilean	2021	10.1016/j.earscirev.2021.103543	90844.9	2624.98	SRM KN-5-2	1	ANSTO	90844.9	2624.98	532849	39945.7	KN-4-2	1	ANSTO	532849	39945.7
COD2021_MTC	MTC	Codilean	2021	10.1016/j.earscirev.2021.103543	443845	12439.5	SRM KN-5-2	1	ANSTO	443845	12439.5	2.21468e+06	124870	KN-4-2	1	ANSTO	2.21468e+06	124870
COD2021_SHL	SHL	Codilean	2021	10.1016/j.earscirev.2021.103543	199942	5721.27	SRM KN-5-2	1	ANSTO	199942	5721.27	1.25915e+06	70678.8	KN-4-2	1	ANSTO	1.25915e+06	70678.8
COD2021_SNW	SNW	Codilean	2021	10.1016/j.earscirev.2021.103543	524107	14139.7	SRM KN-5-2	1	ANSTO	524107	14139.7	3.11045e+06	149440	KN-4-2	1	ANSTO	3.11045e+06	149440
COD2021_STN	STN	Codilean	2021	10.1016/j.earscirev.2021.103543	142460	4732.34	SRM KN-5-2	1	ANSTO	142460	4732.34	830636	50623.6	KN-4-2	1	ANSTO	830636	50623.6
COD2021_TMB	TMB	Codilean	2021	10.1016/j.earscirev.2021.103543	322703	9591.73	SRM KN-5-2	1	ANSTO	322703	9591.73	1.7905e+06	106123	KN-4-2	1	ANSTO	1.7905e+06	106123
COD2021_TRS	TRS	Codilean	2021	10.1016/j.earscirev.2021.103543	136957	4241.97	SRM KN-5-2	1	ANSTO	136957	4241.97	942270	52042.8	KN-4-2	1	ANSTO	942270	52042.8
COX2009_MRC-01	MRC-01	Brosens	2023	10.1002/esp.5586	573773	10895.3	07KNSTD3110	1	LLNL-CAMS	573773	10895.3	3.30015e+06	82854.9	KNSTD	1	PRIME	3.30015e+06	82854.9
COX2009_MRC-05	MRC-05	Brosens	2023	10.1002/esp.5586	1.90787e+06	27509.2	07KNSTD3110	1	LLNL-CAMS	1.90787e+06	27509.2	1.05099e+07	220132	KNSTD	1	PRIME	1.05099e+07	220132
COX2009_MRC-09	MRC-09	Brosens	2023	10.1002/esp.5586	118012	2994.33	07KNSTD3110	1	LLNL-CAMS	118012	2994.33	681798	23423.2	KNSTD	1	PRIME	681798	23423.2
COX2009_MRC-11	MRC-11	Brosens	2023	10.1002/esp.5586	68674.5	1881.48	07KNSTD3110	1	LLNL-CAMS	68674.5	1881.48	440687	26637	KNSTD	1	PRIME	440687	26637
COX2009_MRC-14	MRC-14	Brosens	2023	10.1002/esp.5586	46525.1	1285.81	07KNSTD3110	1	LLNL-CAMS	46525.1	1285.81	334698	20912.6	KNSTD	1	PRIME	334698	20912.6
COX2009_MRC-17	MRC-17	Brosens	2023	10.1002/esp.5586	1.47784e+06	27075.9	07KNSTD3110	1	LLNL-CAMS	1.47784e+06	27075.9	8.03843e+06	151317	KNSTD	1	PRIME	8.03843e+06	151317
COX2009_MRC-18	MRC-18	Brosens	2023	10.1002/esp.5586	910263	15116.3	07KNSTD3110	1	LLNL-CAMS	910263	15116.3	4.8833e+06	91316.4	KNSTD	1	PRIME	4.8833e+06	91316.4
COX2009_MRC-21	MRC-21	Brosens	2023	10.1002/esp.5586	125837	3341.16	07KNSTD3110	1	LLNL-CAMS	125837	3341.16	895117	23809.9	KNSTD	1	PRIME	895117	23809.9
COX2009_MRC-24	MRC-24	Brosens	2023	10.1002/esp.5586	144104	3609.58	07KNSTD3110	1	LLNL-CAMS	144104	3609.58	827144	21301.4	KNSTD	1	PRIME	827144	21301.4
COX2009_MRC-25	MRC-25	Brosens	2023	10.1002/esp.5586	495976	11629.1	07KNSTD3110	1	LLNL-CAMS	495976	11629.1	2.91125e+06	53145.4	KNSTD	1	PRIME	2.91125e+06	53145.4
COX2009_MRC-26	MRC-26	Brosens	2023	10.1002/esp.5586	165519	4144.91	07KNSTD3110	1	LLNL-CAMS	165519	4144.91	1.04292e+06	25625.5	KNSTD	1	PRIME	1.04292e+06	25625.5
COX2009_MRC-29	MRC-29	Brosens	2023	10.1002/esp.5586	515858	9213.09	07KNSTD3110	1	LLNL-CAMS	515858	9213.09	3.25599e+06	66927.1	KNSTD	1	PRIME	3.25599e+06	66927.1
COX2009_MRC-30	MRC-30	Brosens	2023	10.1002/esp.5586	262706	6431.9	07KNSTD3110	1	LLNL-CAMS	262706	6431.9	1.69632e+06	51933	KNSTD	1	PRIME	1.69632e+06	51933
COX2009_MRC-31	MRC-31	Brosens	2023	10.1002/esp.5586	411884	9888.75	07KNSTD3110	1	LLNL-CAMS	411884	9888.75	2.36825e+06	78015.9	KNSTD	1	PRIME	2.36825e+06	78015.9
DET2014_DC-01-17	DC-01-17	Dethier	2014	10.1130/G34922.1	634000	8280	07KNSTD	1	LLNL-CAMS	634000	8280	4.55517e+06	112347	KNSTD	1	PRIME	4.55517e+06	112347
DET2014_MJ-BC-17	MJ-BC-17	Dethier	2014	10.1130/G34922.1	1140000	13900	07KNSTD	1	LLNL-CAMS	1140000	13900	6.96936e+06	236254	KNSTD	1	PRIME	6.96936e+06	236254
ECC2019_BR2	BR2	Eccleshall	2019	ro.uow.edu.au/theses1/554	480000	10000	SRM KN-5-2	1	ANSTO	480000	10000	2250000	400000	KN-4-2	1	ANSTO	2250000	400000
ECC2019_BW1	BW1	Eccleshall	2019	ro.uow.edu.au/theses1/554	520000	17000	SRM KN-5-2	1	ANSTO	520000	17000	2060000	150000	KN-4-2	1	ANSTO	2060000	150000
ECC2019_CB1	CB1	Eccleshall	2019	ro.uow.edu.au/theses1/554	490000	18000	SRM KN-5-2	1	ANSTO	490000	18000	1770000	160000	KN-4-2	1	ANSTO	1770000	160000
ECC2019_CH-FS1	CH-FS1	Eccleshall	2019	ro.uow.edu.au/theses1/554	510000	6000	SRM KN-5-2	1	ANSTO	510000	6000	3250000	230000	KN-4-2	1	ANSTO	3250000	230000
ECC2019_CO1	CO1	Eccleshall	2019	ro.uow.edu.au/theses1/554	500000	7000	SRM KN-5-2	1	ANSTO	500000	7000	1860000	230000	KN-4-2	1	ANSTO	1860000	230000
ECC2019_KWB-FS1	KWB-FS1	Eccleshall	2019	ro.uow.edu.au/theses1/554	420000	6000	SRM KN-5-2	1	ANSTO	420000	6000	1620000	220000	KN-4-2	1	ANSTO	1620000	220000
ECC2019_NET-FS1	NET-FS1	Eccleshall	2019	ro.uow.edu.au/theses1/554	530000	8000	SRM KN-5-2	1	ANSTO	530000	8000	3040000	500000	KN-4-2	1	ANSTO	3040000	500000
ECC2019_WD-FS1	WD-FS1	Eccleshall	2019	ro.uow.edu.au/theses1/554	430000	6000	SRM KN-5-2	1	ANSTO	430000	6000	2390000	610000	KN-4-2	1	ANSTO	2390000	610000
ECC2019_WN1	WN1	Eccleshall	2019	ro.uow.edu.au/theses1/554	1420000	24000	SRM KN-5-2	1	ANSTO	1420000	24000	5090000	520000	KN-4-2	1	ANSTO	5090000	520000
FER2014_LO18-4	LO18-4	Fernandes	2014	AGU Abstract ID: EP23A-3585	203935	5395	07KNSTD	1	LLNL-CAMS	203935	5395	1.27683e+06	44142.7	KNSTD	1	PRIME	1.27683e+06	44142.7
FER2014_LO18-5	LO18-5	Fernandes	2014	AGU Abstract ID: EP23A-3585	110853	3048	07KNSTD	1	LLNL-CAMS	110853	3048	757512	51053.5	KNSTD	1	PRIME	757512	51053.5
FUL2020_BlnG	BlnG	Fulop	2020	10.1126/sciadv.aaz8845	268750	7230	SRM KN-5-2	1	ANSTO	268750	7230	1524020	324760	KN-4-2	1	ANSTO	1524020	324760
FUL2020_BrwW	BrwW	Fulop	2020	10.1126/sciadv.aaz8845	318780	9490	SRM KN-5-2	1	ANSTO	318780	9490	1298130	71940	KN-4-2	1	ANSTO	1298130	71940
FUL2020_ClgC	ClgC	Fulop	2020	10.1126/sciadv.aaz8845	598570	16080	SRM KN-5-2	1	ANSTO	598570	16080	2990750	149050	KN-4-2	1	ANSTO	2990750	149050
FUL2020_CstC	CstC	Fulop	2020	10.1126/sciadv.aaz8845	396020	10650	SRM KN-5-2	1	ANSTO	396020	10650	2111650	121290	KN-4-2	1	ANSTO	2111650	121290
FUL2020_CstG	CstG	Fulop	2020	10.1126/sciadv.aaz8845	541360	14550	SRM KN-5-2	1	ANSTO	541360	14550	2957360	153370	KN-4-2	1	ANSTO	2957360	153370
FUL2020_DrlB	DrlB	Fulop	2020	10.1126/sciadv.aaz8845	342390	9210	SRM KN-5-2	1	ANSTO	342390	9210	1463790	84930	KN-4-2	1	ANSTO	1463790	84930
FUL2020_DrlP	DrlP	Fulop	2020	10.1126/sciadv.aaz8845	333320	9900	SRM KN-5-2	1	ANSTO	333320	9900	1271430	66710	KN-4-2	1	ANSTO	1271430	66710
FUL2020_DrlT	DrlT	Fulop	2020	10.1126/sciadv.aaz8845	354880	9540	SRM KN-5-2	1	ANSTO	354880	9540	1410400	82050	KN-4-2	1	ANSTO	1410400	82050
FUL2020_DrlW	DrlW	Fulop	2020	10.1126/sciadv.aaz8845	480440	15230	SRM KN-5-2	1	ANSTO	480440	15230	2.08268e+06	111810	KN-4-2	1	ANSTO	2.08268e+06	111810
FUL2020_GTG	GTG	Fulop	2020	10.1126/sciadv.aaz8845	404620	15610	SRM KN-5-2	1	ANSTO	404620	15610	2446530	142170	KN-4-2	1	ANSTO	2446530	142170
FUL2020_GwyB	GwyB	Fulop	2020	10.1126/sciadv.aaz8845	455850	16570	SRM KN-5-2	1	ANSTO	455850	16570	2803840	138450	KN-4-2	1	ANSTO	2803840	138450
FUL2020_LchR	LchR	Fulop	2020	10.1126/sciadv.aaz8845	559310	15570	SRM KN-5-2	1	ANSTO	559310	15570	3377950	177940	KN-4-2	1	ANSTO	3377950	177940
FUL2020_MbgDP-b	MbgDP-b	Fulop	2020	10.1126/sciadv.aaz8845	389380	13380	SRM KN-5-2	1	ANSTO	389380	13380	2349040	152900	KN-4-2	1	ANSTO	2349040	152900
FUL2020_MbgG	MbgG	Fulop	2020	10.1126/sciadv.aaz8845	362250	12440	SRM KN-5-2	1	ANSTO	362250	12440	2126330	132190	KN-4-2	1	ANSTO	2126330	132190
FUL2020_MbgLP-1	MbgLP-1	Fulop	2020	10.1126/sciadv.aaz8845	732640	41970	SRM KN-5-2	1	ANSTO	732640	41970	4391960	257310	KN-4-2	1	ANSTO	4391960	257310
FUL2020_MbgLP-2	MbgLP-2	Fulop	2020	10.1126/sciadv.aaz8845	762300	36490	SRM KN-5-2	1	ANSTO	762300	36490	4578280	287500	KN-4-2	1	ANSTO	4578280	287500
FUL2020_MbgW	MbgW	Fulop	2020	10.1126/sciadv.aaz8845	440430	15130	SRM KN-5-2	1	ANSTO	440430	15130	2467560	163530	KN-4-2	1	ANSTO	2467560	163530
FUL2020_McnB	McnB	Fulop	2020	10.1126/sciadv.aaz8845	386970	10140	SRM KN-5-2	1	ANSTO	386970	10140	2280570	125790	KN-4-2	1	ANSTO	2280570	125790
FUL2020_McqD	McqD	Fulop	2020	10.1126/sciadv.aaz8845	478260	13350	SRM KN-5-2	1	ANSTO	478260	13350	2691030	154540	KN-4-2	1	ANSTO	2691030	154540
FUL2020_MrnM	MrnM	Fulop	2020	10.1126/sciadv.aaz8845	215750	5810	SRM KN-5-2	1	ANSTO	215750	5810	1379700	77520	KN-4-2	1	ANSTO	1379700	77520
FUL2020_MrrB	MrrB	Fulop	2020	10.1126/sciadv.aaz8845	721130	19370	SRM KN-5-2	1	ANSTO	721130	19370	3546100	189330	KN-4-2	1	ANSTO	3546100	189330
FUL2020_MrtC	MrtC	Fulop	2020	10.1126/sciadv.aaz8845	585070	15720	SRM KN-5-2	1	ANSTO	585070	15720	2835710	153410	KN-4-2	1	ANSTO	2835710	153410
FUL2020_Mry-Drl	Mry-Drl	Fulop	2020	10.1126/sciadv.aaz8845	305280	15650	SRM KN-5-2	1	ANSTO	446900	16230	1600620	169870	KN-4-2	1	ANSTO	1745110	99550
FUL2020_MryAW	MryAW	Fulop	2020	10.1126/sciadv.aaz8845	446900	16230	SRM KN-5-2	1	ANSTO	305280	15650	1745110	99550	KN-4-2	1	ANSTO	1600620	169870
FUL2020_MryL	MryL	Fulop	2020	10.1126/sciadv.aaz8845	393250	11030	SRM KN-5-2	1	ANSTO	393250	11030	1715500	101180	KN-4-2	1	ANSTO	1715500	101180
FUL2020_PPC	PPC	Fulop	2020	10.1126/sciadv.aaz8845	521970	23790	SRM KN-5-2	1	ANSTO	521970	23790	3165630	182850	KN-4-2	1	ANSTO	3165630	182850
FUL2020_ProE	ProE	Fulop	2020	10.1126/sciadv.aaz8845	731180	19640	SRM KN-5-2	1	ANSTO	731180	19640	2846440	251380	KN-4-2	1	ANSTO	2846440	251380
FUL2020_ProW	ProW	Fulop	2020	10.1126/sciadv.aaz8845	871040	23390	SRM KN-5-2	1	ANSTO	871040	23390	3999090	203940	KN-4-2	1	ANSTO	3999090	203940
FUL2020_SnwCP	SnwCP	Fulop	2020	10.1126/sciadv.aaz8845	586610	31440	SRM KN-5-2	1	ANSTO	586610	31440	3401760	185020	KN-4-2	1	ANSTO	3401760	185020
FUL2020_SnwMK	SnwMK	Fulop	2020	10.1126/sciadv.aaz8845	330120	16030	SRM KN-5-2	1	ANSTO	330120	16030	1971570	273120	KN-4-2	1	ANSTO	1971570	273120
FUL2020_SPC	SPC	Fulop	2020	10.1126/sciadv.aaz8845	653010	31030	SRM KN-5-2	1	ANSTO	653010	31030	4258120	241990	KN-4-2	1	ANSTO	4258120	241990
FUL2020_SWP	SWP	Fulop	2020	10.1126/sciadv.aaz8845	234640	12120	SRM KN-5-2	1	ANSTO	234640	12120	1453170	88460	KN-4-2	1	ANSTO	1453170	88460
FUL2020_TBW	TBW	Fulop	2020	10.1126/sciadv.aaz8845	421700	11040	SRM KN-5-2	1	ANSTO	421700	11040	1932610	108340	KN-4-2	1	ANSTO	1932610	108340
FUL2020_WrgD	WrgD	Fulop	2020	10.1126/sciadv.aaz8845	309470	8330	SRM KN-5-2	1	ANSTO	309470	8330	1674170	151020	KN-4-2	1	ANSTO	1674170	151020
FUL2020_WrgG	WrgG	Fulop	2020	10.1126/sciadv.aaz8845	618050	16610	SRM KN-5-2	1	ANSTO	618050	16610	2692390	163630	KN-4-2	1	ANSTO	2692390	163630
GRI2018_mod5001	mod5001	Grin	2018	10.1016/j.geomorph.2018.08.007	38720	1880	07KNSTD	1	Cologne	38720	1880	201700	17000	KNSTD	1	ANSTO	201700	17000
GRI2018_mod5003	mod5003	Grin	2018	10.1016/j.geomorph.2018.08.007	70210	2630	07KNSTD	1	Cologne	70210	2630	482000	40000	KNSTD	1	ANSTO	482000	40000
GRI2018_mod5004	mod5004	Grin	2018	10.1016/j.geomorph.2018.08.007	15420	1100	07KNSTD	1	Cologne	15420	1100	102800	17000	KNSTD	1	ANSTO	102800	17000
GRI2018_mod6001	mod6001	Grin	2018	10.1016/j.geomorph.2018.08.007	16760	1000	07KNSTD	1	Cologne	16760	1000	123300	16500	KNSTD	1	ANSTO	123300	16500
GRI2018_mod6002	mod6002	Grin	2018	10.1016/j.geomorph.2018.08.007	19050	1110	07KNSTD	1	Cologne	19050	1110	125100	17800	KNSTD	1	ANSTO	125100	17800
GRI2018_mod6004	mod6004	Grin	2018	10.1016/j.geomorph.2018.08.007	25150	1470	07KNSTD	1	Cologne	25150	1470	190800	27900	KNSTD	1	ANSTO	190800	27900
GRI2018_mod6005	mod6005	Grin	2018	10.1016/j.geomorph.2018.08.007	23010	1760	07KNSTD	1	Cologne	23010	1760	157500	17600	KNSTD	1	ANSTO	157500	17600
GRI2018_mod7003	mod7003	Grin	2018	10.1016/j.geomorph.2018.08.007	16890	1290	07KNSTD	1	Cologne	16890	1290	107100	18900	KNSTD	1	ANSTO	107100	18900
GRI2018_mod7005	mod7005	Grin	2018	10.1016/j.geomorph.2018.08.007	23120	1520	07KNSTD	1	Cologne	23120	1520	138200	22200	KNSTD	1	ANSTO	138200	22200
GRI2018_mod7006	mod7006	Grin	2018	10.1016/j.geomorph.2018.08.007	21950	1820	07KNSTD	1	Cologne	21950	1820	102400	17100	KNSTD	1	ANSTO	102400	17100
HAT2019_C2	C2	Hattanji	2019	10.1016/j.geomorph.2018.12.022	55900	5600	07KNSTD	1	MALT Tokyo	55900	5600	378000	37000	KNSTD	1	MALT Tokyo	378000	37000
HAT2019_S2	S2	Hattanji	2019	10.1016/j.geomorph.2018.12.022	41700	7900	07KNSTD	1	MALT Tokyo	41700	7900	436000	46000	KNSTD	1	MALT Tokyo	436000	46000
HAT2019_S3	S3	Hattanji	2019	10.1016/j.geomorph.2018.12.022	58900	3700	07KNSTD	1	MALT Tokyo	58900	3700	499000	42000	KNSTD	1	MALT Tokyo	499000	42000
HEI1997_Creek1a	Creek1a	Heimsath	1997	10.1038/41056	63000	5000	KNSTD	0.9042	LLNL-CAMS	56964.6	4521	414000	53000	NBS	1	LLNL-CAMS	414000	53000
HEI1997_Creek1b	Creek1b	Heimsath	1997	10.1038/41056	63000	6000	KNSTD	0.9042	LLNL-CAMS	56964.6	5425.2	366000	50000	NBS	1	LLNL-CAMS	366000	50000
HEI1997_Creek2	Creek2	Heimsath	1997	10.1038/41056	41000	5000	KNSTD	0.9042	LLNL-CAMS	37072.2	4521	239000	49000	NBS	1	LLNL-CAMS	239000	49000
HID2014_1 modern post-dam	1 modern post-dam	Hidy	2014	10.1016/j.epsl.2014.01.011	214000	6000	07KNSTD3110	1	LLNL-CAMS	214000	6000	1166000	70000	KNSTD10650	1	LLNL-CAMS	1166000	70000
HID2014_12 modern pre-dam	12 modern pre-dam	Hidy	2014	10.1016/j.epsl.2014.01.011	84000	3000	07KNSTD3110	1	LLNL-CAMS	84000	3000	513000	40000	KNSTD10650	1	LLNL-CAMS	513000	40000
HID2014_6 modern post-dam	6 modern post-dam	Hidy	2014	10.1016/j.epsl.2014.01.011	252000	8000	07KNSTD3110	1	LLNL-CAMS	252000	8000	1489000	100000	KNSTD10650	1	LLNL-CAMS	1489000	100000
HID2014_8 modern pre-dam	8 modern pre-dam	Hidy	2014	10.1016/j.epsl.2014.01.011	223000	6000	07KNSTD3110	1	LLNL-CAMS	223000	6000	1388000	84000	KNSTD10650	1	LLNL-CAMS	1388000	84000
HIP2012_sample_18-2	sample_18-2	Hippe	2012	10.1016/j.geomorph.2012.07.031	1830118	75160	S2007N	1	ETH-Zurich	1830118	75160	18740000	1010000	ZAL94N	1	ETH-Zurich	18740000	1010000
HIP2012_sample_18-4	sample_18-4	Hippe	2012	10.1016/j.geomorph.2012.07.031	7853660	235688	S2007N	1	ETH-Zurich	7853660	235688	45690000	2070000	ZAL94N	1	ETH-Zurich	45690000	2070000
HIP2012_sample_18-6	sample_18-6	Hippe	2012	10.1016/j.geomorph.2012.07.031	5182940	155670	S2007N	1	ETH-Zurich	5182940	155670	37920000	1690000	ZAL94N	1	ETH-Zurich	37920000	1690000
HIP2012_sample_18-7	sample_18-7	Hippe	2012	10.1016/j.geomorph.2012.07.031	4765080	142987	S2007N	1	ETH-Zurich	4765080	142987	30180000	1560000	ZAL94N	1	ETH-Zurich	30180000	1560000
HIP2012_sample_22-6	sample_22-6	Hippe	2012	10.1016/j.geomorph.2012.07.031	4268273	153961	S2007N	1	ETH-Zurich	4268273	153961	28140000	1570000	ZAL94N	1	ETH-Zurich	28140000	1570000
HIP2012_sample_24-1	sample_24-1	Hippe	2012	10.1016/j.geomorph.2012.07.031	4600448	138193	S2007N	1	ETH-Zurich	4600448	138193	28290000	1460000	ZAL94N	1	ETH-Zurich	28290000	1460000
HIP2012_sample_24-2	sample_24-2	Hippe	2012	10.1016/j.geomorph.2012.07.031	4842995	145357	S2007N	1	ETH-Zurich	4842995	145357	32980000	1400000	ZAL94N	1	ETH-Zurich	32980000	1400000
HIP2012_sample_24-3	sample_24-3	Hippe	2012	10.1016/j.geomorph.2012.07.031	1364642	90220	S2007N	1	ETH-Zurich	1364642	90220	8650000	69000	ZAL94N	1	ETH-Zurich	8650000	69000
HIP2012_sample_24-4	sample_24-4	Hippe	2012	10.1016/j.geomorph.2012.07.031	954914	31660	S2007N	1	ETH-Zurich	954914	31660	8310000	540000	ZAL94N	1	ETH-Zurich	8310000	540000
HIP2012_sample_24-6	sample_24-6	Hippe	2012	10.1016/j.geomorph.2012.07.031	4109264	123333	S2007N	1	ETH-Zurich	4109264	123333	29850000	1710000	ZAL94N	1	ETH-Zurich	29850000	1710000
HIP2012_sample_25-2	sample_25-2	Hippe	2012	10.1016/j.geomorph.2012.07.031	1938420	62111	S2007N	1	ETH-Zurich	1938420	62111	12670000	710000	ZAL94N	1	ETH-Zurich	12670000	710000
HIP2012_sample_25-3	sample_25-3	Hippe	2012	10.1016/j.geomorph.2012.07.031	5687003	216146	S2007N	1	ETH-Zurich	5687003	216146	39930000	2260000	ZAL94N	1	ETH-Zurich	39930000	2260000
HIP2012_sample_25-4	sample_25-4	Hippe	2012	10.1016/j.geomorph.2012.07.031	2681324	80490	S2007N	1	ETH-Zurich	2681324	80490	17600000	1010000	ZAL94N	1	ETH-Zurich	17600000	1010000
HUB2021_L1	L1	Hubert-Ferrari	2021	10.1007/s42990-021-00057-6	150505	2272	NIST SRM	1	ASTER	150505	2272	84977	49248	KNSTD	1	ASTER	44697	34742
HUB2021_L10	L10	Hubert-Ferrari	2021	10.1007/s42990-021-00057-6	16786	4864	NIST SRM	1	ASTER	16786	4864	86702	43605	KNSTD	1	ASTER	84977	49248
HUB2021_L2	L2	Hubert-Ferrari	2021	10.1007/s42990-021-00057-6	52693	8970	NIST SRM	1	ASTER	52693	8970	69295	49123	KNSTD	1	ASTER	86702	43605
HUB2021_L5	L5	Hubert-Ferrari	2021	10.1007/s42990-021-00057-6	37050	4849	NIST SRM	1	ASTER	37050	4849	20939	12135	KNSTD	1	ASTER	69295	49123
HUB2021_L6	L6	Hubert-Ferrari	2021	10.1007/s42990-021-00057-6	11702	1612	NIST SRM	1	ASTER	11702	1612	173033	77873	KNSTD	1	ASTER	20939	12135
HUB2021_L8	L8	Hubert-Ferrari	2021	10.1007/s42990-021-00057-6	25972	1791	NIST SRM	1	ASTER	25972	1791	172300	37000	KNSTD	1	ASTER	173033	77873
INS2010_Ins-N04	Ins-N04	Insel	2010	10.1016/j.geomorph.2010.05.014	36400	1800	KNSTD	0.9042	PRIME	32912.9	1627.56	172300	37000	KNSTD	1	PRIME	172300	37000
INS2010_Ins-N05	Ins-N05	Insel	2010	10.1016/j.geomorph.2010.05.014	51100	3500	KNSTD	0.9042	PRIME	46204.6	3164.7	316800	47300	KNSTD	1	PRIME	316800	47300
INS2010_Ins-N06	Ins-N06	Insel	2010	10.1016/j.geomorph.2010.05.014	54700	2100	KNSTD	0.9042	PRIME	49459.7	1898.82	238200	36800	KNSTD	1	PRIME	238200	36800
INS2010_Ins-S08	Ins-S08	Insel	2010	10.1016/j.geomorph.2010.05.014	16300	1300	KNSTD	0.9042	PRIME	14738.5	1175.46	58500	23600	KNSTD	1	PRIME	58500	23600
INS2010_Ins-S09	Ins-S09	Insel	2010	10.1016/j.geomorph.2010.05.014	15600	1300	KNSTD	0.9042	PRIME	14105.5	1175.46	52900	29600	KNSTD	1	PRIME	52900	29600
INS2010_Ins-S10	Ins-S10	Insel	2010	10.1016/j.geomorph.2010.05.014	30200	1700	KNSTD	0.9042	PRIME	27306.8	1537.14	108200	34100	KNSTD	1	PRIME	108200	34100
INS2010_Ins-S12	Ins-S12	Insel	2010	10.1016/j.geomorph.2010.05.014	26200	1500	KNSTD	0.9042	PRIME	23690	1356.3	133800	32500	KNSTD	1	PRIME	133800	32500
INS2010_Ins-S15	Ins-S15	Insel	2010	10.1016/j.geomorph.2010.05.014	12900	900	KNSTD	0.9042	PRIME	11664.2	813.78	46500	30800	KNSTD	1	PRIME	46500	30800
KIR2010_SV08-1	SV08-1	Kirby	2010	Bibcode: 2010AGUFMEP44A..05K	593000	11100	07KNSTD3110	1	LLNL-CAMS	593000	11100	4.01696e+06	120496	KNSTD	1	PRIME	4.01696e+06	120496
KIR2010_SV08-12	SV08-12	Kirby	2010	Bibcode: 2010AGUFMEP44A..05K	23193.6	625.556	07KNSTD3110	1	LLNL-CAMS	23193.6	625.556	163054	16052.5	KNSTD	1	PRIME	163054	16052.5
KIR2010_SV08-13	SV08-13	Kirby	2010	Bibcode: 2010AGUFMEP44A..05K	65960.6	1903	07KNSTD3110	1	LLNL-CAMS	65960.6	1903	419054	22561.7	KNSTD	1	PRIME	419054	22561.7
KIR2010_SV08-3	SV08-3	Kirby	2010	Bibcode: 2010AGUFMEP44A..05K	207635	4726.15	07KNSTD3110	1	LLNL-CAMS	207635	4726.15	1.43645e+06	37701.9	KNSTD	1	PRIME	1.43645e+06	37701.9
KIR2010_SV08-4	SV08-4	Kirby	2010	Bibcode: 2010AGUFMEP44A..05K	371511	8413.04	07KNSTD3110	1	LLNL-CAMS	371511	8413.04	2.49242e+06	64201.1	KNSTD	1	PRIME	2.49242e+06	64201.1
KIR2010_SV08-7	SV08-7	Kirby	2010	Bibcode: 2010AGUFMEP44A..05K	29500	1150	07KNSTD3110	1	LLNL-CAMS	29500	1150	219936	22142.6	KNSTD	1	PRIME	219936	22142.6
KOB2009_LL1	LL1	Kober	2009	10.1002/esp.1748	1069000	56000	S555	0.9124	ETH-Zurich	975356	51094	4010000	320000	ZAL94	0.9134	ETH-Zurich	3662734	292288
KOB2009_LL1c	LL1c	Kober	2009	10.1002/esp.1748	1258000	106000	S555	0.9124	ETH-Zurich	1147799	96714	7560000	550000	ZAL94	0.9134	ETH-Zurich	6905304	502370
KOB2009_LL3b	LL3b	Kober	2009	10.1002/esp.1748	868000	45000	S555	0.9124	ETH-Zurich	791963	41058	4920000	490000	ZAL94	0.9134	ETH-Zurich	4493928	447566
KOB2009_LL4	LL4	Kober	2009	10.1002/esp.1748	2435000	306000	S555	0.9124	ETH-Zurich	2221694	279194	11430000	470000	ZAL94	0.9134	ETH-Zurich	10440162	429298
KOB2009_LL5	LL5	Kober	2009	10.1002/esp.1748	2373000	149000	S555	0.9124	ETH-Zurich	2165125	135948	10810000	1120000	ZAL94	0.9134	ETH-Zurich	9873854	1023008
KOB2015_RG-01	RG-01	Kober	2015	10.1016/j.tecto.2015.06.037	110870	4689.84	S2007N	1	ETH-Zurich	110870	4689.84	661671	60266.5	ZAL94N	1	ETH-Zurich	661671	60266.5
KOB2015_RG-03	RG-03	Kober	2015	10.1016/j.tecto.2015.06.037	6254.6	1098.75	S2007N	1	ETH-Zurich	6254.6	1098.75	67634.1	12942.9	ZAL94N	1	ETH-Zurich	67634.1	12942.9
KOB2015_RG-05	RG-05	Kober	2015	10.1016/j.tecto.2015.06.037	13590.7	1375.11	S2007N	1	ETH-Zurich	13590.7	1375.11	129900	17710.7	ZAL94N	1	ETH-Zurich	129900	17710.7
KOB2015_RG-06	RG-06	Kober	2015	10.1016/j.tecto.2015.06.037	5807.29	1422.73	S2007N	1	ETH-Zurich	5807.29	1422.73	55035.6	15990.7	ZAL94N	1	ETH-Zurich	55035.6	15990.7
KOB2015_RG-07	RG-07	Kober	2015	10.1016/j.tecto.2015.06.037	20071.3	2319.1	S2007N	1	ETH-Zurich	20071.3	2319.1	143097	21048.4	ZAL94N	1	ETH-Zurich	143097	21048.4
KOB2015_RG-11	RG-11	Kober	2015	10.1016/j.tecto.2015.06.037	120715	4537.19	S2007N	1	ETH-Zurich	120715	4537.19	1.09623e+06	87533.7	ZAL94N	1	ETH-Zurich	1.09623e+06	87533.7
KOB2015_RG-15	RG-15	Kober	2015	10.1016/j.tecto.2015.06.037	177849	9383.57	S2007N	1	ETH-Zurich	177849	9383.57	888356	72584.7	ZAL94N	1	ETH-Zurich	888356	72584.7
KOB2015_RG-16	RG-16	Kober	2015	10.1016/j.tecto.2015.06.037	317459	8806.8	S2007N	1	ETH-Zurich	317459	8806.8	2.31224e+06	176095	ZAL94N	1	ETH-Zurich	2.31224e+06	176095
KOB2015_RG-17	RG-17	Kober	2015	10.1016/j.tecto.2015.06.037	332177	10424.6	S2007N	1	ETH-Zurich	332177	10424.6	1.97285e+06	113349	ZAL94N	1	ETH-Zurich	1.97285e+06	113349
KOB2015_RG-22	RG-22	Kober	2015	10.1016/j.tecto.2015.06.037	1.07809e+06	16171.2	S2007N	1	ETH-Zurich	1.07809e+06	16171.2	6.21379e+06	473228	ZAL94N	1	ETH-Zurich	6.21379e+06	473228
KOB2015_RG-27	RG-27	Kober	2015	10.1016/j.tecto.2015.06.037	151716	6042.37	S2007N	1	ETH-Zurich	151716	6042.37	511124	48974.7	ZAL94N	1	ETH-Zurich	511124	48974.7
KOB2015_RG-33	RG-33	Kober	2015	10.1016/j.tecto.2015.06.037	215478	7266.24	S2007N	1	ETH-Zurich	215478	7266.24	1.54547e+06	98182.7	ZAL94N	1	ETH-Zurich	1.54547e+06	98182.7
KOB2015_RG-39	RG-39	Kober	2015	10.1016/j.tecto.2015.06.037	44304.2	2552.35	S2007N	1	ETH-Zurich	44304.2	2552.35	466912	78763	ZAL94N	1	ETH-Zurich	466912	78763
KOB2015_RG-40	RG-40	Kober	2015	10.1016/j.tecto.2015.06.037	211653	6822.98	S2007N	1	ETH-Zurich	211653	6822.98	1.34466e+06	84242.8	ZAL94N	1	ETH-Zurich	1.34466e+06	84242.8
KOB2015_RG-45	RG-45	Kober	2015	10.1016/j.tecto.2015.06.037	31963.8	2658.44	S2007N	1	ETH-Zurich	31963.8	2658.44	218103	34219.3	ZAL94N	1	ETH-Zurich	218103	34219.3
KOB2015_RG-47	RG-47	Kober	2015	10.1016/j.tecto.2015.06.037	150600	5386.69	S2007N	1	ETH-Zurich	150600	5386.69	833821	73589.1	ZAL94N	1	ETH-Zurich	833821	73589.1
KOB2015_RG-57	RG-57	Kober	2015	10.1016/j.tecto.2015.06.037	437095	10055	S2007N	1	ETH-Zurich	437095	10055	2.63155e+06	174180	ZAL94N	1	ETH-Zurich	2.63155e+06	174180
MAS2018_PAN10	PAN10	Mason	2018	10.1016/j.epsl.2018.03.056	362733	8772	07KNSTD	1	PRIME	362733	8772	2225616	77950	KNSTD	1	PRIME	2225616	77950
MAS2018_PAN12	PAN12	Mason	2018	10.1016/j.epsl.2018.03.056	287452	16818	07KNSTD	1	PRIME	287452	16818	1637336	65025	KNSTD	1	PRIME	1637336	65025
MAT2014_As-1	As-1	Matsushi	2014	10.5110/jjseg.54.272	26319	1271	07KNSTD	1	MALT Tokyo	26319	1271	192922	13594	KNSTD	1	MALT Tokyo	192922	13594
MAT2014_As-10	As-10	Matsushi	2014	10.5110/jjseg.54.272	16619	1153	07KNSTD	1	MALT Tokyo	16619	1153	106189	10364	KNSTD	1	MALT Tokyo	106189	10364
MAT2014_As-2	As-2	Matsushi	2014	10.5110/jjseg.54.272	25277	1189	07KNSTD	1	MALT Tokyo	25277	1189	212072	15552	KNSTD	1	MALT Tokyo	212072	15552
MAT2014_As-3	As-3	Matsushi	2014	10.5110/jjseg.54.272	25977	2580	07KNSTD	1	MALT Tokyo	25977	2580	226553	18574	KNSTD	1	MALT Tokyo	226553	18574
MAT2014_As-4	As-4	Matsushi	2014	10.5110/jjseg.54.272	6675	592	07KNSTD	1	MALT Tokyo	6675	592	47149	4427	KNSTD	1	MALT Tokyo	47149	4427
MAT2014_As-5	As-5	Matsushi	2014	10.5110/jjseg.54.272	12962	935	07KNSTD	1	MALT Tokyo	12962	935	55721	6057	KNSTD	1	MALT Tokyo	55721	6057
MAT2014_As-6	As-6	Matsushi	2014	10.5110/jjseg.54.272	16658	924	07KNSTD	1	MALT Tokyo	16658	924	108650	9693	KNSTD	1	MALT Tokyo	108650	9693
MAT2014_As-7	As-7	Matsushi	2014	10.5110/jjseg.54.272	6251	712	07KNSTD	1	MALT Tokyo	6251	712	46193	4808	KNSTD	1	MALT Tokyo	46193	4808
MAT2014_As-8	As-8	Matsushi	2014	10.5110/jjseg.54.272	10369	1460	07KNSTD	1	MALT Tokyo	10369	1460	72161	7396	KNSTD	1	MALT Tokyo	72161	7396
MAT2014_As-9	As-9	Matsushi	2014	10.5110/jjseg.54.272	33881	1889	07KNSTD	1	MALT Tokyo	33881	1889	293796	22756	KNSTD	1	MALT Tokyo	293796	22756
MAT2014_Tk-1	Tk-1	Matsushi	2014	10.5110/jjseg.54.272	19834	1528	07KNSTD	1	MALT Tokyo	19834	1528	169272	17337	KNSTD	1	MALT Tokyo	169272	17337
MAT2014_Tk-2	Tk-2	Matsushi	2014	10.5110/jjseg.54.272	8107	955	07KNSTD	1	MALT Tokyo	8107	955	46152	5020	KNSTD	1	MALT Tokyo	46152	5020
MAT2014_Tk-3	Tk-3	Matsushi	2014	10.5110/jjseg.54.272	25858	1358	07KNSTD	1	MALT Tokyo	25858	1358	165857	12840	KNSTD	1	MALT Tokyo	165857	12840
MAT2018_UGAB1	UGAB1	Matmon	2018	10.1016/j.geomorph.2018.04.008	1026000	39000	NIST SRM	1	ASTER	1026000	39000	5.64936e+06	280118	SMAL11	1.021	ASTER	5768000	286000
MAT2018_UGAB3	UGAB3	Matmon	2018	10.1016/j.geomorph.2018.04.008	799000	29000	NIST SRM	1	ASTER	799000	29000	4.9383e+06	244858	SMAL11	1.021	ASTER	5042000	250000
MAT2018_UGAB5	UGAB5	Matmon	2018	10.1016/j.geomorph.2018.04.008	796000	30000	NIST SRM	1	ASTER	796000	30000	4.79824e+06	254652	SMAL11	1.021	ASTER	4899000	260000
MCP2013_QVP-034	QVP-034	McPhillips	2013	10.1002/2013JF002837	127406	3112.89	NIST_27900	1	SUERC	127406	3112.89	938338	26098.5	KNSTD	1	PRIME	938338	26098.5
MOO2018_Cooksie	Cooksie	Moon	2018	10.1016/j.epsl.2018.09.006	7600	300	07KNSTD3110	1	PRIME	7600	300	40000	19000	KNSTD30960	0.993	PRIME	40000	19000
MOO2018_Fourmile	Fourmile	Moon	2018	10.1016/j.epsl.2018.09.007	12500	200	07KNSTD3110	1	LLNL-CAMS	12500	200	60000	16000	KNSTD30961	0.9825	LLNL-CAMS	60000	16000
MOO2018_Hardy	Hardy	Moon	2018	10.1016/j.epsl.2018.09.008	23700	600	07KNSTD3110	1	LLNL-CAMS	23700	600	170000	17000	KNSTD30962	0.972	LLNL-CAMS	170000	17000
MOO2018_Horse Mtn	Horse Mtn	Moon	2018	10.1016/j.epsl.2018.09.009	53700	2300	07KNSTD3110	1	PRIME	53700	2300	80000	40000	KNSTD30963	0.9615	PRIME	80000	40000
MOO2018_Howard	Howard	Moon	2018	10.1016/j.epsl.2018.09.010	15100	400	07KNSTD3110	1	PRIME	15100	400	90000	11000	KNSTD30964	0.951	PRIME	90000	11000
MOO2018_Juan	Juan	Moon	2018	10.1016/j.epsl.2018.09.011	17900	400	07KNSTD3110	1	PRIME	17900	400	110000	13000	KNSTD30965	0.9405	PRIME	110000	13000
NAK2014_ABK-R1	ABK-R1	Nakamura	2014	10.1186/2197-4284-1-9	69600	3600	07KNSTD	1	MALT Tokyo AMS	69600	3600	529000	52000	KNSTD	1	MALT Tokyo	529000	52000
NAK2014_ABK-R3	ABK-R3	Nakamura	2014	10.1186/2197-4284-1-9	48000	2200	07KNSTD	1	MALT Tokyo AMS	48000	2200	316000	26000	KNSTD	1	MALT Tokyo	316000	26000
NIC2011_GC-74	GC-74	Nichols	2011	N/A - GSA Abstract 2011 Annual Meeting	94300	1900	07KNSTD	1	LLNL-CAMS	94300	1900	648416	32054.4	KNSTD	1	PRIME	648416	32054.4
NIC2011_GCHC-78	GCHC-78	Nichols	2011	N/A - GSA Abstract 2011 Annual Meeting	114000	2700	07KNSTD	1	LLNL-CAMS	114000	2700	829863	54278	KNSTD	1	PRIME	829863	54278
NIC2011_GCMC-93	GCMC-93	Nichols	2011	N/A - GSA Abstract 2011 Annual Meeting	50200	1100	07KNSTD	1	LLNL-CAMS	50200	1100	372822	15203.6	KNSTD	1	PRIME	372822	15203.6
NIC2011_GCPR-0	GCPR-0	Nichols	2011	N/A - GSA Abstract 2011 Annual Meeting	46800	1100	07KNSTD	1	LLNL-CAMS	46800	1100	332388	20285.4	KNSTD	1	PRIME	332388	20285.4
NIC2011_GCSC-190	GCSC-190	Nichols	2011	N/A - GSA Abstract 2011 Annual Meeting	82300	1900	07KNSTD	1	LLNL-CAMS	82300	1900	512253	27085.5	KNSTD	1	PRIME	512253	27085.5
NIC2011_GCSC-205	GCSC-205	Nichols	2011	N/A - GSA Abstract 2011 Annual Meeting	156000	4900	07KNSTD	1	LLNL-CAMS	156000	4900	1.12848e+06	49328.1	KNSTD	1	PRIME	1.12848e+06	49328.1
NIC2011_GCSC-92	GCSC-92	Nichols	2011	N/A - GSA Abstract 2011 Annual Meeting	65100	1400	07KNSTD	1	LLNL-CAMS	65100	1400	398272	27546.9	KNSTD	1	PRIME	398272	27546.9
NIC2011_GCTR-68	GCTR-68	Nichols	2011	N/A - GSA Abstract 2011 Annual Meeting	61900	1700	07KNSTD	1	LLNL-CAMS	61900	1700	450839	16279.7	KNSTD	1	PRIME	450839	16279.7
NIC2014_QLD 11	QLD 11	Nichols	2014	10.1016/j.geomorph.2014.07.019	189000	3000	07KNSTD3110	1	LLNL-CAMS	189000	3000	1.14163e+06	36835.1	KNSTD	1	PRIME	1.14163e+06	36835.1
NIC2014_QLD 14	QLD 14	Nichols	2014	10.1016/j.geomorph.2014.07.019	66000	2000	07KNSTD3110	1	LLNL-CAMS	66000	2000	461784	26253	KNSTD	1	PRIME	461784	26253
NIC2014_QLD 2	QLD 2	Nichols	2014	10.1016/j.geomorph.2014.07.019	172000	5000	07KNSTD3110	1	LLNL-CAMS	172000	5000	1.11462e+06	51540.6	KNSTD	1	PRIME	1.11462e+06	51540.6
NIC2014_QLD 4	QLD 4	Nichols	2014	10.1016/j.geomorph.2014.07.019	231000	1000	07KNSTD3110	1	LLNL-CAMS	231000	1000	651290	49172.9	KNSTD	1	PRIME	651290	49172.9
NIC2014_QLD 8	QLD 8	Nichols	2014	10.1016/j.geomorph.2014.07.019	197000	3000	07KNSTD3110	1	LLNL-CAMS	197000	3000	1.28316e+06	31704.3	KNSTD	1	PRIME	1.28316e+06	31704.3
POR2015_02-117-xf	02-117-xf	Portenga	2015	10.1016/j.geomorph.2014.09.027	78500	2600	07KNSTD	1	LLNL-CAMS	78500	2600	495874	21448.5	KNSTD	1	PRIME	495874	21448.5
POR2015_02-122-xf	02-122-xf	Portenga	2015	10.1016/j.geomorph.2014.09.027	38400	800	07KNSTD	1	LLNL-CAMS	38400	800	244624	14389.7	KNSTD	1	PRIME	244624	14389.7
POR2015_02-127-xf	02-127-xf	Portenga	2015	10.1016/j.geomorph.2014.09.027	21800	700	07KNSTD	1	LLNL-CAMS	21800	700	164421	15896.5	KNSTD	1	PRIME	164421	15896.5
POR2015_02-135-xf	02-135-xf	Portenga	2015	10.1016/j.geomorph.2014.09.027	41200	1100	07KNSTD	1	LLNL-CAMS	41200	1100	294960	21356.6	KNSTD	1	PRIME	294960	21356.6
POR2015_02-138-xf	02-138-xf	Portenga	2015	10.1016/j.geomorph.2014.09.027	47400	1000	07KNSTD	1	LLNL-CAMS	47400	1000	264088	16230.9	KNSTD	1	PRIME	264088	16230.9
POR2015_02-139-xf	02-139-xf	Portenga	2015	10.1016/j.geomorph.2014.09.027	35600	700	07KNSTD	1	LLNL-CAMS	35600	700	226982	11826.9	KNSTD	1	PRIME	226982	11826.9
POR2015_02-145-xf	02-145-xf	Portenga	2015	10.1016/j.geomorph.2014.09.027	45500	1000	07KNSTD	1	LLNL-CAMS	45500	1000	331342	28938.6	KNSTD	1	PRIME	331342	28938.6
POR2015_02-152-xf	02-152-xf	Portenga	2015	10.1016/j.geomorph.2014.09.027	76800	1500	07KNSTD	1	LLNL-CAMS	76800	1500	477501	20282.8	KNSTD	1	PRIME	477501	20282.8
POR2015_02-209-xf	02-209-xf	Portenga	2015	10.1016/j.geomorph.2014.09.027	31600	900	07KNSTD	1	LLNL-CAMS	31600	900	217864	16256.3	KNSTD	1	PRIME	217864	16256.3
POR2015_02-212-xf	02-212-xf	Portenga	2015	10.1016/j.geomorph.2014.09.027	24500	800	07KNSTD	1	LLNL-CAMS	24500	800	150006	13977.6	KNSTD	1	PRIME	150006	13977.6
POR2015_02-223-xf	02-223-xf	Portenga	2015	10.1016/j.geomorph.2014.09.027	56800	1400	07KNSTD	1	LLNL-CAMS	56800	1400	390658	24633.4	KNSTD	1	PRIME	390658	24633.4
POR2015_02-232-xf	02-232-xf	Portenga	2015	10.1016/j.geomorph.2014.09.027	142800	2700	07KNSTD	1	LLNL-CAMS	142800	2700	977301	35775.7	KNSTD	1	PRIME	977301	35775.7
POR2015_99-17-xf	99-17-xf	Portenga	2015	10.1016/j.geomorph.2014.09.027	93700	1500	07KNSTD	1	LLNL-CAMS	93700	1500	589766	19642	KNSTD	1	PRIME	589766	19642
POR2015_99-19-xf	99-19-xf	Portenga	2015	10.1016/j.geomorph.2014.09.027	73500	1300	07KNSTD	1	LLNL-CAMS	73500	1300	530845	19889.5	KNSTD	1	PRIME	530845	19889.5
POR2019_POT01	POT01	Portenga	2019	10.1130/B31840.1	283000	5500	07KNSTD	1	LLNL-CAMS	283000	5500	1.62169e+06	36162.4	KNSTD	1	PRIME	1.62169e+06	36162.4
POR2019_POT12	POT12	Portenga	2019	10.1130/B31840.1	500000	9600	07KNSTD	1	LLNL-CAMS	500000	9600	2.99462e+06	58734.7	KNSTD	1	PRIME	2.99462e+06	58734.7
POR2019_POT30	POT30	Portenga	2019	10.1130/B31840.1	309000	7400	07KNSTD	1	LLNL-CAMS	309000	7400	1.82303e+06	56068.8	KNSTD	1	PRIME	1.82303e+06	56068.8
POR2019_POT39	POT39	Portenga	2019	10.1130/B31840.1	554000	12800	07KNSTD	1	LLNL-CAMS	554000	12800	3.61825e+06	109755	KNSTD	1	PRIME	3.61825e+06	109755
POR2019_POT42	POT42	Portenga	2019	10.1130/B31840.1	1110000	18300	07KNSTD	1	LLNL-CAMS	1110000	18300	6.13003e+06	152323	KNSTD	1	PRIME	6.13003e+06	152323
POR2019_POT48	POT48	Portenga	2019	10.1130/B31840.1	873000	16500	07KNSTD	1	LLNL-CAMS	873000	16500	4.80454e+06	94548.1	KNSTD	1	PRIME	4.80454e+06	94548.1
POR2019_POT51	POT51	Portenga	2019	10.1130/B31840.1	379000	7300	07KNSTD	1	LLNL-CAMS	379000	7300	1.37528e+06	35480.7	KNSTD	1	PRIME	1.37528e+06	35480.7
POR2019_POT53	POT53	Portenga	2019	10.1130/B31840.1	572000	9600	07KNSTD	1	LLNL-CAMS	572000	9600	3.70268e+06	103604	KNSTD	1	PRIME	3.70268e+06	103604
POR2019_POT62	POT62	Portenga	2019	10.1130/B31840.1	307000	7600	07KNSTD	1	LLNL-CAMS	307000	7600	3.58355e+06	81837.8	KNSTD	1	PRIME	3.58355e+06	81837.8
POR2019_POT72	POT72	Portenga	2019	10.1130/B31840.1	246000	5800	07KNSTD	1	LLNL-CAMS	246000	5800	1.59181e+06	37072	KNSTD	1	PRIME	1.59181e+06	37072
REG2013_JP08003	JP08003	Regalla	2013	10.1016/j.geomorph.2013.04.029	50500	1300	07KNSTD	1	LLNL-CAMS	50500	1300	348074	13755.6	KNSTD	1	PRIME	348074	13755.6
REG2013_JP08004	JP08004	Regalla	2013	10.1016/j.geomorph.2013.04.029	50400	1200	07KNSTD	1	LLNL-CAMS	50400	1200	341479	18893	KNSTD	1	PRIME	341479	18893
REG2013_JP08014	JP08014	Regalla	2013	10.1016/j.geomorph.2013.04.029	73500	1700	07KNSTD	1	LLNL-CAMS	73500	1700	479315	17947.7	KNSTD	1	PRIME	479315	17947.7
REU2015_SAP03	SAP03	Reusser	2015	10.1130/G36272.1	624000	18000	07KNSTD	1	LLNL-CAMS	624000	18000	3.34843e+06	72820.6	KNSTD	1	PRIME	3.34843e+06	72820.6
REU2015_SAP04	SAP04	Reusser	2015	10.1130/G36272.1	550000	16000	07KNSTD	1	LLNL-CAMS	550000	16000	2.90067e+06	64279.1	KNSTD	1	PRIME	2.90067e+06	64279.1
REU2015_SAP12	SAP12	Reusser	2015	10.1130/G36272.1	555000	15000	07KNSTD	1	LLNL-CAMS	555000	15000	2.89635e+06	63742.7	KNSTD	1	PRIME	2.89635e+06	63742.7
REU2015_SAP15	SAP15	Reusser	2015	10.1130/G36272.1	638000	17000	07KNSTD	1	LLNL-CAMS	638000	17000	3.67339e+06	91364.7	KNSTD	1	PRIME	3.67339e+06	91364.7
REU2015_SAP17	SAP17	Reusser	2015	10.1130/G36272.1	281000	8000	07KNSTD	1	LLNL-CAMS	281000	8000	1.63876e+06	50701.4	KNSTD	1	PRIME	1.63876e+06	50701.4
REU2015_SAP36	SAP36	Reusser	2015	10.1130/G36272.1	442000	12000	07KNSTD	1	LLNL-CAMS	442000	12000	2.7824e+06	72016.9	KNSTD	1	PRIME	2.7824e+06	72016.9
REU2015_SAP39	SAP39	Reusser	2015	10.1130/G36272.1	635000	18000	07KNSTD	1	LLNL-CAMS	635000	18000	3.78598e+06	86745.4	KNSTD	1	PRIME	3.78598e+06	86745.4
REU2015_SAP44	SAP44	Reusser	2015	10.1130/G36272.1	1261000	29000	07KNSTD	1	LLNL-CAMS	1261000	29000	6.67535e+06	170547	KNSTD	1	PRIME	6.67535e+06	170547
REU2015_SAP49	SAP49	Reusser	2015	10.1130/G36272.1	528000	13000	07KNSTD	1	LLNL-CAMS	528000	13000	3.4265e+06	90898.2	KNSTD	1	PRIME	3.4265e+06	90898.2
REU2015_SAP63	SAP63	Reusser	2015	10.1130/G36272.1	364000	10000	07KNSTD	1	LLNL-CAMS	364000	10000	2.39792e+06	55883.8	KNSTD	1	PRIME	2.39792e+06	55883.8
REU2015_SAP65	SAP65	Reusser	2015	10.1130/G36272.1	618000	16000	07KNSTD	1	LLNL-CAMS	618000	16000	3.57716e+06	83105.6	KNSTD	1	PRIME	3.57716e+06	83105.6
REU2015_SAP68	SAP68	Reusser	2015	10.1130/G36272.1	513000	15000	07KNSTD	1	LLNL-CAMS	513000	15000	3.25007e+06	63494.9	KNSTD	1	PRIME	3.25007e+06	63494.9
REU2015_SAP69	SAP69	Reusser	2015	10.1130/G36272.1	329000	8000	07KNSTD	1	LLNL-CAMS	329000	8000	534367	20171	KNSTD	1	PRIME	534367	20171
SCH2016_CH-065	CH-065	Schmidt	2016	10.5194/esurf-4-819-2016	135000	4200	NIST_27900	1	SUERC	135000	4200	867179	30600.4	KNSTD	1	PRIME	867179	30600.4
SCH2016_CH-066	CH-066	Schmidt	2016	10.5194/esurf-4-819-2016	209000	4440	NIST_27900	1	SUERC	209000	4440	1.23814e+06	37715.9	KNSTD	1	PRIME	1.23814e+06	37715.9
SCH2016_CH-070	CH-070	Schmidt	2016	10.5194/esurf-4-819-2016	119000	5170	NIST_27900	1	SUERC	119000	5170	825009	31643.4	KNSTD	1	PRIME	825009	31643.4
SCH2016_CH-079	CH-079	Schmidt	2016	10.5194/esurf-4-819-2016	176000	8610	NIST_27900	1	SUERC	176000	8610	1.22331e+06	50929.5	KNSTD	1	PRIME	1.22331e+06	50929.5
SCH2016_CH-080	CH-080	Schmidt	2016	10.5194/esurf-4-819-2016	190000	4700	NIST_27900	1	SUERC	190000	4700	1.17653e+06	38433.5	KNSTD	1	PRIME	1.17653e+06	38433.5
SOS2016_BRA03	BRA03	Sosa-Gonzalez	2016	10.1016/j.geomorph.2016.04.025	62000	3000	07KNSTD	1	LLNL-CAMS	62000	3000	444076	20270.8	KNSTD	1	PRIME	444076	20270.8
SOS2016_BRA21	BRA21	Sosa-Gonzalez	2016	10.1016/j.geomorph.2016.04.025	241000	5000	07KNSTD	1	LLNL-CAMS	241000	5000	1.42032e+06	55782.1	KNSTD	1	PRIME	1.42032e+06	55782.1
SOS2016_BRA47	BRA47	Sosa-Gonzalez	2016	10.1016/j.geomorph.2016.04.025	238000	5000	07KNSTD	1	LLNL-CAMS	238000	5000	1.61898e+06	57212	KNSTD	1	PRIME	1.61898e+06	57212
SOS2016_C_NATA	C_NATA	Sosa-Gonzalez	2016	10.1016/j.geomorph.2016.04.025	137000	2600	07KNSTD	1	LLNL-CAMS	137000	2600	211807	27397.6	KNSTD	1	PRIME	211807	27397.6
SOS2016_CAIM	CAIM	Sosa-Gonzalez	2016	10.1016/j.geomorph.2016.04.025	95400	1800	07KNSTD	1	LLNL-CAMS	95400	1800	797065	28098.2	KNSTD	1	PRIME	797065	28098.2
SOS2016_CHAN	CHAN	Sosa-Gonzalez	2016	10.1016/j.geomorph.2016.04.025	39400	1200	07KNSTD	1	LLNL-CAMS	39400	1200	152243	15955.2	KNSTD	1	PRIME	152243	15955.2
SOS2016_CHVIE_H	CHVIE_H	Sosa-Gonzalez	2016	10.1016/j.geomorph.2016.04.025	36100	1300	07KNSTD	1	LLNL-CAMS	36100	1300	276672	23511	KNSTD	1	PRIME	276672	23511
SOS2016_CUL	CUL	Sosa-Gonzalez	2016	10.1016/j.geomorph.2016.04.025	13100	1000	07KNSTD	1	LLNL-CAMS	13100	1000	109839	17066	KNSTD	1	PRIME	109839	17066
SOS2016_GLOR	GLOR	Sosa-Gonzalez	2016	10.1016/j.geomorph.2016.04.025	35400	1500	07KNSTD	1	LLNL-CAMS	35400	1500	167878	17359.1	KNSTD	1	PRIME	167878	17359.1
SOS2016_IND	IND	Sosa-Gonzalez	2016	10.1016/j.geomorph.2016.04.025	66400	1800	07KNSTD	1	LLNL-CAMS	66400	1800	419428	20397.4	KNSTD	1	PRIME	419428	20397.4
SOS2016_PACORA	PACORA	Sosa-Gonzalez	2016	10.1016/j.geomorph.2016.04.025	10900	500	07KNSTD	1	LLNL-CAMS	10900	500	85020.9	9156.09	KNSTD	1	PRIME	85020.9	9156.09
SOS2016_PAN06	PAN06	Sosa-Gonzalez	2016	10.1016/j.geomorph.2016.04.025	36100	900	07KNSTD	1	LLNL-CAMS	36100	900	242245	13001.3	KNSTD	1	PRIME	242245	13001.3
SOS2016_PERE	PERE	Sosa-Gonzalez	2016	10.1016/j.geomorph.2016.04.025	112400	2100	07KNSTD	1	LLNL-CAMS	112400	2100	757775	28980.6	KNSTD	1	PRIME	757775	28980.6
SOS2017_CH-119	CH-119	Sosa-Gonzalez	2017	10.1002/esp.4205	81000	3000	NIST_27900	1	SUERC	81000	3000	502052	23615.7	KNSTD	1	PRIME	502052	23615.7
SOS2017_CH-129	CH-129	Sosa-Gonzalez	2017	10.1002/esp.4205	160000	4000	NIST_27900	1	SUERC	160000	4000	1.02008e+06	35939.5	KNSTD	1	PRIME	1.02008e+06	35939.5
STA2017_1	1	Starke	2017	10.1002/2016JF004153	640000	22000	07KNSTD	1	Univ of Köln	640000	22000	4379000	201000	KNSTD	1	Univ of Köln	4379000	201000
STA2017_10	10	Starke	2017	10.1002/2016JF004153	73000	4000	07KNSTD	1	Univ of Köln	73000	4000	542000	41000	KNSTD	1	Univ of Köln	542000	41000
STA2017_11	11	Starke	2017	10.1002/2016JF004153	782000	25000	07KNSTD	1	Univ of Köln	782000	25000	4925000	191000	KNSTD	1	Univ of Köln	4925000	191000
STA2017_15	15	Starke	2017	10.1002/2016JF004153	255000	10000	07KNSTD	1	Univ of Köln	255000	10000	1732000	88000	KNSTD	1	Univ of Köln	1732000	88000
STA2017_18	18	Starke	2017	10.1002/2016JF004153	3221000	100000	07KNSTD	1	Univ of Köln	3221000	100000	21385000	711000	KNSTD	1	Univ of Köln	21385000	711000
STA2017_2	2	Starke	2017	10.1002/2016JF004153	3170000	97000	07KNSTD	1	Univ of Köln	3170000	97000	949000	58000	KNSTD	1	Univ of Köln	949000	58000
STA2017_8	8	Starke	2017	10.1002/2016JF004153	760000	26000	07KNSTD	1	Univ of Köln	760000	26000	4930000	198000	KNSTD	1	Univ of Köln	4930000	198000
STA2017_9	9	Starke	2017	10.1002/2016JF004153	654000	22000	07KNSTD	1	Univ of Köln	654000	22000	4498000	183000	KNSTD	1	Univ of Köln	4498000	183000
STR2018_ALB1	ALB1	Struck	2018	10.5194/esurf-6-329-2018	1.33541e+06	31316.7	SRM KN-5-2	1	ANSTO	1335000	31000	5.58372e+06	382673	KN-4-2	1	ANSTO	5584000	383000
STR2018_ALB2	ALB2	Struck	2018	10.5194/esurf-6-329-2018	1.40427e+06	34168.1	SRM KN-5-2	1	ANSTO	1404000	34000	5.69718e+06	323919	KN-4-2	1	ANSTO	5697000	324000
STR2018_ALB3	ALB3	Struck	2018	10.5194/esurf-6-329-2018	1.42727e+06	37511.5	SRM KN-5-2	1	ANSTO	1427000	38000	6.34826e+06	353284	KN-4-2	1	ANSTO	6348000	353000
STR2018_COO	COO	Struck	2018	10.5194/esurf-6-329-2018	1695000	42000	SRM KN-5-2	1	ANSTO	1695000	42000	6868000	481000	KN-4-2	1	ANSTO	6868000	481000
STR2018_ELL	ELL	Struck	2018	10.5194/esurf-6-329-2018	461280	17113.3	SRM KN-5-2	1	ANSTO	461000	17000	2.35766e+06	113819	KN-4-2	1	ANSTO	2358000	114000
STR2018_FIN1	FIN1	Struck	2018	10.5194/esurf-6-329-2018	449848	15937.2	SRM KN-5-2	1	ANSTO	450000	16000	2.454e+06	122126	KN-4-2	1	ANSTO	2454000	122000
STR2018_FIN2	FIN2	Struck	2018	10.5194/esurf-6-329-2018	510342	14922.4	SRM KN-5-2	1	ANSTO	510000	15000	2.41207e+06	115580	KN-4-2	1	ANSTO	2412000	116000
STR2018_FIN3	FIN3	Struck	2018	10.5194/esurf-6-329-2018	547884	16439.7	SRM KN-5-2	1	ANSTO	548000	16000	2.74364e+06	132207	KN-4-2	1	ANSTO	2744000	132000
STR2018_FIN4	FIN4	Struck	2018	10.5194/esurf-6-329-2018	589916	16955.3	SRM KN-5-2	1	ANSTO	590000	17000	2.81263e+06	134780	KN-4-2	1	ANSTO	2813000	135000
STR2018_FIN5	FIN5	Struck	2018	10.5194/esurf-6-329-2018	582499	16268.7	SRM KN-5-2	1	ANSTO	582000	16000	2.53069e+06	124458	KN-4-2	1	ANSTO	2531000	124000
STR2018_HUG	HUG	Struck	2018	10.5194/esurf-6-329-2018	598044	17451.8	SRM KN-5-2	1	ANSTO	598000	17000	2.6564e+06	127820	KN-4-2	1	ANSTO	2656000	128000
STR2018_MAC	MAC	Struck	2018	10.5194/esurf-6-329-2018	1.61245e+06	38418.9	SRM KN-5-2	1	ANSTO	1612000	38000	4.83761e+06	466775	KN-4-2	1	ANSTO	4838000	467000
STR2018_NEA1	NEA1	Struck	2018	10.5194/esurf-6-329-2018	1.11087e+06	30979.6	SRM KN-5-2	1	ANSTO	1111000	31000	4.4602e+06	405025	KN-4-2	1	ANSTO	4460000	405000
STR2018_NEA2	NEA2	Struck	2018	10.5194/esurf-6-329-2018	699774	17357.1	SRM KN-5-2	1	ANSTO	700000	17000	3.29633e+06	257599	KN-4-2	1	ANSTO	3296000	258000
STR2018_NEA3	NEA3	Struck	2018	10.5194/esurf-6-329-2018	1.24644e+06	28941.6	SRM KN-5-2	1	ANSTO	1246000	29000	4.30685e+06	257694	KN-4-2	1	ANSTO	4307000	258000
STR2018_NEA4	NEA4	Struck	2018	10.5194/esurf-6-329-2018	281553	7107.32	SRM KN-5-2	1	ANSTO	282000	7000	1.64956e+06	87164.5	KN-4-2	1	ANSTO	1650000	87000
STR2018_NEA5	NEA5	Struck	2018	10.5194/esurf-6-329-2018	774199	19792.9	SRM KN-5-2	1	ANSTO	774000	20000	3.39953e+06	163832	KN-4-2	1	ANSTO	3400000	164000
STR2018_NIL	NIL	Struck	2018	10.5194/esurf-6-329-2018	495584	19337.2	SRM KN-5-2	1	ANSTO	496000	19000	3.00476e+06	148637	KN-4-2	1	ANSTO	3005000	149000
STR2018_OLA	OLA	Struck	2018	10.5194/esurf-6-329-2018	4.20021e+06	95187.1	SRM KN-5-2	1	ANSTO	4200000	95000	6.18282e+06	439178	KN-4-2	1	ANSTO	6183000	439000
STR2018_PAL	PAL	Struck	2018	10.5194/esurf-6-329-2018	605740	17035.4	SRM KN-5-2	1	ANSTO	606000	17000	3.14949e+06	150903	KN-4-2	1	ANSTO	3149000	151000
STR2018_PEA1	PEA1	Struck	2018	10.5194/esurf-6-329-2018	3.10526e+06	72105.4	SRM KN-5-2	1	ANSTO	3105000	72000	1.12922e+07	723854	KN-4-2	1	ANSTO	11292000	724000
STR2018_PEA2	PEA2	Struck	2018	10.5194/esurf-6-329-2018	4.17242e+06	105278	SRM KN-5-2	1	ANSTO	4172000	105000	1.58855e+07	958450	KN-4-2	1	ANSTO	15885000	958000
STR2018_PEA4	PEA4	Struck	2018	10.5194/esurf-6-329-2018	4.24955e+06	97510.3	SRM KN-5-2	1	ANSTO	4250000	98000	1.44715e+07	778503	KN-4-2	1	ANSTO	14471000	779000
STR2018_PEA5	PEA5	Struck	2018	10.5194/esurf-6-329-2018	3.26066e+06	77235.1	SRM KN-5-2	1	ANSTO	3261000	77000	1.1006e+07	772111	KN-4-2	1	ANSTO	11006000	772000
STR2018_PEA6	PEA6	Struck	2018	10.5194/esurf-6-329-2018	3.1336e+06	71230.8	SRM KN-5-2	1	ANSTO	3134000	71000	1.02865e+07	643356	KN-4-2	1	ANSTO	10287000	643000
STR2018_PEA7	PEA7	Struck	2018	10.5194/esurf-6-329-2018	1.5226e+06	37123	SRM KN-5-2	1	ANSTO	1523000	37000	5.66191e+06	326970	KN-4-2	1	ANSTO	5662000	327000
STR2018_PEA8	PEA8	Struck	2018	10.5194/esurf-6-329-2018	798801	20277.2	SRM KN-5-2	1	ANSTO	799000	20000	3.67109e+06	179432	KN-4-2	1	ANSTO	3671000	179000
STR2018_PIO	PIO	Struck	2018	10.5194/esurf-6-329-2018	495437	15151.2	SRM KN-5-2	1	ANSTO	495000	15000	2.78575e+06	139733	KN-4-2	1	ANSTO	2786000	140000
VAN2003_AK124A	AK124A	Vance	2003	10.1016/S0012-821X(02)01102-0	19600	2200	S555	0.9124	ETH-Zurich	17883	2007.28	151000	49000	ZAL94	0.9134	ETH-Zurich	137923	44756.6
VAN2003_AK126	AK126	Vance	2003	10.1016/S0012-821X(02)01102-0	11400	1500	S555	0.9124	ETH-Zurich	10401.4	1368.6	143000	28000	ZAL94	0.9134	ETH-Zurich	130616	25575.2
VAN2003_AK43	AK43	Vance	2003	10.1016/S0012-821X(02)01102-0	19100	2000	S555	0.9124	ETH-Zurich	17426.8	1824.8	96600	16000	ZAL94	0.9134	ETH-Zurich	88234.4	14614.4
VAN2003_AK82	AK82	Vance	2003	10.1016/S0012-821X(02)01102-0	11400	1300	S555	0.9124	ETH-Zurich	10401.4	1186.12	76900	11400	ZAL94	0.9134	ETH-Zurich	70240.5	10412.8
VAN2003_AK95	AK95	Vance	2003	10.1016/S0012-821X(02)01102-0	26100	2700	S555	0.9124	ETH-Zurich	23813.6	2463.48	183000	30000	ZAL94	0.9134	ETH-Zurich	167152	27402
VAN2022_TG-1	TG-1	VanLandingham	2022	10.5194/gchron-4-153-2022	364000	6520	07KNSTD3110	1	LLNL-CAMS	364000	6520	2.30094e+06	100667	KNSTD	1	PRIME	2.30094e+06	100667
VAN2022_TG-3	TG-3	VanLandingham	2022	10.5194/gchron-4-153-2022	397494	11660	07KNSTD3110	1	LLNL-CAMS	397494	11660	2.40513e+06	61657.4	KNSTD	1	PRIME	2.40513e+06	61657.4
VAN2022_TG-9	TG-9	VanLandingham	2022	10.5194/gchron-4-153-2022	411000	9920	07KNSTD3110	1	LLNL-CAMS	411000	9920	2.40314e+06	96982.3	KNSTD	1	PRIME	2.40314e+06	96982.3
WAL2012_Wal-B	Wal-B	Walcek	2012	10.1016/j.geomorph.2012.02.021	1420000	56900	07KNSTD	1	PRIME	1420000	56900	8.28e+06	490000	KNSTD	1	PRIME	8.28e+06	490000
WAL2012_Wal-D	Wal-D	Walcek	2012	10.1016/j.geomorph.2012.02.021	2400000	73900	07KNSTD	1	PRIME	2400000	73900	17600000	1560000	KNSTD	1	PRIME	17600000	1560000
WAL2012_Wal-E	Wal-E	Walcek	2012	10.1016/j.geomorph.2012.02.021	3050000	161000	07KNSTD	1	PRIME	3050000	161000	21100000	2230000	KNSTD	1	PRIME	21100000	2230000
WAL2012_Wal-G	Wal-G	Walcek	2012	10.1016/j.geomorph.2012.02.021	159000	9040	07KNSTD	1	PRIME	159000	9040	1140000	1190000	KNSTD	1	PRIME	1140000	1190000
WAL2012_Wal-M	Wal-M	Walcek	2012	10.1016/j.geomorph.2012.02.021	198000	20500	07KNSTD	1	PRIME	198000	20500	1250000	343000	KNSTD	1	PRIME	1250000	343000
WAL2012_Wal-N	Wal-N	Walcek	2012	10.1016/j.geomorph.2012.02.021	108000	7440	07KNSTD	1	PRIME	108000	7440	804000	289000	KNSTD	1	PRIME	804000	289000
WAN2017_Wang15	Wang15	Wang	2017	10.1016/j.epsl.2017.05.030	125600	7700	07KNSTD	1	LLNL-CAMS	125600	7700	683000	66000	KNSTD	1	LLNL-CAMS	683000	66000
WAN2017_Wang8	Wang8	Wang	2017	10.1016/j.epsl.2017.05.030	47700	3900	07KNSTD	1	LLNL-CAMS	47700	3900	330000	40000	KNSTD	1	LLNL-CAMS	330000	40000
WIT2011_Ama-b	Ama-b	Wittmann	2011	10.1016/j.jsames.2010.09.004	83161.6	3970.91	S555	0.9124	ETH-Zurich	75876.7	3623.06	346000	102700	ZAL94	0.9134	ETH-Zurich	316036	93806.2
WIT2011_Br-1a	Br-1a	Wittmann	2011	10.1016/j.jsames.2010.09.004	350961	15572.3	S555	0.9124	ETH-Zurich	320217	14208.2	2160300	151500	ZAL94	0.9134	ETH-Zurich	1.97322e+06	138380
WIT2011_Br-4c	Br-4c	Wittmann	2011	10.1016/j.jsames.2010.09.004	319868	15476.1	S555	0.9124	ETH-Zurich	291848	14120.4	1.8564e+06	167400	ZAL94	0.9134	ETH-Zurich	1.69564e+06	152903
WIT2011_Br-5b	Br-5b	Wittmann	2011	10.1016/j.jsames.2010.09.004	469067	39451.9	S555	0.9124	ETH-Zurich	427977	35995.9	1832600	171600	ZAL94	0.9134	ETH-Zurich	1.6739e+06	156739
WIT2011_Br-5c	Br-5c	Wittmann	2011	10.1016/j.jsames.2010.09.004	338695	22157.2	S555	0.9124	ETH-Zurich	309026	20216.3	1897800	120100	ZAL94	0.9134	ETH-Zurich	1.73345e+06	109699
WIT2011_Br-8b-2	Br-8b-2	Wittmann	2011	10.1016/j.jsames.2010.09.004	321950	21013.6	S555	0.9124	ETH-Zurich	293747	19172.8	1696200	121400	ZAL94	0.9134	ETH-Zurich	1.54931e+06	110887
WIT2011_Cb-10b-2	Cb-10b-2	Wittmann	2011	10.1016/j.jsames.2010.09.004	122253	8958.22	S555	0.9124	ETH-Zurich	111544	8173.48	731400	90400	ZAL94	0.9134	ETH-Zurich	668061	82571.4
WIT2011_Cb-2a	Cb-2a	Wittmann	2011	10.1016/j.jsames.2010.09.004	161601	8710.38	S555	0.9124	ETH-Zurich	147445	7947.35	1018800	69400	ZAL94	0.9134	ETH-Zurich	930572	63390
WIT2011_Cb-3a-2	Cb-3a-2	Wittmann	2011	10.1016/j.jsames.2010.09.004	377872	39685.5	S555	0.9124	ETH-Zurich	344770	36209	1847100	143900	ZAL94	0.9134	ETH-Zurich	1.68714e+06	131438
WIT2011_Cb-4a-1	Cb-4a-1	Wittmann	2011	10.1016/j.jsames.2010.09.004	117504	10706.6	S555	0.9124	ETH-Zurich	107211	9768.68	784400	76100	ZAL94	0.9134	ETH-Zurich	716471	69509.7
WIT2011_Cb-6b-3	Cb-6b-3	Wittmann	2011	10.1016/j.jsames.2010.09.004	174952	9516.5	S555	0.9124	ETH-Zurich	159626	8682.85	992700	86600	ZAL94	0.9134	ETH-Zurich	906732	79100.4
WIT2011_Cb-7b-2	Cb-7b-2	Wittmann	2011	10.1016/j.jsames.2010.09.004	329035	40395.3	S555	0.9124	ETH-Zurich	300212	36856.7	1647000	146400	ZAL94	0.9134	ETH-Zurich	1.50437e+06	133722
WIT2011_Cb-8b-2	Cb-8b-2	Wittmann	2011	10.1016/j.jsames.2010.09.004	224536	9577.39	S555	0.9124	ETH-Zurich	204866	8738.41	1147500	62700	ZAL94	0.9134	ETH-Zurich	1.04813e+06	57270.2
WIT2011_Ir-04b	Ir-04b	Wittmann	2011	10.1016/j.jsames.2010.09.004	87683.9	5639.59	S555	0.9124	ETH-Zurich	80002.8	5145.57	493600	161800	ZAL94	0.9134	ETH-Zurich	450854	147788
WIT2011_Ir-04c	Ir-04c	Wittmann	2011	10.1016/j.jsames.2010.09.004	133119	4690.19	S555	0.9124	ETH-Zurich	121457	4279.33	928600	82600	ZAL94	0.9134	ETH-Zurich	848183	75446.8
WIT2011_Ir-10b	Ir-10b	Wittmann	2011	10.1016/j.jsames.2010.09.004	89414.3	4569.53	S555	0.9124	ETH-Zurich	81581.6	4169.24	471200	82600	ZAL94	0.9134	ETH-Zurich	430394	75446.8
WIT2011_Ir-10c	Ir-10c	Wittmann	2011	10.1016/j.jsames.2010.09.004	144359	7203.17	S555	0.9124	ETH-Zurich	131713	6572.18	645600	49200	ZAL94	0.9134	ETH-Zurich	589691	44939.3
WIT2011_Ir-15b	Ir-15b	Wittmann	2011	10.1016/j.jsames.2010.09.004	100985	4358.62	S555	0.9124	ETH-Zurich	92139.1	3976.81	383400	80800	ZAL94	0.9134	ETH-Zurich	350198	73802.7
WIT2011_Ir-15c	Ir-15c	Wittmann	2011	10.1016/j.jsames.2010.09.004	155045	5684.22	S555	0.9124	ETH-Zurich	141463	5186.28	723600	59800	ZAL94	0.9134	ETH-Zurich	660936	54621.3
WIT2011_Mad-11c	Mad-11c	Wittmann	2011	10.1016/j.jsames.2010.09.004	218043	9719.34	S555	0.9124	ETH-Zurich	198942	8867.93	1043700	103600	ZAL94	0.9134	ETH-Zurich	953316	94628.2
WIT2011_Mad-18b	Mad-18b	Wittmann	2011	10.1016/j.jsames.2010.09.004	65642.4	3750.43	S555	0.9124	ETH-Zurich	59892.1	3421.89	436500	163100	ZAL94	0.9134	ETH-Zurich	398699	148976
WIT2011_Man-02a	Man-02a	Wittmann	2011	10.1016/j.jsames.2010.09.004	63681.2	3993.94	S555	0.9124	ETH-Zurich	58102.7	3644.07	539400	205800	ZAL94	0.9134	ETH-Zurich	492688	187978
WIT2011_Man-11b	Man-11b	Wittmann	2011	10.1016/j.jsames.2010.09.004	75995.5	3326.73	S555	0.9124	ETH-Zurich	69338.3	3035.31	328100	87400	ZAL94	0.9134	ETH-Zurich	299687	79831.2
WIT2011_Man-11c-2	Man-11c-2	Wittmann	2011	10.1016/j.jsames.2010.09.004	80124.2	6948.21	S555	0.9124	ETH-Zurich	73105.3	6339.54	480900	46600	ZAL94	0.9134	ETH-Zurich	439254	42564.4
WIT2011_Man-24a	Man-24a	Wittmann	2011	10.1016/j.jsames.2010.09.004	61463.3	6965.73	S555	0.9124	ETH-Zurich	56079.1	6355.54	333800	41100	ZAL94	0.9134	ETH-Zurich	304893	37540.7
WIT2011_Ne-Lb-a	Ne-Lb-a	Wittmann	2011	10.1016/j.jsames.2010.09.004	80545.3	6503.77	S555	0.9124	ETH-Zurich	73489.5	5934.04	325500	25600	ZAL94	0.9134	ETH-Zurich	297312	23383
WIT2011_Ne-Lb-b	Ne-Lb-b	Wittmann	2011	10.1016/j.jsames.2010.09.004	74542.9	3865.34	S555	0.9124	ETH-Zurich	68012.9	3526.73	321000	25900	ZAL94	0.9134	ETH-Zurich	293201	23657.1
WIT2011_Ne-Rb-a	Ne-Rb-a	Wittmann	2011	10.1016/j.jsames.2010.09.004	102774	4664.25	S555	0.9124	ETH-Zurich	93770.9	4255.67	476600	33500	ZAL94	0.9134	ETH-Zurich	435326	30598.9
WIT2011_Ne-Rb-b	Ne-Rb-b	Wittmann	2011	10.1016/j.jsames.2010.09.004	91404.6	5661.47	S555	0.9124	ETH-Zurich	83397.6	5165.52	475400	32100	ZAL94	0.9134	ETH-Zurich	434230	29320.1
WIT2011_Par-09a	Par-09a	Wittmann	2011	10.1016/j.jsames.2010.09.004	61986.8	3623.45	S555	0.9124	ETH-Zurich	56556.8	3306.03	364900	41400	ZAL94	0.9134	ETH-Zurich	333300	37814.8
WIT2011_Par-22b	Par-22b	Wittmann	2011	10.1016/j.jsames.2010.09.004	68262.7	6198.33	S555	0.9124	ETH-Zurich	62282.9	5655.35	440500	207300	ZAL94	0.9134	ETH-Zurich	402353	189348
WIT2011_Pe-101a-2	Pe-101a-2	Wittmann	2011	10.1016/j.jsames.2010.09.004	80372.7	8453.61	S555	0.9124	ETH-Zurich	73332	7713.07	492900	58500	ZAL94	0.9134	ETH-Zurich	450215	53433.9
WIT2011_Pe-107a-2	Pe-107a-2	Wittmann	2011	10.1016/j.jsames.2010.09.004	50301.1	3910.27	S555	0.9124	ETH-Zurich	45894.7	3567.73	343100	74800	ZAL94	0.9134	ETH-Zurich	313388	68322.3
WIT2011_Tapa-b-2	Tapa-b-2	Wittmann	2011	10.1016/j.jsames.2010.09.004	105443	6452.68	S555	0.9124	ETH-Zurich	96205.9	5887.43	712200	44800	ZAL94	0.9134	ETH-Zurich	650523	40920.3
WIT2011_Tapa-c	Tapa-c	Wittmann	2011	10.1016/j.jsames.2010.09.004	88519.6	5577.61	S555	0.9124	ETH-Zurich	80765.3	5089.01	505600	41600	ZAL94	0.9134	ETH-Zurich	461815	37997.4
WIT2016_D1	D1	Wittmann	2016	10.1016/j.epsl.2016.07.017	26400	1700	07KNSTD	1	Cologne	26400	1700	236000	65000	KN01-X-Y	1	Cologne	236000	65000
WIT2016_D2	D2	Wittmann	2016	10.1016/j.epsl.2016.07.017	21900	1200	07KNSTD	1	Cologne	21900	1200	131900	6400	KN01-X-Y	1	Cologne	131900	6400
WIT2016_D3	D3	Wittmann	2016	10.1016/j.epsl.2016.07.017	22600	1400	07KNSTD	1	Cologne	22600	1400	132000	32000	KN01-X-Y	1	Cologne	132000	32000
WIT2016_P1	P1	Wittmann	2016	10.1016/j.epsl.2016.07.017	33000	1600	07KNSTD	1	Cologne	33000	1600	202000	21000	KN01-X-Y	1	Cologne	202000	21000
WIT2016_P2	P2	Wittmann	2016	10.1016/j.epsl.2016.07.017	32100	1400	07KNSTD	1	Cologne	32100	1400	203000	29000	KN01-X-Y	1	Cologne	203000	29000
WIT2016_P3-1	P3-1	Wittmann	2016	10.1016/j.epsl.2016.07.017	36600	1900	07KNSTD	1	Cologne	36600	1900	236000	27000	KN01-X-Y	1	Cologne	236000	27000
WIT2016_P6-2	P6-2	Wittmann	2016	10.1016/j.epsl.2016.07.017	29800	2500	07KNSTD	1	Cologne	29800	2500	174000	21000	KN01-X-Y	1	Cologne	174000	21000
WIT2016_T15	T15	Wittmann	2016	10.1016/j.epsl.2016.07.017	13400	1500	07KNSTD	1	Cologne	13400	1500	90000	11000	KN01-X-Y	1	Cologne	90000	11000
WIT2016_T16	T16	Wittmann	2016	10.1016/j.epsl.2016.07.017	62300	2800	07KNSTD	1	Cologne	62300	2800	356000	24000	KN01-X-Y	1	Cologne	356000	24000
WIT2016_T17	T17	Wittmann	2016	10.1016/j.epsl.2016.07.017	56400	2500	07KNSTD	1	Cologne	56400	2500	343000	34000	KN01-X-Y	1	Cologne	343000	34000
WIT2016_T18	T18	Wittmann	2016	10.1016/j.epsl.2016.07.017	31000	1400	07KNSTD	1	Cologne	31000	1400	186000	34000	KN01-X-Y	1	Cologne	186000	34000
WIT2016_T23	T23	Wittmann	2016	10.1016/j.epsl.2016.07.017	11200	2400	07KNSTD	1	Cologne	11200	2400	185000	44000	KN01-X-Y	1	Cologne	185000	44000
WIT2016_T24	T24	Wittmann	2016	10.1016/j.epsl.2016.07.017	9200	2800	07KNSTD	1	Cologne	9200	2800	91000	17000	KN01-X-Y	1	Cologne	91000	17000
WIT2020_1	1	Wittmann	2020	10.1016/j.earscirev.2020.103147	41500	2000	07KNSTD	1	Cologne	41500	2000	268000	33000	KNSTD	1	Cologne	268000	33000
WIT2020_10	10	Wittmann	2020	10.1016/j.earscirev.2020.103147	312000	11000	07KNSTD	1	Cologne	312000	11000	2020000	109000	KNSTD	1	Cologne	2020000	109000
WIT2020_11	11	Wittmann	2020	10.1016/j.earscirev.2020.103147	43900	2200	07KNSTD	1	Cologne	43900	2200	223000	23000	KNSTD	1	Cologne	223000	23000
WIT2020_12	12	Wittmann	2020	10.1016/j.earscirev.2020.103147	81400	3200	07KNSTD	1	Cologne	81400	3200	735000	179000	KNSTD	1	Cologne	735000	179000
WIT2020_13	13	Wittmann	2020	10.1016/j.earscirev.2020.103147	62200	2500	07KNSTD	1	Cologne	62200	2500	383000	37000	KNSTD	1	Cologne	383000	37000
WIT2020_15	15	Wittmann	2020	10.1016/j.earscirev.2020.103147	108000	4000	07KNSTD	1	Cologne	108000	4000	691000	29000	KNSTD	1	Cologne	691000	29000
WIT2020_16	16	Wittmann	2020	10.1016/j.earscirev.2020.103147	57600	2400	07KNSTD	1	Cologne	57600	2400	523000	52000	KNSTD	1	Cologne	523000	52000
WIT2020_18	18	Wittmann	2020	10.1016/j.earscirev.2020.103147	71600	2500	07KNSTD	1	Cologne	71600	2500	528000	65000	KNSTD	1	Cologne	528000	65000
WIT2020_19	19	Wittmann	2020	10.1016/j.earscirev.2020.103147	35800	2500	07KNSTD	1	Cologne	35800	2500	254000	24000	KNSTD	1	Cologne	254000	24000
WIT2020_2	2	Wittmann	2020	10.1016/j.earscirev.2020.103147	45200	2900	07KNSTD	1	Cologne	45200	2900	245000	34000	KNSTD	1	Cologne	245000	34000
WIT2020_20	20	Wittmann	2020	10.1016/j.earscirev.2020.103147	12300	900	07KNSTD	1	Cologne	12300	900	116000	13000	KNSTD	1	Cologne	116000	13000
WIT2020_21	21	Wittmann	2020	10.1016/j.earscirev.2020.103147	39900	3600	07KNSTD	1	Cologne	39900	3600	266000	24000	KNSTD	1	Cologne	266000	24000
WIT2020_22	22	Wittmann	2020	10.1016/j.earscirev.2020.103147	163000	6500	07KNSTD	1	Cologne	163000	6500	900000	60000	KNSTD	1	Cologne	900000	60000
WIT2020_23	23	Wittmann	2020	10.1016/j.earscirev.2020.103147	66900	2700	07KNSTD	1	Cologne	66900	2700	148000	11000	KNSTD	1	Cologne	148000	11000
WIT2020_24	24	Wittmann	2020	10.1016/j.earscirev.2020.103147	65600	2600	07KNSTD	1	Cologne	65600	2600	338000	53000	KNSTD	1	Cologne	338000	53000
WIT2020_26	26	Wittmann	2020	10.1016/j.earscirev.2020.103147	39900	1900	07KNSTD	1	Cologne	39900	1900	205000	27000	KNSTD	1	Cologne	205000	27000
WIT2020_28	28	Wittmann	2020	10.1016/j.earscirev.2020.103147	248000	7800	07KNSTD	1	Cologne	248000	7800	1012000	43000	KNSTD	1	Cologne	1012000	43000
WIT2020_29	29	Wittmann	2020	10.1016/j.earscirev.2020.103147	43400	1500	07KNSTD	1	Cologne	43400	1500	68000	5000	KNSTD	1	Cologne	68000	5000
WIT2020_3	3	Wittmann	2020	10.1016/j.earscirev.2020.103147	35000	1700	07KNSTD	1	Cologne	35000	1700	201000	28000	KNSTD	1	Cologne	201000	28000
WIT2020_32	32	Wittmann	2020	10.1016/j.earscirev.2020.103147	11100	500	07KNSTD	1	Cologne	11100	500	76000	10000	KNSTD	1	Cologne	76000	10000
WIT2020_33	33	Wittmann	2020	10.1016/j.earscirev.2020.103147	32800	2500	07KNSTD	1	Cologne	32800	2500	282000	69000	KNSTD	1	Cologne	282000	69000
WIT2020_34	34	Wittmann	2020	10.1016/j.earscirev.2020.103147	16800	1200	07KNSTD	1	Cologne	16800	1200	52000	9000	KNSTD	1	Cologne	52000	9000
WIT2020_35	35	Wittmann	2020	10.1016/j.earscirev.2020.103147	24700	1800	07KNSTD	1	Cologne	24700	1800	180000	31000	KNSTD	1	Cologne	180000	31000
WIT2020_36	36	Wittmann	2020	10.1016/j.earscirev.2020.103147	120000	4500	07KNSTD	1	Cologne	120000	4500	949000	115000	KNSTD	1	Cologne	949000	115000
WIT2020_37	37	Wittmann	2020	10.1016/j.earscirev.2020.103147	48100	2300	07KNSTD	1	Cologne	48100	2300	399000	57000	KNSTD	1	Cologne	399000	57000
WIT2020_38	38	Wittmann	2020	10.1016/j.earscirev.2020.103147	79400	3600	07KNSTD	1	Cologne	79400	3600	525000	87000	KNSTD	1	Cologne	525000	87000
WIT2020_39	39	Wittmann	2020	10.1016/j.earscirev.2020.103147	150000	2300	07KNSTD	1	Cologne	150000	2300	1060000	90000	KNSTD	1	Cologne	1060000	90000
WIT2020_4	4	Wittmann	2020	10.1016/j.earscirev.2020.103147	33900	1600	07KNSTD	1	Cologne	33900	1600	205000	29000	KNSTD	1	Cologne	205000	29000
WIT2020_41	41	Wittmann	2020	10.1016/j.earscirev.2020.103147	133000	41100	07KNSTD	1	Cologne	133000	41100	1024000	41000	KNSTD	1	Cologne	1024000	41000
WIT2020_42	42	Wittmann	2020	10.1016/j.earscirev.2020.103147	384000	4300	07KNSTD	1	Cologne	384000	4300	3020000	165000	KNSTD	1	Cologne	3020000	165000
WIT2020_44	44	Wittmann	2020	10.1016/j.earscirev.2020.103147	184000	31400	07KNSTD	1	Cologne	184000	31400	1010000	123000	KNSTD	1	Cologne	1010000	123000
WIT2020_45	45	Wittmann	2020	10.1016/j.earscirev.2020.103147	106000	3700	07KNSTD	1	Cologne	106000	3700	490000	12000	KNSTD	1	Cologne	490000	12000
WIT2020_46	46	Wittmann	2020	10.1016/j.earscirev.2020.103147	46500	1700	07KNSTD	1	Cologne	46500	1700	311000	63000	KNSTD	1	Cologne	311000	63000
WIT2020_47	47	Wittmann	2020	10.1016/j.earscirev.2020.103147	461000	15200	07KNSTD	1	Cologne	461000	15200	2900000	37000	KNSTD	1	Cologne	2900000	37000
WIT2020_48	48	Wittmann	2020	10.1016/j.earscirev.2020.103147	519000	16400	07KNSTD	1	Cologne	519000	16400	2340000	74000	KNSTD	1	Cologne	2340000	74000
WIT2020_49	49	Wittmann	2020	10.1016/j.earscirev.2020.103147	110000	3900	07KNSTD	1	Cologne	110000	3900	510000	35000	KNSTD	1	Cologne	510000	35000
WIT2020_5	5	Wittmann	2020	10.1016/j.earscirev.2020.103147	36200	1900	07KNSTD	1	Cologne	36200	1900	186000	33000	KNSTD	1	Cologne	186000	33000
WIT2020_50	50	Wittmann	2020	10.1016/j.earscirev.2020.103147	231000	7800	07KNSTD	1	Cologne	231000	7800	1150000	72000	KNSTD	1	Cologne	1150000	72000
WIT2020_51	51	Wittmann	2020	10.1016/j.earscirev.2020.103147	338000	10900	07KNSTD	1	Cologne	338000	10900	2127000	154000	KNSTD	1	Cologne	2127000	154000
WIT2020_53	53	Wittmann	2020	10.1016/j.earscirev.2020.103147	1130000	35500	07KNSTD	1	Cologne	1130000	35500	5440000	206000	KNSTD	1	Cologne	5440000	206000
WIT2020_55	55	Wittmann	2020	10.1016/j.earscirev.2020.103147	163800	7700	07KNSTD	1	Cologne	163800	7700	1457000	72000	KNSTD	1	Cologne	1457000	72000
WIT2020_56	56	Wittmann	2020	10.1016/j.earscirev.2020.103147	226000	7400	07KNSTD	1	Cologne	226000	7400	1390000	121000	KNSTD	1	Cologne	1390000	121000
WIT2020_57	57	Wittmann	2020	10.1016/j.earscirev.2020.103147	327000	10500	07KNSTD	1	Cologne	327000	10500	1610000	93000	KNSTD	1	Cologne	1610000	93000
WIT2020_58	58	Wittmann	2020	10.1016/j.earscirev.2020.103147	779300	26200	07KNSTD	1	Cologne	779300	26200	5000000	251000	KNSTD	1	Cologne	5000000	251000
WIT2020_59	59	Wittmann	2020	10.1016/j.earscirev.2020.103147	621700	19500	07KNSTD	1	Cologne	621700	19500	2950000	169000	KNSTD	1	Cologne	2950000	169000
WIT2020_6	6	Wittmann	2020	10.1016/j.earscirev.2020.103147	33900	1500	07KNSTD	1	Cologne	33900	1500	170000	18000	KNSTD	1	Cologne	170000	18000
WIT2020_7	7	Wittmann	2020	10.1016/j.earscirev.2020.103147	116000	1300	07KNSTD	1	Cologne	116000	1300	859000	71000	KNSTD	1	Cologne	859000	71000
WIT2020_8	8	Wittmann	2020	10.1016/j.earscirev.2020.103147	89800	9300	07KNSTD	1	Cologne	89800	9300	625000	78000	KNSTD	1	Cologne	625000	78000
WIT2020_9	9	Wittmann	2020	10.1016/j.earscirev.2020.103147	168000	6400	07KNSTD	1	Cologne	168000	6400	928000	142000	KNSTD	1	Cologne	928000	142000
YAN2021_DSC-RB	DSC-RB	Yang	2021	10.1007/s11430-020-9744-6	203900	6200	NIST_27900	1	SUERC	203900	6200	1363000	49000	Z92-0222	1	SUERC	1363000	49000
YAN2021_MDC-RB	MDC-RB	Yang	2021	10.1007/s11430-020-9744-6	200800	6500	NIST_27900	1	SUERC	200800	6500	1341000	48000	Z92-0222	1	SUERC	1341000	48000
YAN2021_SXC-RB	SXC-RB	Yang	2021	10.1007/s11430-020-9744-6	101300	3500	NIST_27900	1	SUERC	101300	3500	603000	24000	Z92-0222	1	SUERC	603000	24000
YAN2021_YTGC-RB	YTGC-RB	Yang	2021	10.1007/s11430-020-9744-6	88300	3400	NIST_27900	1	SUERC	88300	3400	503000	21000	Z92-0222	1	SUERC	503000	21000
ZHA2021_M1	M1	Zhang	2021	10.1002/esp.5105	293300	10400	NIST_27900	1	Tianjin University	293300	10400	1975200	50400	Al01-4-1	1	Tianjin University	1975200	50400
ZHA2021_M10	M10	Zhang	2021	10.1002/esp.5105	503200	14500	NIST_27900	1	Tianjin University	503200	14500	3760100	117200	Al01-4-1	1	Tianjin University	3760100	117200
ZHA2021_M2	M2	Zhang	2021	10.1002/esp.5105	210800	7100	NIST_27900	1	Tianjin University	210800	7100	1467500	41800	Al01-4-1	1	Tianjin University	1467500	41800
ZHA2021_M3	M3	Zhang	2021	10.1002/esp.5105	49900	6600	NIST_27900	1	Tianjin University	49900	6600	271200	16700	Al01-4-1	1	Tianjin University	271200	16700
ZHA2021_M3*	M3*	Zhang	2021	10.1002/esp.5105	51000	8700	NIST_27900	1	Tianjin University	51000	8700	364300	24700	Al01-4-1	1	Tianjin University	364300	24700
ZHA2021_M4	M4	Zhang	2021	10.1002/esp.5105	20600	4900	NIST_27900	1	Tianjin University	20600	4900	78100	7200	Al01-4-1	1	Tianjin University	78100	7200
ZHA2021_M5	M5	Zhang	2021	10.1002/esp.5105	69200	7600	NIST_27900	1	Tianjin University	69200	7600	115000	17300	Al01-4-1	1	Tianjin University	115000	17300
ZHA2021_M6	M6	Zhang	2021	10.1002/esp.5105	19600	4600	NIST_27900	1	Tianjin University	19600	4600	73600	6700	Al01-4-1	1	Tianjin University	73600	6700
ZHA2021_M7	M7	Zhang	2021	10.1002/esp.5105	62800	4600	NIST_27900	1	Tianjin University	62800	4600	387000	15000	Al01-4-1	1	Tianjin University	387000	15000
ZHA2021_M8	M8	Zhang	2021	10.1002/esp.5105	148500	17100	NIST_27900	1	Tianjin University	148500	17100	203700	27300	Al01-4-1	1	Tianjin University	203700	27300
ZHA2021_M9	M9	Zhang	2021	10.1002/esp.5105	302700	17500	NIST_27900	1	Tianjin University	302700	17500	2099800	50800	Al01-4-1	1	Tianjin University	2099800	50800
ZHA2021_T10	T10	Zhang	2021	10.1002/esp.5105	49700	2300	NIST_27900	1	Tianjin University	49700	2300	333200	16900	Al01-4-1	1	Tianjin University	333200	16900
ZHA2021_T11	T11	Zhang	2021	10.1002/esp.5105	199800	6800	NIST_27900	1	Tianjin University	199800	6800	1442400	42800	Al01-4-1	1	Tianjin University	1442400	42800
ZHA2021_T2	T2	Zhang	2021	10.1002/esp.5105	238400	8000	NIST_27900	1	Tianjin University	238400	8000	1838300	53000	Al01-4-1	1	Tianjin University	1838300	53000
ZHA2021_T3	T3	Zhang	2021	10.1002/esp.5105	38300	2700	NIST_27900	1	Tianjin University	38300	2700	215200	15100	Al01-4-1	1	Tianjin University	215200	15100
ZHA2021_T4	T4	Zhang	2021	10.1002/esp.5105	17200	1600	NIST_27900	1	Tianjin University	17200	1600	113000	11900	Al01-4-1	1	Tianjin University	113000	11900
ZHA2021_T5	T5	Zhang	2021	10.1002/esp.5105	36900	2100	NIST_27900	1	Tianjin University	36900	2100	243700	10400	Al01-4-1	1	Tianjin University	243700	10400
ZHA2021_T6	T6	Zhang	2021	10.1002/esp.5105	23300	1900	NIST_27900	1	Tianjin University	23300	1900	175600	10300	Al01-4-1	1	Tianjin University	175600	10300
ZHA2021_T7	T7	Zhang	2021	10.1002/esp.5105	33200	2200	NIST_27900	1	Tianjin University	33200	2200	236500	12500	Al01-4-1	1	Tianjin University	236500	12500
ZHA2021_T8	T8	Zhang	2021	10.1002/esp.5105	52900	4500	NIST_27900	1	Tianjin University	52900	4500	265100	15600	Al01-4-1	1	Tianjin University	265100	15600
ZHA2021_T9	T9	Zhang	2021	10.1002/esp.5105	48000	5500	NIST_27900	1	Tianjin University	48000	5500	273000	14200	Al01-4-1	1	Tianjin University	273000	14200
ZHA2022_M1	M1	Zhang	2022	10.1007/s11442-022-1950-4	1501000	49000	NIST_27900	1	Tianjin University	1501000	49000	10560000	310000	Al01-4-1	1	Tianjin University	10560000	310000
ZHA2022_M2	M2	Zhang	2022	10.1007/s11442-022-1950-4	1327000	39000	NIST_27900	1	Tianjin University	1327000	39000	8970000	240000	Al01-4-1	1	Tianjin University	8970000	240000
ZHA2022_M3	M3	Zhang	2022	10.1007/s11442-022-1950-4	653000	22000	NIST_27900	1	Tianjin University	653000	22000	4400000	130000	Al01-4-1	1	Tianjin University	4400000	130000
ZHA2022_T1	T1	Zhang	2022	10.1007/s11442-022-1950-4	2260000	75000	NIST_27900	1	Tianjin University	2260000	75000	20260000	500000	Al01-4-1	1	Tianjin University	20260000	500000
ZHA2022_T10	T10	Zhang	2022	10.1007/s11442-022-1950-4	228000	7000	NIST_27900	1	Tianjin University	228000	7000	1440000	50000	Al01-4-1	1	Tianjin University	1440000	50000
ZHA2022_T11	T11	Zhang	2022	10.1007/s11442-022-1950-4	352000	12000	NIST_27900	1	Tianjin University	352000	12000	2700000	80000	Al01-4-1	1	Tianjin University	2700000	80000
ZHA2022_T12	T12	Zhang	2022	10.1007/s11442-022-1950-4	983000	32000	NIST_27900	1	Tianjin University	983000	32000	6860000	170000	Al01-4-1	1	Tianjin University	6860000	170000
ZHA2022_T2	T2	Zhang	2022	10.1007/s11442-022-1950-4	1495000	44000	NIST_27900	1	Tianjin University	1495000	44000	9850000	180000	Al01-4-1	1	Tianjin University	9850000	180000
ZHA2022_T3	T3	Zhang	2022	10.1007/s11442-022-1950-4	1081000	33000	NIST_27900	1	Tianjin University	1081000	33000	7280000	190000	Al01-4-1	1	Tianjin University	7280000	190000
ZHA2022_T4	T4	Zhang	2022	10.1007/s11442-022-1950-4	1042000	32000	NIST_27900	1	Tianjin University	1042000	32000	7220000	190000	Al01-4-1	1	Tianjin University	7220000	190000
ZHA2022_T5	T5	Zhang	2022	10.1007/s11442-022-1950-4	1077000	32000	NIST_27900	1	Tianjin University	1077000	32000	6890000	190000	Al01-4-1	1	Tianjin University	6890000	190000
ZHA2022_T6	T6	Zhang	2022	10.1007/s11442-022-1950-4	1155000	31000	NIST_27900	1	Tianjin University	1155000	31000	7740000	170000	Al01-4-1	1	Tianjin University	7740000	170000
ZHA2022_T7	T7	Zhang	2022	10.1007/s11442-022-1950-4	497000	15000	NIST_27900	1	Tianjin University	497000	15000	3620000	110000	Al01-4-1	1	Tianjin University	3620000	110000
ZHA2022_T9	T9	Zhang	2022	10.1007/s11442-022-1950-4	274000	9000	NIST_27900	1	Tianjin University	274000	9000	2000000	60000	Al01-4-1	1	Tianjin University	2000000	60000
PLA2010_ADBA-12SDsm	ADBA-12SDsm	Placzek	2010	10.1016/j.epsl.2010.03.006	10400000	190000	07KNSTD	1	PRIME-Lab	10400000	190000	51500000	1700000	KNSTD	1	PRIME-Lab	51500000	1700000
PLA2010_ADBA-13SD	ADBA-13SD	Placzek	2010	10.1016/j.epsl.2010.03.006	20260000	460000	07KNSTD	1	PRIME-Lab	20260000	460000	105800000	5700000	KNSTD	1	PRIME-Lab	105800000	5700000
PLA2010_ADBA-2SD	ADBA-2SD	Placzek	2010	10.1016/j.epsl.2010.03.006	8840000	300000	07KNSTD	1	PRIME-Lab	8840000	300000	51800000	2000000	KNSTD	1	PRIME-Lab	51800000	2000000
PLA2010_ADBA-5SD	ADBA-5SD	Placzek	2010	10.1016/j.epsl.2010.03.006	6920000	210000	07KNSTD	1	PRIME-Lab	6920000	210000	31200000	1400000	KNSTD	1	PRIME-Lab	31200000	1400000
PLA2010_ADSA-1SD	ADSA-1SD	Placzek	2010	10.1016/j.epsl.2010.03.006	8040000	580000	07KNSTD	1	PRIME-Lab	8040000	580000	37300000	8100000	KNSTD	1	PRIME-Lab	37300000	8100000
PLA2010_ADSO-3SD	ADSO-3SD	Placzek	2010	10.1016/j.epsl.2010.03.006	6770000	610000	07KNSTD	1	PRIME-Lab	6770000	610000	18400000	5200000	KNSTD	1	PRIME-Lab	18400000	5200000
PLA2010_ADSO-6SD	ADSO-6SD	Placzek	2010	10.1016/j.epsl.2010.03.006	15380000	540000	07KNSTD	1	PRIME-Lab	15380000	540000	78000000	2800000	KNSTD	1	PRIME-Lab	78000000	2800000
PLA2010_ASOI-SD	ASOI-SD	Placzek	2010	10.1016/j.epsl.2010.03.006	6470000	260000	07KNSTD	1	PRIME-Lab	6470000	260000	33000000	2200000	KNSTD	1	PRIME-Lab	33000000	2200000
JTZ2024_br	br	Jautzy	2024	10.1016/j.epsl.2023.118490	97745	3030	07KNSTD	1	ASTER	97745	3030	740404	63846	SMAL11	1.021	ASTER	755952	65187
JTZ2024_cl	cl	Jautzy	2024	10.1016/j.epsl.2023.118490	77293	4560	07KNSTD	1	ASTER	77293	4560	110669	16232	SMAL11	1.021	ASTER	112993	16573
JTZ2024_do	do	Jautzy	2024	10.1016/j.epsl.2023.118490	60553	2438	07KNSTD	1	ASTER	60553	2438	207902	39470	SMAL11	1.021	ASTER	212268	40299
JTZ2024_fe-01	fe-01	Jautzy	2024	10.1016/j.epsl.2023.118490	104953	4008	07KNSTD	1	ASTER	104953	4008	637715	157416	SMAL11	1.021	ASTER	651107	160721
JTZ2024_fe-02	fe-02	Jautzy	2024	10.1016/j.epsl.2023.118490	110147	4792	07KNSTD	1	ASTER	110147	4792	673321	58789	SMAL11	1.021	ASTER	687461	60024
[truncated: 118 more rows]

## Sheet: CRONUS Input V3
CRONUS_Input_-_Centroid_Latitude_and_Effective_Atm._Pressure
[truncated: 767 more rows]

## Sheet: Calculated Erosion Rates
ID	Nuclide	St (m/My)	St Int	St Ext	Lm (m/My)	Lm Int	Lm Ext	LSDn (m/My)	LSDn Int	LSDn Ext	Nuclide	St (m/My)	St Int	St Ext	Lm (m/My)	Lm Int	Lm Ext	LSDn (m/My)	LSDn Int	LSDn Ext
[truncated: 766 more rows]
