# Supplementary material for: Global analysis of in situ cosmogenic 26 Al and 10 Be and inferred erosion rate ratios in modern fluvial sediments indicates widespread sediment storage and burial during transport
Source: Copernicus journal article supplement (doi:10.5194/gchron-7-213-2025), 2025-07-11
Supplement: Supplementary file 4 [file TS2_New_Al_Measurements_Jan2025.xlsx]

## Sheet: Read Me
Table S2 - Data and calculations for new in situ Al-26 measurements on archived samples at the University of Vermont
The contents of each tab are described below
26Al Calculations
All sample information and calculations to convert AMS 26/27Al ratio measurements to 26Al concentrations
Also provided are the 10Be concentration measurements and uncertainties from the Be fraction of each sample along with the source for these measurements.
	Note that all 10Be measurements reported here are normalized to the 07KNSTD standard. Details of this normalization and originally-reported values can be found in Table S2
Each sample has two UVM batches associated with it:
	Original UVM Batch - The original University of Vermont processing batch, during which Al and Be fractions were separated and only Be concentrations were measured via AMS
	Project UVM Batch - The new processing batch specific to this project in which archived Al gels were re-dissolved, put through a Mg-removal process, and sent to AMS for isotope measurement
Blanks
A full accounting of Al blanks from the original UVM processing batches.
These blanks o= were measured alongside the archived Al samples, including the average blank calculation
Journal Style Table
The key information from sample processing, AMS measurements, and 26Al calculations summarized for each sample

## Sheet: 26Al Calcs
Calculating 26Al/10Be Production Ratios
												missing blank batch, instead used project average 2.37E-15 ± 1.84E-15
CONSTANTS
Atomic Mass of Al (g/mol):		26.9815
Avogadro's Number (atoms/mol):		6.022e+23
Sample Information					Calculations for 26Al Concentrations													Uncertainty Calculations			10Be Information
Sample ID	Original UVM Batch	Project UVM Batch	Al Analysis Date	Quartz Mass (g)	From Aliquot measurements: Al mass (mg)	Al mass (g)	Uncertainty (% Diff in aliquots)	From AMS: Uncorrected 26Al/27Al (10-15)	Uncorrected 26Al/27Al	Blanks: Background 26Al/27Al	±	Background-Corrected 26Al/27Al Ratio	Assumed 27Al Mass in Blank mg (Corbett 2016)	Assumed 27Al Atoms in blank	Calculate: 27Al Atoms in sample	26Al in blank	26Al Conc. (atoms/g) blank atoms substracted	From AMS: Uncorrected 26Al/27Al Ratio Uncertainty	Uncertainty: 26Al Atoms	Concentration Uncertainty: 26Al Atoms/g	From previous studies: 10Be Conc. (atoms/g)	From previous studies: 10Be Conc. Unc (atoms/g)	26Al/10Be Concentration Ratio	10Be Measurement Source
02-117-xf	444	CH-16	2021-11-30	31.2683	4662.4	0.0046624	0.047	149.002	1.49002e-13	1.74387e-15	5.52607e-16	1.47258e-13	1.5	3.34784e+19	1.0406e+20	58382.1	494007	6.44493e-15	670659	21448.5	78500	2600	6.29308	Portenga et al., 2015, Geomorphology, DOI:10.1016/j.geomorph.2014.09.027
02-122-xf	442	CH-16	2021-11-30	40.2191	4257	0.004257	0.962	103.551	1.03551e-13	1.97e-15	2.1e-16	1.01581e-13	1.5	3.34784e+19	9.50118e+19	65952.5	242985	6.09125e-15	578741	14389.7	38400	800	6.32772	Portenga et al., 2015, Geomorphology, DOI:10.1016/j.geomorph.2014.09.027
02-127-xf	439	CH-04	2020-09-23	21.3826	2644.5	0.0026445	0.07	59.5664	5.95664e-14	6.72638e-16	9.6939e-16	5.88938e-14	1.5	3.34784e+19	5.90225e+19	22518.9	163368	5.75898e-15	339909	15896.5	21800	700	7.49396	Portenga et al., 2015, Geomorphology, DOI:10.1016/j.geomorph.2014.09.027
02-135-xf	447	CH-14	2021-11-30	16.4687	4061.3	0.0040613	0.827	53.5899	5.35899e-14	4.47105e-15	1.42e-15	4.91189e-14	1.5	3.34784e+19	9.0644e+19	149684	285871	3.88019e-15	351716	21356.6	41200	1100	6.93861	Portenga et al., 2015, Geomorphology, DOI:10.1016/j.geomorph.2014.09.027
02-138-xf	444	CH-10	2021-08-24	24.63	4759	0.004759	0.482	61.2384	6.12384e-14	1.74387e-15	5.52607e-16	5.94945e-14	1.5	3.34784e+19	1.06216e+20	58382.1	261718	3.76373e-15	399768	16230.9	47400	1000	5.52147	Portenga et al., 2015, Geomorphology, DOI:10.1016/j.geomorph.2014.09.027
02-139-xf	442	CH-16	2021-11-30	40.8306	4398.9	0.0043989	0.952	94.397	9.4397e-14	1.97e-15	2.1e-16	9.2427e-14	1.5	3.34784e+19	9.81789e+19	65952.5	225366	4.91857e-15	482900	11826.9	35600	700	6.33051	Portenga et al., 2015, Geomorphology, DOI:10.1016/j.geomorph.2014.09.027
02-145-xf	447	CH-09	2020-10-28	26.6749	4756.8	0.0047568	0.396	83.2511	8.32511e-14	4.47105e-15	1.42e-15	7.878e-14	1.5	3.34784e+19	1.06167e+20	149684	325730	7.27096e-15	771935	28938.6	45500	1000	7.15891	Portenga et al., 2015, Geomorphology, DOI:10.1016/j.geomorph.2014.09.027
02-152-xf	444	CH-16	2021-11-30	40.0731	5819.5	0.0058195	0.392	147.322	1.47322e-13	1.74387e-15	5.52607e-16	1.45578e-13	1.5	3.34784e+19	1.29885e+20	58382.1	476044	6.25779e-15	812794	20282.8	76800	1500	6.19849	Portenga et al., 2015, Geomorphology, DOI:10.1016/j.geomorph.2014.09.027
02-209-xf	448	CH-10	2021-08-24	22.8883	6257	0.006257	0.533	35.7075	3.57075e-14	1.97e-15	2.1e-16	3.37375e-14	1.5	3.34784e+19	1.3965e+20	65952.5	214983	2.66438e-15	372080	16256.3	31600	900	6.80325	Portenga et al., 2015, Geomorphology, DOI:10.1016/j.geomorph.2014.09.027
02-212-xf	448	CH-10	2021-08-24	26.6688	6208.1	0.0062081	0.741	28.8722	2.88722e-14	1.97e-15	2.1e-16	2.69022e-14	1.5	3.34784e+19	1.38558e+20	65952.5	147533	2.69031e-15	372765	13977.6	24500	800	6.02176	Portenga et al., 2015, Geomorphology, DOI:10.1016/j.geomorph.2014.09.027
02-223-xf	448	CH-10	2021-08-24	21.033	5960.8	0.0059608	0.003	61.7618	6.17618e-14	1.97e-15	2.1e-16	5.97918e-14	1.5	3.34784e+19	1.33039e+20	65952.5	387523	3.89445e-15	518113	24633.4	56800	1400	6.82258	Portenga et al., 2015, Geomorphology, DOI:10.1016/j.geomorph.2014.09.027
02-232-xf	439	CH-16	2021-11-30	40.3409	5897.7	0.0058977	1.117	299.514	2.99514e-13	6.72638e-16	9.6939e-16	2.98841e-13	1.5	3.34784e+19	1.31631e+20	22518.9	976743	1.09642e-14	1.44322e+06	35775.7	142800	2700	6.83993	Portenga et al., 2015, Geomorphology, DOI:10.1016/j.geomorph.2014.09.027
99-17-xf	442	CH-10	2021-08-24	40.0164	4534.1	0.0045341	0.531	233.213	2.33213e-13	1.97e-15	2.1e-16	2.31243e-13	1.5	3.34784e+19	1.01196e+20	65952.5	588118	7.7671e-15	786003	19642	93700	1500	6.27661	Portenga et al., 2015, Geomorphology, DOI:10.1016/j.geomorph.2014.09.027
99-19-xf	439	CH-11	2021-08-24	40.2856	4872.7	0.0048727	0.52	196.641	1.96641e-13	6.72638e-16	9.6939e-16	1.95968e-13	1.5	3.34784e+19	1.08754e+20	22518.9	530286	7.36765e-15	801259	19889.5	73500	1300	7.21478	Portenga et al., 2015, Geomorphology, DOI:10.1016/j.geomorph.2014.09.027
BRA-03	532	CH-06	2020-10-28	20.0545	2280	0.00228	0.087	175.009	1.75009e-13	2.37091e-15	1.83719e-15	1.72638e-13	1.5	3.34784e+19	5.08872e+19	79374.5	440118	7.98867e-15	406521	20270.8	62000	3000	7.09868	Sosa Gonzalez et al., 2016, Geomorphology, DOI:10.1016/j.geomorph.2016.05.024
BRA-21	541	CH-06	2020-10-28	20.4223	3713.5	0.0037135	0.7	349.972	3.49972e-13	2.37091e-15	1.83719e-15	3.47601e-13	1.5	3.34784e+19	8.28815e+19	79374.5	1.41643e+06	1.37449e-14	1.1392e+06	55782.1	241000	5000	5.87731	Sosa Gonzalez et al., 2016, Geomorphology, DOI:10.1016/j.geomorph.2016.05.024
BRA-47	541	CH-06	2020-10-28	21.2171	2410.9	0.0024109	0.16	638.371	6.38371e-13	2.37091e-15	1.83719e-15	6.36e-13	1.5	3.34784e+19	5.38088e+19	79374.5	1.61523e+06	2.2559e-14	1.21387e+06	57212	238000	5000	6.7867	Sosa Gonzalez et al., 2016, Geomorphology, DOI:10.1016/j.geomorph.2016.05.024
C_NATA	459	CH-09	2020-10-28	12.3294	3977.6	0.0039776	0.56	29.4162	2.94162e-14	2.03971e-15	1.02105e-15	2.73765e-14	1.5	3.34784e+19	8.87759e+19	68286.3	206268	3.80504e-15	337796	27397.6	137000	2600	1.50561	Sosa Gonzalez et al., 2016, Geomorphology, DOI:10.1016/j.geomorph.2016.04.025
CAIM	453	CH-14	2021-11-30	31.3389	5557.6	0.0055576	0.914	201.38	2.0138e-13	8.49844e-16	6.67483e-16	2.0053e-13	1.5	3.34784e+19	1.2404e+20	28451.5	796157	7.09905e-15	880565	28098.2	95400	1800	8.34547	Sosa Gonzalez et al., 2016, Geomorphology, DOI:10.1016/j.geomorph.2016.04.025
CH-065	524	CH-02	2019-07-11	15.4863	2644.5	0.0026445	0.268	227.53	2.2753e-13	2.37091e-15	1.83719e-15	2.25159e-13	1.5	3.34784e+19	5.90225e+19	79374.5	862053	8.02891e-15	473886	30600.4	135000	4200	6.38558	Schmidt et al., 2016, Earth Surface Dynamics, DOI:10.1016/j.geomorph.2016.05.024
CH-066	524	CH-15	2021-11-30	18.836	3441.3	0.0034413	0.581	303.641	3.03641e-13	2.37091e-15	1.83719e-15	3.0127e-13	1.5	3.34784e+19	7.68063e+19	79374.5	1.23392e+06	9.24946e-15	710416	37715.9	209000	4440	5.90393	Schmidt et al., 2016, Earth Surface Dynamics, DOI:10.1016/j.geomorph.2016.05.024
CH-070	524	CH-06	2020-10-28	20.2506	3228.5	0.0032285	0.185	231.858	2.31858e-13	2.37091e-15	1.83719e-15	2.29487e-13	1.5	3.34784e+19	7.20568e+19	79374.5	821090	8.89296e-15	640798	31643.4	119000	5170	6.89991	Schmidt et al., 2016, Earth Surface Dynamics, DOI:10.1016/j.geomorph.2016.05.024
CH-079	533	CH-06	2020-10-28	9.7717	2414.2	0.0024142	0.001	221.85	2.2185e-13	2.37091e-15	1.83719e-15	2.19479e-13	1.5	3.34784e+19	5.38824e+19	79374.5	1.21519e+06	9.23618e-15	497668	50929.5	176000	8610	6.90447	Schmidt et al., 2016, Earth Surface Dynamics, DOI:10.1016/j.geomorph.2016.05.024
CH-080	531	CH-06	2020-10-28	20.0181	3402.8	0.0034028	1.189	310.111	3.10111e-13	2.37091e-15	1.83719e-15	3.0774e-13	1.5	3.34784e+19	7.5947e+19	79374.5	1.17257e+06	1.01303e-14	769365	38433.5	190000	4700	6.17142	Schmidt et al., 2016, Earth Surface Dynamics, DOI:10.1016/j.geomorph.2016.05.024
CH-119	557	CH-15	2021-11-30	20.3249	3639.9	0.0036399	3.141	125.607	1.25607e-13	2.37091e-15	1.83719e-15	1.23236e-13	1.5	3.34784e+19	8.12388e+19	79374.5	498147	5.90834e-15	479986	23615.7	81000	3000	6.14996	Sosa Gonzalez et al., 2017, Earth Surface Processes and Landforms, DOI:10.1002/esp.4205
CH-129	559	CH-15	2021-11-30	19.9402	5107.9	0.0051079	2.697	178.421	1.78421e-13	2.37091e-15	1.83719e-15	1.7605e-13	1.5	3.34784e+19	1.14003e+20	79374.5	1.0161e+06	6.28615e-15	716640	35939.5	160000	4000	6.3506	Sosa Gonzalez et al., 2017, Earth Surface Processes and Landforms, DOI:10.1002/esp.4205
CHAN	468	CH-02	2019-07-11	5.2963	2050.4	0.0020504	1.518	17.6197	1.76197e-14	8.58127e-16	6.74033e-16	1.67616e-14	1.5	3.34784e+19	4.57628e+19	28728.8	146819	1.84655e-15	84503.3	15955.2	39400	1200	3.72637	Sosa Gonzalez et al., 2016, Geomorphology, DOI:10.1016/j.geomorph.2016.04.025
CHIVE_H	466	CH-08	2020-10-28	16.7017	3504	0.003504	2.647	59.0865	5.90865e-14	1.99913e-15	8.95392e-16	5.70874e-14	1.5	3.34784e+19	7.82057e+19	66927.8	272665	5.02104e-15	392674	23511	36100	1300	7.55305	Sosa Gonzalez et al., 2016, Geomorphology, DOI:10.1016/j.geomorph.2016.04.025
CU-014	649	CH-08	2020-10-28	31.7777	5041.6	0.0050416	1.21	89.1508	8.91508e-14	5.57515e-15	1.54831e-15	8.35757e-14	1.5	3.34784e+19	1.12523e+20	186647	309805	6.76246e-15	760934	23945.5	44200	1690	7.00917	Campbell et al., 2022, Gchron, DOI: 10.5194/gchron-4-435-2022
CU-015	656	CH-07	2020-10-28	20.6631	4906.38	0.00490638	0.784617	124.58	1.2458e-13	2.37091e-15	1.83719e-15	1.22209e-13	1.5	3.34784e+19	1.09505e+20	79374.5	656377	5.38715e-15	589921	28549.5	102684	3942.03	6.39222	Campbell et al., 2022, Gchron, DOI: 10.5194/gchron-4-435-2022
CU-016	656	CH-07	2020-10-28	21.6084	2621.71	0.00262171	0.212854	280.209	2.80209e-13	2.37091e-15	1.83719e-15	2.77838e-13	1.5	3.34784e+19	5.85139e+19	79374.5	755112	1.17522e-14	687667	31824.1	259863	6584.83	2.9058	Campbell et al., 2022, Gchron, DOI: 10.5194/gchron-4-435-2022
CU-101	649	CH-01	2019-07-11	36.7486	3424.8	0.0034248	0.381	350.399	3.50399e-13	5.57515e-15	1.54831e-15	3.44824e-13	1.5	3.34784e+19	7.6438e+19	186647	723759	1.20723e-14	922782	25110.7	113096	2408.75	6.39949	Campbell et al., 2022, Gchron, DOI: 10.5194/gchron-4-435-2022
CU-106	656	CH-07	2020-10-28	10.528	1713.72	0.00171372	0.785144	1014.15	1.01415e-12	2.37091e-15	1.83719e-15	1.01178e-12	1.5	3.34784e+19	3.82485e+19	79374.5	3.67689e+06	3.3608e-14	1.28545e+06	122099	966190	18119.7	3.80556	Campbell et al., 2022, Gchron, DOI: 10.5194/gchron-4-435-2022
CU-109	656	CH-07	2020-10-28	12.099	4440.88	0.00444088	0.900223	60.6035	6.06035e-14	2.37091e-15	1.83719e-15	5.82326e-14	1.5	3.34784e+19	9.91159e+19	79374.5	489908	4.26254e-15	422486	34919.1	70301.5	3738.51	6.96868	Campbell et al., 2022, Gchron, DOI: 10.5194/gchron-4-435-2022
CU-110	656	CH-07	2020-10-28	21.9193	1250.6	0.0012506	0.744772	745.503	7.45503e-13	2.37091e-15	1.83719e-15	7.43132e-13	1.5	3.34784e+19	2.79122e+19	79374.5	945707	2.76792e-14	772587	35246.9	167290	4437.04	5.6531	Campbell et al., 2022, Gchron, DOI: 10.5194/gchron-4-435-2022
CU-111	656	CH-07	2020-10-28	22.3309	1492.1	0.0014921	2.59877	190.712	1.90712e-13	2.37091e-15	1.83719e-15	1.88341e-13	1.5	3.34784e+19	3.33022e+19	79374.5	280856	1.12193e-14	373628	16731.4	40600.2	1951.45	6.91759	Campbell et al., 2022, Gchron, DOI: 10.5194/gchron-4-435-2022
CU-112	656	CH-07	2020-10-28	21.7435	1708.05	0.00170805	0.594267	718.675	7.18675e-13	2.37091e-15	1.83719e-15	7.16304e-13	1.5	3.34784e+19	3.8122e+19	79374.5	1.25637e+06	2.56016e-14	975983	44886.2	200465	6627.66	6.26728	Campbell et al., 2022, Gchron, DOI: 10.5194/gchron-4-435-2022
CU-113	649	CH-01	2019-07-11	36.5307	2700.9	0.0027009	0.068	730.431	7.30431e-13	5.57515e-15	1.54831e-15	7.24856e-13	1.5	3.34784e+19	6.02813e+19	186647	1.20021e+06	2.20001e-14	1.32619e+06	36303.6	193852	4519.5	6.1914	Campbell et al., 2022, Gchron, DOI: 10.5194/gchron-4-435-2022
CU-114	649	CH-08	2020-10-28	42.507	3670.6	0.0036706	0.457	385.015	3.85015e-13	5.57515e-15	1.54831e-15	3.7944e-13	1.5	3.34784e+19	8.1924e+19	186647	737651	1.78571e-14	1.46292e+06	34416.1	106000	2840	6.95897	Campbell et al., 2022, Gchron, DOI: 10.5194/gchron-4-435-2022
CU-115	656	CH-07	2020-10-28	21.8054	1525.29	0.00152529	0.337055	441.999	4.41999e-13	2.37091e-15	1.83719e-15	4.39628e-13	1.5	3.34784e+19	3.4043e+19	79374.5	686416	1.91082e-14	650500	29832.1	81490.6	3259.56	8.42326	Campbell et al., 2022, Gchron, DOI: 10.5194/gchron-4-435-2022
CU-116	649	CH-08	2020-10-28	43.0717	5894.4	0.0058944	0.56	239.287	2.39287e-13	5.57515e-15	1.54831e-15	2.33712e-13	1.5	3.34784e+19	1.31557e+20	186647	726538	1.28507e-14	1.6906e+06	39250.8	111000	2400	6.54538	Campbell et al., 2022, Gchron, DOI: 10.5194/gchron-4-435-2022
CU-117	649	CH-08	2020-10-28	25.1622	5982.8	0.0059828	1.107	58.6533	5.86533e-14	5.57515e-15	1.54831e-15	5.30782e-14	1.5	3.34784e+19	1.3353e+20	186647	303842	5.02039e-15	670372	26642	51100	2680	5.94602	Campbell et al., 2022, Gchron, DOI: 10.5194/gchron-4-435-2022
CU-119	656	CH-07	2020-10-28	22.2265	5028.8	0.0050288	1.22375	451.773	4.51773e-13	2.37091e-15	1.83719e-15	4.49402e-13	1.5	3.34784e+19	1.12238e+20	79374.5	2.27776e+06	1.86267e-14	2.09062e+06	94059.6	386730	7500.86	5.88978	Campbell et al., 2022, Gchron, DOI: 10.5194/gchron-4-435-2022
CU-121	656	CH-07	2020-10-28	21.6661	3765.5	0.0037655	0.392269	846.88	8.4688e-13	2.37091e-15	1.83719e-15	8.44509e-13	1.5	3.34784e+19	8.40421e+19	79374.5	3.28136e+06	2.4361e-14	2.04735e+06	94495.6	740601	14257.7	4.43067	Campbell et al., 2022, Gchron, DOI: 10.5194/gchron-4-435-2022
CUL	448	CH-13	2021-08-24	8.114	2223	0.002223	0.567	17.963	1.7963e-14	1.97e-15	2.1e-16	1.5993e-14	1.5	3.34784e+19	4.96151e+19	65952.5	101711	2.79095e-15	138473	17066	13100	1000	7.7642	Sosa Gonzalez et al., 2016, Geomorphology, DOI:10.1016/j.geomorph.2016.04.025
DC-01-17	462	CH-04	2020-09-23	22.5953	2091.5	0.0020915	0.591	2204.91	2.20491e-12	1.30174e-15	1.31743e-15	2.20361e-12	1.5	3.34784e+19	4.66801e+19	43580.2	4.55324e+06	5.43811e-14	2.53852e+06	112347	634000	8280	7.18177	Dethier et al., 2014, Geology, DOI:10.1130/G34922.1
GC-74	465	CH-14	2021-11-30	20.0337	2711.3	0.0027113	1.049	214.666	2.14666e-13	1.74436e-15	1.20787e-15	2.12922e-13	1.5	3.34784e+19	6.05134e+19	58398.5	645501	1.0612e-14	642168	32054.4	94300	1900	6.84519	Nichols et al., 2011, Geological Society of America Abstracts with Programs
GCHC-78	450	CH-09	2020-10-28	20.4454	2638.2	0.0026382	0.099	288.151	2.88151e-13	4.02373e-15	1.42722e-15	2.84127e-13	1.5	3.34784e+19	5.88819e+19	134708	823274	1.88468e-14	1.10974e+06	54278	114000	2700	7.2217	Nichols et al., 2011, Geological Society of America Abstracts with Programs
GCMC-93	449	CH-02	2019-07-11	20.7823	2114.8	0.0021148	0.285	164.154	1.64154e-13	8.53032e-16	6.70033e-16	1.63301e-13	1.5	3.34784e+19	4.72001e+19	28558.2	371448	6.69416e-15	315965	15203.6	50200	1100	7.39935	Nichols et al., 2011, Geological Society of America Abstracts with Programs
GCPR-0	451	CH-09	2020-10-28	20.0113	1677.3	0.0016773	0.551	177.679	1.77679e-13	2.37091e-15	1.83719e-15	1.75308e-13	1.5	3.34784e+19	3.74356e+19	79374.5	328422	1.08436e-14	405937	20285.4	46800	1100	7.01756	Nichols et al., 2011, Geological Society of America Abstracts with Programs
GCSC-190	450	CH-09	2020-10-28	20.2175	1947.1	0.0019471	0.767	238.314	2.38314e-13	4.02373e-15	1.42722e-15	2.3429e-13	1.5	3.34784e+19	4.34573e+19	134708	505590	1.26009e-14	547601	27085.5	82300	1900	6.14325	Nichols et al., 2011, Geological Society of America Abstracts with Programs
GCSC-205	450	CH-09	2020-10-28	15.1737	1987.7	0.0019877	1.169	385.975	3.85975e-13	4.02373e-15	1.42722e-15	3.81951e-13	1.5	3.34784e+19	4.43634e+19	134708	1.1196e+06	1.68718e-14	748490	49328.1	156000	4900	7.17692	Nichols et al., 2011, Geological Society of America Abstracts with Programs
GCSC-92	450	CH-09	2020-10-28	20.8302	2938.2	0.0029382	0.746	126.508	1.26508e-13	4.02373e-15	1.42722e-15	1.22484e-13	1.5	3.34784e+19	6.55776e+19	134708	391805	8.75007e-15	573808	27546.9	65100	1400	6.01851	Nichols et al., 2011, Geological Society of America Abstracts with Programs
GCTR-68	449	CH-02	2019-07-11	20.2337	1982.1	0.0019821	0.048	206.204	2.06204e-13	8.53032e-16	6.70033e-16	2.05351e-13	1.5	3.34784e+19	4.42384e+19	28558.2	449428	7.44597e-15	329398	16279.7	61900	1700	7.26054	Nichols et al., 2011, Geological Society of America Abstracts with Programs
GLOR	468	CH-14	2021-11-30	9.1158	2842.2	0.0028422	2.915	24.1246	2.41246e-14	8.58127e-16	6.74033e-16	2.32665e-14	1.5	3.34784e+19	6.3435e+19	28728.8	164727	2.49455e-15	158242	17359.1	35400	1500	4.65329	Sosa Gonzalez et al., 2016, Geomorphology, DOI:10.1016/j.geomorph.2016.04.025
IND	455	CH-14	2021-11-30	24.8102	4555.3	0.0045553	0.972	102.352	1.02352e-13	2.37091e-15	1.83719e-15	9.99811e-14	1.5	3.34784e+19	1.0167e+20	79374.5	416228	4.97752e-15	506062	20397.4	66400	1800	6.2685	Sosa Gonzalez et al., 2016, Geomorphology, DOI:10.1016/j.geomorph.2016.04.025
JP08003	440	CH-11	2021-08-24	21.6644	2119.9	0.0021199	0.071	159.378	1.59378e-13	1.31162e-15	1.03034e-15	1.58066e-13	1.5	3.34784e+19	4.7314e+19	43911	346047	6.29848e-15	298006	13755.6	50500	1300	6.85241	Regalla et al., 2013, Geomorphology, DOI:10.1016/j.geomorph.2013.04.029
JP08004	440	CH-03	2020-09-23	21.8578	1929.4	0.0019294	0.412	173.33	1.7333e-13	1.31162e-15	1.03034e-15	1.72018e-13	1.5	3.34784e+19	4.30622e+19	43911	339470	9.58983e-15	412959	18893	50400	1200	6.73551	Regalla et al., 2013, Geomorphology, DOI:10.1016/j.geomorph.2013.04.029
JP08014	440	CH-11	2021-08-24	21.9531	1997.6	0.0019976	0.082	236.012	2.36012e-13	1.31162e-15	1.03034e-15	2.347e-13	1.5	3.34784e+19	4.45844e+19	43911	477315	8.83735e-15	394008	17947.7	73500	1700	6.49408	Regalla et al., 2013, Geomorphology, DOI:10.1016/j.geomorph.2013.04.029
LO18-4	610	CH-15	2021-11-30	22.0209	4279.7	0.0042797	0.753	294.362	2.94362e-13	2.37091e-15	1.83719e-15	2.91991e-13	1.5	3.34784e+19	9.55185e+19	79374.5	1.27323e+06	1.01767e-14	972063	44142.7	203935	5395	6.24331	Fernandes et al., 2014, American Geophysical Union Fall Meeting Abstracts, ID: EP23A-3585
LO18-5	610	CH-15	2021-11-30	22.9477	4590.2	0.0045902	0.721	169.677	1.69677e-13	2.37091e-15	1.83719e-15	1.67306e-13	1.5	3.34784e+19	1.02449e+20	79374.5	754053	1.14356e-14	1.17156e+06	51053.5	110853	3048	6.80228	Fernandes et al., 2014, American Geophysical Union Fall Meeting Abstracts, ID: EP23A-3585
MJ-BC-17	467	CH-08	2020-10-28	20.1334	3008.3	0.0030083	3871	2089.85	2.08985e-12	4.31662e-16	6.22163e-16	2.08942e-12	1.5	3.34784e+19	6.71421e+19	14451.4	6.96865e+06	7.08437e-14	4.7566e+06	236254	1140000	13900	6.11285	Dethier et al., 2014, Geology, DOI:10.1130/G34922.1
MRC-01	443	CH-10	2021-08-24	21.2408	3474.5	0.0034745	0.405	903.937	9.03937e-13	2.85978e-15	7.65384e-16	9.01077e-13	1.5	3.34784e+19	7.75472e+19	95741	3.29564e+06	2.26946e-14	1.7599e+06	82854.9	566686	11333.7	5.81564	Cox et al., 2009, The Journal of Geology, DOI:10.1086/598945
MRC-05	443	CH-10	2021-08-24	21.15	2076	0.002076	0.626	4797.41	4.79741e-12	2.85978e-15	7.65384e-16	4.79455e-12	1.5	3.34784e+19	4.63342e+19	95741	1.05054e+07	1.00483e-13	4.6558e+06	220132	1.86157e+06	37031.4	5.64327	Cox et al., 2009, The Journal of Geology, DOI:10.1086/598945
MRC-09	443	CH-10	2021-08-24	21.6847	2053.1	0.0020531	0.205	322.645	3.22645e-13	2.85978e-15	7.65384e-16	3.19785e-13	1.5	3.34784e+19	4.58231e+19	95741	677383	1.10845e-14	507926	23423.2	114339	2286.78	5.92434	Cox et al., 2009, The Journal of Geology, DOI:10.1086/598945
MRC-11	443	CH-16	2021-11-30	21.9538	2032.3	0.0020323	0.016	213.294	2.13294e-13	2.85978e-15	7.65384e-16	2.10434e-13	1.5	3.34784e+19	4.53588e+19	95741	436326	1.28924e-14	584784	26637	66632	1332.64	6.5483	Cox et al., 2009, The Journal of Geology, DOI:10.1086/598945
MRC-14	445	CH-09	2020-10-28	20.1731	1590	0.00159	0.376	190.263	1.90263e-13	2.9776e-16	4.29096e-16	1.89965e-13	1.5	3.34784e+19	3.54872e+19	9968.54	334204	1.1888e-14	421871	20912.6	44651.5	893	7.48471	Cox et al., 2009, The Journal of Geology, DOI:10.1086/598945
MRC-17	445	CH-16	2021-11-30	22.2066	2006.1	0.0020061	0.44	3986.82	3.98682e-12	2.9776e-16	4.29096e-16	3.98652e-12	1.5	3.34784e+19	4.47741e+19	9968.54	8.03798e+06	7.50487e-14	3.36024e+06	151317	1425072	28501.4	5.6404	Cox et al., 2009, The Journal of Geology, DOI:10.1086/598945
MRC-18	445	CH-02	2019-07-11	21.738	2018.9	0.0020189	0.291	2355.83	2.35583e-12	2.9776e-16	4.29096e-16	2.35553e-12	1.5	3.34784e+19	4.50598e+19	9968.54	4.88284e+06	4.40534e-14	1.98504e+06	91316.4	876655	17533.1	5.56985	Cox et al., 2009, The Journal of Geology, DOI:10.1086/598945
MRC-21	445	CH-16	2021-11-30	21.5484	3114	0.003114	0.37	277.525	2.77525e-13	2.9776e-16	4.29096e-16	2.77227e-13	1.5	3.34784e+19	6.95013e+19	9968.54	894654	7.38211e-15	513066	23809.9	123667	2473.34	7.23439	Cox et al., 2009, The Journal of Geology, DOI:10.1086/598945
MRC-24	446	CH-16	2021-11-30	19.9489	2429.7	0.0024297	0.003	304.28	3.0428e-13	4.90787e-15	1.1926e-15	2.99372e-13	1.5	3.34784e+19	5.42284e+19	164308	818907	7.83612e-15	424940	21301.4	142399	2847.99	5.75079	Cox et al., 2009, The Journal of Geology, DOI:10.1086/598945
MRC-25	446	CH-16	2021-11-30	20.1542	3166.2	0.0031662	0.534	830.296	8.30296e-13	4.90787e-15	1.1926e-15	8.25388e-13	1.5	3.34784e+19	7.06663e+19	164308	2.9031e+06	1.51572e-14	1.0711e+06	53145.4	488385	9767.71	5.94428	Cox et al., 2009, The Journal of Geology, DOI:10.1086/598945
MRC-26	446	CH-16	2021-11-30	20.0262	2276.5	0.0022765	0.664	411.064	4.11064e-13	4.90787e-15	1.1926e-15	4.06156e-13	1.5	3.34784e+19	5.08091e+19	164308	1.03472e+06	1.01002e-14	513182	25625.5	163612	3272.25	6.32423	Cox et al., 2009, The Journal of Geology, DOI:10.1086/598945
MRC-29	446	CH-02	2019-07-11	20.2738	2052.4	0.0020524	0.073	1441.06	1.44106e-12	4.90787e-15	1.1926e-15	1.43615e-12	1.5	3.34784e+19	4.58074e+19	164308	3.24789e+06	2.96211e-14	1.35687e+06	66927.1	502432	10048.6	6.46433	Cox et al., 2009, The Journal of Geology, DOI:10.1086/598945
MRC-30	446	CH-14	2021-11-30	20.3598	2030.8	0.0020308	0.144	761.976	7.61976e-13	4.90787e-15	1.1926e-15	7.57068e-13	1.5	3.34784e+19	4.53254e+19	164308	1.68825e+06	2.33279e-14	1.05735e+06	51933	256130	5122.61	6.59138	Cox et al., 2009, The Journal of Geology, DOI:10.1086/598945
MRC-31	446	CH-08	2020-10-28	21.3586	2343.8	0.0023438	0.243	966.952	9.66952e-13	4.90787e-15	1.1926e-15	9.62044e-13	1.5	3.34784e+19	5.23112e+19	164308	2.36055e+06	3.18538e-14	1.66631e+06	78015.9	401117	8020	5.88495	Cox et al., 2009, The Journal of Geology, DOI:10.1086/598945
PACORA	459	CH-09	2020-10-28	25.1835	3043.2	0.0030432	1.463	31.5237	3.15237e-14	2.03971e-15	1.02105e-15	2.9484e-14	1.5	3.34784e+19	6.79211e+19	68286.3	82309.3	3.39486e-15	230582	9156.09	10900	500	7.55132	Sosa Gonzalez et al., 2016, Geomorphology, DOI:10.1016/j.geomorph.2016.04.025
PAN06	459	CH-14	2021-11-30	33.9791	4385.5	0.0043855	2.819	84.0956	8.40956e-14	2.03971e-15	1.02105e-15	8.20559e-14	1.5	3.34784e+19	9.78798e+19	68286.3	240235	4.51341e-15	441772	13001.3	36100	900	6.65471	Sosa Gonzalez et al., 2016, Geomorphology, DOI:10.1016/j.geomorph.2016.04.025
PERE	455	CH-14	2021-11-30	29.9906	4884.5	0.0048845	0.342	208.464	2.08464e-13	2.37091e-15	1.83719e-15	2.06093e-13	1.5	3.34784e+19	1.09017e+20	79374.5	755128	7.97257e-15	869146	28980.6	112400	2100	6.71822	Sosa Gonzalez et al., 2016, Geomorphology, DOI:10.1016/j.geomorph.2016.04.025
POT01	433	CH-12	2021-08-24	20.2835	1989.6	0.0019896	0.506	740.75	7.4075e-13	5.81847e-16	4.57011e-16	7.40168e-13	1.5	3.34784e+19	4.44058e+19	19479.3	1.62073e+06	1.65181e-14	733500	36162.4	283000	5500	5.72697	Portenga et al., 2019, GSA Bulletin, DOI:10.1130/B31840.1
POT12	433	CH-12	2021-08-24	20.4943	2778.4	0.0027784	0.607	989.706	9.89706e-13	5.81847e-16	4.57011e-16	9.89124e-13	1.5	3.34784e+19	6.2011e+19	19479.3	2.99367e+06	1.94115e-14	1.20373e+06	58734.7	500000	9600	5.98734	Portenga et al., 2019, GSA Bulletin, DOI:10.1130/B31840.1
POT30	435	CH-03	2020-09-23	20.5498	1976.5	0.0019765	0.102	849.239	8.49239e-13	9.25754e-16	8.86594e-16	8.48313e-13	1.5	3.34784e+19	4.41134e+19	30992.8	1.82152e+06	2.61191e-14	1.1522e+06	56068.8	309000	7400	5.89489	Portenga et al., 2019, GSA Bulletin, DOI:10.1130/B31840.1
POT39	436	CH-03	2020-09-23	20.119	2229.7	0.0022297	0.348	1462.8	1.4628e-12	8.88635e-15	2.04804e-15	1.45391e-12	1.5	3.34784e+19	4.97646e+19	297501	3.60347e+06	4.43723e-14	2.20817e+06	109755	554000	12800	6.50445	Portenga et al., 2019, GSA Bulletin, DOI:10.1130/B31840.1
POT42	436	CH-03	2020-09-23	18.5351	2325.9	0.0023259	0.007	2188.73	2.18873e-12	8.88635e-15	2.04804e-15	2.17984e-12	1.5	3.34784e+19	5.19117e+19	297501	6.11398e+06	5.43871e-14	2.82333e+06	152323	1110000	18300	5.50809	Portenga et al., 2019, GSA Bulletin, DOI:10.1130/B31840.1
POT48	436	CH-12	2021-08-24	18.6625	3354.7	0.0033547	0.585	1197.55	1.19755e-12	8.88635e-15	2.04804e-15	1.18866e-12	1.5	3.34784e+19	7.48734e+19	297501	4.7886e+06	2.35665e-14	1.7645e+06	94548.1	873000	16500	5.48522	Portenga et al., 2019, GSA Bulletin, DOI:10.1130/B31840.1
POT51	437	CH-11	2021-08-24	21.4089	2961.23	0.00296123	0.716	445.491	4.45491e-13	4.62568e-16	6.66627e-16	4.45029e-13	1.5	3.34784e+19	6.60915e+19	15486.1	1.37455e+06	1.14932e-14	759603	35480.7	379000	7300	3.62679	Portenga et al., 2019, GSA Bulletin, DOI:10.1130/B31840.1
POT53	437	CH-03	2020-09-23	14.5076	1966.2	0.0019662	0.943	1224.08	1.22408e-12	4.62568e-16	6.66627e-16	1.22362e-12	1.5	3.34784e+19	4.38835e+19	15486.1	3.70161e+06	3.42509e-14	1.50305e+06	103604	572000	9600	6.47135	Portenga et al., 2019, GSA Bulletin, DOI:10.1130/B31840.1
POT62	437	CH-11	2021-08-24	9.8105	1915.57	0.00191557	1.241	822.303	8.22303e-13	4.62568e-16	6.66627e-16	8.2184e-13	1.5	3.34784e+19	4.27536e+19	15486.1	3.58197e+06	1.8779e-14	802869	81837.8	307000	7600	11.6677	Portenga et al., 2019, GSA Bulletin, DOI:10.1130/B31840.1
POT72	438	CH-11	2021-08-24	22.1316	2006.3	0.0020063	0.253	786.745	7.86745e-13	3.223e-15	1.00748e-15	7.83522e-13	1.5	3.34784e+19	4.47785e+19	107901	1.58693e+06	1.83227e-14	820464	37072	246000	5800	6.45095	Portenga et al., 2019, GSA Bulletin, DOI:10.1130/B31840.1
QLD04	401	CH-04	2020-09-23	10.8924	2618	0.002618	0.195	121.41	1.2141e-13	2.37091e-15	1.83719e-15	1.19039e-13	1.5	3.34784e+19	5.8431e+19	79374.5	644003	9.16654e-15	535611	49172.9	231000	1000	2.78789	Nichols et al., 2014, Geomorphology, DOI:10.1016/j.geomorph.2014.07.019
QLD11	420	CH-12	2021-08-24	20.2582	3827.9	0.0038279	0.054	270.703	2.70703e-13	2.56961e-15	1.15308e-15	2.68133e-13	1.5	3.34784e+19	8.54348e+19	86026.6	1.13739e+06	8.7343e-15	746213	36835.1	189000	3000	6.01792	Nichols et al., 2014, Geomorphology, DOI:10.1016/j.geomorph.2014.07.019
QLD14	420	CH-12	2021-08-24	8.5875	2202.1	0.0022021	0.365	80.6853	8.06853e-14	2.56961e-15	1.15308e-15	7.81157e-14	1.5	3.34784e+19	4.91486e+19	86026.6	451766	4.58706e-15	225448	26253	66000	2000	6.84494	Nichols et al., 2014, Geomorphology, DOI:10.1016/j.geomorph.2014.07.019
QLD2	420	CH-12	2021-08-24	10.8795	2254.1	0.0022541	0.272	241.04	2.4104e-13	2.56961e-15	1.15308e-15	2.3847e-13	1.5	3.34784e+19	5.03092e+19	86026.6	1.10671e+06	1.11458e-14	560736	51540.6	172000	5000	6.43439	Nichols et al., 2014, Geomorphology, DOI:10.1016/j.geomorph.2014.07.019
QLD8	420	CH-12	2021-08-24	19.7773	2843.9	0.0028439	0.376	399.814	3.99814e-13	2.56961e-15	1.15308e-15	3.97244e-13	1.5	3.34784e+19	6.34729e+19	86026.6	1.27881e+06	9.87862e-15	627025	31704.3	197000	3000	6.4914	Nichols et al., 2014, Geomorphology, DOI:10.1016/j.geomorph.2014.07.019
QVP034	490	CH-14	2021-11-30	20.0326	2068.5	0.0020685	0.329	407.162	4.07162e-13	2.37091e-15	1.83719e-15	4.04791e-13	1.5	3.34784e+19	4.61668e+19	79374.5	934376	1.13246e-14	522820	26098.5	127406	3112.89	7.33382	McPhillips et al., 2014, Nature Geoscience, DOI:10.1038/ngeo2278
SAP03	403	CH-13	2021-08-24	20.2925	2154.8	0.0021548	0.151	1412.85	1.41285e-12	3.32976e-15	9.62352e-16	1.40952e-12	1.5	3.34784e+19	4.80929e+19	111475	3.34294e+06	3.07262e-14	1.47771e+06	72820.6	624000	18000	5.35727	Reusser et al., 2015, Geology, DOI:10.1130/G36272.1
SAP04	403	CH-13	2021-08-24	17.976	2181.1	0.0021811	0.178	1071.13	1.07113e-12	3.32976e-15	9.62352e-16	1.0678e-12	1.5	3.34784e+19	4.86799e+19	111475	2.89447e+06	2.37363e-14	1.15548e+06	64279.1	550000	16000	5.26268	Reusser et al., 2015, Geology, DOI:10.1130/G36272.1
SAP12	403	CH-13	2021-08-24	20.0918	2788.2	0.0027882	0.005	935.13	9.3513e-13	3.32976e-15	9.62352e-16	9.318e-13	1.5	3.34784e+19	6.22297e+19	111475	2.8908e+06	2.05803e-14	1.28071e+06	63742.7	555000	15000	5.20865	Reusser et al., 2015, Geology, DOI:10.1130/G36272.1
SAP15	408	CH-16	2021-11-30	20.0385	1740.5	0.0017405	0.747	1894.89	1.89489e-12	5.15989e-15	1.2189e-15	1.88973e-12	1.5	3.34784e+19	3.88462e+19	172745	3.66477e+06	4.71298e-14	1.83081e+06	91364.7	638000	17000	5.74415	Reusser et al., 2015, Geology, DOI:10.1130/G36272.1
SAP17	408	CH-13	2021-08-24	19.6283	2792.4	0.0027924	0.074	516.115	5.16115e-13	5.15989e-15	1.2189e-15	5.10955e-13	1.5	3.34784e+19	6.23235e+19	172745	1.62996e+06	1.5968e-14	995181	50701.4	281000	8000	5.80057	Reusser et al., 2015, Geology, DOI:10.1130/G36272.1
SAP36	409	CH-04	2020-09-23	20.2177	1348	0.001348	0.754	1869.77	1.86977e-12	2.68771e-15	1.20285e-15	1.86708e-12	1.5	3.34784e+19	3.0086e+19	89980.4	2.77795e+06	4.83952e-14	1.45602e+06	72016.9	442000	12000	6.28496	Reusser et al., 2015, Geology, DOI:10.1130/G36272.1
SAP39	409	CH-04	2020-09-23	20.5395	1359.4	0.0013594	0.348	2562.99	2.56299e-12	2.68771e-15	1.20285e-15	2.5603e-12	1.5	3.34784e+19	3.03404e+19	89980.4	3.7816e+06	5.87239e-14	1.78171e+06	86745.4	635000	18000	5.95527	Reusser et al., 2015, Geology, DOI:10.1130/G36272.1
SAP44	409	CH-13	2021-08-24	19.9728	1152.4	0.0011524	0.119	5183.65	5.18365e-12	2.68771e-15	1.20285e-15	5.18096e-12	1.5	3.34784e+19	2.57204e+19	89980.4	6.67084e+06	1.32436e-13	3.4063e+06	170547	1261000	29000	5.29012	Reusser et al., 2015, Geology, DOI:10.1130/G36272.1
SAP49	411	CH-04	2020-09-23	20.0087	1751.8	0.0017518	0.421	1753.52	1.75352e-12	3.06579e-15	1.37219e-15	1.75045e-12	1.5	3.34784e+19	3.90984e+19	102638	3.42137e+06	4.65174e-14	1.81875e+06	90898.2	528000	13000	6.47986	Reusser et al., 2015, Geology, DOI:10.1130/G36272.1
SAP63	411	CH-13	2021-08-24	19.9522	2250.4	0.0022504	0.696	952.56	9.5256e-13	3.06579e-15	1.37219e-15	9.49494e-13	1.5	3.34784e+19	5.02266e+19	102638	2.39278e+06	2.21995e-14	1.11501e+06	55883.8	364000	10000	6.57357	Reusser et al., 2015, Geology, DOI:10.1130/G36272.1
SAP65	411	CH-13	2021-08-24	20.9599	2068.8	0.0020688	0.601	1623.81	1.62381e-12	3.06579e-15	1.37219e-15	1.62074e-12	1.5	3.34784e+19	4.61735e+19	102638	3.57227e+06	3.77248e-14	1.74188e+06	83105.6	618000	16000	5.78036	Reusser et al., 2015, Geology, DOI:10.1130/G36272.1
SAP68	417	CH-12	2021-08-24	20.1152	1961.4	0.0019614	0.369	1493.4	1.4934e-12	2.2299e-13	8.28e-15	1.27041e-12	1.5	3.34784e+19	4.37764e+19	7.46536e+06	2.87894e+06	2.91758e-14	1.27721e+06	63494.9	513000	15000	5.61196	Reusser et al., 2015, Geology, DOI:10.1130/G36272.1
SAP69	417	CH-12	2021-08-24	20.1439	2056.6	0.0020566	0.643	234.509	2.34509e-13	2.2299e-13	8.28e-15	1.1519e-14	1.5	3.34784e+19	4.59012e+19	7.46536e+06	163766	8.85211e-15	406322	20171	329000	8000	0.497768	Reusser et al., 2015, Geology, DOI:10.1130/G36272.1
SV08-1	441	CH-03	2020-09-23	21.917	2806.1	0.0028061	1.197	1405.73	1.40573e-12	1.84704e-15	1.15335e-15	1.40388e-12	1.5	3.34784e+19	6.26292e+19	61836	4.01414e+06	4.21674e-14	2.64091e+06	120496	593000	11100	6.76921	Kirby et al., 2010, American Geophysical Union Fall Meeting Abstracts, p. EP44A-05
SV08-12	441	CH-11	2021-08-24	21.828	4247.7	0.0042477	0.717	37.5419	3.75419e-14	1.84704e-15	1.15335e-15	3.56949e-14	1.5	3.34784e+19	9.48043e+19	61836	160221	3.69598e-15	350395	16052.5	23193.6	625.556	6.90798	Kirby et al., 2010, American Geophysical Union Fall Meeting Abstracts, p. EP44A-05
SV08-13	441	CH-11	2021-08-24	9.0094	1957.8	0.0019578	0.102	86.402	8.6402e-14	1.84704e-15	1.15335e-15	8.45549e-14	1.5	3.34784e+19	4.36961e+19	61836	412191	4.65185e-15	203268	22561.7	65960.6	1903	6.24904	Kirby et al., 2010, American Geophysical Union Fall Meeting Abstracts, p. EP44A-05
SV08-3	440	CH-11	2021-08-24	21.9875	1997.6	0.0019976	0.933	708.41	7.0841e-13	1.31162e-15	1.03034e-15	7.07098e-13	1.5	3.34784e+19	4.45844e+19	43911	1.43446e+06	1.85933e-14	828970	37701.9	207635	4726.15	6.90854	Kirby et al., 2010, American Geophysical Union Fall Meeting Abstracts, p. EP44A-05
SV08-4	440	CH-11	2021-08-24	21.9284	2484.8	0.0024848	0.492	985.513	9.85513e-13	1.31162e-15	1.03034e-15	9.84201e-13	1.5	3.34784e+19	5.54582e+19	43911	2.49042e+06	2.53854e-14	1.40783e+06	64201.1	371511	8413.04	6.70348	Kirby et al., 2010, American Geophysical Union Fall Meeting Abstracts, p. EP44A-05
SV08-7	441	CH-03	2020-09-23	12.033	2690	0.00269	0.521	44.0802	4.40802e-14	1.84704e-15	1.15335e-15	4.22332e-14	1.5	3.34784e+19	6.0038e+19	61836	214797	4.43789e-15	266442	22142.6	29500	1150	7.28125	Kirby et al., 2010, American Geophysical Union Fall Meeting Abstracts, p. EP44A-05
TG-1	432	CH-04	2020-09-23	20.0992	3756.2	0.0037562	0.075	551.646	5.51646e-13	1.32125e-15	1.33925e-15	5.50325e-13	1.5	3.34784e+19	8.38345e+19	44233.4	2.29873e+06	2.41348e-14	2.02333e+06	100667	364000	6520	6.31521	VanLandingham et al., 2022, Geochronology, DOI:10.5194/gchron-4-153-2022
TG-3	438	CH-11	2021-08-24	22.4228	3268.6	0.0032686	0.217	739.252	7.39252e-13	3.223e-15	1.00748e-15	7.36029e-13	1.5	3.34784e+19	7.29518e+19	107901	2.40032e+06	1.89513e-14	1.38253e+06	61657.4	397494	11660	6.03863	VanLandingham et al., 2022, Geochronology, DOI:10.5194/gchron-4-153-2022
TG-9	446	CH-08	2020-10-28	20.1692	3330	0.00333	0.313	652.152	6.52152e-13	4.90787e-15	1.1926e-15	6.47244e-13	1.5	3.34784e+19	7.43222e+19	164308	2.39499e+06	2.63186e-14	1.95606e+06	96982.3	411000	9920	5.82723	VanLandingham et al., 2022, Geochronology, DOI:10.5194/gchron-4-153-2022
																							Avg Diff:

## Sheet: Blanks
Original Batch ID	UVM Original Batch	UVM Project Batch	AMS Cathode Number	Al Analysis Date	From AMS: Uncorrected 26Al/27Al Ratio	From AMS: Uncorrected 26Al/27Al Ratio Uncertainty	Total 26Al Counts
BLK	403	CH-13	162236	2021-08-24	3.32976e-15	9.62352e-16	12
BLK	408	CH-13	162236	2021-08-24	5.15989e-15	1.2189e-15	18
BLK	409	CH-04	157270	2020-09-23	2.68771e-15	1.20285e-15	5
BLK	411	CH-04	157267	2020-09-23	3.06579e-15	1.37219e-15	5
BLK*	417	CH-12	162227	2021-08-24	2.2299e-13	8.28e-15	840
BLK	420	CH-12	162224	2021-08-24	2.56961e-15	1.15308e-15	12
BLK	432	CH-04	157265	2020-09-23	1.32125e-15	1.33925e-15	2
BLK	433	CH-12	162219	2021-08-24	5.81847e-16	4.57011e-16	3
BLK	435	CH-03	157261	2020-09-23	9.25754e-16	8.86594e-16	2
BLK	436	CH-03	157259	2020-09-23	8.88635e-15	2.04804e-15	19
BLK	437	CH-03	157256	2020-09-23	4.62568e-16	6.66627e-16	1
BLK	438	CH-11	162213	2021-08-24	3.223e-15	1.00748e-15	17
BLK	439	CH-04	157263	2020-09-23	6.72638e-16	9.6939e-16	1
BLK	440	CH-03	157254	2020-09-23	1.31162e-15	1.03034e-15	3
BLK	441	CH-03	157252	2020-09-23	1.84704e-15	1.15335e-15	4
BLK**	442	CH-10	162203	2021-08-24	1.97e-15	2.1e-16	0
BLK	443	CH-10	162201	2021-08-24	2.85978e-15	7.65384e-16	14
BLK	444	CH-10	162196	2021-08-24	1.74387e-15	5.52607e-16	10
BLK	445	CH-02	157249	2019-07-11	2.9776e-16	4.29096e-16	1
BLK	446	CH-02	157247	2019-07-11	4.90787e-15	1.1926e-15	17
BLK	447	CH-09	160382	2020-10-28	4.47105e-15	1.42e-15	10
BLK**	448	CH-10	162195	2021-08-24	1.97e-15	2.1e-16	0
BLKX	448	CH-13	162239	2021-08-24	1.41928e-15	9.49535e-16	5
BLK	449	CH-02	157245	2019-07-11	8.53032e-16	6.70033e-16	3
BLK	450	CH-09	160380	2020-10-28	4.02373e-15	1.42722e-15	8
BLK	453	CH-14	162285	2021-11-30	8.49844e-16	6.67483e-16	3
BLK	459	CH-09	160374	2020-10-28	2.03971e-15	1.02105e-15	4
BLK	462	CH-04	152273	2020-09-23	1.30174e-15	1.31743e-15	2
BLK	465	CH-14	162289	2021-11-30	1.74436e-15	1.20787e-15	6
BLK	466	CH-08	160369	2020-10-28	1.99913e-15	8.95392e-16	5
BLK	467	CH-08	160367	2020-10-28	4.31662e-16	6.22163e-16	1
BLK	468	CH-02	157242	2019-07-11	8.58127e-16	6.74033e-16	3
BLK	492	CH-08	160365	2020-10-28	8.05306e-16	7.71469e-16	2
BLK	496	CH-02	157240	2019-07-11	1.69463e-15	7.7153e-16	6
BLK	618	CH-01	157233	2019-07-11	5.41257e-15	1.24438e-15	19
BLK	637	CH-01	157231	2019-07-11	2.07945e-15	1.41643e-15	7
BLKX	649	CH-01	157228	2019-07-11	5.57515e-15	1.54831e-15	13
BLK*	656	CH-07	160357	2020-10-28	2.6064e-13	1.041e-14	773
		AVG			2.37091e-15
		STDEV			1.83719e-15
		UNC			6.34847e-15
*For the average blank calculation we omitted the blank from UVM Batches 417 and 656, whose measured 26/27Al ratios were two orders of magnitude greater than other blanks, suggesting they may have been mislabelled samples
**The blanks from UVM batches 448 and 442 registered 0 26Al AMS counts; a completely clean blank is theoretically possible but highly unlikely. Instead
of using 0 in the blank average calculation, we summed the 26Al counts, beam currents, and counting times for all blanks run on 08/24/21 and averaged
these to produce a combined blank value of 1.97 +/- 0.21E-15 26Al/27Al. We use this value in place of 0 for BLK 448 and 442 in the blank average, SD, and uncertainty calculations

## Sheet: Journal Style Table
Sample ID	UVM Project Batch	Quartz Mass (g)	Total 27Al Quantified by ICP-OES (μg)*	AMS Cathode Number	AMS 26Al/27Al Ratio**	AMS 26Al/27Al Ratio Uncertainty**	26Al Concentration (atoms g-1)	26Al Concentration Uncertainty (atoms g-1)
02-117-xf	CH-16	31.2683	4662.4	162862	1.49002e-13	6.44493e-15	494007	21448.5
02-122-xf	CH-16	40.2191	4257	162859	1.03551e-13	6.09125e-15	242985	14389.7
02-127-xf	CH-04	21.3826	2644.5	157262	5.95664e-14	5.75898e-15	163368	15896.5
02-135-xf	CH-14	16.4687	4061.3	162283	5.35899e-14	3.88019e-15	285871	21356.6
02-138-xf	CH-10	24.63	4759	162196	6.12384e-14	3.76373e-15	261718	16230.9
02-139-xf	CH-16	40.8306	4398.9	162858	9.4397e-14	4.91857e-15	225366	11826.9
02-145-xf	CH-09	26.6749	4756.8	160381	8.32511e-14	7.27096e-15	325730	28938.6
02-152-xf	CH-16	40.0731	5819.5	162861	1.47322e-13	6.25779e-15	476044	20282.8
02-209-xf	CH-10	22.8883	6257	162194	3.57075e-14	2.66438e-15	214983	16256.3
02-212-xf	CH-10	26.6688	6208.1	162193	2.88722e-14	2.69031e-15	147533	13977.6
02-223-xf	CH-10	21.033	5960.8	162192	6.17618e-14	3.89445e-15	387523	24633.4
02-232-xf	CH-16	40.3409	5897.7	162857	2.99514e-13	1.09642e-14	976743	35775.7
99-17-xf	CH-10	40.0164	4534.1	162202	2.33213e-13	7.7671e-15	588118	19642
99-19-xf	CH-11	40.2856	4872.7	162210	1.96641e-13	7.36765e-15	530286	19889.5
BRA-03	CH-06	20.0545	2280	160341	1.75009e-13	7.98867e-15	440118	20270.8
BRA-21	CH-06	20.4223	3713.5	160339	3.49972e-13	1.37449e-14	1.41643e+06	55782.1
BRA-47	CH-06	21.2171	2410.9	160340	6.38371e-13	2.2559e-14	1.61523e+06	57212
C_NATA	CH-09	12.3294	3977.6	160373	2.94162e-14	3.80504e-15	206268	27397.6
CAIM	CH-14	31.3389	5557.6	162284	2.0138e-13	7.09905e-15	796157	28098.2
CH-065	CH-02	15.4863	2644.5	157238	2.2753e-13	8.02891e-15	862053	30600.4
CH-066	CH-15	18.836	3441.3	162296	3.03641e-13	9.24946e-15	1.23392e+06	37715.9
CH-070	CH-06	20.2506	3228.5	160347	2.31858e-13	8.89296e-15	821090	31643.4
CH-079	CH-06	9.7717	2414.2	160343	2.2185e-13	9.23618e-15	1.21519e+06	50929.5
CH-080	CH-06	20.0181	3402.8	160342	3.10111e-13	1.01303e-14	1.17257e+06	38433.5
CH-119	CH-15	20.3249	3639.9	162299	1.25607e-13	5.90834e-15	498147	23615.7
CH-129	CH-15	19.9402	5107.9	162850	1.78421e-13	6.28615e-15	1.0161e+06	35939.5
CHAN	CH-02	5.2963	2050.4	157241	1.76197e-14	1.84655e-15	146819	15955.2
CHIVE_H	CH-08	16.7017	3504	160368	5.90865e-14	5.02104e-15	272665	23511
CU-014	CH-08	31.7777	5041.6	160360	8.91508e-14	6.76246e-15	309805	23945.5
CU-015	CH-07	20.6631	4906.38	160348	1.2458e-13	5.38715e-15	656377	28549.5
CU-016	CH-07	21.6084	2621.71	160349	2.80209e-13	1.17522e-14	755112	31824.1
CU-101	CH-01	36.7486	3424.8	157226	3.50399e-13	1.20723e-14	723759	25110.7
CU-106	CH-07	10.528	1713.72	160350	1.01415e-12	3.3608e-14	3.67689e+06	122099
CU-109	CH-07	12.099	4440.88	160352	6.06035e-14	4.26254e-15	489908	34919.1
CU-110	CH-07	21.9193	1250.6	160353	7.45503e-13	2.76792e-14	945707	35246.9
CU-111	CH-07	22.3309	1492.1	160354	1.90712e-13	1.12193e-14	280856	16731.4
CU-112	CH-07	21.7435	1708.05	160355	7.18675e-13	2.56016e-14	1.25637e+06	44886.2
CU-113	CH-01	36.5307	2700.9	157227	7.30431e-13	2.20001e-14	1.20021e+06	36303.6
CU-114	CH-08	42.507	3670.6	160361	3.85015e-13	1.78571e-14	737651	34416.1
CU-115	CH-07	21.8054	1525.29	160356	4.41999e-13	1.91082e-14	686416	29832.1
CU-116	CH-08	43.0717	5894.4	160362	2.39287e-13	1.28507e-14	726538	39250.8
CU-117	CH-08	25.1622	5982.8	160363	5.86533e-14	5.02039e-15	303842	26642
CU-119	CH-07	22.2265	5028.8	160358	4.51773e-13	1.86267e-14	2.27776e+06	94059.6
CU-121	CH-07	21.6661	3765.5	160359	8.4688e-13	2.4361e-14	3.28136e+06	94495.6
CUL	CH-13	8.114	2223	162238	1.7963e-14	2.79095e-15	101711	17066
DC-01-17	CH-04	22.5953	2091.5	157272	2.20491e-12	5.43811e-14	4.55324e+06	112347
GC-74	CH-14	20.0337	2711.3	162290	2.14666e-13	1.0612e-14	645501	32054.4
GCHC-78	CH-09	20.4454	2638.2	160379	2.88151e-13	1.88468e-14	823274	54278
GCMC-93	CH-02	20.7823	2114.8	157243	1.64154e-13	6.69416e-15	371448	15203.6
GCPR-0	CH-09	20.0113	1677.3	160375	1.77679e-13	1.08436e-14	328422	20285.4
GCSC-190	CH-09	20.2175	1947.1	160376	2.38314e-13	1.26009e-14	505590	27085.5
GCSC-205	CH-09	15.1737	1987.7	160377	3.85975e-13	1.68718e-14	1.1196e+06	49328.1
GCSC-92	CH-09	20.8302	2938.2	160378	1.26508e-13	8.75007e-15	391805	27546.9
GCTR-68	CH-02	20.2337	1982.1	157244	2.06204e-13	7.44597e-15	449428	16279.7
GLOR	CH-14	9.1158	2842.2	162291	2.41246e-14	2.49455e-15	164727	17359.1
IND	CH-14	24.8102	4555.3	162287	1.02352e-13	4.97752e-15	416228	20397.4
JP08003	CH-11	21.6644	2119.9	162206	1.59378e-13	6.29848e-15	346047	13755.6
JP08004	CH-03	21.8578	1929.4	157253	1.7333e-13	9.58983e-15	339470	18893
JP08014	CH-11	21.9531	1997.6	162207	2.36012e-13	8.83735e-15	477315	17947.7
LO18-4	CH-15	22.0209	4279.7	162854	2.94362e-13	1.01767e-14	1.27323e+06	44142.7
LO18-5	CH-15	22.9477	4590.2	162855	1.69677e-13	1.14356e-14	754053	51053.5
MJ-BC-17	CH-08	20.1334	3008.3	160366	2.08985e-12	7.08437e-14	6.96865e+06	236254
MRC-01	CH-10	21.2408	3474.5	162198	9.03937e-13	2.26946e-14	3.29564e+06	82854.9
MRC-05	CH-10	21.15	2076	162199	4.79741e-12	1.00483e-13	1.05054e+07	220132
MRC-09	CH-10	21.6847	2053.1	162200	3.22645e-13	1.10845e-14	677383	23423.2
MRC-11	CH-16	21.9538	2032.3	162860	2.13294e-13	1.28924e-14	436326	26637
MRC-14	CH-09	20.1731	1590	160383	1.90263e-13	1.1888e-14	334204	20912.6
MRC-17	CH-16	22.2066	2006.1	162863	3.98682e-12	7.50487e-14	8.03798e+06	151317
MRC-18	CH-02	21.738	2018.9	157248	2.35583e-12	4.40534e-14	4.88284e+06	91316.4
MRC-21	CH-16	21.5484	3114	162864	2.77525e-13	7.38211e-15	894654	23809.9
MRC-24	CH-16	19.9489	2429.7	162867	3.0428e-13	7.83612e-15	818907	21301.4
MRC-25	CH-16	20.1542	3166.2	162866	8.30296e-13	1.51572e-14	2.9031e+06	53145.4
MRC-26	CH-16	20.0262	2276.5	162865	4.11064e-13	1.01002e-14	1.03472e+06	25625.5
MRC-29	CH-02	20.2738	2052.4	157246	1.44106e-12	2.96211e-14	3.24789e+06	66927.1
MRC-30	CH-14	20.3598	2030.8	162282	7.61976e-13	2.33279e-14	1.68825e+06	51933
MRC-31	CH-08	21.3586	2343.8	160370	9.66952e-13	3.18538e-14	2.36055e+06	78015.9
PACORA	CH-09	25.1835	3043.2	160372	3.15237e-14	3.39486e-15	82309.3	9156.09
PAN06	CH-14	33.9791	4385.5	162288	8.40956e-14	4.51341e-15	240235	13001.3
PERE	CH-14	29.9906	4884.5	162286	2.08464e-13	7.97257e-15	755128	28980.6
POT01	CH-12	20.2835	1989.6	162217	7.4075e-13	1.65181e-14	1.62073e+06	36162.4
POT12	CH-12	20.4943	2778.4	162218	9.89706e-13	1.94115e-14	2.99367e+06	58734.7
POT30	CH-03	20.5498	1976.5	157260	8.49239e-13	2.61191e-14	1.82152e+06	56068.8
POT39	CH-03	20.119	2229.7	157258	1.4628e-12	4.43723e-14	3.60347e+06	109755
POT42	CH-03	18.5351	2325.9	157257	2.18873e-12	5.43871e-14	6.11398e+06	152323
POT48	CH-12	18.6625	3354.7	162216	1.19755e-12	2.35665e-14	4.7886e+06	94548.1
POT51	CH-11	21.4089	2961.23	162215	4.45491e-13	1.14932e-14	1.37455e+06	35480.7
POT53	CH-03	14.5076	1966.2	157255	1.22408e-12	3.42509e-14	3.70161e+06	103604
POT62	CH-11	9.8105	1915.57	162214	8.22303e-13	1.8779e-14	3.58197e+06	81837.8
POT72	CH-11	22.1316	2006.3	162211	7.86745e-13	1.83227e-14	1.58693e+06	37072
QLD04	CH-04	10.8924	2618	157271	1.2141e-13	9.16654e-15	644003	49172.9
QLD11	CH-12	20.2582	3827.9	162222	2.70703e-13	8.7343e-15	1.13739e+06	36835.1
QLD14	CH-12	8.5875	2202.1	162223	8.06853e-14	4.58706e-15	451766	26253
QLD2	CH-12	10.8795	2254.1	162220	2.4104e-13	1.11458e-14	1.10671e+06	51540.6
QLD8	CH-12	19.7773	2843.9	162221	3.99814e-13	9.87862e-15	1.27881e+06	31704.3
QVP034	CH-14	20.0326	2068.5	162292	4.07162e-13	1.13246e-14	934376	26098.5
SAP03	CH-13	20.2925	2154.8	162234	1.41285e-12	3.07262e-14	3.34294e+06	72820.6
SAP04	CH-13	17.976	2181.1	162233	1.07113e-12	2.37363e-14	2.89447e+06	64279.1
SAP12	CH-13	20.0918	2788.2	162235	9.3513e-13	2.05803e-14	2.8908e+06	63742.7
SAP15	CH-16	20.0385	1740.5	162856	1.89489e-12	4.71298e-14	3.66477e+06	91364.7
SAP17	CH-13	19.6283	2792.4	162231	5.16115e-13	1.5968e-14	1.62996e+06	50701.4
SAP36	CH-04	20.2177	1348	157269	1.86977e-12	4.83952e-14	2.77795e+06	72016.9
SAP39	CH-04	20.5395	1359.4	157268	2.56299e-12	5.87239e-14	3.7816e+06	86745.4
SAP44	CH-13	19.9728	1152.4	162230	5.18365e-12	1.32436e-13	6.67084e+06	170547
SAP49	CH-04	20.0087	1751.8	157266	1.75352e-12	4.65174e-14	3.42137e+06	90898.2
SAP63	CH-13	19.9522	2250.4	162228	9.5256e-13	2.21995e-14	2.39278e+06	55883.8
SAP65	CH-13	20.9599	2068.8	162229	1.62381e-12	3.77248e-14	3.57227e+06	83105.6
SAP68	CH-12	20.1152	1961.4	162226	1.4934e-12	2.91758e-14	2.87894e+06	63494.9
SAP69	CH-12	20.1439	2056.6	162225	2.34509e-13	8.85211e-15	163766	20171
SV08-1	CH-03	21.917	2806.1	157250	1.40573e-12	4.21674e-14	4.01414e+06	120496
SV08-12	CH-11	21.828	4247.7	162205	3.75419e-14	3.69598e-15	160221	16052.5
SV08-13	CH-11	9.0094	1957.8	162204	8.6402e-14	4.65185e-15	412191	22561.7
SV08-3	CH-11	21.9875	1997.6	162208	7.0841e-13	1.85933e-14	1.43446e+06	37701.9
SV08-4	CH-11	21.9284	2484.8	162209	9.85513e-13	2.53854e-14	2.49042e+06	64201.1
SV08-7	CH-03	12.033	2690	157251	4.40802e-14	4.43789e-15	214797	22142.6
TG-1	CH-04	20.0992	3756.2	157264	5.51646e-13	2.41348e-14	2.29873e+06	100667
TG-3	CH-11	22.4228	3268.6	162212	7.39252e-13	1.89513e-14	2.40032e+06	61657.4
TG-9	CH-08	20.1692	3330	160371	6.52152e-13	2.63186e-14	2.39499e+06	96982.3
*27Al was added only to samples with insufficient total Al through commercial SPEX ICP standard with a concentration of 1000 μg mL-1. The total here reflects the sum of Al added through carrier and native Al in quartz.
**Isotopic analysis was conducted at PRIME Laboratory; ratios were normalized against standard KNSTD with an assumed ratio of 1.818 x 10-12 (Nishiizumi et al., 2004).
